# Supplementary material for: A mechanistic study of chiral manganese porphyrin-catalyzed enantioselective C–H hydroxylation reaction
Source: Royal Society of Chemistry journal article supplement (doi:10.1039/d4dt02452d), 2024-11-04
Supplement: d4dt02452d1.pdf [file d4dt02452d1.pdf]

## *Supporting Information*

# **A Mechanistic Study of Chiral Manganese Porphyrin-Catalyzed Enantioselective C–H Hydroxylation Reaction**

Jing-Kun Gao, Wandong Chen, Junjie Tai, Zhengwei Chen, Hang Liu, Yuxin Du, Yiting Jiang, Yuanbin She\*, and Yun-Fang Yang\*

College of Chemical Engineering, Zhejiang University of Technology, Hangzhou, Zhejiang 310014, China

\*E-mail: sheyb@zjut.edu.cn

\*E-mail: yangyf@zjut.edu.cn

### **Table of Contents**

|                                                                                                                                                                                                 |    |
|-------------------------------------------------------------------------------------------------------------------------------------------------------------------------------------------------|----|
| Fig. S1 The barrier for hydroxylation reaction of the methylene pro-(S) C–H bond at the C-3 position of the heterocyclic carbon skeleton in chiral and achiral catalyst systems.....            | S3 |
| Fig. S2 The key transition state structures that determine enantioselectivity and site-selectivity.....                                                                                         | S4 |
| Fig. S3 Optimized geometries and Gibbs free energy for C-3 position methylene H-abstraction transition state <b>TS2</b> with the chiral directing group forming H-bonding interaction .....     | S5 |
| Fig. S4 Optimized geometries and Gibbs free energy for C-3 position methylene H-abstraction transition state <b>TS4</b> with the chiral directing group not forming H-bonding interaction ..... | S5 |
| Fig. S5 Optimized geometries and Gibbs free energy for C-3 position methylene H-abstraction transition state <b>TS5</b> with the chiral directing group on the Mn–Cl side.....                  | S6 |
| Fig. S6 Optimized geometries and Gibbs free energy for C-7 position methylene H-abstraction transition state <b>TS6</b> with the chiral directing group not forming H-bonding interaction ..... | S6 |
| Fig. S7 Optimized geometries and Gibbs free energy for C-7 position methylene H-abstraction transition state <b>TS7</b> with the chiral directing group on the Mn–Cl side.....                  | S7 |
| Fig. S8 Optimized geometries and Gibbs free energy for C-3 position methylene H-abstraction transition state <b>TS8</b> without the chiral directing group.....                                 | S7 |
| Fig. S9 Optimized geometries and Gibbs free energy for C-7 position methylene H-                                                                                                                |    |

|                                                                                                                                 |     |
|---------------------------------------------------------------------------------------------------------------------------------|-----|
| abstraction transition state <b>TS9</b> without the chiral directing group.....                                                 | S8  |
| Fig. S10 The dihedral angle analysis of substrate distortion in <sup>3</sup> <b>TS2-R</b> vs. <sup>3</sup> <b>TS2-S</b> . ..... | S8  |
| Table S1. Electronic Energies and Free Energies of the Structures Calculated .....                                              | S9  |
| Table S2. The Calculated Energy of the Key Transition States using Different Basis Sets..                                       | S10 |
| Cartesian coordinates of the structures .....                                                                                   | S11 |

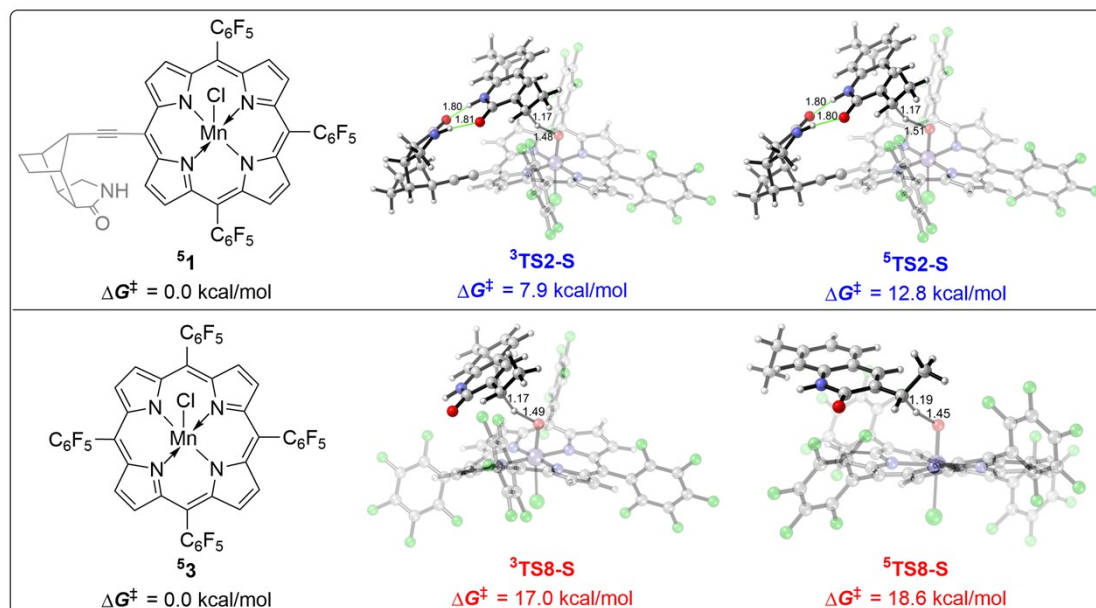

**Fig. S1** The barrier for hydroxylation reaction of the methylene *pro*-(*S*) C–H bond at the heterocyclic C-3 position of the heterocyclic carbon skeleton in chiral and achiral catalyst systems. Gibbs free energies are shown in kcal/mol. The distances are in Å.

The barrier for the hydroxylation reaction of the methylene *pro*-(*S*) C–H bond at the heterocyclic C-3 position of the heterocyclic carbon skeleton in the chiral catalyst **51** system is much lower than that in the achiral catalyst **53** system. The chiral system has a 9.1 kcal/mol barrier advantage over the achiral system. The two-point hydrogen bonding interaction between chiral catalyst **51** and substrate can contribute to the stability of high valent metal intermediates, effectively stabilizing the transition state structure, reducing the energy of the system, and reducing the energy barrier for hydrogen atom abstraction transition state. Therefore, catalysts with chiral lactam units had a rate accelerating effect than **Mn**[TPFPP]Cl catalysts.

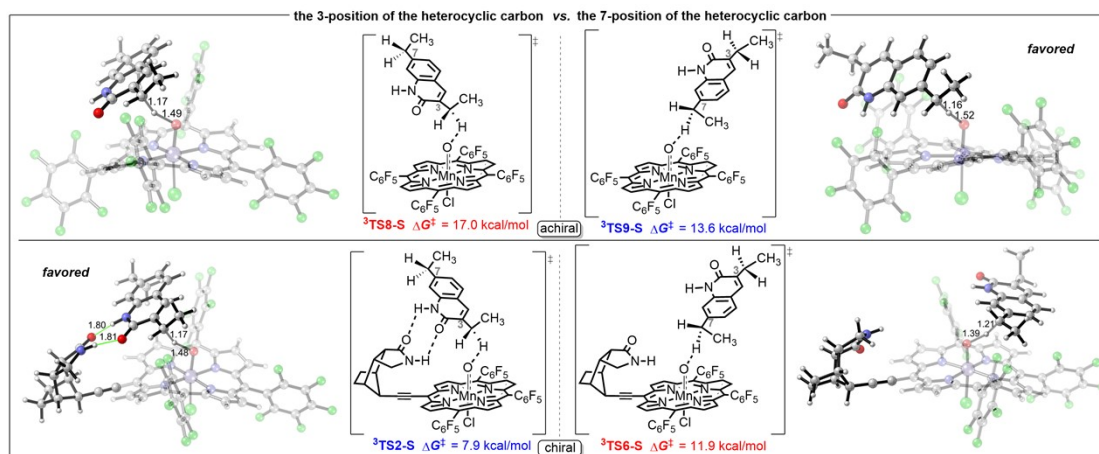

**Fig. S2** The key transition state structures that determine enantioselectivity and site-selectivity. Gibbs free energies are shown in kcal/mol. The distances are in Å.

In the achiral **Mn**[**TPFPP**]**Cl** system, the transition state energy barrier for hydrogen atom abstraction of the methylene *pro*-(*S*) C–H bond at the heterocyclic C-3 position is 3.4 kcal/mol higher than the methylene *pro*-(*S*) C–H bond at the heterocyclic C-7 position. In the chiral catalyst system, the presence of two-point hydrogen bonding interactions orients the methylene *pro*-(*S*) C–H bond at the heterocyclic C-3 position of the substrate close to the Mn-oxo center. The presence of directing groups can shorten the distance between substrate reaction sites and catalyst active centers, and the barrier of abstraction of the methylene *pro*-(*S*) C–H bond at the heterocyclic C-3 position decreased to 7.9 kcal/mol leading to the reversal of site-selectivity.

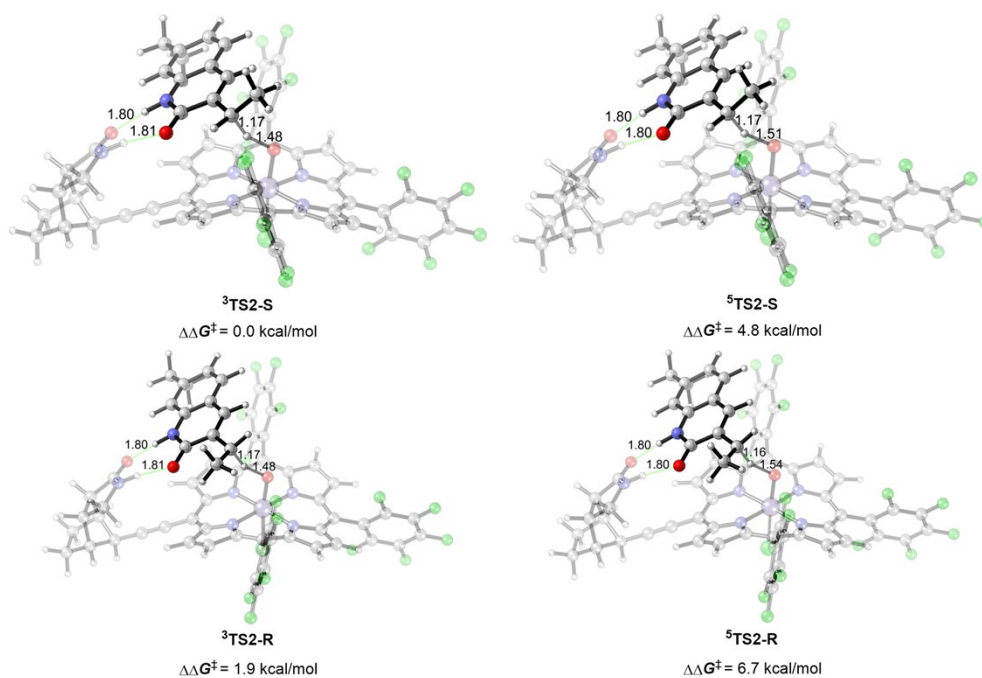

**Fig. S3** Optimized geometries and Gibbs free energy for C-3 position methylene H-abstraction transition state **TS2** with the chiral directing group forming H-bonding interaction. The distances are in Å.

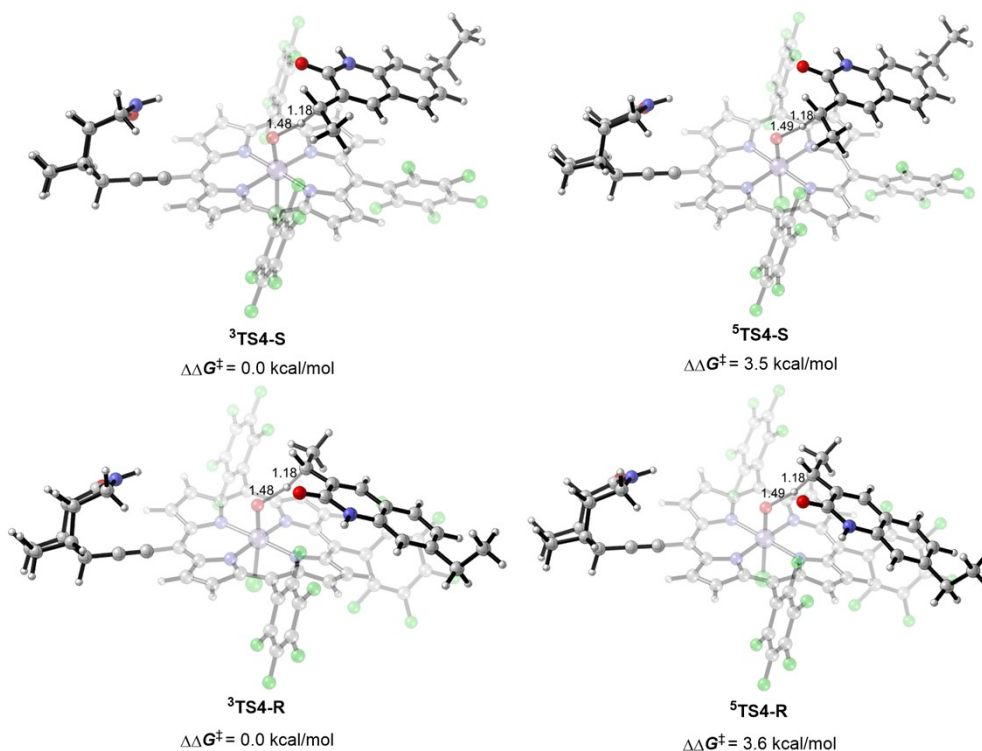

**Fig. S4** Optimized geometries and Gibbs free energy for C-3 position methylene H-abstraction transition state **TS4** with the chiral directing group not forming H-bonding interaction. The distances are in Å.

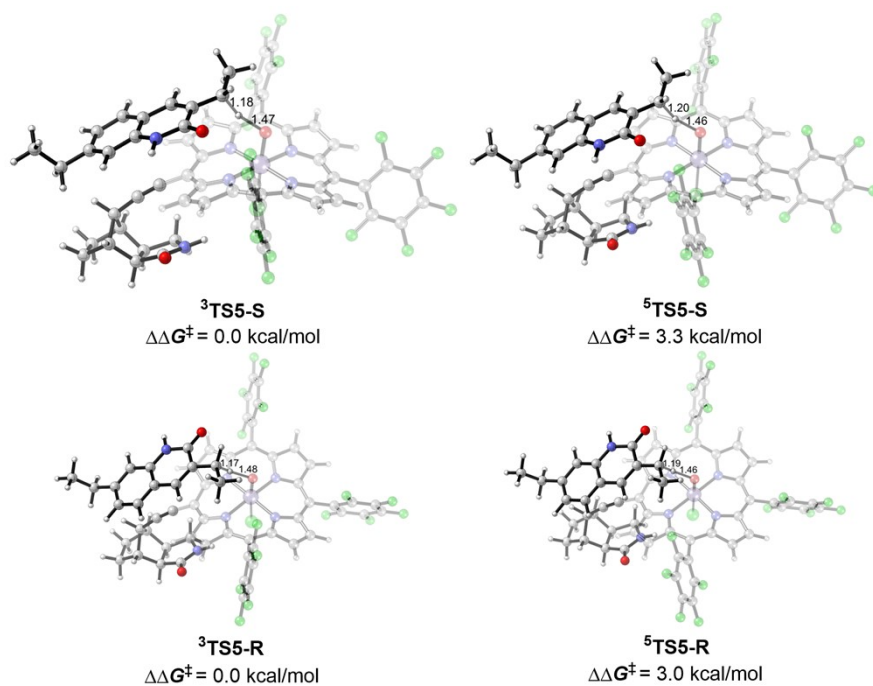

**Fig. S5** Optimized geometries and Gibbs free energy for C-3 position methylene H-abstraction transition state **TS5** with the chiral directing group on the Mn–Cl side. The distances are in Å.

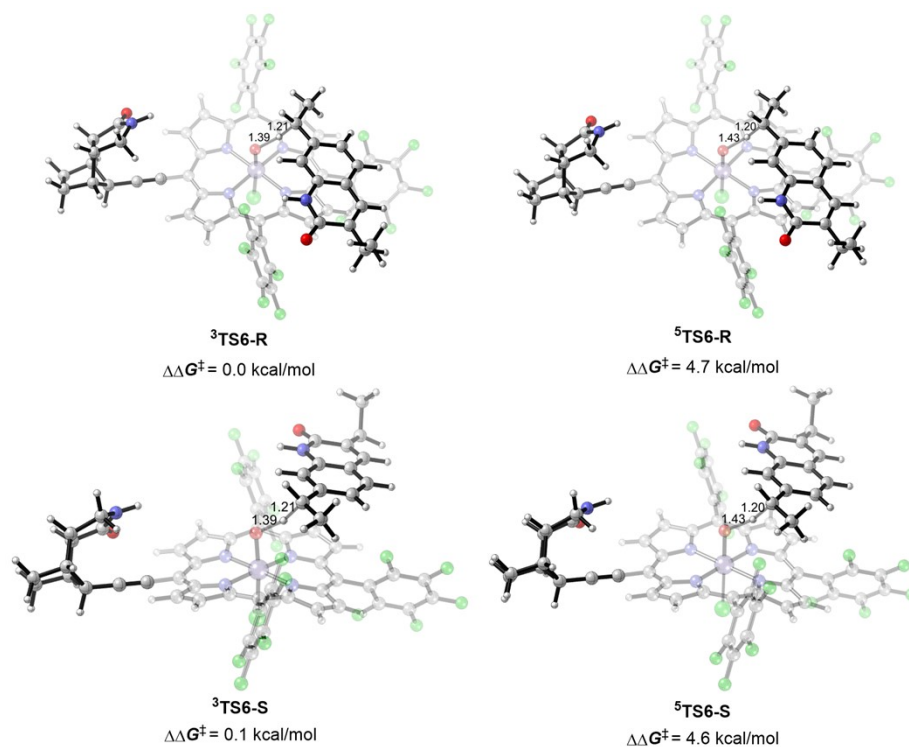

**Fig. S6** Optimized geometries and Gibbs free energy for C-7 position methylene H-abstraction transition state **TS6** with the chiral directing group not forming H-bonding interaction. The distances are in Å.

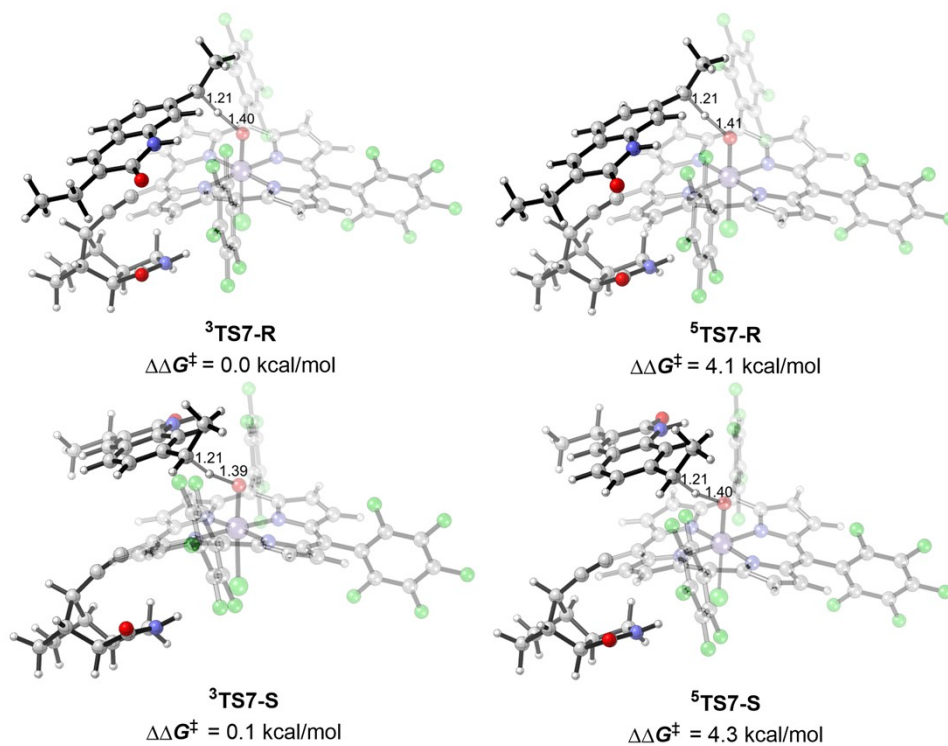

**Fig. S7** Optimized geometries and Gibbs free energy for C-7 position methylene H-abstraction transition state **TS7** with the chiral directing group on the Mn–Cl side. The distances are in Å.

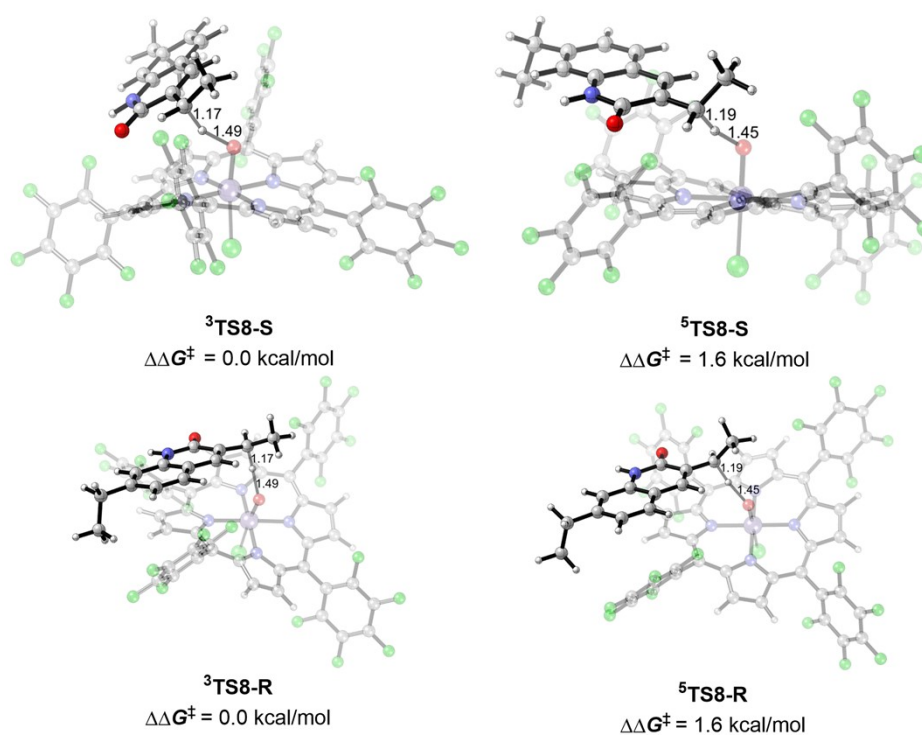

**Fig. S8** Optimized geometries and Gibbs free energy for C-3 position methylene H-abstraction transition state **TS8** without the chiral directing group. The distances are in Å.

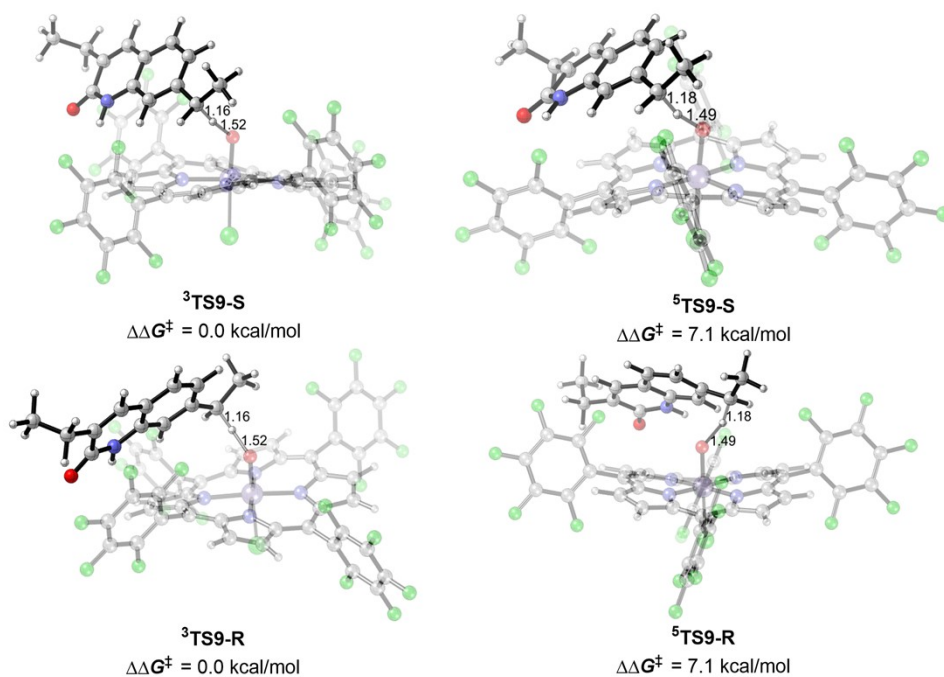

**Fig. S9** Optimized geometries and Gibbs free energy for C-7 position methylene H-abstraction transition state **TS9** without the chiral directing group. The distances are in Å.

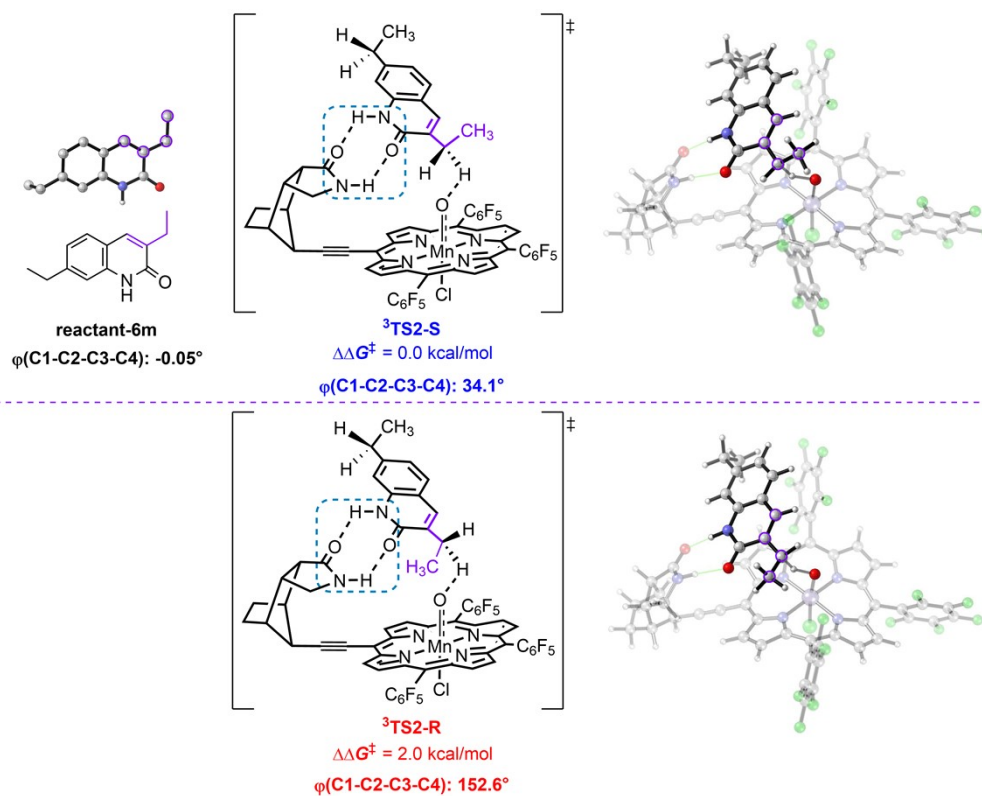

**Fig. S10** The dihedral angle analysis of substrate distortion in  ${}^3\text{TS2-R}$  vs.  ${}^3\text{TS2-S}$ .



**Table S1. Electronic Energies and Free Energies (in Hartree) of the Structures Calculated at the (U)B3LYP-D3/def2-TZVP (SMD: Dichloromethane)//(U)B3LYP-D3/6-31G(d)-LANL2DZ Level**

| Structures             | ZPVE     | TCE      | TCH      | TCG      | E            | G(E+TCG)     | Imaginary<br>Frequenc<br>y | $\Delta G^\ddagger$ |
|------------------------|----------|----------|----------|----------|--------------|--------------|----------------------------|---------------------|
| PhIO                   | 0.091911 | 0.099402 | 0.100346 | 0.057877 | -604.708416  | -604.650539  | —                          | —                   |
| PhI                    | 0.090333 | 0.096218 | 0.097163 | 0.058573 | -529.550400  | -529.491827  | —                          | —                   |
| Sub                    | 0.254723 | 0.268373 | 0.269317 | 0.213853 | -634.724002  | -634.510149  | —                          | —                   |
| <sup>1</sup> I         | 0.600103 | 0.658619 | 0.659564 | 0.500838 | -5338.707056 | -5338.206218 | —                          | 29.3                |
| <sup>3</sup> I         | 0.600121 | 0.658599 | 0.659543 | 0.499999 | -5338.722332 | -5338.222333 | —                          | 19.2                |
| <sup>3</sup> INT1      | 0.694940 | 0.761454 | 0.762398 | 0.588553 | -5943.479022 | -5942.890469 | —                          | 8.1                 |
| <sup>3</sup> TS1       | 0.693098 | 0.759819 | 0.760763 | 0.584133 | -5943.466083 | -5942.881950 | 706.09i                    | 13.5                |
| <sup>3</sup> INT2      | 0.600573 | 0.660591 | 0.661535 | 0.498439 | -5413.900742 | -5413.402303 | —                          | 5.8                 |
| <sup>3</sup> INT3-S    | 0.858157 | 0.932389 | 0.933333 | 0.745129 | -6048.657494 | -6047.912365 | —                          | 5.9                 |
| <sup>3</sup> TS2-S     | 0.856393 | 0.929576 | 0.930521 | 0.745552 | -6048.654675 | -6047.909123 | 367.91i                    | 7.9                 |
| <sup>3</sup> INT4-S    | 0.857578 | 0.931997 | 0.932941 | 0.745248 | -6048.692971 | -6047.947723 | —                          | -16.3               |
| <sup>5</sup> I         | 0.599543 | 0.658343 | 0.659288 | 0.497561 | -5338.750443 | -5338.252882 | —                          | 0.0                 |
| <sup>5</sup> INT1      | 0.692514 | 0.760483 | 0.761428 | 0.579764 | -5943.488253 | -5942.908489 | —                          | -3.2                |
| <sup>5</sup> TS1       | 0.692023 | 0.759363 | 0.760308 | 0.581397 | -5943.467505 | -5942.886108 | -387.76i                   | 10.9                |
| <sup>5</sup> INT2      | 0.601203 | 0.661056 | 0.662000 | 0.499526 | -5413.904441 | -5413.404915 | —                          | 4.2                 |
| <sup>5</sup> INT3-S    | 0.858767 | 0.932931 | 0.933875 | 0.744749 | -6048.659251 | -6047.914502 | —                          | 4.5                 |
| MECP-1                 | —        | —        | —        | —        | -6048.652490 | —            | —                          | —                   |
| MECP-2                 | —        | —        | —        | —        | -6048.690889 | —            | —                          | —                   |
| <sup>5</sup> TS2-S     | 0.856032 | 0.929342 | 0.930286 | 0.744402 | -6048.645801 | -6047.901399 | -381.59i                   | 12.8                |
| <sup>5</sup> INT4-S    | 0.857488 | 0.931995 | 0.932939 | 0.744069 | -6048.692364 | -6047.948295 | —                          | -16.7               |
| <sup>5</sup> TS3-S     | 0.855840 | 0.930309 | 0.931253 | 0.741706 | -6048.687297 | -6047.945591 | 193.71i                    | -15.0               |
| Pro-S                  | 0.259735 | 0.274161 | 0.275105 | 0.218080 | -709.980440  | -709.762360  | —                          | —                   |
| <sup>3</sup> TS2-R_sub | —        | —        | —        | —        | -634.717671  | —            | —                          | —                   |
| <sup>3</sup> TS2-S_sub | —        | —        | —        | —        | -634.722223  | —            | —                          | —                   |
| <sup>3</sup> TS2-R     | 0.856570 | 0.929584 | 0.930528 | 0.745749 | -6048.651800 | -6047.906051 | 224.57i                    | —                   |
| <sup>5</sup> TS2-R     | 0.856392 | 0.929599 | 0.930543 | 0.744433 | -6048.642868 | -6047.898435 | 207.81i                    | —                   |
| <sup>3</sup> TS4-R     | 0.855187 | 0.929260 | 0.930204 | 0.738970 | -6048.639526 | -6047.900556 | 191.71i                    | —                   |
| <sup>3</sup> TS4-S     | 0.855217 | 0.929282 | 0.930226 | 0.739099 | -6048.639652 | -6047.900553 | 191.50i                    | —                   |
| <sup>5</sup> TS4-R     | 0.853967 | 0.928244 | 0.929188 | 0.736977 | -6048.631858 | -6047.894881 | 441.79i                    | —                   |
| <sup>5</sup> TS4-S     | 0.853985 | 0.928240 | 0.929184 | 0.737147 | -6048.632046 | -6047.894899 | 455.00i                    | —                   |
| <sup>3</sup> TS5-R     | 0.854029 | 0.928305 | 0.929250 | 0.736634 | -6048.639264 | -6047.902630 | 224.61i                    | —                   |
| <sup>3</sup> TS5-S     | 0.853727 | 0.927995 | 0.928939 | 0.736220 | -6048.638818 | -6047.902598 | 292.91i                    | —                   |

|                    |          |          |          |          |              |              |         |   |
|--------------------|----------|----------|----------|----------|--------------|--------------|---------|---|
| <sup>5</sup> TS5-R | 0.852481 | 0.926982 | 0.927926 | 0.734298 | -6048.632186 | -6047.897888 | 691.90i | — |
| <sup>5</sup> TS5-S | 0.852333 | 0.926803 | 0.927747 | 0.734080 | -6048.631418 | -6047.897338 | 702.65i | — |
| <sup>3</sup> TS6-R | 0.854256 | 0.928089 | 0.929033 | 0.739243 | -6048.642204 | -6047.902961 | 602.45i | — |
| <sup>3</sup> TS6-S | 0.854262 | 0.928089 | 0.929034 | 0.739393 | -6048.642147 | -6047.902754 | 596.12i | — |
| <sup>5</sup> TS6-R | 0.853876 | 0.927815 | 0.928759 | 0.738308 | -6048.633802 | -6047.895494 | 631.60i | — |
| <sup>5</sup> TS6-S | 0.853859 | 0.927810 | 0.928754 | 0.738198 | -6048.633791 | -6047.895593 | 620.31i | — |
| <sup>3</sup> TS7-R | 0.853794 | 0.927837 | 0.928781 | 0.738367 | -6048.640073 | -6047.901706 | 530.39i | — |
| <sup>3</sup> TS7-S | 0.853821 | 0.927854 | 0.928798 | 0.738551 | -6048.640127 | -6047.901576 | 560.49i | — |
| <sup>5</sup> TS7-R | 0.852981 | 0.927171 | 0.928116 | 0.736875 | -6048.632108 | -6047.895233 | 867.52i | — |
| <sup>5</sup> TS7-S | 0.852993 | 0.927183 | 0.928127 | 0.737058 | -6048.631991 | -6047.894933 | 908.08i | — |
| <sup>3</sup> TS8-R | 0.691196 | 0.763921 | 0.764865 | 0.579649 | -6220.172910 | -6219.593261 | 387.62i | — |
| <sup>3</sup> TS8-S | 0.691197 | 0.763921 | 0.764865 | 0.579654 | -6220.172905 | -6219.593251 | 387.62i | — |
| <sup>5</sup> TS8-R | 0.690342 | 0.763138 | 0.764082 | 0.576711 | -6220.167441 | -6219.590730 | 409.32i | — |
| <sup>5</sup> TS8-S | 0.690342 | 0.763138 | 0.764082 | 0.576711 | -6220.167441 | -6219.590730 | 409.31i | — |
| <sup>3</sup> TS9-R | 0.692257 | 0.765053 | 0.765997 | 0.579342 | -6220.178003 | -6219.598661 | 160.40i | — |
| <sup>3</sup> TS9-S | 0.692257 | 0.765053 | 0.765997 | 0.579342 | -6220.178003 | -6219.598661 | 160.41i | — |
| <sup>5</sup> TS9-R | 0.690904 | 0.763914 | 0.764859 | 0.576881 | -6220.164202 | -6219.587321 | 431.52i | — |
| <sup>5</sup> TS9-S | 0.690904 | 0.763914 | 0.764859 | 0.576881 | -6220.164202 | -6219.587321 | 431.52i | — |

ZPVE = zero-point vibrational energy; TCE = thermal correction to energy; TCH = thermal correction to enthalpy; TCG = thermal correction to Gibbs free energy. Energies are shown in kcal mol<sup>-1</sup>.

**Table S2. The Calculated Energy (kcal/mol) of the Key Transition States using Different Basis Sets.**

| Transition Structures          | <sup>3</sup> TS2-S | <sup>3</sup> TS2-R | <sup>5</sup> TS2-S | <sup>5</sup> TS2-R | $\Delta\Delta G^{\ddagger a}$ |
|--------------------------------|--------------------|--------------------|--------------------|--------------------|-------------------------------|
| def2-TZVP//6-31G(d)-LANL2DZ    | 7.9                | 9.8                | 12.8               | 14.6               | 1.9                           |
| def2-TZVPP//6-31G(d,p)-LANL2DZ | 8.4                | 10.4               | 13.1               | 15.0               | 2.0                           |

<sup>a</sup>  $\Delta\Delta G^{\ddagger} = \Delta G^{\ddagger}_{3TS2-R} - \Delta G^{\ddagger}_{3TS2-S}$

We conducted additional calculations on the hydrogen atom abstraction transition state structure involving the C–H breaking step at the B3LYP-D3/def2-TZVPP-SMD(Dichloromethane)//B3LYP-D3/6-31G(d,p)-LANL2DZ level. The energy ordering of the hydrogen atom abstraction transition state under the new basis set are the same. Related results have been included in Table S2 in the revised Supporting Information.

## Cartesian coordinates of the structures

(U)B3LYP-D3/def2-TZVP-SMD(Dichloromethane)//B3LYP-D3/6-31G(d)-LANL2DZ

<sup>1</sup>1

|    |             |             |             |
|----|-------------|-------------|-------------|
| C  | 1.73963100  | -2.17693600 | -0.23882700 |
| C  | 3.15892600  | -2.40072400 | -0.32017000 |
| C  | 3.75456400  | -1.18008400 | -0.39583300 |
| C  | 2.69767800  | -0.20647600 | -0.34701000 |
| N  | 1.46720500  | -0.82110300 | -0.24241600 |
| H  | 3.64269700  | -3.36641100 | -0.31727600 |
| H  | 4.81127100  | -0.96874500 | -0.47820700 |
| C  | -0.07682600 | 3.08987100  | -0.14851500 |
| C  | 0.90205900  | 4.14291900  | -0.20947500 |
| C  | 2.12039300  | 3.54588000  | -0.30483800 |
| C  | 1.88993900  | 2.12852900  | -0.30048800 |
| N  | 0.54393300  | 1.85550300  | -0.19550500 |
| H  | 0.68305600  | 5.20004200  | -0.17259400 |
| H  | 3.09492700  | 4.00710200  | -0.36956500 |
| C  | -2.55226000 | -2.01751100 | 0.08803100  |
| C  | -2.77914500 | -3.43924000 | 0.07024400  |
| C  | -1.56152500 | -4.03343800 | -0.02749000 |
| C  | -0.58208800 | -2.97925400 | -0.07013800 |
| N  | -1.20096100 | -1.74677700 | 0.00094800  |
| H  | -3.74651800 | -3.91739100 | 0.11503200  |
| H  | -1.34299600 | -5.08998000 | -0.07704600 |
| C  | -3.35092700 | 0.30961200  | 0.16707600  |
| C  | -4.40049000 | 1.28972200  | 0.26769700  |
| C  | -3.81054300 | 2.51106600  | 0.19156400  |
| C  | -2.39501300 | 2.28600400  | 0.05868900  |
| N  | -2.12375800 | 0.93155700  | 0.05270700  |
| H  | -5.45122200 | 1.06915000  | 0.38489100  |
| H  | -4.28894800 | 3.47886500  | 0.22139500  |
| C  | 0.79125700  | -3.19695200 | -0.17219400 |
| C  | -1.45015400 | 3.30636900  | -0.04049200 |
| C  | 2.91991700  | 1.17752700  | -0.37657800 |
| C  | -3.56959600 | -1.06809600 | 0.17519800  |
| Mn | -0.35262600 | 0.05042600  | -0.37547800 |
| Cl | -0.55552900 | 0.01724700  | -2.57176400 |
| C  | -1.93477900 | 4.71673000  | -0.02261800 |
| C  | -2.45141700 | 5.29453000  | 1.14063200  |

|   |             |             |             |
|---|-------------|-------------|-------------|
| C | -1.88554200 | 5.51508100  | -1.16958800 |
| C | -2.90823700 | 6.60999800  | 1.16863600  |
| F | -2.52369300 | 4.57346700  | 2.26798700  |
| C | -2.32975500 | 6.83573800  | -1.16413500 |
| F | -1.39384300 | 5.01579900  | -2.30900500 |
| C | -2.84435600 | 7.38258000  | 0.01019200  |
| F | -3.39965500 | 7.13616000  | 2.29568000  |
| F | -2.26974000 | 7.57811700  | -2.27418400 |
| F | -3.27525400 | 8.64571900  | 0.02589200  |
| C | -4.97519600 | -1.55450700 | 0.28053300  |
| C | -5.43858400 | -2.19409200 | 1.43420100  |
| C | -5.88230000 | -1.39056200 | -0.77115300 |
| C | -6.74740400 | -2.65797100 | 1.54313100  |
| F | -4.61071800 | -2.38146100 | 2.47082400  |
| C | -7.19834400 | -1.83927300 | -0.68258200 |
| F | -5.49465100 | -0.78051800 | -1.89716000 |
| C | -7.62980600 | -2.47692900 | 0.47939400  |
| F | -7.16276500 | -3.26789400 | 2.65827900  |
| F | -8.04562600 | -1.66756700 | -1.70222200 |
| F | -8.88740200 | -2.91364200 | 0.57375900  |
| C | 1.27667300  | -4.60632500 | -0.21425100 |
| C | 1.81646800  | -5.15398300 | -1.38221500 |
| C | 1.21166800  | -5.43118500 | 0.91236000  |
| C | 2.27712200  | -6.46800700 | -1.43139900 |
| F | 1.90600600  | -4.40800100 | -2.48871800 |
| C | 1.65984200  | -6.74953200 | 0.88557900  |
| F | 0.69977200  | -4.95742600 | 2.05690300  |
| C | 2.19607300  | -7.26729000 | -0.29228100 |
| F | 2.78908000  | -6.96746200 | -2.56041300 |
| F | 1.58403200  | -7.51667100 | 1.97843900  |
| F | 2.63098300  | -8.52849900 | -0.32918700 |
| C | 4.26155000  | 1.65361600  | -0.44650700 |
| C | 5.39712300  | 2.08182000  | -0.44578400 |
| C | 6.73816500  | 2.64753500  | -0.43055500 |
| H | 6.79734500  | 3.39545900  | -1.23327400 |
| C | 7.22514900  | 3.28117900  | 0.91455700  |
| H | 6.56990800  | 4.04967000  | 1.33375200  |
| C | 7.95292000  | 1.67346000  | -0.52593100 |
| H | 7.94243000  | 0.97754700  | -1.36674700 |
| C | 9.11711700  | 2.69062300  | -0.51817600 |
| H | 10.05767700 | 2.22826700  | -0.20256800 |
| H | 9.27624600  | 3.10446600  | -1.51949200 |
| C | 8.61977300  | 3.79387300  | 0.47928800  |
| H | 9.28999000  | 3.92228000  | 1.33557700  |

|   |            |             |             |
|---|------------|-------------|-------------|
| H | 8.53470300 | 4.76656800  | -0.01632500 |
| C | 7.44427900 | 2.05950800  | 1.84067900  |
| H | 8.18738300 | 2.30070900  | 2.60554000  |
| C | 7.94630300 | 0.96728400  | 0.84882300  |
| H | 8.93849100 | 0.56866900  | 1.08360400  |
| C | 6.17580800 | 1.45914300  | 2.51777000  |
| H | 5.27674100 | 2.03614800  | 2.27141900  |
| H | 6.27592700 | 1.43423100  | 3.60898100  |
| C | 6.93985000 | -0.17442200 | 0.95086400  |
| O | 6.90689600 | -1.16751500 | 0.23554700  |
| N | 6.08721600 | 0.10840100  | 1.97784600  |
| H | 5.26544100 | -0.46898600 | 2.10305800  |

<sup>31</sup>

|   |             |             |             |
|---|-------------|-------------|-------------|
| C | 1.74624800  | -2.17360300 | -0.23545700 |
| C | 3.16620400  | -2.39378900 | -0.32347800 |
| C | 3.75803500  | -1.17122600 | -0.39588400 |
| C | 2.69791900  | -0.20069800 | -0.33910600 |
| N | 1.46991700  | -0.81866900 | -0.23002400 |
| H | 3.65291000  | -3.35803300 | -0.32717900 |
| H | 4.81381700  | -0.95687400 | -0.48206300 |
| C | -0.08387400 | 3.09331900  | -0.14475100 |
| C | 0.89289500  | 4.14859600  | -0.21118300 |
| C | 2.11225100  | 3.55331000  | -0.30311500 |
| C | 1.88392000  | 2.13506700  | -0.29197600 |
| N | 0.53905100  | 1.85977800  | -0.18324400 |
| H | 0.67219800  | 5.20559100  | -0.18023700 |
| H | 3.08575900  | 4.01639300  | -0.37021500 |
| C | -2.54572600 | -2.02283900 | 0.09760600  |
| C | -2.77146200 | -3.44510700 | 0.07381500  |
| C | -1.55323700 | -4.03742600 | -0.02748500 |
| C | -0.57522100 | -2.98121200 | -0.06531400 |
| N | -1.19473000 | -1.74987800 | 0.01403800  |
| H | -3.73816300 | -3.92486400 | 0.11665400  |
| H | -1.33376600 | -5.09354900 | -0.08247300 |
| C | -3.35084000 | 0.30482500  | 0.17542300  |
| C | -4.40467300 | 1.28173900  | 0.26865600  |
| C | -3.81867300 | 2.50473900  | 0.18910600  |
| C | -2.40163900 | 2.28328200  | 0.06223000  |
| N | -2.12514500 | 0.93015800  | 0.06508800  |
| H | -5.45514000 | 1.05843700  | 0.38320100  |
| H | -4.30073700 | 3.47093900  | 0.21287200  |
| C | 0.79905300  | -3.19512500 | -0.17044800 |
| C | -1.45829000 | 3.30556100  | -0.03922200 |

|    |             |             |             |
|----|-------------|-------------|-------------|
| C  | 2.91528600  | 1.18462900  | -0.36682600 |
| C  | -3.56423000 | -1.07410900 | 0.18480300  |
| Mn | -0.35153500 | 0.05105600  | -0.35687600 |
| Cl | -0.55220100 | 0.01621300  | -2.54219900 |
| C  | -1.94713500 | 4.71464800  | -0.02875200 |
| C  | -2.46921100 | 5.29533600  | 1.13059600  |
| C  | -1.89694100 | 5.50848800  | -1.17875500 |
| C  | -2.93007500 | 6.60952100  | 1.15197300  |
| F  | -2.54263000 | 4.57854400  | 2.26054400  |
| C  | -2.34537900 | 6.82770900  | -1.17996000 |
| F  | -1.40046000 | 5.00610900  | -2.31479400 |
| C  | -2.86514800 | 7.37765000  | -0.00936300 |
| F  | -3.42647900 | 7.13865300  | 2.27542200  |
| F  | -2.28445900 | 7.56577400  | -2.29285000 |
| F  | -3.30000600 | 8.63949600  | -0.00002800 |
| C  | -4.96899200 | -1.56433600 | 0.28725000  |
| C  | -5.43275600 | -2.20368900 | 1.44082400  |
| C  | -5.87399700 | -1.40515800 | -0.76686400 |
| C  | -6.74037900 | -2.67148000 | 1.54754100  |
| F  | -4.60655900 | -2.38680100 | 2.47946500  |
| C  | -7.18873500 | -1.85810500 | -0.68066500 |
| F  | -5.48555500 | -0.79592900 | -1.89308700 |
| C  | -7.62084500 | -2.49512800 | 0.48142000  |
| F  | -7.15636300 | -3.28091600 | 2.66270700  |
| F  | -8.03415200 | -1.69100200 | -1.70263600 |
| F  | -8.87725000 | -2.93575800 | 0.57357300  |
| C  | 1.28669700  | -4.60359000 | -0.22008200 |
| C  | 1.82592200  | -5.14483000 | -1.39124700 |
| C  | 1.22391000  | -5.43390500 | 0.90260700  |
| C  | 2.28824300  | -6.45798000 | -1.44727200 |
| F  | 1.91298700  | -4.39347700 | -2.49435900 |
| C  | 1.67402900  | -6.75143700 | 0.86903300  |
| F  | 0.71260000  | -4.96632900 | 2.04990500  |
| C  | 2.20963600  | -7.26280500 | -0.31189200 |
| F  | 2.79951100  | -6.95133600 | -2.57929200 |
| F  | 1.60054700  | -7.52389300 | 1.95829100  |
| F  | 2.64629000  | -8.52320700 | -0.35533100 |
| C  | 4.25577300  | 1.66376300  | -0.43801100 |
| C  | 5.39041300  | 2.09457400  | -0.43693700 |
| C  | 6.72961400  | 2.66449500  | -0.42067200 |
| H  | 6.78465500  | 3.41742300  | -1.21899300 |
| C  | 7.21638400  | 3.29205300  | 0.92743100  |
| H  | 6.55891800  | 4.05559800  | 1.35211600  |
| C  | 7.94781200  | 1.69555200  | -0.52372700 |

|   |             |             |             |
|---|-------------|-------------|-------------|
| H | 7.93856300  | 1.00451200  | -1.36856700 |
| C | 9.10810800  | 2.71709800  | -0.51200900 |
| H | 10.05098300 | 2.25646800  | -0.20082300 |
| H | 9.26388400  | 3.13748400  | -1.51113100 |
| C | 8.60834900  | 3.81251500  | 0.49285100  |
| H | 9.27950900  | 3.93829900  | 1.34879100  |
| H | 8.51882100  | 4.78783500  | 0.00322200  |
| C | 7.44155300  | 2.06575300  | 1.84592800  |
| H | 8.18487100  | 2.30530300  | 2.61110000  |
| C | 7.94622800  | 0.98136900  | 0.84688700  |
| H | 8.94036100  | 0.58527600  | 1.07767100  |
| C | 6.17638200  | 1.45652600  | 2.52130200  |
| H | 5.27479300  | 2.03171900  | 2.27996500  |
| H | 6.27833100  | 1.42535900  | 3.61218100  |
| C | 6.94443000  | -0.16488800 | 0.94371500  |
| O | 6.91456800  | -1.15393400 | 0.22274600  |
| N | 6.09191900  | 0.10878400  | 1.97329800  |
| H | 5.27239900  | -0.47233500 | 2.09611100  |

**<sup>3</sup>INT1**

|   |             |             |             |
|---|-------------|-------------|-------------|
| C | -2.40742900 | -0.24443900 | -1.40790100 |
| C | -3.44974400 | -1.22814900 | -1.55658400 |
| C | -2.86505200 | -2.44830600 | -1.39601400 |
| C | -1.46168200 | -2.21249000 | -1.14802300 |
| N | -1.21515600 | -0.86080300 | -1.13121000 |
| H | -4.47564300 | -1.00443300 | -1.80952900 |
| H | -3.33853300 | -3.41785800 | -1.45018300 |
| C | 2.73926600  | -2.00646100 | -0.14918100 |
| C | 1.84598900  | -4.03457900 | -0.55344700 |
| C | 0.84749300  | -2.99406600 | -0.67655700 |
| N | 1.42083200  | -1.77030300 | -0.43659500 |
| H | 1.67922600  | -5.08904400 | -0.71702300 |
| C | 0.34399200  | 3.07956900  | -1.05719400 |
| C | -0.57364600 | 4.11304700  | -1.47401200 |
| C | -1.76953300 | 3.50882900  | -1.71634700 |
| C | -1.58185800 | 2.10307800  | -1.47066500 |
| N | -0.29160700 | 1.85883700  | -1.07404200 |
| H | -0.33072900 | 5.16120900  | -1.57317400 |
| H | -2.69623200 | 3.95788300  | -2.04335800 |
| C | 2.56980500  | 2.30162100  | -0.28510500 |
| C | 3.91299500  | 2.55361800  | 0.19436600  |
| C | 4.48026400  | 1.34280200  | 0.42549900  |
| C | 3.48810600  | 0.34406700  | 0.08520400  |
| N | 2.33457100  | 0.95358800  | -0.32523000 |

|    |             |             |             |
|----|-------------|-------------|-------------|
| H  | 4.35335000  | 3.52914600  | 0.34160900  |
| H  | 5.47356400  | 1.13816000  | 0.79769700  |
| C  | -2.60806300 | 1.14185400  | -1.54528600 |
| C  | 3.70376900  | -1.03723900 | 0.14928600  |
| C  | -0.50102600 | -3.22159300 | -0.97848000 |
| C  | 1.66405000  | 3.30412200  | -0.65031400 |
| Mn | 0.57526600  | 0.04148400  | -0.76256200 |
| Cl | 1.13789000  | -0.08294400 | -2.96477900 |
| C  | -0.88078500 | -5.56865700 | -0.11716600 |
| C  | -1.44031800 | -5.09380400 | -2.38285200 |
| C  | -1.29851600 | -6.88735800 | -0.27033700 |
| C  | -1.87062000 | -6.40720600 | -2.56135200 |
| C  | -1.79841000 | -7.30808100 | -1.50079700 |
| F  | -1.22598800 | -7.74693000 | 0.75294800  |
| F  | -2.20618300 | -8.56921200 | -1.66251800 |
| F  | -2.34386600 | -6.81090500 | -3.74492600 |
| F  | -1.51855700 | -4.26369800 | -3.42792600 |
| F  | -0.39196200 | -5.20789300 | 1.08431800  |
| C  | -0.94508900 | -4.63365800 | -1.15537200 |
| C  | 2.12904600  | 4.71877500  | -0.58137700 |
| C  | 1.60411000  | 5.60700900  | 0.36264600  |
| C  | 3.10449800  | 5.21488700  | -1.45242000 |
| C  | 2.02032400  | 6.93337000  | 0.44044200  |
| F  | 0.66751800  | 5.18718700  | 1.22721300  |
| C  | 3.54299300  | 6.53623700  | -1.38888800 |
| F  | 3.64660000  | 4.41299000  | -2.37507900 |
| C  | 2.99611400  | 7.39769300  | -0.43973900 |
| F  | 1.49792500  | 7.75961600  | 1.35483700  |
| F  | 4.47746800  | 6.98449600  | -2.23413100 |
| F  | 3.40657800  | 8.66697200  | -0.37281200 |
| C  | -3.94434500 | 1.63570700  | -1.58996700 |
| C  | -5.04719100 | 2.11510600  | -1.41947900 |
| C  | -6.28543300 | 2.78531200  | -1.05077200 |
| H  | -6.50756300 | 3.55939400  | -1.79785300 |
| C  | -7.56613700 | 1.93568800  | -0.78300200 |
| H  | -7.89067500 | 1.29813500  | -1.60965600 |
| C  | -6.28281900 | 3.41273700  | 0.38191100  |
| H  | -5.44743500 | 4.07904700  | 0.60509500  |
| C  | -7.68156100 | 4.07210300  | 0.39934200  |
| H  | -8.04782400 | 4.22990600  | 1.41887500  |
| H  | -7.64957100 | 5.05064700  | -0.09052500 |
| C  | -8.56347300 | 3.05997100  | -0.41160700 |
| H  | -9.40999900 | 2.67788400  | 0.16824700  |
| H  | -8.97133400 | 3.52613900  | -1.31435100 |



|   |             |             |             |
|---|-------------|-------------|-------------|
| C | -7.23754300 | 1.16265700  | 0.51767400  |
| H | -8.15910800 | 0.91794700  | 1.05248500  |
| C | -6.34754800 | 2.17216800  | 1.30745200  |
| H | -6.74928500 | 2.45084500  | 2.28726600  |
| C | -6.37353600 | -0.11640500 | 0.35458100  |
| H | -6.14823900 | -0.31436600 | -0.69773700 |
| H | -6.86640000 | -1.00238600 | 0.76985400  |
| C | -5.02891400 | 1.44181000  | 1.54975400  |
| O | -4.04490100 | 1.92042600  | 2.12700700  |
| N | -5.15246000 | 0.17456100  | 1.09295500  |
| H | -4.35634900 | -0.45067400 | 1.06814500  |
| C | 3.01138800  | -3.42539600 | -0.21787000 |
| H | 3.97476300  | -3.88651500 | -0.05530000 |
| C | 5.05900100  | -1.51338800 | 0.54646000  |
| C | 6.18077800  | -1.29067800 | -0.25967400 |
| C | 5.26086600  | -2.20963900 | 1.74304000  |
| C | 7.45013500  | -1.73308800 | 0.10691600  |
| C | 6.51876900  | -2.66824200 | 2.12650800  |
| C | 7.61749700  | -2.42624100 | 1.30420400  |
| F | 4.22494600  | -2.45565700 | 2.55659800  |
| F | 6.05232700  | -0.63285000 | -1.41753000 |
| F | 6.68039300  | -3.33111300 | 3.27795400  |
| F | 8.50505900  | -1.50494400 | -0.68338100 |
| F | 8.82938800  | -2.85810700 | 1.66348800  |
| O | 0.24350700  | 0.10245300  | 1.14158300  |
| I | -1.35836100 | 0.98233500  | 1.79234300  |
| C | -2.16803200 | -0.82386900 | 2.66734500  |
| C | -1.54877600 | -2.01572900 | 2.31729300  |
| C | -3.25003700 | -0.74235000 | 3.53843900  |
| C | -2.06965400 | -3.19561900 | 2.86012100  |
| H | -0.69060200 | -2.02363800 | 1.65306200  |
| C | -3.74785200 | -1.93573200 | 4.06935400  |
| H | -3.70102900 | 0.21203800  | 3.78289700  |
| C | -3.16216800 | -3.15658600 | 3.72856000  |
| H | -1.61333500 | -4.14150400 | 2.59531800  |
| H | -4.59263400 | -1.90115600 | 4.75160700  |
| H | -3.55468800 | -4.08010200 | 4.14462800  |

**<sup>3</sup>INT2**

|   |             |             |             |
|---|-------------|-------------|-------------|
| N | 0.45944500  | 1.92936100  | -0.29669100 |
| N | -2.17409400 | 0.84094300  | 0.03573400  |
| N | -1.08363400 | -1.82727600 | 0.02653200  |
| N | 1.55009600  | -0.73895900 | -0.32616600 |
| C | 1.76954600  | 2.26405400  | -0.41777000 |

|    |             |             |             |
|----|-------------|-------------|-------------|
| C  | 1.92023700  | 3.69027400  | -0.58571100 |
| C  | 0.66644700  | 4.21328400  | -0.57817000 |
| C  | -0.24355900 | 3.10679800  | -0.38098300 |
| C  | -1.63120800 | 3.22475900  | -0.27690300 |
| C  | -2.52318500 | 2.15651100  | -0.07265000 |
| C  | -3.95327500 | 2.30697300  | 0.06575900  |
| C  | -4.46026700 | 1.06098700  | 0.25535900  |
| C  | -3.33967100 | 0.14953100  | 0.23125500  |
| C  | -3.45369800 | -1.24383300 | 0.34406100  |
| C  | -2.39788300 | -2.15788700 | 0.21887000  |
| C  | -2.55297700 | -3.59529800 | 0.23519000  |
| C  | -1.31952900 | -4.12194200 | 0.02412900  |
| C  | -0.40686300 | -3.00685700 | -0.09342500 |
| C  | 0.97851000  | -3.13374400 | -0.29143100 |
| C  | 1.88076500  | -2.06956200 | -0.38943900 |
| C  | 3.31164600  | -2.21773900 | -0.53643400 |
| C  | 3.83958800  | -0.96543000 | -0.55769200 |
| C  | 2.72443300  | -0.05580600 | -0.42606400 |
| C  | 2.85364900  | 1.35140000  | -0.42044700 |
| H  | 2.86315500  | 4.20116500  | -0.71438800 |
| H  | 0.37931000  | 5.24678400  | -0.70397600 |
| H  | -4.49382000 | 3.24101100  | 0.02741400  |
| H  | -5.49548400 | 0.78048400  | 0.38141500  |
| H  | -3.48159600 | -4.12697700 | 0.37929900  |
| H  | -1.05071300 | -5.16506900 | -0.05087700 |
| H  | 3.84477500  | -3.15405600 | -0.60947800 |
| H  | 4.87915900  | -0.69221700 | -0.66944100 |
| Mn | -0.29823000 | 0.05525900  | -0.00079200 |
| Cl | -0.56607900 | -0.03061800 | -2.40257800 |
| O  | -0.10411600 | 0.11957400  | 1.58684900  |
| C  | -4.81994700 | -1.79457300 | 0.57965500  |
| C  | -5.47204200 | -1.59821000 | 1.80090400  |
| C  | -5.50150000 | -2.51048400 | -0.40933000 |
| C  | -6.75146300 | -2.09540400 | 2.03681400  |
| C  | -6.78032300 | -3.01944100 | -0.19411600 |
| C  | -7.40581400 | -2.80908700 | 1.03386300  |
| C  | -2.21532400 | 4.59283800  | -0.38327200 |
| C  | -2.00227100 | 5.55353000  | 0.61008100  |
| C  | -2.99828300 | 4.96203000  | -1.48194600 |
| C  | -2.54127800 | 6.83448300  | 0.51869300  |
| C  | -3.54976100 | 6.23656900  | -1.59229700 |
| C  | -3.31818100 | 7.17479400  | -0.58755000 |
| C  | 1.53436800  | -4.51340000 | -0.39786200 |
| C  | 1.56069200  | -5.37311600 | 0.70432000  |

|   |             |             |             |
|---|-------------|-------------|-------------|
| C | 2.05349400  | -4.99286300 | -1.60487800 |
| C | 2.07830400  | -6.66278400 | 0.61597500  |
| C | 2.57827600  | -6.27873900 | -1.71533500 |
| C | 2.58907200  | -7.11480100 | -0.59991500 |
| F | -4.86554100 | -0.91287700 | 2.77745700  |
| F | -7.35203700 | -1.89562200 | 3.21391500  |
| F | -8.63083200 | -3.29102000 | 1.24946500  |
| F | -7.41068100 | -3.70109800 | -1.15510300 |
| F | -4.92335000 | -2.72459000 | -1.59619100 |
| F | -3.23680200 | 4.07927500  | -2.45697300 |
| F | -4.29340600 | 6.56560500  | -2.65246600 |
| F | -3.84027400 | 8.39856600  | -0.68443400 |
| F | -2.32245400 | 7.73424300  | 1.48285900  |
| F | -1.26062100 | 5.25183400  | 1.68316400  |
| F | 2.05649600  | -4.20929400 | -2.68735500 |
| F | 1.07688000  | -4.96079500 | 1.88318200  |
| F | 2.09258400  | -7.46448900 | 1.68557700  |
| F | 3.08818600  | -8.34810300 | -0.69553400 |
| F | 3.06625300  | -6.71538500 | -2.87968700 |
| C | 4.15899800  | 1.89980800  | -0.41836000 |
| C | 5.26860100  | 2.39004400  | -0.32640800 |
| C | 6.56320200  | 3.03481800  | -0.18955300 |
| H | 6.59374300  | 3.87336300  | -0.89878600 |
| C | 6.94580800  | 3.54502100  | 1.24221800  |
| H | 6.21680500  | 4.21206100  | 1.70974100  |
| C | 7.85072200  | 2.16555700  | -0.33212700 |
| H | 7.92646900  | 1.56997200  | -1.24363000 |
| C | 8.93149400  | 3.25738400  | -0.15794300 |
| H | 9.89117800  | 2.83048700  | 0.14937700  |
| H | 9.09793000  | 3.79178800  | -1.09915700 |
| C | 8.31241300  | 4.20233700  | 0.92948300  |
| H | 8.93624700  | 4.28097500  | 1.82571100  |
| H | 8.17184100  | 5.21611100  | 0.54046200  |
| C | 7.22150900  | 2.24478400  | 2.03639700  |
| H | 7.91484700  | 2.45215100  | 2.85579000  |
| C | 7.84194800  | 1.31035300  | 0.95473300  |
| H | 8.85062800  | 0.95652900  | 1.19037800  |
| C | 5.97851100  | 1.48257500  | 2.58587900  |
| H | 5.04739100  | 2.02320100  | 2.37795700  |
| H | 6.04583100  | 1.33186100  | 3.66923400  |
| C | 6.91802600  | 0.09799900  | 0.87955100  |
| O | 6.98923600  | -0.80462700 | 0.05553900  |
| N | 6.00302200  | 0.20518900  | 1.88499800  |
| H | 5.22524400  | -0.44219500 | 1.91468700  |

**<sup>3</sup>INT3-S**

|    |             |             |             |
|----|-------------|-------------|-------------|
| N  | -0.37655000 | 1.99810200  | -0.57905100 |
| N  | -2.85152500 | 0.58656400  | -0.33345300 |
| N  | -1.44886500 | -1.90556400 | -0.57800700 |
| N  | 1.01285300  | -0.48354300 | -0.81740100 |
| C  | 0.81600600  | 2.50908600  | -0.97274000 |
| C  | 0.79372300  | 3.95106900  | -0.92510600 |
| C  | -0.43473400 | 4.30302800  | -0.46119700 |
| C  | -1.17564700 | 3.07234600  | -0.27619200 |
| C  | -2.53456700 | 2.99809200  | 0.04198900  |
| C  | -3.32432300 | 1.83350700  | -0.04636800 |
| C  | -4.76487400 | 1.80090400  | 0.06474100  |
| C  | -5.14910100 | 0.52377600  | -0.20106700 |
| C  | -3.94135600 | -0.23887000 | -0.41907100 |
| C  | -3.89221300 | -1.62894100 | -0.60704600 |
| C  | -2.72091100 | -2.40130800 | -0.64964700 |
| C  | -2.68453400 | -3.84723600 | -0.66771500 |
| C  | -1.37568500 | -4.20602300 | -0.57383100 |
| C  | -0.61286000 | -2.97879500 | -0.52817800 |
| C  | 0.79319900  | -2.91017900 | -0.50519400 |
| C  | 1.54513200  | -1.74284300 | -0.67654400 |
| C  | 2.98161600  | -1.68559600 | -0.84218500 |
| C  | 3.29193300  | -0.39896100 | -1.15417700 |
| C  | 2.05131800  | 0.33954600  | -1.12113400 |
| C  | 1.95420000  | 1.73979100  | -1.31102900 |
| H  | 1.62503000  | 4.58879100  | -1.18857200 |
| H  | -0.82121500 | 5.29747300  | -0.29135200 |
| H  | -5.39953500 | 2.64434400  | 0.29164700  |
| H  | -6.15505800 | 0.13261300  | -0.23365500 |
| H  | -3.54627300 | -4.49640000 | -0.72170800 |
| H  | -0.95967500 | -5.20313500 | -0.56063600 |
| H  | 3.66140200  | -2.51452600 | -0.71874000 |
| H  | 4.26796300  | 0.03919800  | -1.30415500 |
| Mn | -0.90517700 | 0.03936000  | -0.46805800 |
| Cl | -1.21861600 | 0.11597500  | -2.85061800 |
| O  | -0.77503700 | -0.03994500 | 1.14513000  |
| C  | -5.18691100 | -2.36198900 | -0.71074900 |
| C  | -6.04484600 | -2.49771100 | 0.38455400  |
| C  | -5.57466800 | -2.96141800 | -1.91359300 |
| C  | -7.24939900 | -3.19039600 | 0.29144700  |
| C  | -6.77380400 | -3.66168800 | -2.02846000 |
| C  | -7.61279200 | -3.77435200 | -0.92105300 |
| C  | -3.20053500 | 4.27033200  | 0.44213200  |

|   |             |             |             |
|---|-------------|-------------|-------------|
| C | -2.88131800 | 4.88332700  | 1.65836200  |
| C | -4.13429300 | 4.91245000  | -0.37671800 |
| C | -3.47379400 | 6.07928100  | 2.05591500  |
| C | -4.74104500 | 6.10813100  | 0.00105000  |
| C | -4.40756900 | 6.69229700  | 1.22202000  |
| C | 1.53563400  | -4.18778100 | -0.32244000 |
| C | 1.49567900  | -4.85325100 | 0.90624400  |
| C | 2.32019900  | -4.74709800 | -1.33533600 |
| C | 2.25402200  | -5.99445000 | 1.14138800  |
| C | 3.06584200  | -5.90548800 | -1.12862800 |
| C | 3.03676400  | -6.52358300 | 0.11923200  |
| F | -5.71552600 | -1.95237600 | 1.56302800  |
| F | -8.05219000 | -3.30445300 | 1.35456100  |
| F | -8.76364300 | -4.44215800 | -1.02086500 |
| F | -7.12419400 | -4.22318800 | -3.18929800 |
| F | -4.78476700 | -2.87297700 | -2.98760900 |
| F | -4.46580900 | 4.37843500  | -1.55818900 |
| F | -5.63131000 | 6.70087800  | -0.80039400 |
| F | -4.98156200 | 7.83837700  | 1.59202100  |
| F | -3.15417600 | 6.64040100  | 3.22586700  |
| F | -1.98196500 | 4.32069600  | 2.47657700  |
| F | 2.38077000  | -4.16012900 | -2.53602700 |
| F | 0.73363800  | -4.37976600 | 1.89860500  |
| F | 2.28593000  | -6.55268600 | 2.35863300  |
| F | 3.80011300  | -7.59255100 | 0.35467000  |
| F | 3.82173100  | -6.41252900 | -2.10763500 |
| C | 3.08699700  | 2.39616300  | -1.84223600 |
| C | 4.09051200  | 2.88211000  | -2.32831000 |
| C | 5.32836100  | 3.35570000  | -2.92667200 |
| H | 5.24325900  | 3.21878100  | -4.01394800 |
| C | 5.82598300  | 4.80224400  | -2.61235000 |
| H | 5.11801700  | 5.60314100  | -2.84146100 |
| C | 6.63619500  | 2.68294700  | -2.39951400 |
| H | 6.64932300  | 1.59160300  | -2.42035400 |
| C | 7.68782100  | 3.37562000  | -3.29591100 |
| H | 8.68156300  | 3.36141500  | -2.83703500 |
| H | 7.76676800  | 2.86732000  | -4.26249400 |
| C | 7.11906000  | 4.82713400  | -3.46185300 |
| H | 7.81596300  | 5.59713400  | -3.11582800 |
| H | 6.88792700  | 5.04341600  | -4.51016600 |
| C | 6.24750000  | 4.73593700  | -1.12316100 |
| H | 7.02712300  | 5.47589200  | -0.92368300 |
| C | 6.76185900  | 3.26994300  | -0.97585300 |
| H | 7.78870800  | 3.18376300  | -0.60583300 |

|   |             |             |             |
|---|-------------|-------------|-------------|
| C | 5.10295200  | 4.87702400  | -0.08252000 |
| H | 4.14503800  | 5.11337000  | -0.56348000 |
| H | 5.31084100  | 5.66681300  | 0.64843900  |
| C | 5.81765700  | 2.62815500  | 0.03884600  |
| O | 5.79032700  | 1.41864800  | 0.31141000  |
| N | 5.02678800  | 3.57939700  | 0.56998200  |
| H | 4.18168600  | 3.29935700  | 1.09514300  |
| C | 4.66414100  | -2.85334800 | 2.56883700  |
| C | 4.67557200  | -1.53208500 | 2.13544000  |
| C | 3.56529900  | -0.69870000 | 2.36033300  |
| C | 2.41814100  | -1.18297600 | 3.02778600  |
| C | 2.41334400  | -2.53200000 | 3.43773600  |
| C | 3.50619200  | -3.35126500 | 3.21157700  |
| H | 5.54471200  | -1.11985300 | 1.62871100  |
| C | 1.33443900  | -0.27102800 | 3.26258200  |
| H | 1.53068600  | -2.92364000 | 3.93443400  |
| H | 3.47314000  | -4.38835700 | 3.53486300  |
| C | 1.37601900  | 1.03227000  | 2.86465600  |
| C | 2.54899600  | 1.51050200  | 2.13270600  |
| H | 0.45581100  | -0.65161100 | 3.77395200  |
| C | 5.88310600  | -3.73495000 | 2.38460300  |
| H | 6.68813300  | -3.14609600 | 1.92916300  |
| H | 6.25080100  | -4.04505000 | 3.37286700  |
| O | 2.63727200  | 2.67688400  | 1.69030400  |
| C | 0.29319500  | 2.05432900  | 3.10068200  |
| H | 0.75478600  | 2.93024800  | 3.57717600  |
| H | -0.04772100 | 2.41193200  | 2.12393800  |
| C | -0.90756900 | 1.57432800  | 3.91440700  |
| H | -1.62260200 | 2.39377200  | 4.03636000  |
| H | -1.41768000 | 0.75444200  | 3.39992300  |
| H | -0.61196600 | 1.23201400  | 4.91409900  |
| C | 5.63053800  | -4.99073800 | 1.53612300  |
| H | 6.55435000  | -5.56519200 | 1.40624000  |
| H | 4.89459300  | -5.65188500 | 2.00444100  |
| H | 5.25733100  | -4.72080800 | 0.54156100  |
| N | 3.57256900  | 0.61217300  | 1.93702900  |
| H | 4.38313900  | 0.93785000  | 1.38849000  |

**<sup>3</sup>INT4-S**

|   |             |             |             |
|---|-------------|-------------|-------------|
| N | -0.39806500 | 1.96676600  | -0.62001000 |
| N | -2.90923500 | 0.68708300  | -0.37618300 |
| N | -1.64111700 | -1.79799400 | -0.69581400 |
| N | 0.84798800  | -0.49979800 | -0.96241800 |
| C | 0.77315000  | 2.45106800  | -1.14051900 |

|    |             |             |             |
|----|-------------|-------------|-------------|
| C  | 0.81092400  | 3.87824200  | -0.98141500 |
| C  | -0.32504300 | 4.23695300  | -0.31666800 |
| C  | -1.10373300 | 3.03690700  | -0.13035900 |
| C  | -2.43436800 | 3.00263300  | 0.30838300  |
| C  | -3.28857000 | 1.90923200  | 0.11567800  |
| C  | -4.72569300 | 1.92903500  | 0.26137800  |
| C  | -5.19210100 | 0.73731300  | -0.20121100 |
| C  | -4.04198700 | -0.06291000 | -0.55405400 |
| C  | -4.06809500 | -1.43052900 | -0.85433400 |
| C  | -2.92607300 | -2.24271100 | -0.84173700 |
| C  | -2.93330900 | -3.68483100 | -0.76652700 |
| C  | -1.65473500 | -4.07839300 | -0.50339000 |
| C  | -0.84062000 | -2.88788800 | -0.48242500 |
| C  | 0.55583000  | -2.86906800 | -0.38401200 |
| C  | 1.34344400  | -1.75139500 | -0.68426200 |
| C  | 2.77073600  | -1.74651400 | -0.89847300 |
| C  | 3.10350700  | -0.51273600 | -1.37542100 |
| C  | 1.89594900  | 0.27163600  | -1.38239900 |
| C  | 1.84116500  | 1.66220900  | -1.60199700 |
| H  | 1.62737400  | 4.50661700  | -1.30706800 |
| H  | -0.63419100 | 5.22875800  | -0.01925800 |
| H  | -5.30535500 | 2.76102400  | 0.63239300  |
| H  | -6.22021400 | 0.41262300  | -0.26186900 |
| H  | -3.81285600 | -4.30594800 | -0.85796200 |
| H  | -1.28215300 | -5.08458400 | -0.37263300 |
| H  | 3.43532800  | -2.57429800 | -0.70510500 |
| H  | 4.08617800  | -0.12597800 | -1.60541300 |
| Mn | -1.03191200 | 0.08201600  | -0.65810400 |
| Cl | -1.35014600 | 0.23666200  | -2.95273700 |
| O  | -0.82195500 | -0.08003100 | 1.11106500  |
| C  | -5.38124200 | -2.10154200 | -1.06454700 |
| C  | -6.30197400 | -2.28260300 | -0.02790200 |
| C  | -5.72063100 | -2.61489800 | -2.32127700 |
| C  | -7.52033600 | -2.92658200 | -0.22950200 |
| C  | -6.93050900 | -3.26941100 | -2.54457000 |
| C  | -7.83303300 | -3.42289500 | -1.49381300 |
| C  | -2.96807800 | 4.24341600  | 0.93443200  |
| C  | -2.48139800 | 4.66638700  | 2.17657600  |
| C  | -3.92670700 | 5.05289800  | 0.31709400  |
| C  | -2.93416700 | 5.83052300  | 2.79121000  |
| C  | -4.40102700 | 6.21873700  | 0.91496700  |
| C  | -3.90052200 | 6.60866500  | 2.15583500  |
| C  | 1.24033600  | -4.11133800 | 0.06239000  |
| C  | 1.11030200  | -4.51999000 | 1.39295200  |

|   |             |             |             |
|---|-------------|-------------|-------------|
| C | 2.08848900  | -4.85941700 | -0.75877900 |
| C | 1.82224900  | -5.59984000 | 1.90219900  |
| C | 2.81189100  | -5.94338300 | -0.26895500 |
| C | 2.68128400  | -6.30729300 | 1.06859600  |
| F | -6.02301100 | -1.82909200 | 1.20248500  |
| F | -8.38359900 | -3.08142700 | 0.78071700  |
| F | -8.99613400 | -4.04583300 | -1.69722500 |
| F | -7.23151500 | -3.74782400 | -3.75604500 |
| F | -4.87160900 | -2.48650300 | -3.34541900 |
| F | -4.41618000 | 4.71542800  | -0.88291600 |
| F | -5.32125700 | 6.97026300  | 0.30193300  |
| F | -4.34506000 | 7.72600700  | 2.73476700  |
| F | -2.45237500 | 6.20407800  | 3.98109500  |
| F | -1.54572000 | 3.94236200  | 2.81177100  |
| F | 2.25275300  | -4.51707000 | -2.04323300 |
| F | 0.33601300  | -3.82316300 | 2.23550800  |
| F | 1.75859400  | -5.90020300 | 3.20635000  |
| F | 3.43505400  | -7.29304000 | 1.56804800  |
| F | 3.66622200  | -6.60534500 | -1.05695500 |
| C | 2.96585500  | 2.28817700  | -2.20204900 |
| C | 3.95012700  | 2.76043400  | -2.73208400 |
| C | 5.16718800  | 3.24107500  | -3.36912300 |
| H | 5.05251700  | 3.13076100  | -4.45636000 |
| C | 5.67373200  | 4.68051400  | -3.03687800 |
| H | 4.95869400  | 5.48568800  | -3.22604300 |
| C | 6.49083700  | 2.55984900  | -2.89820700 |
| H | 6.50483600  | 1.46915000  | -2.94305000 |
| C | 7.51431000  | 3.27315000  | -3.81131800 |
| H | 8.52336200  | 3.24777900  | -3.38734900 |
| H | 7.55972200  | 2.78831900  | -4.79201300 |
| C | 6.94149200  | 4.72833300  | -3.92318200 |
| H | 7.64927200  | 5.48946900  | -3.57909600 |
| H | 6.67912300  | 4.97102500  | -4.95823700 |
| C | 6.14073500  | 4.58222700  | -1.56310800 |
| H | 6.92384500  | 5.32026000  | -1.36979900 |
| C | 6.66654200  | 3.11642100  | -1.46722600 |
| H | 7.70814800  | 3.02977100  | -1.14044200 |
| C | 5.03189400  | 4.69378300  | -0.48039700 |
| H | 4.05357900  | 4.91195100  | -0.92629000 |
| H | 5.25045900  | 5.48183800  | 0.24917700  |
| C | 5.77694100  | 2.45262400  | -0.42079800 |
| O | 5.78027800  | 1.24048800  | -0.15594600 |
| N | 5.00788200  | 3.38985100  | 0.16480900  |
| H | 4.21314400  | 3.09904200  | 0.75120800  |



|   |             |             |             |
|---|-------------|-------------|-------------|
| C | 5.17237800  | -3.01959600 | 2.09750900  |
| C | 5.04063200  | -1.69126500 | 1.69527700  |
| C | 3.93331500  | -0.93105400 | 2.09534600  |
| C | 2.91322700  | -1.49410100 | 2.90800000  |
| C | 3.06587900  | -2.84507000 | 3.30767000  |
| C | 4.16569900  | -3.58532100 | 2.91462800  |
| H | 5.79395000  | -1.22485600 | 1.06514200  |
| C | 1.80907900  | -0.68030600 | 3.26956800  |
| H | 2.29017200  | -3.30206000 | 3.91482800  |
| H | 4.25344800  | -4.62115000 | 3.23266000  |
| C | 1.70908000  | 0.66815300  | 2.87177400  |
| C | 2.77827500  | 1.22704100  | 2.00163900  |
| H | 1.01601500  | -1.11775100 | 3.86834400  |
| C | 6.36116700  | -3.84707300 | 1.65838300  |
| H | 7.10705000  | -3.19133900 | 1.19401700  |
| H | 6.84229500  | -4.28910900 | 2.54172200  |
| O | 2.74958700  | 2.39055400  | 1.56335800  |
| C | 0.65673400  | 1.51968900  | 3.21208200  |
| H | 0.69479700  | 2.52939500  | 2.81655900  |
| H | -0.05913400 | 0.45207800  | 1.40494100  |
| C | -0.50404300 | 1.11649400  | 4.06650100  |
| H | -1.17946900 | 1.95923700  | 4.22673500  |
| H | -1.07903200 | 0.31141600  | 3.58757900  |
| H | -0.17530400 | 0.74259800  | 5.04690700  |
| C | 5.99360000  | -4.97511100 | 0.67772900  |
| H | 6.89230200  | -5.50407400 | 0.34130900  |
| H | 5.33337600  | -5.71219000 | 1.14391500  |
| H | 5.48425600  | -4.57907700 | -0.20827000 |
| N | 3.81169000  | 0.38587100  | 1.69012000  |
| H | 4.52800300  | 0.74915800  | 1.03937500  |

**<sup>3</sup>TS1**

|   |             |            |             |
|---|-------------|------------|-------------|
| C | 2.04380200  | 1.39046800 | -1.21826300 |
| C | 2.66716200  | 2.68402000 | -1.33442600 |
| C | 1.71384600  | 3.60681800 | -1.02875500 |
| C | 0.49703800  | 2.87796200 | -0.75075100 |
| N | 0.72965300  | 1.53190400 | -0.87288900 |
| H | 3.69948100  | 2.84473200 | -1.60975500 |
| H | 1.81143200  | 4.68306400 | -1.02319200 |
| C | -3.45042100 | 1.18143500 | -0.35182900 |
| C | -3.23494900 | 3.41671600 | -0.15852900 |
| C | -1.94444600 | 2.78646500 | -0.33243900 |
| N | -2.10684400 | 1.42818100 | -0.43994500 |
| H | -3.40433800 | 4.47716800 | -0.04328100 |

|    |             |             |             |
|----|-------------|-------------|-------------|
| C  | 0.72616200  | -2.68617700 | -0.60703300 |
| C  | 2.01574300  | -3.30904500 | -0.77829500 |
| C  | 2.89774100  | -2.32294400 | -1.09529800 |
| C  | 2.15351900  | -1.08770800 | -1.09340900 |
| N  | 0.83880300  | -1.32293000 | -0.77203500 |
| H  | 2.21536100  | -4.36683300 | -0.68566400 |
| H  | 3.95960000  | -2.40971700 | -1.27222300 |
| C  | -1.72309100 | -2.78311800 | -0.28065700 |
| C  | -2.96286500 | -3.50690900 | -0.12613700 |
| C  | -3.96339600 | -2.58852100 | -0.17672600 |
| C  | -3.34131500 | -1.29290300 | -0.32894100 |
| N  | -1.97834900 | -1.43890200 | -0.38665000 |
| H  | -3.05166400 | -4.57678000 | -0.00519800 |
| H  | -5.02631800 | -2.76402000 | -0.09610600 |
| C  | 2.72664400  | 0.16874000  | -1.35878200 |
| C  | -4.04518300 | -0.08335800 | -0.33732800 |
| C  | -0.73246900 | 3.47389000  | -0.44405700 |
| C  | -0.45837100 | -3.37695700 | -0.34109800 |
| Mn | -0.63232000 | 0.05386700  | -0.63587700 |
| Cl | -0.96966800 | 0.02194700  | -2.90364800 |
| C  | 1.86009300  | 1.79186900  | 2.28159600  |
| C  | 2.89729900  | 2.71729500  | 2.43460400  |
| C  | 4.09598400  | 2.34360400  | 3.04495800  |
| C  | 4.27375000  | 1.03655900  | 3.50630600  |
| C  | 3.25678100  | 0.08831900  | 3.35006800  |
| C  | 2.07654900  | 0.50023000  | 2.73839500  |
| H  | 0.92528300  | 2.06591800  | 1.80792800  |
| H  | 2.74540400  | 3.72935600  | 2.07592000  |
| H  | 4.89402300  | 3.07050800  | 3.16427400  |
| H  | 5.20744100  | 0.73980800  | 3.97512200  |
| H  | 3.39733600  | -0.93180200 | 3.69454600  |
| I  | 0.46867600  | -0.91735100 | 2.47653400  |
| O  | -0.51963300 | 0.35041000  | 1.18098900  |
| C  | -0.09032000 | 5.51024800  | 0.87248900  |
| C  | -1.33554800 | 5.83420400  | -1.13505400 |
| C  | -0.04431500 | 6.88409900  | 1.08842500  |
| C  | -1.31354200 | 7.21380500  | -0.93671800 |
| C  | -0.66294300 | 7.73940500  | 0.17804900  |
| F  | 0.58153600  | 7.38568400  | 2.15967600  |
| F  | -0.63117000 | 9.05959600  | 0.37410100  |
| F  | -1.90208300 | 8.03535500  | -1.81167900 |
| F  | -1.96042400 | 5.36196900  | -2.21930000 |
| F  | 0.51580100  | 4.71175000  | 1.77176700  |
| C  | -0.73156300 | 4.94971400  | -0.23626100 |

|   |             |             |             |
|---|-------------|-------------|-------------|
| C | -0.36080300 | -4.84750600 | -0.11665900 |
| C | 0.18560100  | -5.35157500 | 1.06649100  |
| C | -0.79656800 | -5.77493100 | -1.06696500 |
| C | 0.30322400  | -6.71800400 | 1.30379400  |
| F | 0.61753200  | -4.50465900 | 2.01831100  |
| C | -0.69628000 | -7.14834500 | -0.85100900 |
| F | -1.33362000 | -5.35041600 | -2.21564300 |
| C | -0.14157900 | -7.61927500 | 0.33780000  |
| F | 0.83009600  | -7.16938000 | 2.44774800  |
| F | -1.12235900 | -8.01507600 | -1.77525000 |
| F | -0.03879400 | -8.93278300 | 0.55325800  |
| C | 4.09288500  | 0.21603600  | -1.75663700 |
| C | 5.26229600  | 0.26648500  | -2.07594400 |
| C | 6.67045400  | 0.31680200  | -2.43752400 |
| H | 6.74841200  | 0.52923400  | -3.51272800 |
| C | 7.57959500  | 1.30357500  | -1.63593700 |
| H | 7.25600400  | 2.34824600  | -1.64145900 |
| C | 7.53468300  | -0.93023800 | -2.07441100 |
| H | 7.16402400  | -1.88942600 | -2.44075800 |
| C | 8.90606100  | -0.48970300 | -2.63552400 |
| H | 9.73175200  | -1.02946300 | -2.16087700 |
| H | 8.96399900  | -0.68438000 | -3.71157900 |
| C | 8.93683600  | 1.04913800  | -2.33536800 |
| H | 9.78139200  | 1.33957100  | -1.70173700 |
| H | 9.00803900  | 1.63112200  | -3.26018900 |
| C | 7.65487400  | 0.67076800  | -0.22441600 |
| H | 8.58305000  | 0.97081600  | 0.26983600  |
| C | 7.61388800  | -0.85687900 | -0.53302100 |
| H | 8.48151200  | -1.41295600 | -0.16291100 |
| C | 6.44841700  | 0.93881700  | 0.72200400  |
| H | 5.70202000  | 1.59259400  | 0.25595900  |
| H | 6.76743300  | 1.41029900  | 1.65879100  |
| C | 6.37078200  | -1.38421800 | 0.18282100  |
| O | 5.90241300  | -2.50943700 | 0.07819600  |
| N | 5.88841800  | -0.38153300 | 0.97596800  |
| H | 4.96839400  | -0.48518500 | 1.38391100  |
| C | -4.16606000 | 2.42942900  | -0.19776900 |
| H | -5.23854400 | 2.53047200  | -0.11947000 |
| C | -5.53386600 | -0.15526700 | -0.27413400 |
| C | -6.28185500 | -0.59823500 | -1.36973200 |
| C | -6.23695400 | 0.20098500  | 0.88024200  |
| C | -7.67229400 | -0.68136100 | -1.32403300 |
| C | -7.62648800 | 0.13406800  | 0.94693200  |
| C | -8.34514500 | -0.31126500 | -0.16104300 |

|   |             |             |             |
|---|-------------|-------------|-------------|
| F | -5.57098700 | 0.62787100  | 1.96287400  |
| F | -5.66215800 | -0.96420500 | -2.49633900 |
| F | -8.27273900 | 0.48487000  | 2.06508800  |
| F | -8.36380400 | -1.10905600 | -2.38559300 |
| F | -9.67754500 | -0.38402000 | -0.10740900 |

**<sup>3</sup>TS2-S**

|    |             |             |             |
|----|-------------|-------------|-------------|
| N  | -0.52557200 | 1.99182300  | -0.58105500 |
| N  | -2.98198000 | 0.61694300  | -0.38764000 |
| N  | -1.58789700 | -1.83049700 | -0.65634200 |
| N  | 0.83954500  | -0.41624900 | -0.89776500 |
| C  | 0.63313900  | 2.52554700  | -1.08205000 |
| C  | 0.60967000  | 3.95158600  | -0.91606300 |
| C  | -0.55011200 | 4.26106600  | -0.26686000 |
| C  | -1.28353000 | 3.03077400  | -0.10039200 |
| C  | -2.61978200 | 2.94201100  | 0.31220200  |
| C  | -3.42737700 | 1.81866800  | 0.09153300  |
| C  | -4.86747400 | 1.77434000  | 0.20685600  |
| C  | -5.26712600 | 0.55803000  | -0.25349500 |
| C  | -4.07206600 | -0.19045700 | -0.57486200 |
| C  | -4.02781600 | -1.56323300 | -0.84998800 |
| C  | -2.85278100 | -2.32664200 | -0.81020400 |
| C  | -2.80015800 | -3.76855200 | -0.73450400 |
| C  | -1.50709000 | -4.10972000 | -0.46989700 |
| C  | -0.74318100 | -2.88601000 | -0.44370400 |
| C  | 0.65150800  | -2.80494000 | -0.34925300 |
| C  | 1.38683200  | -1.64927900 | -0.63940100 |
| C  | 2.81184900  | -1.58555300 | -0.86683300 |
| C  | 3.09024100  | -0.33583700 | -1.33437000 |
| C  | 1.85107000  | 0.39864800  | -1.32241700 |
| C  | 1.73775500  | 1.78517100  | -1.53703900 |
| H  | 1.40432900  | 4.61409300  | -1.22801500 |
| H  | -0.90532600 | 5.23810800  | 0.02817600  |
| H  | -5.49263000 | 2.58267300  | 0.55575500  |
| H  | -6.27725400 | 0.18451500  | -0.33306800 |
| H  | -3.65234400 | -4.42574700 | -0.83234300 |
| H  | -1.09327800 | -5.10023900 | -0.34306600 |
| H  | 3.51176600  | -2.38748600 | -0.68926900 |
| H  | 4.05448800  | 0.09103300  | -1.57163100 |
| Mn | -1.06378800 | 0.09247400  | -0.60063400 |
| Cl | -1.37055800 | 0.18001300  | -2.92162000 |
| O  | -0.95954600 | -0.13520100 | 1.10169700  |
| C  | -5.30721600 | -2.29563300 | -1.06732700 |
| C  | -6.22899600 | -2.50789100 | -0.03769900 |

|   |             |             |             |
|---|-------------|-------------|-------------|
| C | -5.61055200 | -2.83539300 | -2.32209300 |
| C | -7.41507500 | -3.20812500 | -0.24420000 |
| C | -6.78758800 | -3.54590000 | -2.55013700 |
| C | -7.69258100 | -3.72995300 | -1.50644300 |
| C | -3.20627100 | 4.14715900  | 0.95859300  |
| C | -2.75280800 | 4.54740600  | 2.22091000  |
| C | -4.18472700 | 4.93897800  | 0.35061600  |
| C | -3.25486400 | 5.67674600  | 2.86168800  |
| C | -4.70751200 | 6.06988300  | 0.97462900  |
| C | -4.23810200 | 6.43981400  | 2.23367000  |
| C | 1.39854400  | -4.02164100 | 0.06836000  |
| C | 1.30747800  | -4.46078900 | 1.39215700  |
| C | 2.27487300  | -4.71065100 | -0.77546300 |
| C | 2.07975100  | -5.51178100 | 1.87323900  |
| C | 3.06519600  | -5.75956200 | -0.31206500 |
| C | 2.96904000  | -6.15465400 | 1.01942000  |
| F | -5.98276400 | -2.03000700 | 1.19043500  |
| F | -8.28053600 | -3.39206300 | 0.75933600  |
| F | -8.82444200 | -4.40672600 | -1.71460300 |
| F | -7.05479800 | -4.04915800 | -3.75952300 |
| F | -4.75787400 | -2.67914300 | -3.33903500 |
| F | -4.64646300 | 4.61761600  | -0.86486300 |
| F | -5.64515200 | 6.80691800  | 0.37023700  |
| F | -4.72934100 | 7.52388000  | 2.83783800  |
| F | -2.80487900 | 6.03161800  | 4.06963500  |
| F | -1.80470300 | 3.83428100  | 2.84908900  |
| F | 2.40256900  | -4.34150200 | -2.05609400 |
| F | 0.51442000  | -3.81495600 | 2.26007700  |
| F | 2.04721200  | -5.83843800 | 3.17253500  |
| F | 3.77952900  | -7.10749400 | 1.49386000  |
| F | 3.94338000  | -6.36133900 | -1.12170300 |
| C | 2.83742500  | 2.45991100  | -2.13149200 |
| C | 3.80046900  | 2.96948800  | -2.66616400 |
| C | 4.98107900  | 3.50605500  | -3.32748400 |
| H | 4.83099700  | 3.42206300  | -4.41285200 |
| C | 5.44881000  | 4.95295000  | -2.97251400 |
| H | 4.69906800  | 5.73637100  | -3.11222400 |
| C | 6.34510600  | 2.86054000  | -2.92659600 |
| H | 6.39614000  | 1.77268100  | -3.00264200 |
| C | 7.30535300  | 3.63477600  | -3.85855400 |
| H | 8.33160700  | 3.63157500  | -3.47733800 |
| H | 7.32536100  | 3.18072300  | -4.85472600 |
| C | 6.68039700  | 5.07209800  | -3.90205900 |
| H | 7.37480900  | 5.84591500  | -3.55892000 |

|   |             |             |             |
|---|-------------|-------------|-------------|
| H | 6.37190000  | 5.33816300  | -4.91846200 |
| C | 5.97128600  | 4.82969800  | -1.51985600 |
| H | 6.72883100  | 5.59448400  | -1.32843100 |
| C | 6.56091800  | 3.38532400  | -1.48841800 |
| H | 7.61868600  | 3.33353000  | -1.20994400 |
| C | 4.89499900  | 4.85914600  | -0.39941800 |
| H | 3.89325800  | 5.04464600  | -0.80600000 |
| H | 5.10290600  | 5.63484300  | 0.34638000  |
| C | 5.74487000  | 2.65512800  | -0.42726100 |
| O | 5.81893900  | 1.43861000  | -0.19176300 |
| N | 4.95034900  | 3.53735400  | 0.20718600  |
| H | 4.17342000  | 3.18366600  | 0.78365200  |
| C | 5.46538900  | -2.90449300 | 2.08645400  |
| C | 5.29002900  | -1.58208600 | 1.69281700  |
| C | 4.13129900  | -0.87693200 | 2.06433600  |
| C | 3.11568000  | -1.50586500 | 2.82533400  |
| C | 3.32411900  | -2.83932100 | 3.24104400  |
| C | 4.47065500  | -3.52234200 | 2.88191100  |
| H | 6.03599000  | -1.07849700 | 1.08299200  |
| C | 1.91422900  | -0.77359400 | 3.07769400  |
| H | 2.55174800  | -3.33549300 | 3.82093600  |
| H | 4.60026000  | -4.55527900 | 3.19459700  |
| C | 1.73535200  | 0.51389000  | 2.64366800  |
| C | 2.81730800  | 1.17543900  | 1.90003600  |
| H | 1.10942700  | -1.28361300 | 3.59958200  |
| C | 6.67869400  | -3.69272500 | 1.64346100  |
| H | 7.42076400  | -3.01061400 | 1.21253900  |
| H | 7.15114100  | -4.15824000 | 2.51900600  |
| O | 2.73449200  | 2.34645500  | 1.48273300  |
| C | 0.45942800  | 1.25755700  | 2.75968200  |
| H | 0.60378000  | 2.32102100  | 2.55552200  |
| H | -0.16954700 | 0.87181000  | 1.85112800  |
| C | -0.42341100 | 0.99590800  | 3.97217100  |
| H | -1.32605600 | 1.60946800  | 3.90788000  |
| H | -0.73575200 | -0.05200100 | 4.02701600  |
| H | 0.10234000  | 1.24893700  | 4.90167300  |
| C | 6.33488200  | -4.79003100 | 0.61896700  |
| H | 7.24229900  | -5.30268300 | 0.28102400  |
| H | 5.66930400  | -5.54450000 | 1.04860300  |
| H | 5.83834700  | -4.36626900 | -0.26139600 |
| N | 3.94974600  | 0.42869200  | 1.67106400  |
| H | 4.65843600  | 0.84663400  | 1.04358800  |

|    |             |             |             |
|----|-------------|-------------|-------------|
| C  | 1.71530200  | -2.21109600 | -0.20958100 |
| C  | 3.13274800  | -2.44991600 | -0.27386100 |
| C  | 3.74414200  | -1.23772800 | -0.36506000 |
| C  | 2.70121800  | -0.24876700 | -0.34030300 |
| N  | 1.46762100  | -0.85280500 | -0.23563900 |
| H  | 3.60468700  | -3.42102000 | -0.24984000 |
| H  | 4.80428200  | -1.04051500 | -0.43900600 |
| C  | -0.03534200 | 3.08947700  | -0.13357800 |
| C  | 0.95975500  | 4.12642500  | -0.19850400 |
| C  | 2.16896900  | 3.51290600  | -0.31030200 |
| C  | 1.92229700  | 2.09881600  | -0.30860100 |
| N  | 0.57378100  | 1.85183100  | -0.19248800 |
| H  | 0.75623300  | 5.18619200  | -0.15369900 |
| H  | 3.14906700  | 3.96084000  | -0.38249100 |
| C  | -2.58593700 | -1.99203900 | 0.06705700  |
| C  | -2.82812700 | -3.41082300 | 0.04229800  |
| C  | -1.61680500 | -4.02137400 | -0.03461900 |
| C  | -0.62055000 | -2.98294200 | -0.06095700 |
| N  | -1.23016200 | -1.74728500 | 0.00278600  |
| H  | -3.80219800 | -3.87615800 | 0.06991900  |
| H  | -1.41180800 | -5.08059300 | -0.08182000 |
| C  | -3.35366900 | 0.34743700  | 0.15687600  |
| C  | -4.38664100 | 1.34333600  | 0.27061300  |
| C  | -3.77860200 | 2.55724400  | 0.21461600  |
| C  | -2.36610700 | 2.31668600  | 0.07814200  |
| N  | -2.12270800 | 0.95912600  | 0.05376700  |
| H  | -5.44050300 | 1.13635800  | 0.38352600  |
| H  | -4.24284500 | 3.53122600  | 0.25890400  |
| C  | 0.75201100  | -3.21873300 | -0.14366400 |
| C  | -1.40583600 | 3.32438100  | -0.01365200 |
| C  | 2.93953900  | 1.13301300  | -0.38702600 |
| C  | -3.59149200 | -1.02815700 | 0.14821200  |
| Mn | -0.35185500 | 0.04816500  | -0.37859700 |
| Cl | -0.57074900 | 0.01347400  | -2.71285800 |
| C  | -1.87010700 | 4.74077600  | 0.02315100  |
| C  | -2.38048700 | 5.30885700  | 1.19416300  |
| C  | -1.80900700 | 5.55459700  | -1.11270800 |
| C  | -2.82025200 | 6.62949700  | 1.24048200  |
| F  | -2.46360300 | 4.57259500  | 2.31108300  |
| C  | -2.23567800 | 6.88091800  | -1.08831800 |
| F  | -1.32221600 | 5.06556500  | -2.25787400 |
| C  | -2.74470700 | 7.41755900  | 0.09316600  |
| F  | -3.30602200 | 7.14578900  | 2.37441700  |
| F  | -2.16431700 | 7.63831900  | -2.18714200 |

|   |             |             |             |
|---|-------------|-------------|-------------|
| F | -3.15884100 | 8.68573200  | 0.12655000  |
| C | -5.00455500 | -1.49460600 | 0.23463000  |
| C | -5.48664200 | -2.14879200 | 1.37264900  |
| C | -5.90162900 | -1.29487400 | -0.82001200 |
| C | -6.80317300 | -2.59396000 | 1.46342900  |
| F | -4.66944400 | -2.36894000 | 2.41154300  |
| C | -7.22529100 | -1.72418000 | -0.74870400 |
| F | -5.49690300 | -0.66853000 | -1.92997700 |
| C | -7.67494200 | -2.37782300 | 0.39741200  |
| F | -7.23604300 | -3.21856800 | 2.56361100  |
| F | -8.06262600 | -1.51857500 | -1.76988700 |
| F | -8.93975900 | -2.79602400 | 0.47469600  |
| C | 1.21898400  | -4.63417800 | -0.16705700 |
| C | 1.78126700  | -5.19542500 | -1.31833400 |
| C | 1.11249300  | -5.45267700 | 0.96141300  |
| C | 2.22390700  | -6.51627700 | -1.34877100 |
| F | 1.91090600  | -4.45682900 | -2.42497300 |
| C | 1.54162300  | -6.77745100 | 0.95247700  |
| F | 0.57787900  | -4.96583700 | 2.09010800  |
| C | 2.10104800  | -7.30866400 | -0.20853900 |
| F | 2.75809500  | -7.02876600 | -2.46117500 |
| F | 1.42598500  | -7.53776000 | 2.04650900  |
| F | 2.51832200  | -8.57597000 | -0.22810500 |
| C | 4.28556500  | 1.59144800  | -0.47348300 |
| C | 5.42608300  | 2.00582300  | -0.49257700 |
| C | 6.77511100  | 2.55197400  | -0.50756600 |
| H | 6.83823800  | 3.27016300  | -1.33667300 |
| C | 7.28435900  | 3.22431900  | 0.81014700  |
| H | 6.64548600  | 4.01768400  | 1.20777700  |
| C | 7.97320500  | 1.55549000  | -0.57919000 |
| H | 7.94387800  | 0.83111200  | -1.39512800 |
| C | 9.15364700  | 2.55308700  | -0.61676800 |
| H | 10.08932400 | 2.08669300  | -0.29274000 |
| H | 9.31060600  | 2.92868700  | -1.63334200 |
| C | 8.68290600  | 3.69871600  | 0.34512000  |
| H | 9.36273600  | 3.84648600  | 1.19061500  |
| H | 8.60871700  | 4.65451400  | -0.18394200 |
| C | 7.49242500  | 2.03249400  | 1.77677400  |
| H | 8.24657800  | 2.28787500  | 2.52602400  |
| C | 7.96711100  | 0.89785900  | 0.81948200  |
| H | 8.95449400  | 0.49073100  | 1.05979700  |
| C | 6.22075400  | 1.47774100  | 2.48584200  |
| H | 5.32900600  | 2.06075100  | 2.22707400  |
| H | 6.33054100  | 1.48946200  | 3.57632600  |



|   |            |             |            |
|---|------------|-------------|------------|
| C | 6.94270100 | -0.22223700 | 0.97034800 |
| O | 6.88583200 | -1.23913500 | 0.29077300 |
| N | 6.10499700 | 0.11065100  | 1.99452000 |
| H | 5.27695700 | -0.44994600 | 2.15035600 |

**<sup>5</sup>INT1**

|    |             |             |             |
|----|-------------|-------------|-------------|
| C  | 2.07922800  | 1.25246100  | -1.31687300 |
| C  | 2.76257900  | 2.51296500  | -1.43305400 |
| C  | 1.86785600  | 3.48146700  | -1.08966200 |
| C  | 0.62297400  | 2.81805000  | -0.78707200 |
| N  | 0.78220300  | 1.46038000  | -0.92858600 |
| H  | 3.79352300  | 2.62378400  | -1.73661400 |
| H  | 2.02378900  | 4.55053800  | -1.07084100 |
| C  | -3.39652000 | 1.32364000  | -0.28463100 |
| C  | -3.05292600 | 3.54244900  | -0.07849600 |
| C  | -1.80438500 | 2.84916400  | -0.29247100 |
| N  | -2.04119700 | 1.50144700  | -0.39870400 |
| H  | -3.16199000 | 4.60887200  | 0.05318300  |
| C  | 0.56962900  | -2.75042900 | -0.71614300 |
| C  | 1.82558400  | -3.43753600 | -0.89227400 |
| C  | 2.75371100  | -2.49955800 | -1.22803000 |
| C  | 2.07221300  | -1.23009000 | -1.23869900 |
| N  | 0.75140800  | -1.40142000 | -0.91222200 |
| H  | 1.97398200  | -4.50230600 | -0.78488800 |
| H  | 3.81091400  | -2.63522000 | -1.39903500 |
| C  | -1.87980100 | -2.71815500 | -0.33929700 |
| C  | -3.14617700 | -3.37769300 | -0.12276300 |
| C  | -4.10398700 | -2.41355300 | -0.14157300 |
| C  | -3.42989800 | -1.15053100 | -0.33511100 |
| N  | -2.08254600 | -1.36677800 | -0.46460400 |
| H  | -3.28037700 | -4.44013500 | 0.01928600  |
| H  | -5.16874300 | -2.53635700 | -0.00690100 |
| C  | 2.69911900  | 0.00197300  | -1.49813900 |
| C  | -4.06562400 | 0.09510400  | -0.28850700 |
| C  | -0.56390600 | 3.47570200  | -0.44198100 |
| C  | -0.64608100 | -3.37330300 | -0.41500600 |
| Mn | -0.67311700 | 0.05171800  | -0.79297700 |
| Cl | -1.09655000 | 0.10055300  | -3.17517000 |
| C  | 0.18528400  | 5.49717900  | 0.84354700  |
| C  | -1.06417700 | 5.84957900  | -1.15759400 |
| C  | 0.29631600  | 6.87051200  | 1.03887200  |
| C  | -0.97700100 | 7.22939900  | -0.97934900 |
| C  | -0.29174400 | 7.74003100  | 0.12171700  |
| F  | 0.95457300  | 7.35785400  | 2.09700100  |

|   |             |             |             |
|---|-------------|-------------|-------------|
| F | -0.19793100 | 9.05979600  | 0.29817700  |
| F | -1.53702200 | 8.06473700  | -1.85949900 |
| F | -1.72257200 | 5.39019400  | -2.22649800 |
| F | 0.76063300  | 4.68305700  | 1.74753300  |
| C | -0.49033300 | 4.95205500  | -0.25167600 |
| C | -0.61613500 | -4.84164300 | -0.15863800 |
| C | -0.07014400 | -5.34702200 | 1.02405600  |
| C | -1.11773200 | -5.76636800 | -1.07886400 |
| C | -0.01449300 | -6.71199900 | 1.28982600  |
| F | 0.42329200  | -4.50272600 | 1.94909300  |
| C | -1.08030600 | -7.13817300 | -0.83400300 |
| F | -1.65841000 | -5.34013900 | -2.22463000 |
| C | -0.52378800 | -7.61051400 | 0.35346200  |
| F | 0.51411400  | -7.16388800 | 2.43250700  |
| F | -1.56832500 | -8.00208500 | -1.72925700 |
| F | -0.48094300 | -8.92229800 | 0.59615600  |
| C | 4.06206700  | -0.01241500 | -1.90444800 |
| C | 5.23833100  | -0.02725600 | -2.19976500 |
| C | 6.66345100  | -0.07685100 | -2.48275000 |
| H | 6.81617400  | -0.00814700 | -3.56843800 |
| C | 7.57241200  | 0.96204400  | -1.74983500 |
| H | 7.30728500  | 2.01109700  | -1.90850600 |
| C | 7.43311700  | -1.30541400 | -1.90545200 |
| H | 7.03522500  | -2.28552600 | -2.17544700 |
| C | 8.86064100  | -1.00478900 | -2.41718300 |
| H | 9.62258600  | -1.51299300 | -1.81749800 |
| H | 8.97954000  | -1.34323600 | -3.45179000 |
| C | 8.95447000  | 0.55732700  | -2.31739000 |
| H | 9.77308600  | 0.89160200  | -1.67152800 |
| H | 9.11224700  | 1.00754900  | -3.30302500 |
| C | 7.52747200  | 0.51329900  | -0.26759700 |
| H | 8.44329400  | 0.82485500  | 0.24233300  |
| C | 7.41268700  | -1.03748200 | -0.38413000 |
| H | 8.21941400  | -1.58436500 | 0.11523500  |
| C | 6.29023200  | 0.96337500  | 0.56285600  |
| H | 5.61053200  | 1.59124400  | -0.02577500 |
| H | 6.58247500  | 1.53206400  | 1.45286300  |
| C | 6.09789600  | -1.40118300 | 0.30869100  |
| O | 5.56595400  | -2.50307700 | 0.31677200  |
| N | 5.63958400  | -0.28183100 | 0.94221200  |
| H | 4.70583900  | -0.28610800 | 1.33094900  |
| C | -4.03661200 | 2.60556700  | -0.10281000 |
| H | -5.09981100 | 2.76389300  | 0.00051700  |
| C | -5.55237900 | 0.10242400  | -0.18058400 |

|   |             |             |             |
|---|-------------|-------------|-------------|
| C | -6.35300700 | -0.30792500 | -1.25220500 |
| C | -6.20352500 | 0.49786200  | 0.99187200  |
| C | -7.74396300 | -0.32052200 | -1.16619200 |
| C | -7.59213300 | 0.50131700  | 1.09796800  |
| C | -8.36369600 | 0.08801100  | 0.01335000  |
| F | -5.48684800 | 0.89389100  | 2.05337600  |
| F | -5.78549600 | -0.70960500 | -2.39323600 |
| F | -8.18752400 | 0.88814200  | 2.23221200  |
| F | -8.48618000 | -0.71736300 | -2.20487200 |
| F | -9.69574900 | 0.08260600  | 0.10530900  |
| O | -0.46273200 | 0.11618200  | 1.45201400  |
| I | 0.70904400  | -1.03448700 | 2.45420200  |
| C | 2.27343300  | 0.42351900  | 2.79193900  |
| C | 2.05458900  | 1.67815800  | 2.24392500  |
| C | 3.40814800  | 0.08862300  | 3.52348800  |
| C | 3.04520300  | 2.64796000  | 2.42692900  |
| H | 1.14196600  | 1.88769800  | 1.69484600  |
| C | 4.38082800  | 1.07830300  | 3.70383800  |
| H | 3.55146600  | -0.90521300 | 3.93773500  |
| C | 4.20058800  | 2.35010200  | 3.15389700  |
| H | 2.89489500  | 3.63518200  | 2.00497200  |
| H | 5.28066100  | 0.84302300  | 4.26449700  |
| H | 4.96205200  | 3.11137700  | 3.29625500  |

**<sup>5</sup>INT2**

|   |             |             |             |
|---|-------------|-------------|-------------|
| N | 0.50371000  | 1.90506800  | -0.33334700 |
| N | -2.15727000 | 0.87814100  | 0.02408700  |
| N | -1.12550600 | -1.80731500 | -0.00238800 |
| N | 1.53870000  | -0.77848500 | -0.34740600 |
| C | 1.82029200  | 2.21103200  | -0.47457200 |
| C | 1.99635500  | 3.63333700  | -0.63987800 |
| C | 0.75538500  | 4.18377000  | -0.60369400 |
| C | -0.17616900 | 3.09872300  | -0.39513300 |
| C | -1.55713200 | 3.25206200  | -0.25900900 |
| C | -2.47141600 | 2.20576400  | -0.05250500 |
| C | -3.89515200 | 2.38925500  | 0.10900100  |
| C | -4.43286800 | 1.15373900  | 0.27400000  |
| C | -3.33854800 | 0.21264000  | 0.21742200  |
| C | -3.48685200 | -1.17743400 | 0.30627200  |
| C | -2.44915600 | -2.10953200 | 0.17871700  |
| C | -2.63019800 | -3.54285100 | 0.20234100  |
| C | -1.40490300 | -4.09521200 | 0.01509100  |
| C | -0.46756400 | -3.00160900 | -0.09978200 |
| C | 0.91657000  | -3.16081800 | -0.27115800 |

|    |             |             |             |
|----|-------------|-------------|-------------|
| C  | 1.84139700  | -2.11767300 | -0.37251400 |
| C  | 3.27054800  | -2.29719300 | -0.49601400 |
| C  | 3.82408800  | -1.05765900 | -0.54591200 |
| C  | 2.72818300  | -0.12130400 | -0.45273400 |
| C  | 2.88646100  | 1.28046400  | -0.47859600 |
| H  | 2.94817600  | 4.12312900  | -0.78309600 |
| H  | 0.48801700  | 5.22388400  | -0.71656700 |
| H  | -4.40985100 | 3.33835100  | 0.09891300  |
| H  | -5.47350200 | 0.89689000  | 0.40442200  |
| H  | -3.57132600 | -4.05392900 | 0.33860700  |
| H  | -1.15445100 | -5.14367600 | -0.04539600 |
| H  | 3.78412300  | -3.24623100 | -0.53519200 |
| H  | 4.87036200  | -0.80776300 | -0.64829300 |
| Mn | -0.29831000 | 0.05136800  | -0.05475800 |
| Cl | -0.58876500 | -0.02802500 | -2.48178900 |
| O  | -0.09714200 | 0.11082300  | 1.58797500  |
| C  | -4.86481000 | -1.70294100 | 0.52797000  |
| C  | -5.52192300 | -1.50818000 | 1.74691300  |
| C  | -5.55132300 | -2.39663400 | -0.47355700 |
| C  | -6.81193100 | -1.98463100 | 1.96776900  |
| C  | -6.84060300 | -2.88470100 | -0.27311200 |
| C  | -7.47135500 | -2.67587400 | 0.95246900  |
| C  | -2.10618500 | 4.63642700  | -0.33489400 |
| C  | -1.84616800 | 5.57669400  | 0.66695800  |
| C  | -2.90143400 | 5.04202100  | -1.41172900 |
| C  | -2.35217900 | 6.87277500  | 0.60446800  |
| C  | -3.42044300 | 6.33228900  | -1.49274100 |
| C  | -3.14257700 | 7.24944400  | -0.48027000 |
| C  | 1.44493100  | -4.55308500 | -0.34590400 |
| C  | 1.43324200  | -5.39532800 | 0.77009500  |
| C  | 1.97561300  | -5.06214600 | -1.53573500 |
| C  | 1.92569200  | -6.69652400 | 0.71113000  |
| C  | 2.47567800  | -6.35997600 | -1.61644300 |
| C  | 2.44898800  | -7.17808500 | -0.48800600 |
| F  | -4.91073800 | -0.84438100 | 2.73485300  |
| F  | -7.41768500 | -1.78656100 | 3.14235800  |
| F  | -8.70631900 | -3.13777100 | 1.15392200  |
| F  | -7.47563700 | -3.54513800 | -1.24561200 |
| F  | -4.96732500 | -2.60972900 | -1.65754100 |
| F  | -3.18401600 | 4.17992300  | -2.39336700 |
| F  | -4.17685900 | 6.69620000  | -2.53214700 |
| F  | -3.63323900 | 8.48786800  | -0.54922000 |
| F  | -2.08878300 | 7.75254000  | 1.57569100  |
| F  | -1.09006300 | 5.24007100  | 1.71891700  |

|   |            |             |             |
|---|------------|-------------|-------------|
| F | 2.01426600 | -4.29604100 | -2.62991400 |
| F | 0.93605900 | -4.95477500 | 1.93260600  |
| F | 1.90381900 | -7.48130600 | 1.79286400  |
| F | 2.92405500 | -8.42255400 | -0.55521500 |
| F | 2.97548100 | -6.82492900 | -2.76460300 |
| C | 4.20207300 | 1.80342700  | -0.49520200 |
| C | 5.32145600 | 2.27259300  | -0.41585300 |
| C | 6.63005100 | 2.89071200  | -0.29057100 |
| H | 6.69341100 | 3.69214600  | -1.03942700 |
| C | 7.00320500 | 3.46024600  | 1.12117400  |
| H | 6.28488500 | 4.16794900  | 1.54323300  |
| C | 7.89603800 | 1.98250100  | -0.36875500 |
| H | 7.97050500 | 1.34137200  | -1.24892900 |
| C | 9.00262700 | 3.05318300  | -0.22891600 |
| H | 9.94556400 | 2.61709900  | 0.11511900  |
| H | 9.19821200 | 3.53654100  | -1.19187700 |
| C | 8.39172300 | 4.06582100  | 0.80066700  |
| H | 9.00299700 | 4.17181700  | 1.70269100  |
| H | 8.28465500 | 5.06271100  | 0.36068900  |
| C | 7.23140200 | 2.19358900  | 1.98215800  |
| H | 7.91723500 | 2.42294200  | 2.80198700  |
| C | 7.84354800 | 1.19166000  | 0.95769600  |
| H | 8.83840600 | 0.82341900  | 1.22747900  |
| C | 5.96044000 | 1.49123900  | 2.54733600  |
| H | 5.04710500 | 2.04557700  | 2.30055200  |
| H | 6.00837600 | 1.38963800  | 3.63737300  |
| C | 6.88859400 | 0.00156400  | 0.92516800  |
| O | 6.94955600 | -0.94187800 | 0.14707400  |
| N | 5.96021900 | 0.18210400  | 1.90711400  |
| H | 5.16629300 | -0.44400300 | 1.95814800  |

**<sup>5</sup>INT3-S**

|   |             |             |             |
|---|-------------|-------------|-------------|
| N | -0.39557900 | 2.00597800  | -0.60353900 |
| N | -2.87256800 | 0.59263100  | -0.34582200 |
| N | -1.46907400 | -1.88712000 | -0.61715000 |
| N | 1.00281500  | -0.46649400 | -0.83473400 |
| C | 0.80348600  | 2.51853800  | -0.97929300 |
| C | 0.77968400  | 3.95853000  | -0.91806600 |
| C | -0.45328900 | 4.30707000  | -0.46433500 |
| C | -1.19697000 | 3.07758400  | -0.29367900 |
| C | -2.55306500 | 3.00395700  | 0.03423200  |
| C | -3.34160000 | 1.84079500  | -0.05008500 |
| C | -4.77955100 | 1.80395800  | 0.08594600  |
| C | -5.16651800 | 0.52723500  | -0.17307200 |

|    |             |             |             |
|----|-------------|-------------|-------------|
| C  | -3.96303700 | -0.23447200 | -0.41386900 |
| C  | -3.91557400 | -1.62134400 | -0.61329900 |
| C  | -2.74165600 | -2.38628500 | -0.67372500 |
| C  | -2.69808500 | -3.83051900 | -0.69152200 |
| C  | -1.38758800 | -4.18468300 | -0.60892000 |
| C  | -0.62607300 | -2.95821800 | -0.56888100 |
| C  | 0.77839000  | -2.89199000 | -0.53160900 |
| C  | 1.53220100  | -1.72607100 | -0.69117600 |
| C  | 2.97106100  | -1.66839400 | -0.83823000 |
| C  | 3.28603000  | -0.38098400 | -1.13819600 |
| C  | 2.04478500  | 0.35786700  | -1.11995300 |
| C  | 1.94813700  | 1.75655900  | -1.30828500 |
| H  | 1.61548700  | 4.59663000  | -1.16540300 |
| H  | -0.84222400 | 5.29971500  | -0.29053800 |
| H  | -5.41044100 | 2.64693300  | 0.32398700  |
| H  | -6.17174800 | 0.13363700  | -0.18762100 |
| H  | -3.55895300 | -4.48130300 | -0.73568000 |
| H  | -0.96697200 | -5.17973800 | -0.59752700 |
| H  | 3.64721500  | -2.49974300 | -0.71181300 |
| H  | 4.26363900  | 0.05885400  | -1.27243200 |
| Mn | -0.93313600 | 0.05044000  | -0.50986800 |
| Cl | -1.21646700 | 0.14406300  | -2.93299100 |
| O  | -0.76704500 | -0.04094000 | 1.13630200  |
| C  | -5.20821900 | -2.35758300 | -0.71094100 |
| C  | -6.05859100 | -2.50030400 | 0.38956300  |
| C  | -5.60147600 | -2.95369200 | -1.91385200 |
| C  | -7.26153100 | -3.19641700 | 0.30105700  |
| C  | -6.79909100 | -3.65726100 | -2.02380700 |
| C  | -7.63066200 | -3.77678600 | -0.91147700 |
| C  | -3.21150500 | 4.27184500  | 0.45812400  |
| C  | -2.87046600 | 4.87156000  | 1.67542400  |
| C  | -4.16095100 | 4.92119000  | -0.33657700 |
| C  | -3.45717300 | 6.06238300  | 2.09633700  |
| C  | -4.76204700 | 6.11184000  | 0.06520300  |
| C  | -4.40679100 | 6.68304700  | 1.28619100  |
| C  | 1.51894700  | -4.16797600 | -0.33147400 |
| C  | 1.47806200  | -4.81598500 | 0.90649800  |
| C  | 2.30722500  | -4.73735600 | -1.33557600 |
| C  | 2.23610400  | -5.95441400 | 1.15684000  |
| C  | 3.05354400  | -5.89217000 | -1.11281600 |
| C  | 3.02042600  | -6.49556200 | 0.14218000  |
| F  | -5.72363900 | -1.95843000 | 1.56768600  |
| F  | -8.05714900 | -3.31721200 | 1.36857500  |
| F  | -8.77984900 | -4.44773000 | -1.00662800 |

|   |             |             |             |
|---|-------------|-------------|-------------|
| F | -7.15496700 | -4.21537600 | -3.18441400 |
| F | -4.81845200 | -2.85864000 | -2.99210900 |
| F | -4.51409500 | 4.39858700  | -1.51695800 |
| F | -5.66765100 | 6.71186100  | -0.71317500 |
| F | -4.97512100 | 7.82420200  | 1.67891600  |
| F | -3.11700100 | 6.61153100  | 3.26594900  |
| F | -1.95578700 | 4.30130800  | 2.47005700  |
| F | 2.37158600  | -4.16220600 | -2.54177400 |
| F | 0.71585400  | -4.32783800 | 1.89092700  |
| F | 2.26330100  | -6.50085600 | 2.37924800  |
| F | 3.78263500  | -7.56221400 | 0.39149300  |
| F | 3.81379300  | -6.40973200 | -2.08279300 |
| C | 3.08046100  | 2.41593000  | -1.83540400 |
| C | 4.08310900  | 2.90169200  | -2.32349400 |
| C | 5.31610400  | 3.37646900  | -2.93071300 |
| H | 5.21517600  | 3.25550600  | -4.01855000 |
| C | 5.82604700  | 4.81588300  | -2.60323900 |
| H | 5.11942800  | 5.62364100  | -2.81147100 |
| C | 6.62744200  | 2.68939600  | -2.43138900 |
| H | 6.63415700  | 1.59840800  | -2.46741700 |
| C | 7.66994100  | 3.38876300  | -3.33315400 |
| H | 8.67011600  | 3.36230600  | -2.88908300 |
| H | 7.73183100  | 2.89382600  | -4.30788000 |
| C | 7.10736800  | 4.84564400  | -3.47019600 |
| H | 7.81335000  | 5.60663600  | -3.12267200 |
| H | 6.86311300  | 5.07851200  | -4.51195500 |
| C | 6.26712000  | 4.72622500  | -1.12105400 |
| H | 7.05245600  | 5.46002700  | -0.92128300 |
| C | 6.77672100  | 3.25602900  | -1.00163100 |
| H | 7.80835000  | 3.15965900  | -0.64787600 |
| C | 5.13647300  | 4.85689200  | -0.06395600 |
| H | 4.17402400  | 5.10692700  | -0.52868700 |
| H | 5.35842200  | 5.63339200  | 0.67706600  |
| C | 5.84329300  | 2.60365800  | 0.01616100  |
| O | 5.81600100  | 1.39069400  | 0.27309900  |
| N | 5.06026300  | 3.54929100  | 0.56832700  |
| H | 4.21610800  | 3.26222700  | 1.09203800  |
| C | 4.71783400  | -2.88987000 | 2.56415300  |
| C | 4.72692000  | -1.56890100 | 2.12995500  |
| C | 3.62031100  | -0.73347400 | 2.36600500  |
| C | 2.47894500  | -1.21486200 | 3.04605600  |
| C | 2.47703000  | -2.56377300 | 3.45760900  |
| C | 3.56591700  | -3.38502100 | 3.22022200  |
| H | 5.59156400  | -1.15864700 | 1.61381800  |

|   |             |             |            |
|---|-------------|-------------|------------|
| C | 1.39629600  | -0.30335800 | 3.28495500 |
| H | 1.59885200  | -2.95360100 | 3.96367400 |
| H | 3.53519000  | -4.42158900 | 3.54523900 |
| C | 1.43091900  | 0.99592400  | 2.87587700 |
| C | 2.59488500  | 1.46995800  | 2.13025900 |
| H | 0.51960200  | -0.68355000 | 3.79964800 |
| C | 5.93208700  | -3.77502900 | 2.36682500 |
| H | 6.73634400  | -3.18738700 | 1.90841700 |
| H | 6.30555000  | -4.09170300 | 3.35083400 |
| O | 2.67382300  | 2.63044500  | 1.66789200 |
| C | 0.33787300  | 2.01003200  | 3.09374800 |
| H | 0.78593300  | 2.89648400  | 3.56420100 |
| H | 0.00201300  | 2.34869200  | 2.10837700 |
| C | -0.86693000 | 1.52485600  | 3.89810900 |
| H | -1.59031300 | 2.33923800  | 4.00679400 |
| H | -1.36089100 | 0.69880200  | 3.37803700 |
| H | -0.58002600 | 1.19232700  | 4.90382200 |
| C | 5.66778000  | -5.02560000 | 1.51423000 |
| H | 6.58661200  | -5.60698000 | 1.37971800 |
| H | 4.92779900  | -5.68253100 | 1.98202400 |
| H | 5.29426300  | -4.74917800 | 0.52152700 |
| N | 3.62292200  | 0.57559800  | 1.93809800 |
| H | 4.42538500  | 0.89971900  | 1.37772400 |

**<sup>5</sup>INT4-S**

|   |             |             |             |
|---|-------------|-------------|-------------|
| N | -0.39451400 | 1.96160800  | -0.61594400 |
| N | -2.91010900 | 0.69049300  | -0.37170800 |
| N | -1.65502000 | -1.79850700 | -0.69548100 |
| N | 0.84006900  | -0.50963800 | -0.93868500 |
| C | 0.78065200  | 2.43975300  | -1.13079800 |
| C | 0.82913300  | 3.86594300  | -0.96272300 |
| C | -0.30537700 | 4.22864000  | -0.29761100 |
| C | -1.09306600 | 3.03264600  | -0.12013300 |
| C | -2.42424200 | 3.00328100  | 0.31749600  |
| C | -3.28375200 | 1.91464800  | 0.12079100  |
| C | -4.72118300 | 1.94272200  | 0.25919700  |
| C | -5.19302800 | 0.75531600  | -0.20975100 |
| C | -4.04677500 | -0.05162600 | -0.55874700 |
| C | -4.07914800 | -1.41831800 | -0.86353200 |
| C | -2.94135900 | -2.23657200 | -0.84665600 |
| C | -2.95655000 | -3.67869300 | -0.76735300 |
| C | -1.68188300 | -4.07798800 | -0.49422500 |
| C | -0.86172700 | -2.89153500 | -0.47183900 |
| C | 0.53378700  | -2.87828600 | -0.36258300 |



|    |             |             |             |
|----|-------------|-------------|-------------|
| C  | 1.32837600  | -1.76437500 | -0.65910100 |
| C  | 2.75517500  | -1.76747400 | -0.87269500 |
| C  | 3.09468400  | -0.53692400 | -1.35438200 |
| C  | 1.89230500  | 0.25442200  | -1.36397700 |
| C  | 1.84467600  | 1.64415700  | -1.59068100 |
| H  | 1.65202800  | 4.48979100  | -1.28079100 |
| H  | -0.60744200 | 5.22063000  | 0.00638000  |
| H  | -5.29760100 | 2.77746700  | 0.62903700  |
| H  | -6.22300100 | 0.43792000  | -0.27695200 |
| H  | -3.83886900 | -4.29539200 | -0.86192400 |
| H  | -1.31531000 | -5.08551400 | -0.35677200 |
| H  | 3.41548200  | -2.59787600 | -0.67578600 |
| H  | 4.07963900  | -0.15674100 | -1.58602300 |
| Mn | -1.03772100 | 0.07918900  | -0.65066600 |
| Cl | -1.34350500 | 0.23349400  | -2.94584500 |
| O  | -0.84379100 | -0.07481500 | 1.12412500  |
| C  | -5.39460700 | -2.08177100 | -1.08232900 |
| C  | -6.32378800 | -2.25721500 | -0.05222300 |
| C  | -5.72778300 | -2.59404100 | -2.34122300 |
| C  | -7.54424300 | -2.89447100 | -0.26234200 |
| C  | -6.93965600 | -3.24185300 | -2.57294400 |
| C  | -7.85059400 | -3.38969800 | -1.52864300 |
| C  | -2.95188500 | 4.24432000  | 0.94829600  |
| C  | -2.46502300 | 4.65662100  | 2.19400200  |
| C  | -3.90353000 | 5.06341100  | 0.33311300  |
| C  | -2.91082800 | 5.82092000  | 2.81345200  |
| C  | -4.37091400 | 6.22942200  | 0.93606800  |
| C  | -3.87035400 | 6.60912500  | 2.18010800  |
| C  | 1.21160800  | -4.12134000 | 0.09205200  |
| C  | 1.08243700  | -4.51715000 | 1.42643300  |
| C  | 2.05553000  | -4.87926400 | -0.72414400 |
| C  | 1.79151700  | -5.59487100 | 1.94406200  |
| C  | 2.77533000  | -5.96193600 | -0.22620000 |
| C  | 2.64578300  | -6.31328100 | 1.11484700  |
| F  | -6.05110200 | -1.80499400 | 1.18003400  |
| F  | -8.41553700 | -3.04403800 | 0.74168900  |
| F  | -9.01563000 | -4.00618300 | -1.74013100 |
| F  | -7.23455800 | -3.71917100 | -3.78630800 |
| F  | -4.87067500 | -2.47091600 | -3.35927900 |
| F  | -4.39286500 | 4.73529100  | -0.86966800 |
| F  | -5.28464900 | 6.99057800  | 0.32513000  |
| F  | -4.30833300 | 7.72648200  | 2.76397100  |
| F  | -2.42919400 | 6.18474700  | 4.00645300  |
| F  | -1.53675600 | 3.92193500  | 2.82639500  |

|   |            |             |             |
|---|------------|-------------|-------------|
| F | 2.21993000 | -4.54702300 | -2.01125500 |
| F | 0.31260600 | -3.80914400 | 2.26363200  |
| F | 1.73004400 | -5.88271500 | 3.25100400  |
| F | 3.39663200 | -7.29744700 | 1.62156000  |
| F | 3.62587800 | -6.63395800 | -1.00967700 |
| C | 2.96993800 | 2.26036100  | -2.19934300 |
| C | 3.95203300 | 2.72048400  | -2.74404400 |
| C | 5.16330000 | 3.18343200  | -3.40496200 |
| H | 5.02970100 | 3.06060400  | -4.48872500 |
| C | 5.68776100 | 4.62241800  | -3.09962800 |
| H | 4.97666800 | 5.43145500  | -3.28714700 |
| C | 6.48866600 | 2.49644200  | -2.94747300 |
| H | 6.49245700 | 1.40519000  | -2.97866800 |
| C | 7.50290900 | 3.18912800  | -3.88632600 |
| H | 8.51852400 | 3.16034100  | -3.47856800 |
| H | 7.52809300 | 2.69148200  | -4.86131600 |
| C | 6.94075900 | 4.64769600  | -4.00752400 |
| H | 7.66067000 | 5.40695700  | -3.68515900 |
| H | 6.66314100 | 4.87937500  | -5.04112300 |
| C | 6.17835400 | 4.53851100  | -1.63275200 |
| H | 6.97092700 | 5.27189500  | -1.46161200 |
| C | 6.69257300 | 3.06924200  | -1.52675800 |
| H | 7.73836700 | 2.97698800  | -1.21528800 |
| C | 5.08791500 | 4.67357600  | -0.53421600 |
| H | 4.10473700 | 4.89587300  | -0.96744900 |
| H | 5.32526700 | 5.46820600  | 0.18225000  |
| C | 5.81291200 | 2.42633200  | -0.45902300 |
| O | 5.80811500 | 1.21736700  | -0.18031800 |
| N | 5.06169500 | 3.37775800  | 0.12687000  |
| H | 4.27155200 | 3.10079400  | 0.72621600  |
| C | 5.15976300 | -3.01998500 | 2.11005100  |
| C | 5.04503500 | -1.69089300 | 1.70350900  |
| C | 3.94667000 | -0.91626200 | 2.09861300  |
| C | 2.91729300 | -1.46296500 | 2.91023200  |
| C | 3.05196000 | -2.81484900 | 3.31360700  |
| C | 4.14397600 | -3.57004200 | 2.92598000  |
| H | 5.80537500 | -1.23590400 | 1.07339600  |
| C | 1.82164600 | -0.63508900 | 3.26607000  |
| H | 2.26954300 | -3.26038400 | 3.92073900  |
| H | 4.21823400 | -4.60545800 | 3.24882100  |
| C | 1.73810100 | 0.71687400  | 2.86719400  |
| C | 2.81831100 | 1.25646300  | 1.99443200  |
| H | 1.02121800 | -1.06604600 | 3.85930200  |
| C | 6.34041900 | -3.86258400 | 1.67751200  |

|   |             |             |             |
|---|-------------|-------------|-------------|
| H | 7.09208700  | -3.21779600 | 1.20712700  |
| H | 6.81829900  | -4.30120100 | 2.56436800  |
| O | 2.80713200  | 2.41831200  | 1.55092700  |
| C | 0.70788900  | 1.59552900  | 3.20170500  |
| H | 0.76116800  | 2.59031000  | 2.77104400  |
| H | -0.00325400 | 0.33384700  | 1.39967600  |
| C | -0.48495500 | 1.25585500  | 4.03521100  |
| H | -0.88449900 | 2.15104300  | 4.52061800  |
| H | -1.28267300 | 0.84524500  | 3.39811700  |
| H | -0.26303900 | 0.50934700  | 4.80620800  |
| C | 5.96267100  | -4.99592900 | 0.70699000  |
| H | 6.85664400  | -5.53475200 | 0.37355300  |
| H | 5.29768900  | -5.72407400 | 1.18038100  |
| H | 5.45487800  | -4.60349000 | -0.18154500 |
| N | 3.84049100  | 0.40090900  | 1.68734900  |
| H | 4.56029800  | 0.75200700  | 1.03418600  |

**<sup>5</sup>TS1**

|   |             |             |             |
|---|-------------|-------------|-------------|
| C | 2.02283500  | 1.38259100  | -1.22530900 |
| C | 2.64511900  | 2.67370800  | -1.35110000 |
| C | 1.70157900  | 3.60202700  | -1.03045400 |
| C | 0.48679600  | 2.88274000  | -0.73314400 |
| N | 0.71125100  | 1.53475800  | -0.85944500 |
| H | 3.67460800  | 2.82907200  | -1.63924700 |
| H | 1.80476100  | 4.67764300  | -1.02206300 |
| C | -3.46052600 | 1.19094400  | -0.31630200 |
| C | -3.22826900 | 3.42408400  | -0.09900900 |
| C | -1.94256400 | 2.79623900  | -0.28093400 |
| N | -2.11101000 | 1.43704100  | -0.39501400 |
| H | -3.39319800 | 4.48384100  | 0.02785100  |
| C | 0.70304300  | -2.68223500 | -0.61578700 |
| C | 1.99269300  | -3.31153800 | -0.77450200 |
| C | 2.88150400  | -2.33174100 | -1.09433400 |
| C | 2.14046600  | -1.09446800 | -1.11065100 |
| N | 0.82709800  | -1.32784100 | -0.80330200 |
| H | 2.18688400  | -4.36940100 | -0.67218900 |
| H | 3.94480100  | -2.42285800 | -1.26067000 |
| C | -1.75526400 | -2.77000600 | -0.32698400 |
| C | -2.99599300 | -3.49169500 | -0.16132700 |
| C | -3.99822900 | -2.57549000 | -0.20905900 |
| C | -3.37896800 | -1.27991500 | -0.37161600 |
| N | -2.02133300 | -1.43042000 | -0.45461500 |
| H | -3.08263400 | -4.56047700 | -0.03063400 |
| H | -5.06006900 | -2.74992000 | -0.11436900 |

|    |             |             |             |
|----|-------------|-------------|-------------|
| C  | 2.70881400  | 0.16426700  | -1.37630300 |
| C  | -4.07249100 | -0.06534800 | -0.34044800 |
| C  | -0.73394300 | 3.48428700  | -0.40727300 |
| C  | -0.49061800 | -3.36503200 | -0.36160400 |
| Mn | -0.66528200 | 0.06208600  | -0.66071600 |
| Cl | -0.96933300 | 0.00690100  | -3.03523000 |
| C  | 1.88900900  | 1.74867300  | 2.26670300  |
| C  | 2.87784800  | 2.73412500  | 2.34880200  |
| C  | 4.10853600  | 2.45512200  | 2.94620800  |
| C  | 4.36469000  | 1.18474300  | 3.46840900  |
| C  | 3.39443200  | 0.18021800  | 3.38723600  |
| C  | 2.17915500  | 0.49375100  | 2.78355500  |
| H  | 0.92811500  | 1.94317500  | 1.80474300  |
| H  | 2.66694500  | 3.71856900  | 1.94702400  |
| H  | 4.86907000  | 3.22801800  | 3.00918100  |
| H  | 5.32195600  | 0.96184900  | 3.93093400  |
| H  | 3.59368300  | -0.81037000 | 3.78492700  |
| I  | 0.64575300  | -1.01405700 | 2.64704800  |
| O  | -0.49156300 | 0.10276700  | 1.27962000  |
| C  | -0.09928000 | 5.53622000  | 0.88953600  |
| C  | -1.33625400 | 5.83304300  | -1.12856400 |
| C  | -0.05576800 | 6.91306700  | 1.08746300  |
| C  | -1.31645600 | 7.21507400  | -0.94811700 |
| C  | -0.67120800 | 7.75545100  | 0.16288800  |
| F  | 0.56358600  | 7.42942800  | 2.15494100  |
| F  | -0.64192900 | 9.07780100  | 0.34182500  |
| F  | -1.90263400 | 8.02448700  | -1.83551100 |
| F  | -1.95728800 | 5.34473700  | -2.20753700 |
| F  | 0.50076900  | 4.74865700  | 1.80051700  |
| C  | -0.73390800 | 4.96189200  | -0.21552400 |
| C  | -0.40242600 | -4.83601900 | -0.13356000 |
| C  | 0.12936500  | -5.34571600 | 1.05384900  |
| C  | -0.83275400 | -5.75878600 | -1.09136300 |
| C  | 0.23774200  | -6.71374500 | 1.28766900  |
| F  | 0.55567900  | -4.50506700 | 2.01225700  |
| C  | -0.74125800 | -7.13317300 | -0.87868100 |
| F  | -1.35584900 | -5.32796900 | -2.24398000 |
| C  | -0.20117800 | -7.61009200 | 0.31453200  |
| F  | 0.75046200  | -7.17084200 | 2.43545200  |
| F  | -1.16178100 | -7.99490300 | -1.80988000 |
| F  | -0.10696100 | -8.92448300 | 0.52715000  |
| C  | 4.07184100  | 0.21468900  | -1.78222400 |
| C  | 5.23917000  | 0.26057400  | -2.10936200 |
| C  | 6.64366100  | 0.30152600  | -2.48537400 |

|   |             |             |             |
|---|-------------|-------------|-------------|
| H | 6.71043300  | 0.50511000  | -3.56302400 |
| C | 7.56758000  | 1.28886400  | -1.70167500 |
| H | 7.25037200  | 2.33545900  | -1.71165700 |
| C | 7.50386800  | -0.94824200 | -2.12189500 |
| H | 7.12311700  | -1.90775500 | -2.47685600 |
| C | 8.87161100  | -0.52059000 | -2.70168200 |
| H | 9.69908400  | -1.06129000 | -2.23127600 |
| H | 8.91673700  | -0.72477400 | -3.77657300 |
| C | 8.91487400  | 1.02052400  | -2.41502700 |
| H | 9.76844400  | 1.31136500  | -1.79384200 |
| H | 8.97847800  | 1.59422800  | -3.34556100 |
| C | 7.65575600  | 0.66648600  | -0.28632300 |
| H | 8.59214900  | 0.96385100  | 0.19381400  |
| C | 7.60024600  | -0.86315500 | -0.58224300 |
| H | 8.46787200  | -1.42256800 | -0.21721300 |
| C | 6.46359900  | 0.95042200  | 0.67314700  |
| H | 5.71637500  | 1.60730300  | 0.21257000  |
| H | 6.79738300  | 1.42547700  | 1.60275100  |
| C | 6.36194700  | -1.37584900 | 0.15291400  |
| O | 5.88555700  | -2.49935800 | 0.06315100  |
| N | 5.89624600  | -0.36347000 | 0.94210300  |
| H | 4.98733600  | -0.45891800 | 1.37648300  |
| C | -4.16406100 | 2.43981400  | -0.15115700 |
| H | -5.23624000 | 2.54602400  | -0.07883800 |
| C | -5.56042700 | -0.12614300 | -0.27215300 |
| C | -6.31358000 | -0.56479700 | -1.36656000 |
| C | -6.25895400 | 0.22980700  | 0.88562400  |
| C | -7.70411900 | -0.64290000 | -1.31666100 |
| C | -7.64849800 | 0.16802300  | 0.95586600  |
| C | -8.37208200 | -0.27254800 | -0.15089000 |
| F | -5.58870600 | 0.65106900  | 1.96745000  |
| F | -5.69878900 | -0.93066500 | -2.49548100 |
| F | -8.28996200 | 0.51853000  | 2.07655000  |
| F | -8.40017900 | -1.06570900 | -2.37683300 |
| F | -9.70426200 | -0.34034700 | -0.09343200 |

**<sup>5</sup>TS2-s**

|   |             |             |             |
|---|-------------|-------------|-------------|
| N | -0.53168900 | 1.99560700  | -0.56229400 |
| N | -3.00123800 | 0.61691900  | -0.41993600 |
| N | -1.60047000 | -1.81118300 | -0.63037700 |
| N | 0.82876600  | -0.41476700 | -0.90415400 |
| C | 0.63000100  | 2.53284800  | -1.04567100 |
| C | 0.61070400  | 3.95706000  | -0.86439800 |
| C | -0.55871200 | 4.26166000  | -0.22792300 |

|    |             |             |             |
|----|-------------|-------------|-------------|
| C  | -1.29172400 | 3.02843600  | -0.08351800 |
| C  | -2.63844200 | 2.93794000  | 0.30527400  |
| C  | -3.44576900 | 1.82263400  | 0.06142900  |
| C  | -4.88704100 | 1.78103600  | 0.17109900  |
| C  | -5.28846900 | 0.56592900  | -0.28851200 |
| C  | -4.09233700 | -0.18532500 | -0.60251100 |
| C  | -4.04367400 | -1.56303000 | -0.85424800 |
| C  | -2.86719800 | -2.31837800 | -0.78039700 |
| C  | -2.80818500 | -3.75558500 | -0.68048300 |
| C  | -1.51375700 | -4.09019600 | -0.40866100 |
| C  | -0.74943800 | -2.87068100 | -0.40537700 |
| C  | 0.64321600  | -2.79407300 | -0.32846100 |
| C  | 1.37983200  | -1.64133400 | -0.63782000 |
| C  | 2.80538000  | -1.57853500 | -0.85972300 |
| C  | 3.08433300  | -0.32724000 | -1.32308800 |
| C  | 1.84244600  | 0.40446300  | -1.31600400 |
| C  | 1.73363400  | 1.79383900  | -1.51083300 |
| H  | 1.40936100  | 4.62174700  | -1.16122000 |
| H  | -0.91800000 | 5.23626600  | 0.07009500  |
| H  | -5.51134200 | 2.59001900  | 0.51978800  |
| H  | -6.29878100 | 0.19311300  | -0.36864400 |
| H  | -3.65751800 | -4.41746600 | -0.77143500 |
| H  | -1.10072400 | -5.07864500 | -0.26495300 |
| H  | 3.50592600  | -2.37836600 | -0.67532100 |
| H  | 4.04965600  | 0.10258100  | -1.55104000 |
| Mn | -1.09033500 | 0.08222100  | -0.63970300 |
| Cl | -1.34056300 | 0.25633700  | -2.95120700 |
| O  | -0.98703200 | -0.11163400 | 1.11706500  |
| C  | -5.31770800 | -2.30385700 | -1.07248400 |
| C  | -6.25150200 | -2.49945700 | -0.05034200 |
| C  | -5.60438000 | -2.86792100 | -2.32050400 |
| C  | -7.43345800 | -3.20626300 | -0.25842900 |
| C  | -6.77684900 | -3.58539200 | -2.54985100 |
| C  | -7.69427200 | -3.75209000 | -1.51406600 |
| C  | -3.22898400 | 4.13736900  | 0.95887600  |
| C  | -2.78445000 | 4.52334000  | 2.22900300  |
| C  | -4.20028200 | 4.93796500  | 0.35099600  |
| C  | -3.28952000 | 5.64710200  | 2.87724800  |
| C  | -4.72549000 | 6.06357100  | 0.98241000  |
| C  | -4.26578300 | 6.41903000  | 2.24916100  |
| C  | 1.39213200  | -4.01051500 | 0.08576700  |
| C  | 1.31097800  | -4.45198700 | 1.40947600  |
| C  | 2.26224300  | -4.69846600 | -0.76575100 |
| C  | 2.08614600  | -5.50473400 | 1.88231900  |

|   |             |             |             |
|---|-------------|-------------|-------------|
| C | 3.05593900  | -5.74816400 | -0.31034400 |
| C | 2.96959600  | -6.14567300 | 1.02112100  |
| F | -6.02127400 | -1.99861600 | 1.17158900  |
| F | -8.31067200 | -3.37371100 | 0.73761100  |
| F | -8.82184300 | -4.43542800 | -1.72345900 |
| F | -7.02781600 | -4.11191100 | -3.75274100 |
| F | -4.73911200 | -2.72896100 | -3.32956900 |
| F | -4.65262200 | 4.63069200  | -0.87176500 |
| F | -5.65622500 | 6.80927800  | 0.37787300  |
| F | -4.75954400 | 7.49789000  | 2.86056700  |
| F | -2.84872300 | 5.98850900  | 4.09238700  |
| F | -1.84269400 | 3.80219100  | 2.85644000  |
| F | 2.37906400  | -4.32823100 | -2.04706400 |
| F | 0.52481300  | -3.80806100 | 2.28477400  |
| F | 2.06311200  | -5.83394700 | 3.18110800  |
| F | 3.78344000  | -7.09935400 | 1.48790600  |
| F | 3.92718700  | -6.34915000 | -1.12795000 |
| C | 2.83212200  | 2.47209200  | -2.10239600 |
| C | 3.79113100  | 2.98322800  | -2.64327500 |
| C | 4.96307700  | 3.51921300  | -3.32023100 |
| H | 4.79406600  | 3.43962100  | -4.40319200 |
| C | 5.44156100  | 4.96326300  | -2.96831800 |
| H | 4.69213200  | 5.74959900  | -3.09235400 |
| C | 6.33161500  | 2.86764700  | -2.94542000 |
| H | 6.37754700  | 1.77991800  | -3.02620500 |
| C | 7.27811100  | 3.64214500  | -3.89104900 |
| H | 8.31076800  | 3.63411100  | -3.52762800 |
| H | 7.27936300  | 3.19171300  | -4.88906200 |
| C | 6.65736100  | 5.08167800  | -3.91848400 |
| H | 7.36015900  | 5.85188000  | -3.58443600 |
| H | 6.33236400  | 5.35260700  | -4.92843700 |
| C | 5.98823200  | 4.83284500  | -1.52530900 |
| H | 6.75120700  | 5.59459800  | -1.34365700 |
| C | 6.57368000  | 3.38644500  | -1.50927500 |
| H | 7.63574100  | 3.32999000  | -1.24870500 |
| C | 4.93050900  | 4.86116400  | -0.38733000 |
| H | 3.92292700  | 5.05257700  | -0.77653100 |
| H | 5.15358500  | 5.63243700  | 0.35866300  |
| C | 5.77225400  | 2.65439500  | -0.43834600 |
| O | 5.84565700  | 1.43649100  | -0.20961500 |
| N | 4.99034200  | 3.53623000  | 0.21191300  |
| H | 4.22021900  | 3.18207200  | 0.79733700  |
| C | 5.49841800  | -2.91777200 | 2.05758900  |
| C | 5.32484500  | -1.59310700 | 1.67009000  |

|   |             |             |             |
|---|-------------|-------------|-------------|
| C | 4.17070800  | -0.88591400 | 2.05114100  |
| C | 3.15662300  | -1.51522700 | 2.81474600  |
| C | 3.36469600  | -2.85046100 | 3.22582900  |
| C | 4.50718200  | -3.53524200 | 2.85799400  |
| H | 6.06881900  | -1.08965100 | 1.05771600  |
| C | 1.95788300  | -0.78248800 | 3.07431400  |
| H | 2.59497500  | -3.34561100 | 3.81007300  |
| H | 4.63630400  | -4.56935100 | 3.16704300  |
| C | 1.77938800  | 0.50929600  | 2.64887200  |
| C | 2.86321300  | 1.17219900  | 1.90724300  |
| H | 1.15346700  | -1.29321000 | 3.59598100  |
| C | 6.70506100  | -3.70910900 | 1.60264700  |
| H | 7.44656000  | -3.02873200 | 1.16803800  |
| H | 7.18239000  | -4.17972300 | 2.47281400  |
| O | 2.78564700  | 2.34759800  | 1.50200200  |
| C | 0.50711000  | 1.25517000  | 2.77560700  |
| H | 0.65791200  | 2.31992800  | 2.58203300  |
| H | -0.12846500 | 0.87757000  | 1.87447100  |
| C | -0.36455100 | 0.99114800  | 3.99751700  |
| H | -1.26719100 | 1.60579300  | 3.94166100  |
| H | -0.68025100 | -0.05582100 | 4.05048700  |
| H | 0.16791500  | 1.23991600  | 4.92441600  |
| C | 6.34784200  | -4.80141300 | 0.57726700  |
| H | 7.25000400  | -5.31752400 | 0.23063000  |
| H | 5.68168700  | -5.55381100 | 1.00967000  |
| H | 5.84654600  | -4.37223500 | -0.29773300 |
| N | 3.99135300  | 0.42253000  | 1.66664900  |
| H | 4.69780300  | 0.84201700  | 1.03790400  |

**<sup>5</sup>TS3-S**

|   |             |             |             |
|---|-------------|-------------|-------------|
| N | -0.55998700 | 2.06683000  | -0.84111900 |
| N | -2.94959300 | 0.58694200  | -0.45270500 |
| N | -1.48850900 | -1.80015800 | -0.70593800 |
| N | 0.87786600  | -0.33179700 | -1.18650000 |
| C | 0.58282200  | 2.62683700  | -1.33348200 |
| C | 0.54110900  | 4.05187800  | -1.13330000 |
| C | -0.61011300 | 4.32477300  | -0.45528700 |
| C | -1.31583400 | 3.07436900  | -0.30223200 |
| C | -2.62447900 | 2.94270800  | 0.17562100  |
| C | -3.40513100 | 1.79172300  | 0.01338800  |
| C | -4.83478500 | 1.71356000  | 0.19921600  |
| C | -5.22357300 | 0.47133300  | -0.20156400 |
| C | -4.02687800 | -0.25270000 | -0.56145300 |
| C | -3.94949300 | -1.62981600 | -0.80224700 |



|    |             |             |             |
|----|-------------|-------------|-------------|
| C  | -2.74633000 | -2.34676300 | -0.80966100 |
| C  | -2.63612600 | -3.78199400 | -0.76397000 |
| C  | -1.31639900 | -4.08116300 | -0.58921200 |
| C  | -0.59460700 | -2.83551300 | -0.58756400 |
| C  | 0.80316600  | -2.71739400 | -0.59404200 |
| C  | 1.47996500  | -1.54224700 | -0.94217100 |
| C  | 2.89373100  | -1.42818700 | -1.21882800 |
| C  | 3.11222100  | -0.16875200 | -1.68396100 |
| C  | 1.84905000  | 0.52507100  | -1.62191500 |
| C  | 1.70197900  | 1.91412400  | -1.80092700 |
| H  | 1.31695200  | 4.73554100  | -1.44689100 |
| H  | -0.97592900 | 5.28700900  | -0.12595100 |
| H  | -5.46288000 | 2.51785200  | 0.55339300  |
| H  | -6.22529700 | 0.06790400  | -0.21824300 |
| H  | -3.46750700 | -4.46955500 | -0.82527000 |
| H  | -0.86233400 | -5.05885000 | -0.51212300 |
| H  | 3.62584200  | -2.20584300 | -1.07131700 |
| H  | 4.05282600  | 0.28882600  | -1.94875000 |
| Mn | -1.03466700 | 0.13566500  | -0.80765600 |
| Cl | -1.47335500 | 0.15545300  | -3.11159300 |
| O  | -0.70530800 | 0.19340500  | 1.00309300  |
| C  | -5.21271300 | -2.40762900 | -0.93978700 |
| C  | -6.07076600 | -2.62636600 | 0.14193700  |
| C  | -5.56852800 | -2.97727500 | -2.16714500 |
| C  | -7.24569100 | -3.36279900 | 0.01331700  |
| C  | -6.73518900 | -3.72473500 | -2.31786800 |
| C  | -7.57630600 | -3.91499400 | -1.22300800 |
| C  | -3.21857900 | 4.12117200  | 0.86492200  |
| C  | -2.78343100 | 4.46347100  | 2.14948600  |
| C  | -4.19486900 | 4.93094400  | 0.27983400  |
| C  | -3.29441100 | 5.56529800  | 2.83031400  |
| C  | -4.72596000 | 6.03542600  | 0.94330400  |
| C  | -4.27016300 | 6.35343000  | 2.22157800  |
| C  | 1.59996000  | -3.91404600 | -0.21360500 |
| C  | 1.50618200  | -4.41729500 | 1.08876600  |
| C  | 2.50326500  | -4.54617200 | -1.07529800 |
| C  | 2.29761500  | -5.47089800 | 1.53173500  |
| C  | 3.32994900  | -5.58022400 | -0.64311700 |
| C  | 3.23259100  | -6.03437700 | 0.66981600  |
| F  | -5.77133000 | -2.11788000 | 1.34670600  |
| F  | -8.04948400 | -3.55198300 | 1.06596000  |
| F  | -8.69758900 | -4.62688300 | -1.35729200 |
| F  | -7.05340100 | -4.25719400 | -3.50191100 |
| F  | -4.77746700 | -2.81554700 | -3.23161600 |

|   |             |             |             |
|---|-------------|-------------|-------------|
| F | -4.64820900 | 4.64845200  | -0.94806700 |
| F | -5.66093600 | 6.79381800  | 0.36159900  |
| F | -4.77009100 | 7.41106300  | 2.86458200  |
| F | -2.86244700 | 5.86865000  | 4.05892200  |
| F | -1.85087000 | 3.71689900  | 2.76179900  |
| F | 2.61468700  | -4.14286900 | -2.34785200 |
| F | 0.66825400  | -3.84963800 | 1.96904300  |
| F | 2.21871900  | -5.89361300 | 2.79983900  |
| F | 4.06459600  | -6.98267100 | 1.11338400  |
| F | 4.22046200  | -6.13278700 | -1.47415700 |
| C | 2.81170500  | 2.63387000  | -2.32056800 |
| C | 3.81181800  | 3.18916400  | -2.72498400 |
| C | 5.06629700  | 3.77705700  | -3.16831900 |
| H | 5.06620600  | 3.82156400  | -4.26613000 |
| C | 5.48572800  | 5.16352900  | -2.58377100 |
| H | 4.76580000  | 5.97293600  | -2.73229500 |
| C | 6.35846400  | 3.06196000  | -2.65954300 |
| H | 6.41609000  | 1.98944800  | -2.85578000 |
| C | 7.44262800  | 3.91908900  | -3.35302400 |
| H | 8.40549000  | 3.85201300  | -2.83639800 |
| H | 7.60016200  | 3.58226600  | -4.38294000 |
| C | 6.83497200  | 5.36409100  | -3.31504700 |
| H | 7.47792900  | 6.07974700  | -2.79238600 |
| H | 6.67159500  | 5.75054700  | -4.32653300 |
| C | 5.80275500  | 4.86320000  | -1.09748800 |
| H | 6.53274900  | 5.58432900  | -0.71985700 |
| C | 6.37478900  | 3.41287400  | -1.15379100 |
| H | 7.38553700  | 3.31074400  | -0.74477600 |
| C | 4.58799300  | 4.78939000  | -0.13050100 |
| H | 3.64856800  | 5.03307100  | -0.64151500 |
| H | 4.69747100  | 5.47869900  | 0.71458400  |
| C | 5.42622500  | 2.58521700  | -0.28971500 |
| O | 5.46726800  | 1.35096400  | -0.17505900 |
| N | 4.56363700  | 3.41075800  | 0.33279000  |
| H | 3.73921200  | 3.01579200  | 0.80730400  |
| C | 5.10442200  | -3.07243900 | 2.03107400  |
| C | 4.85919700  | -1.77753800 | 1.57557700  |
| C | 3.76659100  | -1.04667600 | 2.06432900  |
| C | 2.88032800  | -1.61243200 | 3.02073200  |
| C | 3.17240800  | -2.91089900 | 3.50181800  |
| C | 4.25881700  | -3.61860400 | 3.02244000  |
| H | 5.50169200  | -1.32075200 | 0.82661200  |
| C | 1.73143300  | -0.87090600 | 3.40180900  |
| H | 2.50009900  | -3.36497000 | 4.22434200  |

|   |             |             |            |
|---|-------------|-------------|------------|
| H | 4.44071400  | -4.62954100 | 3.37693800 |
| C | 1.44511200  | 0.39047600  | 2.86508800 |
| C | 2.42873400  | 1.00109000  | 1.93474300 |
| H | 1.04063100  | -1.32505800 | 4.10687000 |
| C | 6.25882300  | -3.88911000 | 1.49425400 |
| H | 5.92696200  | -4.92452700 | 1.33501500 |
| H | 6.56159900  | -3.50203100 | 0.51355700 |
| O | 2.30053900  | 2.14642700  | 1.46896400 |
| C | 0.26948700  | 1.11743800  | 3.07664100 |
| H | 0.20912200  | 2.08456800  | 2.59273600 |
| H | -0.98145200 | -0.65286100 | 1.39791100 |
| C | -0.85953200 | 0.73099800  | 3.97250000 |
| H | -0.96605200 | -0.35365100 | 4.08744200 |
| H | -0.72452000 | 1.15266700  | 4.98103700 |
| H | -1.79732500 | 1.13393800  | 3.57833200 |
| C | 7.47152100  | -3.88739000 | 2.44241200 |
| H | 7.19862500  | -4.29060100 | 3.42420400 |
| H | 8.28742700  | -4.49676300 | 2.03740400 |
| H | 7.84402400  | -2.86796400 | 2.59234700 |
| N | 3.51579500  | 0.23326200  | 1.60511300 |
| H | 4.18141100  | 0.64225200  | 0.93013900 |

**MECP-1**

|   |             |             |             |
|---|-------------|-------------|-------------|
| N | -0.37258500 | 1.99876100  | -0.56975700 |
| N | -2.84707500 | 0.58760300  | -0.34627500 |
| N | -1.44712400 | -1.90851600 | -0.56612300 |
| N | 1.00583000  | -0.48278200 | -0.82504500 |
| C | 0.81752100  | 2.51114800  | -0.96889400 |
| C | 0.79411300  | 3.95350600  | -0.92631500 |
| C | -0.43396200 | 4.30515600  | -0.46188800 |
| C | -1.17257400 | 3.07334900  | -0.27301600 |
| C | -2.53276300 | 2.99864500  | 0.03935900  |
| C | -3.32094800 | 1.83395000  | -0.05573700 |
| C | -4.76101900 | 1.79961100  | 0.05887400  |
| C | -5.14435500 | 0.52236600  | -0.20665800 |
| C | -3.93645300 | -0.23908300 | -0.42768200 |
| C | -3.88893300 | -1.63002300 | -0.60826100 |
| C | -2.71880600 | -2.40358100 | -0.64434500 |
| C | -2.68431100 | -3.84992300 | -0.66825900 |
| C | -1.37616200 | -4.21038500 | -0.57472800 |
| C | -0.61351000 | -2.98278000 | -0.52366800 |
| C | 0.79208300  | -2.91189500 | -0.50685000 |
| C | 1.53976400  | -1.74289800 | -0.68420700 |
| C | 2.97551000  | -1.68435300 | -0.84704000 |

|    |             |             |             |
|----|-------------|-------------|-------------|
| C  | 3.28587400  | -0.39734600 | -1.15873900 |
| C  | 2.04588100  | 0.34053500  | -1.12699800 |
| C  | 1.95277500  | 1.74159100  | -1.31215500 |
| H  | 1.62419900  | 4.59110300  | -1.19400100 |
| H  | -0.82275300 | 5.29924600  | -0.29536300 |
| H  | -5.39591800 | 2.64139300  | 0.29126500  |
| H  | -6.14969000 | 0.12928400  | -0.23349800 |
| H  | -3.54698500 | -4.49745400 | -0.72650300 |
| H  | -0.96060000 | -5.20778000 | -0.56557400 |
| H  | 3.65586200  | -2.51209300 | -0.71860900 |
| H  | 4.26246100  | 0.04128500  | -1.30429200 |
| Mn | -0.89826300 | 0.03848400  | -0.44306900 |
| Cl | -1.23021400 | 0.11577400  | -2.83488300 |
| O  | -0.79290700 | -0.03026300 | 1.13772100  |
| C  | -5.18473200 | -2.36210400 | -0.71188700 |
| C  | -6.04264800 | -2.49800900 | 0.38340800  |
| C  | -5.57310400 | -2.96113400 | -1.91465300 |
| C  | -7.24746000 | -3.19039600 | 0.29033200  |
| C  | -6.77227700 | -3.66146500 | -2.02944100 |
| C  | -7.61117400 | -3.77429500 | -0.92203800 |
| C  | -3.20028900 | 4.26989000  | 0.44004400  |
| C  | -2.88128400 | 4.88291300  | 1.65640800  |
| C  | -4.13468200 | 4.91190500  | -0.37825600 |
| C  | -3.47417200 | 6.07853000  | 2.05442000  |
| C  | -4.74166000 | 6.10742200  | -0.00018200 |
| C  | -4.40814500 | 6.69157000  | 1.22076900  |
| C  | 1.53686900  | -4.18775000 | -0.32403800 |
| C  | 1.49637100  | -4.85318300 | 0.90466400  |
| C  | 2.32150000  | -4.74717900 | -1.33676500 |
| C  | 2.25449600  | -5.99442300 | 1.14007000  |
| C  | 3.06689700  | -5.90565800 | -1.12985300 |
| C  | 3.03745000  | -6.52364800 | 0.11808200  |
| F  | -5.71376100 | -1.95242400 | 1.56197400  |
| F  | -8.05032600 | -3.30408900 | 1.35347500  |
| F  | -8.76207700 | -4.44207200 | -1.02175600 |
| F  | -7.12263600 | -4.22299000 | -3.19029000 |
| F  | -4.78346400 | -2.87306200 | -2.98894700 |
| F  | -4.46630100 | 4.37832100  | -1.55987100 |
| F  | -5.63197900 | 6.70022500  | -0.80153400 |
| F  | -4.98213800 | 7.83757000  | 1.59094100  |
| F  | -3.15463400 | 6.63945400  | 3.22451500  |
| F  | -1.98179800 | 4.32054700  | 2.47477500  |
| F  | 2.38172800  | -4.16058600 | -2.53767300 |
| F  | 0.73417700  | -4.37950400 | 1.89688700  |

|   |            |             |             |
|---|------------|-------------|-------------|
| F | 2.28598600 | -6.55266400 | 2.35732100  |
| F | 3.80064900 | -7.59260100 | 0.35382000  |
| F | 3.82267100 | -6.41299700 | -2.10878700 |
| C | 3.08643700 | 2.39683400  | -1.84338300 |
| C | 4.09007200 | 2.88260800  | -2.32922000 |
| C | 5.32793200 | 3.35615800  | -2.92776100 |
| H | 5.24298100 | 3.21922700  | -4.01504000 |
| C | 5.82560900 | 4.80264800  | -2.61346400 |
| H | 5.11758800 | 5.60350800  | -2.84251800 |
| C | 6.63580700 | 2.68339500  | -2.40060700 |
| H | 6.64897900 | 1.59205400  | -2.42154200 |
| C | 7.68747600 | 3.37613600  | -3.29696000 |
| H | 8.68121700 | 3.36200900  | -2.83806800 |
| H | 7.76645900 | 2.86781100  | -4.26353100 |
| C | 7.11866100 | 4.82761600  | -3.46296400 |
| H | 7.81551000 | 5.59768100  | -3.11696300 |
| H | 6.88749500 | 5.04384200  | -4.51128600 |
| C | 6.24709100 | 4.73632700  | -1.12425900 |
| H | 7.02673300 | 5.47625900  | -0.92474400 |
| C | 6.76142400 | 3.27031400  | -0.97693100 |
| H | 7.78827900 | 3.18415700  | -0.60690300 |
| C | 5.10250800 | 4.87744000  | -0.08367000 |
| H | 4.14453800 | 5.11346900  | -0.56464500 |
| H | 5.31027800 | 5.66735600  | 0.64717200  |
| C | 5.81724900 | 2.62859500  | 0.03788100  |
| O | 5.78989700 | 1.41905900  | 0.31054600  |
| N | 5.02659400 | 3.57988900  | 0.56905100  |
| H | 4.18161400 | 3.30003100  | 1.09451300  |
| C | 4.66446500 | -2.85314700 | 2.56760500  |
| C | 4.67557600 | -1.53195900 | 2.13391200  |
| C | 3.56503400 | -0.69885500 | 2.35851000  |
| C | 2.41808300 | -1.18342600 | 3.02615700  |
| C | 2.41367000 | -2.53226400 | 3.43639900  |
| C | 3.50664000 | -3.35124900 | 3.21036400  |
| H | 5.54482300 | -1.11945000 | 1.62761100  |
| C | 1.33424500 | -0.27139800 | 3.26125800  |
| H | 1.53107100 | -2.92394600 | 3.93331000  |
| H | 3.47381100 | -4.38828500 | 3.53388300  |
| C | 1.37566200 | 1.03150400  | 2.86337800  |
| C | 2.54884700 | 1.51061600  | 2.13180700  |
| H | 0.45628700 | -0.65198300 | 3.77425700  |
| C | 5.88361900 | -3.73448800 | 2.38354400  |
| H | 6.68855600 | -3.14548800 | 1.92815500  |
| H | 6.25130600 | -4.04458600 | 3.37181300  |

|   |             |             |            |
|---|-------------|-------------|------------|
| O | 2.63728400  | 2.67744100  | 1.69122400 |
| C | 0.29263100  | 2.05329300  | 3.09865600 |
| H | 0.75363200  | 2.92934600  | 3.57541000 |
| H | -0.04724300 | 2.41072700  | 2.12151200 |
| C | -0.90819600 | 1.57353000  | 3.91252400 |
| H | -1.62323300 | 2.39295800  | 4.03436500 |
| H | -1.41942900 | 0.75297500  | 3.40013300 |
| H | -0.61203800 | 1.23171900  | 4.91217600 |
| C | 5.63110000  | -4.99021800 | 1.53502800 |
| H | 6.55487500  | -5.56469600 | 1.40511700 |
| H | 4.89512600  | -5.65131600 | 2.00336800 |
| H | 5.25784000  | -4.72023600 | 0.54049700 |
| N | 3.57215600  | 0.61215700  | 1.93545800 |
| H | 4.38302100  | 0.93825600  | 1.38745600 |

**MECP-2**

|   |             |             |             |
|---|-------------|-------------|-------------|
| N | -0.32337000 | 1.92911800  | -0.54749300 |
| N | -2.87580600 | 0.71873200  | -0.31852200 |
| N | -1.69362200 | -1.80256400 | -0.74048700 |
| N | 0.84137100  | -0.57457600 | -0.91642700 |
| C | 0.86997800  | 2.37839500  | -1.04746600 |
| C | 0.95849900  | 3.80181200  | -0.86959300 |
| C | -0.17618200 | 4.19393800  | -0.22417800 |
| C | -1.00012800 | 3.01944400  | -0.06377400 |
| C | -2.33799600 | 3.02917600  | 0.35332500  |
| C | -3.21905100 | 1.95552000  | 0.16755300  |
| C | -4.65423200 | 2.01851700  | 0.30959500  |
| C | -5.15665900 | 0.84311300  | -0.15632200 |
| C | -4.03342500 | 0.00800900  | -0.51078700 |
| C | -4.10852600 | -1.34995800 | -0.84576800 |
| C | -2.99366700 | -2.19958700 | -0.87438400 |
| C | -3.05150000 | -3.64251900 | -0.81783600 |
| C | -1.78653000 | -4.08301400 | -0.56680600 |
| C | -0.93201600 | -2.92109000 | -0.53379800 |
| C | 0.46120600  | -2.94868100 | -0.40648200 |
| C | 1.29106400  | -1.85053200 | -0.66209500 |
| C | 2.71984500  | -1.88701800 | -0.85151300 |
| C | 3.10052400  | -0.65579800 | -1.30009800 |
| C | 1.92093700  | 0.16812000  | -1.31093000 |
| C | 1.91516000  | 1.56225200  | -1.51272800 |
| H | 1.80570600  | 4.40235400  | -1.16755000 |
| H | -0.45307100 | 5.19256200  | 0.08102500  |
| H | -5.20866600 | 2.86628500  | 0.68296100  |
| H | -6.19462600 | 0.55333600  | -0.22190600 |

|    |             |             |             |
|----|-------------|-------------|-------------|
| H  | -3.95324800 | -4.23079900 | -0.90845700 |
| H  | -1.44769900 | -5.10258600 | -0.44761800 |
| H  | 3.35416300  | -2.73829600 | -0.65912600 |
| H  | 4.09932900  | -0.29790600 | -1.50803300 |
| Mn | -1.02392500 | 0.06065100  | -0.62499900 |
| Cl | -1.31964600 | 0.28964200  | -2.91701800 |
| O  | -0.84495800 | -0.19830200 | 1.14759700  |
| C  | -5.44541500 | -1.97350800 | -1.05138800 |
| C  | -6.37269200 | -2.11377600 | -0.01361800 |
| C  | -5.80346100 | -2.48638600 | -2.30354400 |
| C  | -7.61465100 | -2.71215000 | -0.21091200 |
| C  | -7.03610600 | -3.09870700 | -2.52181500 |
| C  | -7.94500600 | -3.20817600 | -1.47075200 |
| C  | -2.85325600 | 4.30414700  | 0.92577800  |
| C  | -2.35679400 | 4.78349200  | 2.14342200  |
| C  | -3.79653100 | 5.10130700  | 0.26819400  |
| C  | -2.78604700 | 5.98597900  | 2.69799800  |
| C  | -4.24795400 | 6.30480000  | 0.80634500  |
| C  | -3.73885800 | 6.74874000  | 2.02535600  |
| C  | 1.09902600  | -4.21095300 | 0.05337100  |
| C  | 0.93677200  | -4.60253600 | 1.38571900  |
| C  | 1.94852400  | -4.98222100 | -0.74391900 |
| C  | 1.62153000  | -5.68692400 | 1.92109600  |
| C  | 2.64292300  | -6.07347900 | -0.22862100 |
| C  | 2.48207000  | -6.41928800 | 1.11041100  |
| F  | -6.07797300 | -1.66396300 | 1.21446100  |
| F  | -8.48330500 | -2.82542400 | 0.80016000  |
| F  | -9.13002300 | -3.78972300 | -1.66944400 |
| F  | -7.35306800 | -3.57872300 | -3.72855000 |
| F  | -4.94977400 | -2.39969700 | -3.32854500 |
| F  | -4.29068600 | 4.71830400  | -0.91609300 |
| F  | -5.15355700 | 7.04175700  | 0.15508700  |
| F  | -4.16031300 | 7.90291400  | 2.54595300  |
| F  | -2.29215000 | 6.41056600  | 3.86560100  |
| F  | -1.42579500 | 4.08349900  | 2.80898800  |
| F  | 2.14786600  | -4.65213500 | -2.02653300 |
| F  | 0.16103800  | -3.88080500 | 2.20565200  |
| F  | 1.53297300  | -5.96633100 | 3.22808900  |
| F  | 3.21082900  | -7.41054400 | 1.63456900  |
| F  | 3.50214700  | -6.75715000 | -0.99216400 |
| C  | 3.05510500  | 2.15692900  | -2.11703200 |
| C  | 4.03831800  | 2.60212000  | -2.67273600 |
| C  | 5.24303600  | 3.03758200  | -3.36550000 |
| H  | 5.08447400  | 2.89223200  | -4.44326400 |

|   |             |             |             |
|---|-------------|-------------|-------------|
| C | 5.79480000  | 4.47602300  | -3.10660900 |
| H | 5.09117400  | 5.29109400  | -3.29645600 |
| C | 6.56832300  | 2.34257600  | -2.92096700 |
| H | 6.55629500  | 1.25090300  | -2.92767800 |
| C | 7.57176400  | 2.99907900  | -3.89713400 |
| H | 8.59550000  | 2.96622100  | -3.51033400 |
| H | 7.56943600  | 2.47810600  | -4.86002600 |
| C | 7.02694100  | 4.46198500  | -4.04240600 |
| H | 7.76381600  | 5.21848200  | -3.75351500 |
| H | 6.73040900  | 4.67295500  | -5.07508100 |
| C | 6.31988700  | 4.42031400  | -1.65071100 |
| H | 7.13021900  | 5.14212600  | -1.51761300 |
| C | 6.80839300  | 2.94420200  | -1.51826100 |
| H | 7.85715800  | 2.83876900  | -1.22173500 |
| C | 5.25775900  | 4.60591100  | -0.53345900 |
| H | 4.27144800  | 4.84297100  | -0.95209900 |
| H | 5.52850000  | 5.41028400  | 0.15999100  |
| C | 5.93353200  | 2.34476400  | -0.42090900 |
| O | 5.90536400  | 1.14267300  | -0.11513100 |
| N | 5.21498800  | 3.32610900  | 0.15598500  |
| H | 4.43207600  | 3.08440300  | 0.78025100  |
| C | 5.02773200  | -3.07571700 | 2.12145000  |
| C | 4.98631000  | -1.73619500 | 1.73443200  |
| C | 3.90747200  | -0.92151900 | 2.10192800  |
| C | 2.82274400  | -1.43848500 | 2.85786400  |
| C | 2.88117700  | -2.80127600 | 3.23936700  |
| C | 3.95737200  | -3.59533900 | 2.88495200  |
| H | 5.79074400  | -1.30429100 | 1.14370300  |
| C | 1.75366100  | -0.56557300 | 3.19489500  |
| H | 2.05675600  | -3.22227700 | 3.80734300  |
| H | 3.97810600  | -4.63618800 | 3.19783200  |
| C | 1.75913300  | 0.80312000  | 2.84675500  |
| C | 2.89640600  | 1.31163700  | 2.03254100  |
| H | 0.91644700  | -0.97216900 | 3.75394600  |
| C | 6.19258300  | -3.95934400 | 1.72886500  |
| H | 6.97541600  | -3.34348400 | 1.27084900  |
| H | 6.63352900  | -4.39951000 | 2.63427000  |
| O | 2.96522100  | 2.48796800  | 1.63611500  |
| C | 0.76461600  | 1.72116000  | 3.18485600  |
| H | 0.88822600  | 2.73274700  | 2.81307800  |
| H | 0.08297200  | -0.04656600 | 1.40460300  |
| C | -0.51180700 | 1.36770200  | 3.86436700  |
| H | -0.97929200 | 2.24533900  | 4.31598600  |
| H | -1.21421000 | 0.95945300  | 3.11555700  |



|   |             |             |             |
|---|-------------|-------------|-------------|
| H | -0.38622900 | 0.59789400  | 4.63511200  |
| C | 5.80582000  | -5.09393500 | 0.76336200  |
| H | 6.69240400  | -5.65247000 | 0.44301400  |
| H | 5.12315100  | -5.80654200 | 1.23537400  |
| H | 5.31451500  | -4.69975500 | -0.13365500 |
| N | 3.87550900  | 0.40838000  | 1.71748100  |
| H | 4.63003800  | 0.73707400  | 1.09238200  |

**PhI**

|   |             |             |             |
|---|-------------|-------------|-------------|
| C | 0.58219200  | -0.00001800 | 0.00000200  |
| C | 1.26536100  | 1.21608700  | 0.00000000  |
| C | 2.66286600  | 1.20738800  | 0.00000200  |
| C | 3.36346000  | 0.00000600  | -0.00000200 |
| C | 2.66290000  | -1.20737200 | -0.00000100 |
| C | 1.26537100  | -1.21608800 | 0.00000300  |
| H | 0.72349600  | 2.15553800  | 0.00000500  |
| H | 3.19999000  | 2.15209500  | -0.00000200 |
| H | 4.44969700  | 0.00003200  | -0.00000100 |
| H | 3.20000600  | -2.15208900 | -0.00000600 |
| H | 0.72355100  | -2.15556600 | 0.00000600  |
| I | -1.56810600 | 0.00000000  | 0.00000000  |

**PhIO**

|   |             |             |             |
|---|-------------|-------------|-------------|
| O | -1.76020300 | 1.60692500  | 0.00039000  |
| I | -1.41347100 | -0.27171000 | -0.00007800 |
| C | 0.76484300  | -0.15350900 | 0.00009200  |
| C | 1.24666100  | 1.14447500  | -0.00005100 |
| C | 1.57971100  | -1.27762100 | 0.00018300  |
| C | 2.63248600  | 1.32538600  | -0.00013000 |
| H | 0.54066000  | 1.97488000  | -0.00013100 |
| C | 2.96427600  | -1.07631900 | 0.00012800  |
| H | 1.16737100  | -2.28303700 | 0.00053900  |
| C | 3.48734000  | 0.21946900  | -0.00009100 |
| H | 3.04274200  | 2.33161500  | -0.00012100 |
| H | 3.62922700  | -1.93574700 | 0.00022100  |
| H | 4.56368600  | 0.36623000  | -0.00031100 |

**Pro-S**

|   |             |             |             |
|---|-------------|-------------|-------------|
| O | 4.13714500  | -0.10802100 | 1.24830000  |
| C | -3.05226500 | 0.06632100  | -0.34245000 |
| C | -2.01906900 | -0.86622000 | -0.36400000 |
| C | -0.68762000 | -0.45942300 | -0.18863400 |
| C | -0.37160600 | 0.90513100  | 0.01195400  |
| C | -1.42825900 | 1.83627300  | 0.03050300  |

|   |             |             |             |
|---|-------------|-------------|-------------|
| C | -2.73980100 | 1.42810300  | -0.14255300 |
| H | -2.24044700 | -1.92047400 | -0.51790400 |
| C | 1.01147700  | 1.26240100  | 0.17941100  |
| H | -1.19543900 | 2.88765000  | 0.18001500  |
| H | -3.54292400 | 2.16033500  | -0.12771500 |
| C | 2.01546800  | 0.34713000  | 0.14853200  |
| C | 1.70010300  | -1.07316900 | -0.04507200 |
| H | 1.25023400  | 2.31406300  | 0.33158900  |
| C | -4.49362700 | -0.37257000 | -0.47626700 |
| H | -5.04562900 | 0.36173400  | -1.07677200 |
| H | -4.54384300 | -1.32409900 | -1.01960200 |
| O | 2.53993300  | -1.98313100 | -0.06932400 |
| C | 3.48725600  | 0.70587700  | 0.28248300  |
| H | 3.55500200  | 1.73051500  | 0.66829300  |
| H | 3.98175200  | -1.02667700 | 0.95468600  |
| C | 4.19929500  | 0.63728100  | -1.07823100 |
| H | 4.12471700  | -0.37527300 | -1.48771000 |
| H | 3.75848300  | 1.33918200  | -1.79611100 |
| H | 5.25770400  | 0.88263100  | -0.94373700 |
| C | -5.18055200 | -0.52784900 | 0.89330300  |
| H | -5.16415600 | 0.41745200  | 1.44726900  |
| H | -6.22509800 | -0.83702000 | 0.77450100  |
| H | -4.66651500 | -1.27938500 | 1.50286900  |
| N | 0.35419500  | -1.36889800 | -0.20578700 |
| H | 0.15537900  | -2.35485100 | -0.33484300 |

**Sub**

|   |             |             |             |
|---|-------------|-------------|-------------|
| C | -2.72354000 | -0.12933100 | -0.33217200 |
| C | -1.77519400 | 0.88840500  | -0.27318800 |
| C | -0.40862600 | 0.58698000  | -0.16537500 |
| C | 0.02908100  | -0.75743400 | -0.11514800 |
| C | -0.94216700 | -1.77465200 | -0.17674200 |
| C | -2.28958200 | -1.47053400 | -0.28286600 |
| H | -2.09097300 | 1.92920600  | -0.31162000 |
| C | 1.44264800  | -1.01223200 | -0.00759000 |
| H | -0.61527900 | -2.81123400 | -0.14348400 |
| H | -3.02499300 | -2.26955200 | -0.33155000 |
| C | 2.36644100  | -0.01654700 | 0.04851000  |
| C | 1.92779600  | 1.38997200  | -0.00225700 |
| H | 1.75910000  | -2.05176500 | 0.02893100  |
| C | -4.20047000 | 0.19281100  | -0.39279300 |
| H | -4.34733700 | 1.18233000  | -0.84301500 |
| H | -4.70653100 | -0.52825900 | -1.04748200 |
| O | 2.68716600  | 2.35566300  | 0.04229900  |

|   |             |             |             |
|---|-------------|-------------|-------------|
| C | 3.85689600  | -0.21209600 | 0.16214000  |
| H | 4.33111500  | 0.31211700  | -0.67880500 |
| H | 4.20233400  | 0.33586200  | 1.04942400  |
| C | 4.33286700  | -1.66399300 | 0.21754900  |
| H | 3.91461100  | -2.19286400 | 1.08241400  |
| H | 4.04707600  | -2.21701700 | -0.68528700 |
| H | 5.42395300  | -1.70311400 | 0.29980500  |
| C | -4.85748300 | 0.16189800  | 0.99959800  |
| H | -4.39011800 | 0.89585200  | 1.66565500  |
| H | -5.92762200 | 0.38913100  | 0.93400600  |
| H | -4.74455900 | -0.82532600 | 1.46164000  |
| N | 0.55045200  | 1.57966600  | -0.10788900 |
| H | 0.26671800  | 2.55219200  | -0.14179900 |

**<sup>3</sup>INT4-R**

|   |             |             |             |
|---|-------------|-------------|-------------|
| N | -0.58686700 | 1.98851900  | -0.54539700 |
| N | -2.98812200 | 0.49383100  | -0.32163100 |
| N | -1.52700400 | -1.88290200 | -0.62918200 |
| N | 0.86469800  | -0.38481400 | -0.81459300 |
| C | 0.57120900  | 2.55634200  | -1.00218300 |
| C | 0.50772100  | 3.98207800  | -0.82551100 |
| C | -0.68122300 | 4.25637800  | -0.21589500 |
| C | -1.38688700 | 3.00479900  | -0.08374800 |
| C | -2.72281100 | 2.86446500  | 0.30301300  |
| C | -3.47397600 | 1.69995400  | 0.10822800  |
| C | -4.91423800 | 1.63230000  | 0.17089000  |
| C | -5.27618200 | 0.39552700  | -0.26936000 |
| C | -4.05908000 | -0.33446200 | -0.53601800 |
| C | -3.97530800 | -1.70311300 | -0.81885200 |
| C | -2.77419000 | -2.42301500 | -0.78287100 |
| C | -2.67442000 | -3.86273900 | -0.71490800 |
| C | -1.37109800 | -4.16187600 | -0.45604500 |
| C | -0.64859200 | -2.91285600 | -0.42421400 |
| C | 0.74190900  | -2.79355600 | -0.32676600 |
| C | 1.44478500  | -1.61151800 | -0.58790200 |
| C | 2.86553500  | -1.50627300 | -0.81278600 |
| C | 3.11318500  | -0.23795300 | -1.24867500 |
| C | 1.85831400  | 0.46532900  | -1.22390000 |
| C | 1.71036600  | 1.85007500  | -1.42766600 |
| H | 1.29804000  | 4.66596900  | -1.10028900 |
| H | -1.06235900 | 5.22001100  | 0.08945300  |
| H | -5.56006500 | 2.44575000  | 0.46956800  |
| H | -6.27567700 | 0.00132300  | -0.37838900 |
| H | -3.50555000 | -4.54655700 | -0.81081700 |

|    |             |             |             |
|----|-------------|-------------|-------------|
| H  | -0.92432700 | -5.13821000 | -0.33239400 |
| H  | 3.58449200  | -2.29460900 | -0.65194500 |
| H  | 4.06685100  | 0.21753100  | -1.47545700 |
| Mn | -1.06509500 | 0.04842600  | -0.56380100 |
| Cl | -1.33541000 | 0.16425800  | -2.86821100 |
| O  | -0.90549500 | -0.07778900 | 1.21352600  |
| C  | -5.22919800 | -2.47158800 | -1.05245500 |
| C  | -6.17245800 | -2.68556400 | -0.04227700 |
| C  | -5.48863900 | -3.04278400 | -2.30353300 |
| C  | -7.33635900 | -3.41743600 | -0.26489400 |
| C  | -6.64241700 | -3.78521400 | -2.54694700 |
| C  | -7.56949400 | -3.97018600 | -1.52292600 |
| C  | -3.42030800 | 4.04998000  | 0.87637200  |
| C  | -3.68492600 | 4.11569900  | 2.24718300  |
| C  | -3.83955800 | 5.12366700  | 0.08680300  |
| C  | -4.33796700 | 5.20521500  | 2.81865300  |
| C  | -4.49254800 | 6.22573500  | 0.63524800  |
| C  | -4.74400900 | 6.26254100  | 2.00591300  |
| C  | 1.52440700  | -4.00263100 | 0.04656800  |
| C  | 1.46950200  | -4.48091200 | 1.35823400  |
| C  | 2.39124700  | -4.65143100 | -0.83753400 |
| C  | 2.26689600  | -5.53511000 | 1.78911000  |
| C  | 3.20338200  | -5.70454100 | -0.42556200 |
| C  | 3.14416200  | -6.13949800 | 0.89566500  |
| F  | -5.96926400 | -2.17956800 | 1.18210100  |
| F  | -8.22247200 | -3.60240900 | 0.72001500  |
| F  | -8.67963400 | -4.67726200 | -1.74594200 |
| F  | -6.86693900 | -4.31739900 | -3.75259900 |
| F  | -4.61458000 | -2.88565800 | -3.30256300 |
| F  | -3.60853100 | 5.11180200  | -1.23171600 |
| F  | -4.88276300 | 7.24198100  | -0.14130100 |
| F  | -5.37018000 | 7.31297800  | 2.54106500  |
| F  | -4.57499500 | 5.24532000  | 4.13381400  |
| F  | -3.29764000 | 3.11419700  | 3.05065800  |
| F  | 2.48592600  | -4.23841700 | -2.10780300 |
| F  | 0.68427000  | -3.87516000 | 2.26001900  |
| F  | 2.26916800  | -5.90146100 | 3.07788800  |
| F  | 3.98015500  | -7.09263600 | 1.32235100  |
| F  | 4.07078700  | -6.26895300 | -1.27285900 |
| C  | 2.79766300  | 2.56129400  | -2.00243100 |
| C  | 3.74548300  | 3.10889300  | -2.52653900 |
| C  | 4.90996200  | 3.68673600  | -3.18147400 |
| H  | 4.75642000  | 3.62175600  | -4.26764600 |
| C  | 5.34704200  | 5.13636800  | -2.79916600 |

|   |             |             |             |
|---|-------------|-------------|-------------|
| H | 4.57971200  | 5.90570700  | -2.92039300 |
| C | 6.28885000  | 3.06330300  | -2.79846200 |
| H | 6.36314300  | 1.97859200  | -2.89706000 |
| C | 7.22914000  | 3.87733200  | -3.71681600 |
| H | 8.25602100  | 3.89008600  | -3.33750400 |
| H | 7.25734400  | 3.44340400  | -4.72169900 |
| C | 6.57164000  | 5.30067900  | -3.73113000 |
| H | 7.24974500  | 6.08366900  | -3.37645700 |
| H | 6.25270300  | 5.57832500  | -4.74118900 |
| C | 5.87925200  | 4.99607500  | -1.35166400 |
| H | 6.62352000  | 5.77115500  | -1.15003000 |
| C | 6.49636200  | 3.56278800  | -1.35072700 |
| H | 7.55529400  | 3.52625500  | -1.07408100 |
| C | 4.80988900  | 4.98508900  | -0.22425500 |
| H | 3.80185400  | 5.15610300  | -0.62222400 |
| H | 5.00609800  | 5.75263600  | 0.53301200  |
| C | 5.69856500  | 2.79704000  | -0.30055700 |
| O | 5.79135500  | 1.57745100  | -0.09101000 |
| N | 4.89790100  | 3.65497500  | 0.35878900  |
| H | 4.15287000  | 3.28460300  | 0.96452400  |
| C | 5.55630200  | -2.82994900 | 1.94733400  |
| C | 5.32896600  | -1.49148100 | 1.62791100  |
| C | 4.18571900  | -0.83192400 | 2.09844900  |
| C | 3.22406400  | -1.50895400 | 2.89433500  |
| C | 3.48103400  | -2.86355500 | 3.22239900  |
| C | 4.61639400  | -3.50389500 | 2.76203000  |
| H | 6.03076400  | -0.94221200 | 1.00505700  |
| C | 2.06572900  | -0.80153800 | 3.29656100  |
| H | 2.75557000  | -3.40344200 | 3.82347500  |
| H | 4.78195800  | -4.54735200 | 3.01855500  |
| C | 1.84168800  | 0.55474300  | 2.96544200  |
| C | 2.87333300  | 1.24215700  | 2.14391900  |
| H | 1.31077600  | -1.32654700 | 3.87674000  |
| C | 6.77002600  | -3.56046700 | 1.41534700  |
| H | 7.45980900  | -2.83848000 | 0.96267900  |
| H | 7.31041700  | -4.02673400 | 2.25064100  |
| O | 2.78211200  | 2.43036800  | 1.78762800  |
| C | 0.67951800  | 1.21678200  | 3.37312300  |
| H | -0.03782100 | 0.25395200  | 1.50943800  |
| C | 6.41799000  | -4.64717900 | 0.38310300  |
| H | 7.32632000  | -5.11129000 | -0.01718600 |
| H | 5.81111500  | -5.44101400 | 0.82852700  |
| H | 5.85542700  | -4.22618900 | -0.45803100 |
| N | 3.96195300  | 0.49446500  | 1.77940500  |

|   |             |            |            |
|---|-------------|------------|------------|
| H | 4.63583500  | 0.94775100 | 1.13982000 |
| C | 0.25847800  | 2.62639100 | 3.09473000 |
| H | 0.79772800  | 3.33466600 | 3.74188400 |
| H | 0.48335300  | 2.92860600 | 2.07045400 |
| H | -0.81318200 | 2.74164500 | 3.28006000 |
| H | -0.00522800 | 0.61980700 | 3.97298000 |

**<sup>5</sup>INT4-R**

|    |             |             |             |
|----|-------------|-------------|-------------|
| N  | -0.62481200 | 2.00670800  | -0.58456700 |
| N  | -3.00000100 | 0.47530000  | -0.33759700 |
| N  | -1.50408100 | -1.88314000 | -0.62931900 |
| N  | 0.86424200  | -0.35031900 | -0.82088300 |
| C  | 0.52923100  | 2.58713600  | -1.03168400 |
| C  | 0.45234700  | 4.01181500  | -0.84606300 |
| C  | -0.73939800 | 4.27060200  | -0.23588700 |
| C  | -1.43325700 | 3.01097200  | -0.11292300 |
| C  | -2.76581000 | 2.85223700  | 0.27862200  |
| C  | -3.50127800 | 1.67693900  | 0.08754300  |
| C  | -4.94008400 | 1.58921900  | 0.15335900  |
| C  | -5.28582700 | 0.34490200  | -0.27925900 |
| C  | -4.05948300 | -0.36960800 | -0.54390300 |
| C  | -3.95595600 | -1.73928000 | -0.81531100 |
| C  | -2.74455800 | -2.44140900 | -0.77510500 |
| C  | -2.62512100 | -3.87913400 | -0.69698500 |
| C  | -1.31711400 | -4.15889200 | -0.44090900 |
| C  | -0.61131400 | -2.90000900 | -0.42057600 |
| C  | 0.77789300  | -2.76133400 | -0.33043000 |
| C  | 1.46227000  | -1.56992100 | -0.59826200 |
| C  | 2.87912700  | -1.44712100 | -0.83518400 |
| C  | 3.10723500  | -0.17633100 | -1.27451400 |
| C  | 1.84435500  | 0.51148900  | -1.24126300 |
| C  | 1.67888800  | 1.89335100  | -1.45009700 |
| H  | 1.23638700  | 4.70496100  | -1.11551500 |
| H  | -1.12956700 | 5.22855100  | 0.07575100  |
| H  | -5.59673600 | 2.39523300  | 0.44855300  |
| H  | -6.28000200 | -0.06368100 | -0.38392700 |
| H  | -3.44732800 | -4.57470800 | -0.78478400 |
| H  | -0.85694500 | -5.12821900 | -0.31159100 |
| H  | 3.60910100  | -2.22634300 | -0.67963300 |
| H  | 4.05339000  | 0.28991000  | -1.51006300 |
| Mn | -1.07380500 | 0.05748900  | -0.58241200 |
| Cl | -1.34174700 | 0.14671000  | -2.88895500 |
| O  | -0.92231400 | -0.02013100 | 1.20107700  |
| C  | -5.19912400 | -2.52765200 | -1.03999700 |

|   |             |             |             |
|---|-------------|-------------|-------------|
| C | -6.13699400 | -2.74697900 | -0.02594800 |
| C | -5.45310300 | -3.11241200 | -2.28590400 |
| C | -7.29079900 | -3.49714700 | -0.24005300 |
| C | -6.59668300 | -3.87316200 | -2.52073900 |
| C | -7.51876200 | -4.06317300 | -1.49312600 |
| C | -3.47644100 | 4.02421300  | 0.86271600  |
| C | -3.75620600 | 4.06457700  | 2.23181500  |
| C | -3.89367400 | 5.10904600  | 0.08737800  |
| C | -4.42194600 | 5.14032100  | 2.81458400  |
| C | -4.55863900 | 6.19785100  | 0.64770500  |
| C | -4.82504100 | 6.20947900  | 2.01596100  |
| C | 1.57987100  | -3.96075800 | 0.03382400  |
| C | 1.54433600  | -4.44481900 | 1.34407400  |
| C | 2.44196200  | -4.59875500 | -0.86288500 |
| C | 2.35215000  | -5.49728800 | 1.75996500  |
| C | 3.26679700  | -5.64744900 | -0.46512400 |
| C | 3.22454700  | -6.09014900 | 0.85413000  |
| F | -5.93830800 | -2.22841400 | 1.19388700  |
| F | -8.17198700 | -3.68690400 | 0.74833800  |
| F | -8.61914200 | -4.78779500 | -1.70793900 |
| F | -6.81621100 | -4.41811500 | -3.72157700 |
| F | -4.58351100 | -2.95083200 | -3.28809700 |
| F | -3.64943800 | 5.12126600  | -1.22888900 |
| F | -4.94655100 | 7.22507800  | -0.11548800 |
| F | -5.46304800 | 7.24692000  | 2.56237600  |
| F | -4.67369300 | 5.15632300  | 4.12752500  |
| F | -3.37305700 | 3.05120800  | 3.02176500  |
| F | 2.51810400  | -4.18016500 | -2.13254400 |
| F | 0.76491400  | -3.84906200 | 2.25768600  |
| F | 2.36709800  | -5.87518200 | 3.04532000  |
| F | 4.07067300  | -7.04068100 | 1.26637900  |
| F | 4.12863700  | -6.20132300 | -1.32494800 |
| C | 2.76121500  | 2.61973700  | -2.01506800 |
| C | 3.70637400  | 3.18792200  | -2.52154700 |
| C | 4.87085000  | 3.79701200  | -3.14695100 |
| H | 4.73325500  | 3.75834700  | -4.23648100 |
| C | 5.28107100  | 5.24235200  | -2.72034900 |
| H | 4.50420800  | 6.00345300  | -2.83257600 |
| C | 6.25316300  | 3.18361500  | -2.76026500 |
| H | 6.34494900  | 2.10303900  | -2.88590900 |
| C | 7.19404300  | 4.03487100  | -3.64364800 |
| H | 8.21540900  | 4.05207900  | -3.24991500 |
| H | 7.24211800  | 3.62815200  | -4.65910900 |
| C | 6.51622100  | 5.44871000  | -3.62981400 |

|   |             |             |             |
|---|-------------|-------------|-------------|
| H | 7.17789700  | 6.23140500  | -3.24475700 |
| H | 6.20757200  | 5.74866200  | -4.63668000 |
| C | 5.79472700  | 5.07150400  | -1.26934100 |
| H | 6.52435700  | 5.85186000  | -1.03688500 |
| C | 6.43356500  | 3.64816600  | -1.29725300 |
| H | 7.48930100  | 3.62048300  | -1.00766500 |
| C | 4.71066200  | 5.01483300  | -0.15718900 |
| H | 3.70538200  | 5.18064300  | -0.56401300 |
| H | 4.88499200  | 5.76540500  | 0.62212700  |
| C | 5.63519100  | 2.84358800  | -0.27693100 |
| O | 5.74651700  | 1.62100200  | -0.09583700 |
| N | 4.81202400  | 3.67159400  | 0.39275800  |
| H | 4.06808200  | 3.27492400  | 0.98310400  |
| C | 5.63567900  | -2.80747600 | 1.90995800  |
| C | 5.36927200  | -1.47442200 | 1.59717200  |
| C | 4.22025700  | -0.84361100 | 2.09225100  |
| C | 3.29359900  | -1.54443900 | 2.90864300  |
| C | 3.59169400  | -2.89145200 | 3.23183600  |
| C | 4.73134200  | -3.50421900 | 2.74518300  |
| H | 6.04399100  | -0.90789200 | 0.95997300  |
| C | 2.12288400  | -0.86915500 | 3.32969700  |
| H | 2.89238000  | -3.44912000 | 3.84748000  |
| H | 4.92664000  | -4.54436400 | 2.99446900  |
| C | 1.84927100  | 0.47581200  | 2.99126000  |
| C | 2.84823000  | 1.19136000  | 2.15316100  |
| H | 1.39425500  | -1.41394200 | 3.92509400  |
| C | 6.85081300  | -3.51072500 | 1.34578600  |
| H | 7.52084700  | -2.77217400 | 0.89014100  |
| H | 7.41379600  | -3.98047000 | 2.16394900  |
| O | 2.71620000  | 2.37500300  | 1.79389800  |
| C | 0.67003900  | 1.10190100  | 3.40717500  |
| H | -0.01645600 | 0.20635300  | 1.47895400  |
| C | 6.49399100  | -4.58796700 | 0.30515700  |
| H | 7.40042600  | -5.03775200 | -0.11531600 |
| H | 5.90154500  | -5.39305000 | 0.75002700  |
| H | 5.91396500  | -4.16194000 | -0.52144200 |
| N | 3.95446400  | 0.47605900  | 1.77686100  |
| H | 4.60677800  | 0.94844000  | 1.12904300  |
| C | 0.19244000  | 2.48843300  | 3.10409200  |
| H | 0.71801200  | 3.23162900  | 3.72229100  |
| H | 0.38668700  | 2.77191600  | 2.06805500  |
| H | -0.87946800 | 2.56994400  | 3.30432800  |
| H | 0.01326300  | 0.48935300  | 4.02207500  |



**<sup>3</sup>TS2-R\_sub**

|   |             |             |             |
|---|-------------|-------------|-------------|
| C | 2.77615500  | 0.02792500  | -0.35597200 |
| C | 1.72727900  | -0.88691100 | -0.32411500 |
| C | 0.40341300  | -0.44807200 | -0.16431700 |
| C | 0.11322200  | 0.92950600  | -0.03623800 |
| C | 1.18461600  | 1.84269000  | -0.07070400 |
| C | 2.48885500  | 1.40363200  | -0.22662400 |
| H | 1.92964100  | -1.95155000 | -0.42329700 |
| C | -1.26313600 | 1.31472400  | 0.11226300  |
| H | 0.97018900  | 2.90460000  | 0.02268800  |
| H | 3.30460400  | 2.12152700  | -0.25378800 |
| C | -2.30254100 | 0.43288900  | 0.11876800  |
| C | -2.00646800 | -1.01166900 | 0.06764500  |
| H | -1.47485600 | 2.37959300  | 0.20379100  |
| C | 4.20919400  | -0.44273400 | -0.47233500 |
| H | 4.24058900  | -1.42015600 | -0.96929300 |
| H | 4.77249700  | 0.25156500  | -1.10900000 |
| O | -2.82049700 | -1.92623800 | 0.18325200  |
| C | -3.71941700 | 0.92070000  | 0.36307400  |
| H | -3.87111000 | 0.96476400  | 1.45285900  |
| H | -3.78122100 | 1.95873500  | 0.01233900  |
| C | -4.87129600 | 0.10001900  | -0.23723200 |
| H | -4.75052500 | -0.01970700 | -1.32030100 |
| H | -4.91833900 | -0.89515700 | 0.20186300  |
| H | -5.81960400 | 0.62088100  | -0.06028300 |
| C | 4.89858200  | -0.54462200 | 0.90091100  |
| H | 4.37293400  | -1.25634100 | 1.54733800  |
| H | 5.93711000  | -0.87823100 | 0.79486000  |
| H | 4.90097200  | 0.42643800  | 1.40873100  |
| N | -0.65719400 | -1.32852600 | -0.12336500 |
| H | -0.47929900 | -2.32583700 | -0.16171800 |

**<sup>3</sup>TS2-S\_sub**

|   |             |             |             |
|---|-------------|-------------|-------------|
| C | -2.71911200 | -0.15098900 | -0.34892500 |
| C | -1.76709200 | 0.86494500  | -0.33476200 |
| C | -0.40632400 | 0.56661800  | -0.16365200 |
| C | 0.02123600  | -0.77221600 | -0.00280700 |
| C | -0.95356300 | -1.78792200 | -0.01978400 |
| C | -2.29511200 | -1.48693500 | -0.18892900 |
| H | -2.07530500 | 1.90135500  | -0.45834000 |
| C | 1.42866100  | -1.02071900 | 0.16716900  |
| H | -0.63398700 | -2.82052200 | 0.09869400  |
| H | -3.03371000 | -2.28436800 | -0.20211600 |
| C | 2.36064700  | -0.03018500 | 0.17416400  |

|   |             |             |             |
|---|-------------|-------------|-------------|
| C | 1.92976800  | 1.37282000  | 0.02202300  |
| H | 1.73895700  | -2.05630300 | 0.28881700  |
| C | -4.19154200 | 0.17135300  | -0.47836300 |
| H | -4.31870300 | 1.12603600  | -1.00352700 |
| H | -4.68164000 | -0.59356700 | -1.09427800 |
| O | 2.68270600  | 2.34472800  | 0.03439600  |
| C | 3.84117600  | -0.24983900 | 0.38336900  |
| H | 4.36434000  | 0.61052300  | -0.04585500 |
| H | 4.05721700  | -0.21093800 | 1.46141600  |
| C | 4.39366000  | -1.55082300 | -0.21083500 |
| H | 3.96699200  | -2.44024100 | 0.26769500  |
| H | 4.17980800  | -1.61307400 | -1.28379400 |
| H | 5.47963000  | -1.59945900 | -0.07607900 |
| C | -4.89084800 | 0.24424700  | 0.89168500  |
| H | -4.43961300 | 1.02289100  | 1.51685700  |
| H | -5.95706500 | 0.47024000  | 0.77670000  |
| H | -4.79816700 | -0.70719300 | 1.42742700  |
| N | 0.55717900  | 1.55568200  | -0.14812500 |
| H | 0.28002200  | 2.52489100  | -0.25402100 |

**<sup>3</sup>TS2-R**

|   |             |             |             |
|---|-------------|-------------|-------------|
| N | -0.60919800 | 1.97718500  | -0.48778800 |
| N | -2.99865700 | 0.47171300  | -0.33079400 |
| N | -1.49006600 | -1.90044600 | -0.63965600 |
| N | 0.87332600  | -0.36531500 | -0.82834300 |
| C | 0.53402500  | 2.56740900  | -0.95976400 |
| C | 0.44635500  | 3.98969100  | -0.77815600 |
| C | -0.74112800 | 4.24307000  | -0.15643100 |
| C | -1.42718200 | 2.98163100  | -0.02534600 |
| C | -2.76767100 | 2.82612100  | 0.34008800  |
| C | -3.50768200 | 1.65988800  | 0.11174100  |
| C | -4.94861400 | 1.56822100  | 0.16372700  |
| C | -5.28456000 | 0.32885000  | -0.28756200 |
| C | -4.05037800 | -0.37722900 | -0.55220200 |
| C | -3.94109400 | -1.74525100 | -0.83290100 |
| C | -2.73173100 | -2.45262500 | -0.79396900 |
| C | -2.61302300 | -3.89155500 | -0.73409400 |
| C | -1.30478600 | -4.17629400 | -0.48004400 |
| C | -0.59769100 | -2.91896900 | -0.44162300 |
| C | 0.79179100  | -2.77620100 | -0.34815300 |
| C | 1.47335800  | -1.58168800 | -0.60940100 |
| C | 2.89265900  | -1.45238800 | -0.84404000 |
| C | 3.11584600  | -0.17955300 | -1.27700500 |
| C | 1.84766800  | 0.50204500  | -1.23690800 |

|    |             |             |             |
|----|-------------|-------------|-------------|
| C  | 1.67475700  | 1.88631100  | -1.41809500 |
| H  | 1.22044900  | 4.68825300  | -1.06190700 |
| H  | -1.13704000 | 5.19996300  | 0.15130700  |
| H  | -5.61034700 | 2.36748900  | 0.46608100  |
| H  | -6.27578600 | -0.08335500 | -0.40540600 |
| H  | -3.43478600 | -4.58587500 | -0.83534400 |
| H  | -0.84565000 | -5.14825300 | -0.36644800 |
| H  | 3.62615100  | -2.22973300 | -0.69487700 |
| H  | 4.05964500  | 0.29316300  | -1.50928600 |
| Mn | -1.05378700 | 0.04697000  | -0.53475800 |
| Cl | -1.35190000 | 0.16429600  | -2.85774700 |
| O  | -0.96405900 | -0.23571400 | 1.15749400  |
| C  | -5.18356600 | -2.53253000 | -1.06852400 |
| C  | -6.12054000 | -2.76690000 | -0.05717600 |
| C  | -5.43692400 | -3.10091100 | -2.32201300 |
| C  | -7.27326000 | -3.51596500 | -0.28067200 |
| C  | -6.57958500 | -3.86016100 | -2.56647000 |
| C  | -7.50089700 | -4.06538600 | -1.54114800 |
| C  | -3.48389200 | 3.99831600  | 0.91808000  |
| C  | -3.75639400 | 4.05112200  | 2.28766600  |
| C  | -3.91626900 | 5.07003300  | 0.13301100  |
| C  | -4.42929900 | 5.12638300  | 2.86295000  |
| C  | -4.58940200 | 6.15810100  | 0.68518900  |
| C  | -4.84817000 | 6.18217700  | 2.05475700  |
| C  | 1.59716100  | -3.96932700 | 0.02874800  |
| C  | 1.54706700  | -4.44642000 | 1.34137700  |
| C  | 2.48746200  | -4.59793800 | -0.84705000 |
| C  | 2.36955200  | -5.47750000 | 1.78096900  |
| C  | 3.32921900  | -5.62400100 | -0.42479400 |
| C  | 3.27143100  | -6.05845400 | 0.89657300  |
| F  | -5.92205500 | -2.26423900 | 1.16943800  |
| F  | -8.15382500 | -3.72039300 | 0.70555100  |
| F  | -8.60035900 | -4.78886900 | -1.76521300 |
| F  | -6.79884300 | -4.38954200 | -3.77440100 |
| F  | -4.56794700 | -2.92506200 | -3.32205000 |
| F  | -3.67821100 | 5.07041300  | -1.18416800 |
| F  | -4.99168100 | 7.17314900  | -0.08681200 |
| F  | -5.49361100 | 7.21917700  | 2.59338500  |
| F  | -4.67364000 | 5.15419600  | 4.17714500  |
| F  | -3.35702400 | 3.05034400  | 3.08651700  |
| F  | 2.57819000  | -4.18937500 | -2.11873200 |
| F  | 0.74283000  | -3.85751500 | 2.23894000  |
| F  | 2.37073300  | -5.84206000 | 3.07069100  |
| F  | 4.12892500  | -6.98844000 | 1.33239300  |

|   |            |             |             |
|---|------------|-------------|-------------|
| F | 4.21896600 | -6.16561800 | -1.26379300 |
| C | 2.74473600 | 2.62233500  | -1.99433100 |
| C | 3.68343600 | 3.18735200  | -2.51643100 |
| C | 4.83765000 | 3.79335100  | -3.16447800 |
| H | 4.68523200 | 3.74000500  | -4.25144000 |
| C | 5.24781500 | 5.24555000  | -2.76262300 |
| H | 4.46595300 | 6.00180700  | -2.87281700 |
| C | 6.22904100 | 3.19132300  | -2.79121600 |
| H | 6.32415900 | 2.10965600  | -2.90424700 |
| C | 7.15195400 | 4.03526400  | -3.70001000 |
| H | 8.17956600 | 4.06113300  | -3.32332200 |
| H | 7.18503500 | 3.61632800  | -4.71110400 |
| C | 6.46870000 | 5.44643900  | -3.69219600 |
| H | 7.13273200 | 6.23598800  | -3.32554800 |
| H | 6.14433000 | 5.73389700  | -4.69775700 |
| C | 5.78220600 | 5.09489800  | -1.31694100 |
| H | 6.50859300 | 5.88331100  | -1.10208100 |
| C | 6.43089700 | 3.67573200  | -1.33687600 |
| H | 7.49132700 | 3.65810300  | -1.06433500 |
| C | 4.71074800 | 5.04184700  | -0.19273600 |
| H | 3.70033800 | 5.19817500  | -0.58994500 |
| H | 4.88935900 | 5.80035900  | 0.57790400  |
| C | 5.65064500 | 2.87709900  | -0.29867100 |
| O | 5.77414200 | 1.65719700  | -0.10537400 |
| N | 4.82429800 | 3.70400400  | 0.36919800  |
| H | 4.06313800 | 3.29667100  | 0.93021300  |
| C | 5.65732100 | -2.75181400 | 2.02760100  |
| C | 5.41199000 | -1.42839100 | 1.67802600  |
| C | 4.22664400 | -0.79343100 | 2.09113300  |
| C | 3.25890900 | -1.49388300 | 2.85047800  |
| C | 3.53913400 | -2.82687900 | 3.22422100  |
| C | 4.70961800 | -3.44131500 | 2.82285700  |
| H | 6.12010500 | -0.87116200 | 1.06986200  |
| C | 2.03236800 | -0.82563400 | 3.14314500  |
| H | 2.80278900 | -3.37684800 | 3.80231300  |
| H | 4.89514500 | -4.47595400 | 3.09962000  |
| C | 1.76993800 | 0.46399800  | 2.75002900  |
| C | 2.79870600 | 1.19350900  | 1.99688600  |
| H | 1.26206500 | -1.38389800 | 3.67076100  |
| C | 6.89506400 | -3.46913500 | 1.53500300  |
| H | 7.59681800 | -2.74064800 | 1.11260400  |
| H | 7.40590300 | -3.94168200 | 2.38481100  |
| O | 2.66280400 | 2.36190400  | 1.58684600  |
| C | 0.41446500 | 1.04170300  | 2.94887500  |

|   |             |             |             |
|---|-------------|-------------|-------------|
| H | -0.18570000 | 0.69979400  | 2.00243400  |
| C | 6.57720300  | -4.54627500 | 0.48093500  |
| H | 7.49848100  | -5.00757800 | 0.10837200  |
| H | 5.95332500  | -5.34256100 | 0.89762700  |
| H | 6.04474700  | -4.11559100 | -0.37471400 |
| N | 3.96790100  | 0.50964800  | 1.74070900  |
| H | 4.64255900  | 0.98086300  | 1.11325400  |
| C | 0.19765300  | 2.54116800  | 3.12550800  |
| H | 0.54073000  | 3.10402600  | 2.25869700  |
| H | -0.86806800 | 2.73345500  | 3.28450600  |
| H | 0.74894900  | 2.90678500  | 4.00207700  |
| H | -0.11034600 | 0.47492400  | 3.72657800  |

**<sup>5</sup>TS2-R**

|   |             |             |             |
|---|-------------|-------------|-------------|
| N | -0.61049100 | 1.97845800  | -0.46587000 |
| N | -3.01810400 | 0.47603400  | -0.35916500 |
| N | -1.51494400 | -1.87995100 | -0.60971300 |
| N | 0.85689000  | -0.37073600 | -0.83512300 |
| C | 0.53391500  | 2.56902300  | -0.92631800 |
| C | 0.45231500  | 3.99063100  | -0.73463900 |
| C | -0.74108600 | 4.24221700  | -0.12083800 |
| C | -1.42557200 | 2.97865300  | -0.00326300 |
| C | -2.77525700 | 2.82413000  | 0.34226300  |
| C | -3.52020300 | 1.67012900  | 0.09085500  |
| C | -4.96207900 | 1.58651300  | 0.14220500  |
| C | -5.30653900 | 0.35072800  | -0.31041300 |
| C | -4.07536500 | -0.36280200 | -0.57357000 |
| C | -3.96746800 | -1.73593200 | -0.83308300 |
| C | -2.75957800 | -2.43975200 | -0.76114200 |
| C | -2.63873300 | -3.87425000 | -0.67678600 |
| C | -1.33038000 | -4.15638800 | -0.41460100 |
| C | -0.61854400 | -2.90540900 | -0.39927900 |
| C | 0.76919500  | -2.77110300 | -0.32332300 |
| C | 1.45677500  | -1.58143400 | -0.60569300 |
| C | 2.87712300  | -1.45815300 | -0.83453900 |
| C | 3.10467400  | -0.18486700 | -1.26500400 |
| C | 1.83573100  | 0.49760700  | -1.23126100 |
| C | 1.67088500  | 1.88483500  | -1.39548200 |
| H | 1.22929400  | 4.68961100  | -1.00952500 |
| H | -1.14016200 | 5.19746900  | 0.18825100  |
| H | -5.61835700 | 2.38846100  | 0.44928000  |
| H | -6.30007700 | -0.05635100 | -0.42634900 |
| H | -3.45947800 | -4.57075000 | -0.77126800 |
| H | -0.87516700 | -5.12789000 | -0.28340600 |

|    |             |             |             |
|----|-------------|-------------|-------------|
| H  | 3.60887500  | -2.23554000 | -0.67719200 |
| H  | 4.05099200  | 0.28746400  | -1.48833500 |
| Mn | -1.08502600 | 0.03457300  | -0.57417700 |
| Cl | -1.32502800 | 0.24872600  | -2.88590100 |
| O  | -0.99009200 | -0.20562100 | 1.17351100  |
| C  | -5.20719800 | -2.52673300 | -1.06885700 |
| C  | -6.15697100 | -2.74200400 | -0.06516500 |
| C  | -5.44575000 | -3.11743600 | -2.31497500 |
| C  | -7.30813700 | -3.49318300 | -0.28983000 |
| C  | -6.58642400 | -3.87925400 | -2.56029600 |
| C  | -7.52091900 | -4.06464800 | -1.54308800 |
| C  | -3.48701800 | 3.99662700  | 0.92702100  |
| C  | -3.71203100 | 4.06952800  | 2.30397600  |
| C  | -3.95346800 | 5.05137300  | 0.13902800  |
| C  | -4.37404700 | 5.14941900  | 2.88364500  |
| C  | -4.61756800 | 6.14283900  | 0.69543400  |
| C  | -4.82926900 | 6.18782800  | 2.07260000  |
| C  | 1.57264100  | -3.96548900 | 0.05291100  |
| C  | 1.53321200  | -4.43952400 | 1.36705000  |
| C  | 2.45325000  | -4.59864500 | -0.82973600 |
| C  | 2.35574600  | -5.47337600 | 1.80038900  |
| C  | 3.29520400  | -5.62683200 | -0.41357000 |
| C  | 3.24790100  | -6.05867900 | 0.90911200  |
| F  | -5.97265900 | -2.21832000 | 1.15474300  |
| F  | -8.20113400 | -3.67879400 | 0.68872300  |
| F  | -8.61852600 | -4.79045700 | -1.76797000 |
| F  | -6.79117100 | -4.43003500 | -3.76109400 |
| F  | -4.56347800 | -2.96117400 | -3.30686100 |
| F  | -3.75789900 | 5.03087900  | -1.18486200 |
| F  | -5.05414300 | 7.14182600  | -0.07890100 |
| F  | -5.46516400 | 7.22844800  | 2.61564900  |
| F  | -4.57444700 | 5.19755200  | 4.20461600  |
| F  | -3.27812600 | 3.08525900  | 3.10447200  |
| F  | 2.53267800  | -4.19333700 | -2.10317500 |
| F  | 0.73969800  | -3.84648400 | 2.27099500  |
| F  | 2.36739800  | -5.83592500 | 3.09052300  |
| F  | 4.10594500  | -6.99087500 | 1.33882700  |
| F  | 4.17456600  | -6.17365000 | -1.26001600 |
| C  | 2.74023200  | 2.61950200  | -1.97311100 |
| C  | 3.67506800  | 3.18168000  | -2.50566800 |
| C  | 4.82033700  | 3.78131400  | -3.17508300 |
| H  | 4.64419600  | 3.72954600  | -4.25858100 |
| C  | 5.24865200  | 5.23044900  | -2.78160100 |
| H  | 4.46972300  | 5.99198400  | -2.87475800 |

|   |             |             |             |
|---|-------------|-------------|-------------|
| C | 6.21528000  | 3.16951700  | -2.83224600 |
| H | 6.30042800  | 2.08730500  | -2.94779600 |
| C | 7.12400300  | 4.00779900  | -3.76028500 |
| H | 8.15961700  | 4.02635300  | -3.40576200 |
| H | 7.13244800  | 3.58936100  | -4.77209000 |
| C | 6.45074300  | 5.42358100  | -3.73695000 |
| H | 7.12778700  | 6.20826100  | -3.38394800 |
| H | 6.10701000  | 5.71410900  | -4.73517200 |
| C | 5.81255200  | 5.07509600  | -1.34774700 |
| H | 6.54833400  | 5.85863000  | -1.14754900 |
| C | 6.45128000  | 3.65161800  | -1.38231500 |
| H | 7.51701200  | 3.62645700  | -1.13204600 |
| C | 4.76407000  | 5.02795300  | -0.20188800 |
| H | 3.74682000  | 5.19270100  | -0.57788100 |
| H | 4.96410300  | 5.78360000  | 0.56628600  |
| C | 5.68663700  | 2.85689800  | -0.32957200 |
| O | 5.80530300  | 1.63575600  | -0.14076800 |
| N | 4.87885000  | 3.68818300  | 0.35508200  |
| H | 4.12487900  | 3.28467200  | 0.92882600  |
| C | 5.68216500  | -2.77933200 | 1.99261500  |
| C | 5.44418400  | -1.45311900 | 1.64786300  |
| C | 4.26826600  | -0.80938900 | 2.07364000  |
| C | 3.30162400  | -1.50360000 | 2.84063500  |
| C | 3.57536600  | -2.83927800 | 3.21004000  |
| C | 4.73695300  | -3.46236000 | 2.79655400  |
| H | 6.15104600  | -0.90061400 | 1.03392200  |
| C | 2.08322200  | -0.82685600 | 3.14588300  |
| H | 2.84085900  | -3.38355900 | 3.79583200  |
| H | 4.91730800  | -4.49870400 | 3.07043900  |
| C | 1.82597300  | 0.46661200  | 2.75968100  |
| C | 2.85569100  | 1.18956500  | 2.00040600  |
| H | 1.31343700  | -1.38041600 | 3.67913200  |
| C | 6.90850600  | -3.50630700 | 1.48613600  |
| H | 7.61160800  | -2.78345700 | 1.05635800  |
| H | 7.42473800  | -3.98370800 | 2.32997300  |
| O | 2.72769100  | 2.36111000  | 1.59691700  |
| C | 0.47591700  | 1.05451300  | 2.97304400  |
| H | -0.13352600 | 0.72586000  | 2.04311700  |
| C | 6.56976800  | -4.58012700 | 0.43514100  |
| H | 7.48277300  | -5.04973500 | 0.05268700  |
| H | 5.94301400  | -5.37073800 | 0.85828000  |
| H | 6.03216100  | -4.14427900 | -0.41463400 |
| N | 4.01682700  | 0.49700400  | 1.73048400  |
| H | 4.68839300  | 0.96471200  | 1.09755300  |

|   |             |            |            |
|---|-------------|------------|------------|
| C | 0.27877200  | 2.55764500 | 3.15945400 |
| H | 0.84115100  | 2.91783200 | 4.03111100 |
| H | 0.61580400  | 3.11944500 | 2.28964300 |
| H | -0.78380900 | 2.75959700 | 3.32876200 |
| H | -0.03569900 | 0.49519400 | 3.76522400 |

**<sup>3</sup>TS4-R**

|    |             |             |             |
|----|-------------|-------------|-------------|
| N  | -0.02939000 | 1.99987300  | 0.49815200  |
| N  | 2.53165500  | 0.72575100  | 0.46838000  |
| N  | 1.24029900  | -1.82491200 | 0.52901500  |
| N  | -1.30066300 | -0.52094800 | 0.54500700  |
| C  | -1.28235700 | 2.44428800  | 0.85232400  |
| C  | -1.27578800 | 3.88399800  | 0.91231000  |
| C  | -0.03115600 | 4.29496000  | 0.54685200  |
| C  | 0.75845000  | 3.11072900  | 0.32040900  |
| C  | 2.13761800  | 3.12487600  | 0.08817000  |
| C  | 2.95857800  | 1.99957900  | 0.18724800  |
| C  | 4.40176500  | 2.01842300  | 0.13122600  |
| C  | 4.83248700  | 0.76215800  | 0.42367300  |
| C  | 3.65080700  | -0.04761700 | 0.60505600  |
| C  | 3.67306400  | -1.44261800 | 0.77195500  |
| C  | 2.52722400  | -2.25564200 | 0.68639800  |
| C  | 2.56500000  | -3.69628500 | 0.64742100  |
| C  | 1.29001600  | -4.12009400 | 0.43965200  |
| C  | 0.45702600  | -2.94223500 | 0.38671200  |
| C  | -0.93687400 | -2.95604200 | 0.29954700  |
| C  | -1.73990000 | -1.81784700 | 0.40407400  |
| C  | -3.17478300 | -1.84783700 | 0.53317500  |
| C  | -3.58219300 | -0.57864000 | 0.80134600  |
| C  | -2.40295700 | 0.25066500  | 0.81587300  |
| H  | -2.11912800 | 4.50079400  | 1.18388700  |
| H  | 0.33872700  | 5.30770500  | 0.47960700  |
| H  | 5.00868800  | 2.88604900  | -0.08207000 |
| H  | 5.85395200  | 0.41353500  | 0.48268800  |
| H  | 3.46487500  | -4.28525100 | 0.74705300  |
| H  | 0.93602900  | -5.13578700 | 0.33929500  |
| H  | -3.78942900 | -2.73174700 | 0.44804300  |
| H  | -4.59437000 | -0.22636400 | 0.93246500  |
| Mn | 0.60591300  | 0.09958000  | 0.46441900  |
| Cl | 0.67069900  | 0.10759500  | 2.80482800  |
| O  | 0.73562600  | 0.01641200  | -1.24168100 |
| C  | 2.77735800  | 4.44694100  | -0.16654900 |
| C  | 2.56663400  | 5.13420000  | -1.36544300 |
| C  | 3.59195800  | 5.06328900  | 0.78969400  |



|   |             |             |             |
|---|-------------|-------------|-------------|
| C | 3.14187900  | 6.37809500  | -1.61379900 |
| C | 4.18301800  | 6.30415000  | 0.56216400  |
| C | 3.95425900  | 6.96337400  | -0.64454300 |
| C | -1.62278500 | -4.28180900 | 0.26447800  |
| C | -2.30621200 | -4.74308300 | -0.86287400 |
| C | -1.63548300 | -5.10656700 | 1.39594400  |
| C | -2.98176700 | -5.96114000 | -0.87308200 |
| C | -2.29253700 | -6.33517900 | 1.40658900  |
| C | -2.97154900 | -6.76194200 | 0.26661100  |
| F | 3.82073700  | 4.45875100  | 1.96062900  |
| F | 4.95687100  | 6.86983500  | 1.49355400  |
| F | 4.51212700  | 8.15436300  | -0.87145600 |
| F | 2.92320300  | 7.00948300  | -2.77224400 |
| F | 1.79109000  | 4.59921700  | -2.32019900 |
| F | -1.00408100 | -4.72040200 | 2.50933700  |
| F | -2.33252200 | -4.00531000 | -1.98324000 |
| F | -3.63400200 | -6.36466300 | -1.97012500 |
| F | -3.61072800 | -7.93373500 | 0.26720700  |
| F | -2.28515100 | -7.10053200 | 2.50238400  |
| C | 5.99335900  | -2.67809000 | 0.96711500  |
| C | 7.23870300  | -3.42980100 | 0.99814200  |
| H | 7.26591200  | -4.00872900 | 1.93163200  |
| C | 7.51599200  | -4.37497000 | -0.21752000 |
| H | 6.72950500  | -5.10381000 | -0.43211700 |
| C | 8.57618000  | -2.64701700 | 0.82098400  |
| H | 8.73321600  | -1.80895500 | 1.50247400  |
| C | 9.58911300  | -3.80787900 | 0.94894900  |
| H | 10.55118800 | -3.55930400 | 0.48984800  |
| H | 9.77982500  | -4.04099600 | 2.00184600  |
| C | 8.86265200  | -4.99592900 | 0.22754900  |
| H | 9.43136800  | -5.38446800 | -0.62367700 |
| H | 8.69262000  | -5.83160100 | 0.91443600  |
| C | 7.81323200  | -3.39983700 | -1.38380500 |
| H | 8.44788500  | -3.89122500 | -2.12627200 |
| C | 8.54164400  | -2.22435200 | -0.66536400 |
| H | 9.55338500  | -2.02918400 | -1.03529600 |
| C | 6.58292100  | -2.75848700 | -2.09353500 |
| H | 5.63831300  | -3.13742800 | -1.68641400 |
| H | 6.59200700  | -2.95689900 | -3.17140600 |
| C | 7.69081900  | -0.98701500 | -0.93573600 |
| O | 7.85563400  | 0.11808400  | -0.43449000 |
| N | 6.72235600  | -1.33117900 | -1.83238800 |
| H | 5.97491900  | -0.67513200 | -2.02132100 |
| C | -7.12443600 | -0.77135800 | -1.53008900 |

|   |              |             |             |
|---|--------------|-------------|-------------|
| C | -6.01545000  | -1.47888000 | -1.98657700 |
| C | -4.81922400  | -0.81327500 | -2.29647100 |
| C | -4.72265700  | 0.59306800  | -2.14597800 |
| C | -5.86153100  | 1.29866100  | -1.70226700 |
| C | -7.03444700  | 0.63228000  | -1.39405300 |
| H | -6.06871800  | -2.55995700 | -2.09975600 |
| C | -3.45585800  | 1.21568600  | -2.38811800 |
| H | -5.79888100  | 2.37689800  | -1.59040300 |
| H | -7.89904500  | 1.18906900  | -1.04196600 |
| C | -2.34597700  | 0.50860200  | -2.75700300 |
| C | -2.44305100  | -0.94971000 | -2.96867900 |
| H | -3.38558300  | 2.28613700  | -2.24478200 |
| C | -8.42679800  | -1.48105900 | -1.23571600 |
| H | -8.23069000  | -2.53136500 | -0.98757100 |
| H | -8.89759400  | -1.03100100 | -0.35229400 |
| O | -1.51183900  | -1.66096200 | -3.32826600 |
| C | -0.99806700  | 1.08938400  | -2.91284600 |
| H | -0.34284300  | 0.61922100  | -2.05769400 |
| C | -9.40468600  | -1.40961300 | -2.42355100 |
| H | -10.34439400 | -1.92113500 | -2.18722400 |
| H | -9.63536900  | -0.36878200 | -2.67659800 |
| H | -8.97053000  | -1.88025300 | -3.31261800 |
| N | -3.70480000  | -1.49828700 | -2.72687800 |
| H | -3.73664500  | -2.50797300 | -2.80345600 |
| C | -0.85115800  | 2.59959700  | -2.83859600 |
| H | -1.35987600  | 3.08572000  | -3.68177200 |
| H | -1.26924000  | 3.00617200  | -1.91247100 |
| H | 0.20399900   | 2.87806400  | -2.87118400 |
| H | -0.48418200  | 0.64644200  | -3.77334100 |
| C | -2.40589300  | 1.63433800  | 1.03288500  |
| C | -3.69497200  | 2.24839700  | 1.45559300  |
| C | -4.30210400  | 1.86279500  | 2.65989600  |
| C | -4.39603700  | 3.16941700  | 0.67339100  |
| C | -5.55237000  | 2.34122000  | 3.04610600  |
| C | -5.65109900  | 3.65119600  | 1.02983300  |
| C | -6.23482800  | 3.23534800  | 2.22299900  |
| C | 4.93245900   | -2.09128500 | 0.91352800  |
| F | -3.88656500  | 3.60454100  | -0.49470600 |
| F | -6.30852200  | 4.47890200  | 0.20719100  |
| F | -7.44084400  | 3.68618200  | 2.57389300  |
| F | -6.10381200  | 1.94463700  | 4.19676300  |
| F | -3.69052500  | 0.99129600  | 3.46660300  |

<sup>3</sup>TS4-S

|    |             |             |             |
|----|-------------|-------------|-------------|
| N  | 0.32211200  | 2.17449300  | 0.46445200  |
| N  | -2.42559600 | 1.37308400  | 0.42741100  |
| N  | -1.60564400 | -1.36548300 | 0.54224600  |
| N  | 1.12583400  | -0.53155900 | 0.55827400  |
| C  | 1.63214300  | 2.39421200  | 0.82201600  |
| C  | 1.87983000  | 3.81235600  | 0.87196200  |
| C  | 0.72787900  | 4.43397800  | 0.49978500  |
| C  | -0.25715600 | 3.40627800  | 0.27682700  |
| C  | -1.61084100 | 3.66196300  | 0.03524900  |
| C  | -2.61809200 | 2.69874100  | 0.12964300  |
| C  | -4.03418700 | 2.96818100  | 0.04245400  |
| C  | -4.67761700 | 1.80456100  | 0.32664600  |
| C  | -3.66162800 | 0.80483400  | 0.54389100  |
| C  | -3.93368200 | -0.56175700 | 0.74116200  |
| C  | -2.94980400 | -1.56429100 | 0.70259200  |
| C  | -3.24081100 | -2.97815400 | 0.70182000  |
| C  | -2.05784500 | -3.61825800 | 0.50271200  |
| C  | -1.03103500 | -2.60604800 | 0.42584500  |
| C  | 0.33818000  | -2.86650700 | 0.34115600  |
| C  | 1.32920800  | -1.88681000 | 0.43419700  |
| C  | 2.73647800  | -2.16851700 | 0.56711800  |
| C  | 3.36168300  | -0.98831400 | 0.82031400  |
| C  | 2.34747900  | 0.03700100  | 0.82073800  |
| H  | 2.81794500  | 4.27253600  | 1.14329100  |
| H  | 0.54335500  | 5.49579700  | 0.42572200  |
| H  | -4.47218900 | 3.92804900  | -0.18898900 |
| H  | -5.73981500 | 1.61286600  | 0.36784700  |
| H  | -4.21895800 | -3.42336400 | 0.81560500  |
| H  | -1.89238300 | -4.68306800 | 0.42790500  |
| H  | 3.18455500  | -3.14841700 | 0.49398300  |
| H  | 4.42019700  | -0.81868400 | 0.94915000  |
| Mn | -0.63946100 | 0.41302600  | 0.45251200  |
| Cl | -0.71852100 | 0.47736200  | 2.79140300  |
| O  | -0.77143100 | 0.31927500  | -1.25240900 |
| C  | -2.00557400 | 5.07448200  | -0.23028000 |
| C  | -1.64849400 | 5.71530400  | -1.42060700 |
| C  | -2.72543200 | 5.82369000  | 0.70720700  |
| C  | -1.99302900 | 7.04011100  | -1.67812200 |
| C  | -3.08734700 | 7.14784200  | 0.46968400  |
| C  | -2.71695600 | 7.75755000  | -0.72777300 |
| C  | 0.77971600  | -4.29266400 | 0.31976500  |
| C  | 1.35491600  | -4.88086800 | -0.80855100 |
| C  | 0.66255200  | -5.09148500 | 1.46350000  |
| C  | 1.80552800  | -6.19867500 | -0.80845900 |

|   |             |             |             |
|---|-------------|-------------|-------------|
| C | 1.09384100  | -6.41623100 | 1.48506100  |
| C | 1.67083900  | -6.97018800 | 0.34352400  |
| F | -3.08684200 | 5.26917500  | 1.86995800  |
| F | -3.77713200 | 7.83850100  | 1.38321100  |
| F | -3.05558700 | 9.02670500  | -0.96413500 |
| F | -1.63901900 | 7.62363100  | -2.82803700 |
| F | -0.95271400 | 5.05487900  | -2.35753000 |
| F | 0.12505600  | -4.58468800 | 2.57738100  |
| F | 1.49451000  | -4.17229900 | -1.94002100 |
| F | 2.36196300  | -6.72449700 | -1.90657300 |
| F | 2.09533100  | -8.23554200 | 0.35455600  |
| F | 0.96925200  | -7.15376900 | 2.59235000  |
| C | 6.78940100  | -1.86318000 | -1.48321500 |
| C | 5.57235700  | -2.36037200 | -1.94183700 |
| C | 4.52108000  | -1.49009000 | -2.26971700 |
| C | 4.68426000  | -0.08815800 | -2.13595400 |
| C | 5.93052100  | 0.40157800  | -1.69010100 |
| C | 6.95858300  | -0.46524900 | -1.36387000 |
| H | 5.42630900  | -3.43414700 | -2.04192600 |
| C | 3.55495000  | 0.75372600  | -2.39409900 |
| H | 6.06641100  | 1.47439100  | -1.59102500 |
| H | 7.90857700  | -0.07286000 | -1.01027200 |
| C | 2.33592400  | 0.25822300  | -2.76309300 |
| C | 2.16431800  | -1.19558000 | -2.95896400 |
| H | 3.68178700  | 1.82042400  | -2.26198400 |
| C | 7.93649000  | -2.79664900 | -1.16815400 |
| H | 7.54831600  | -3.78959300 | -0.91025200 |
| H | 8.47527400  | -2.42969500 | -0.28514500 |
| O | 1.12042600  | -1.72743700 | -3.31882100 |
| C | 1.11790100  | 1.07457100  | -2.93204300 |
| H | 0.38664000  | 0.74052100  | -2.07494000 |
| C | 8.91998100  | -2.92168600 | -2.34689500 |
| H | 9.74744600  | -3.59443700 | -2.09542000 |
| H | 9.34049300  | -1.94446800 | -2.60922500 |
| H | 8.41348500  | -3.31574700 | -3.23492500 |
| N | 3.30213500  | -1.96395600 | -2.70086700 |
| H | 3.14751200  | -2.96323600 | -2.76464200 |
| C | 1.25040200  | 2.58692600  | -2.87505900 |
| H | 1.84490900  | 2.96113900  | -3.71922800 |
| H | 1.73035800  | 2.92114300  | -1.95000700 |
| H | 0.26456400  | 3.05402400  | -2.91962300 |
| H | 0.53418100  | 0.72334500  | -3.79033400 |
| C | 2.59497100  | 1.40040500  | 1.01775900  |
| C | 3.97152900  | 1.78339800  | 1.43685200  |

|   |              |             |             |
|---|--------------|-------------|-------------|
| C | 4.49999400   | 1.31381600  | 2.64838600  |
| C | 4.82422200   | 2.55648300  | 0.64503300  |
| C | 5.81418600   | 1.57118400  | 3.03302800  |
| C | 6.14375700   | 2.81582000  | 0.99982700  |
| C | 6.64383800   | 2.32066400  | 2.20075100  |
| F | 4.40028000   | 3.05811000  | -0.53057900 |
| F | 6.93716700   | 3.50433700  | 0.16890100  |
| F | 7.90962400   | 2.55822600  | 2.55033700  |
| F | 6.28589500   | 1.10015900  | 4.19100000  |
| F | 3.74391500   | 0.57443600  | 3.46438800  |
| C | -6.47110800  | -1.26082000 | 0.88751700  |
| C | -7.89091000  | -1.57854500 | 0.88077800  |
| H | -8.36418400  | -1.04557400 | 1.71696900  |
| C | -8.66879800  | -1.27838300 | -0.44345700 |
| H | -8.58642300  | -0.25195200 | -0.81155600 |
| C | -8.31247000  | -3.08013100 | 0.90376000  |
| H | -7.89107900  | -3.68259500 | 1.71053900  |
| C | -9.85101800  | -2.92908400 | 0.91975600  |
| H | -10.35129500 | -3.83517700 | 0.56360900  |
| H | -10.21050600 | -2.73500200 | 1.93583600  |
| C | -10.09739700 | -1.69393900 | -0.01467400 |
| H | -10.72574400 | -1.93612200 | -0.87811500 |
| H | -10.58870400 | -0.87915900 | 0.52738700  |
| C | -8.14610400  | -2.35108800 | -1.43100200 |
| H | -8.89929200  | -2.54722100 | -2.19897100 |
| C | -7.91135200  | -3.58035500 | -0.50262400 |
| H | -8.49103700  | -4.46772400 | -0.77667700 |
| C | -6.77138900  | -2.07111400 | -2.10982400 |
| H | -6.36951800  | -1.09314300 | -1.82033700 |
| H | -6.85025000  | -2.09599800 | -3.20273500 |
| C | -6.43042000  | -3.92141600 | -0.63835300 |
| O | -5.82305200  | -4.74894900 | 0.02948600  |
| N | -5.91016600  | -3.14544500 | -1.63196100 |
| H | -4.90727100  | -3.13257300 | -1.77004600 |
| C | -5.29775100  | -0.95200800 | 0.86043000  |

**<sup>5</sup>TS4-R**

|   |             |             |            |
|---|-------------|-------------|------------|
| N | -0.02208500 | 2.01352100  | 0.49919600 |
| N | 2.53298300  | 0.71246800  | 0.48489300 |
| N | 1.24550800  | -1.81365200 | 0.56118200 |
| N | -1.30288200 | -0.51610900 | 0.54953900 |
| C | -1.27799300 | 2.46015000  | 0.83204500 |
| C | -1.27268800 | 3.90192800  | 0.88909000 |
| C | -0.02147800 | 4.30876400  | 0.54153900 |

|    |             |             |             |
|----|-------------|-------------|-------------|
| C  | 0.76262200  | 3.11692000  | 0.32606500  |
| C  | 2.14868600  | 3.11943500  | 0.09770800  |
| C  | 2.96205700  | 1.99427200  | 0.19783300  |
| C  | 4.40438700  | 2.00870800  | 0.13237000  |
| C  | 4.83640600  | 0.75457400  | 0.42859900  |
| C  | 3.65596900  | -0.05444500 | 0.62115800  |
| C  | 3.67744900  | -1.44792200 | 0.80082200  |
| C  | 2.52842600  | -2.25625000 | 0.71954100  |
| C  | 2.55849800  | -3.69703400 | 0.68343900  |
| C  | 1.28225000  | -4.11442400 | 0.47427200  |
| C  | 0.45334000  | -2.93439100 | 0.41895900  |
| C  | -0.93602700 | -2.94650300 | 0.32367300  |
| C  | -1.74550700 | -1.80565500 | 0.41728200  |
| C  | -3.18130600 | -1.83748100 | 0.53847400  |
| C  | -3.58801000 | -0.56298400 | 0.78758900  |
| C  | -2.40387600 | 0.26125700  | 0.79941300  |
| H  | -2.11826100 | 4.52166600  | 1.14674700  |
| H  | 0.35290600  | 5.31998200  | 0.47670600  |
| H  | 5.01147300  | 2.87366500  | -0.09059700 |
| H  | 5.85822100  | 0.40609400  | 0.48293100  |
| H  | 3.45513600  | -4.29056400 | 0.78542300  |
| H  | 0.92458000  | -5.12876600 | 0.37358500  |
| H  | -3.79661700 | -2.72162700 | 0.46035500  |
| H  | -4.60025300 | -0.20720800 | 0.90851700  |
| Mn | 0.63333100  | 0.09053400  | 0.50061900  |
| Cl | 0.57237200  | 0.17919000  | 2.84364600  |
| O  | 0.71406300  | 0.04089900  | -1.23773500 |
| C  | 2.79340700  | 4.43785200  | -0.16340200 |
| C  | 2.57217700  | 5.12535100  | -1.36044800 |
| C  | 3.61846200  | 5.05254000  | 0.78487800  |
| C  | 3.14839800  | 6.36746100  | -1.61494800 |
| C  | 4.21025300  | 6.29188700  | 0.55100400  |
| C  | 3.97160700  | 6.95107000  | -0.65376100 |
| C  | -1.62371800 | -4.27075600 | 0.27601300  |
| C  | -2.29137500 | -4.72242200 | -0.86442600 |
| C  | -1.65814800 | -5.10014900 | 1.40319700  |
| C  | -2.97451300 | -5.93574300 | -0.89130100 |
| C  | -2.32354100 | -6.32444700 | 1.39759100  |
| C  | -2.98751000 | -6.74139200 | 0.24512200  |
| F  | 3.85706600  | 4.44835100  | 1.95404900  |
| F  | 4.99442600  | 6.85599800  | 1.47469100  |
| F  | 4.53040300  | 8.14044000  | -0.88665600 |
| F  | 2.92025900  | 6.99898200  | -2.77141800 |
| F  | 1.78525000  | 4.59191600  | -2.30624600 |

|   |              |             |             |
|---|--------------|-------------|-------------|
| F | -1.04102600  | -4.72307700 | 2.52750400  |
| F | -2.29223600  | -3.97890500 | -1.98157300 |
| F | -3.61183400  | -6.33009800 | -2.00038000 |
| F | -3.63422800  | -7.90890300 | 0.23036100  |
| F | -2.33813600  | -7.09511300 | 2.48950700  |
| C | -7.09221500  | -0.82243500 | -1.47930200 |
| C | -5.98656500  | -1.51910500 | -1.95819900 |
| C | -4.80280500  | -0.84210400 | -2.29167900 |
| C | -4.71562800  | 0.56670100  | -2.14119100 |
| C | -5.85506900  | 1.26143100  | -1.67722600 |
| C | -7.01379500  | 0.58370800  | -1.34637700 |
| H | -6.03175500  | -2.60049400 | -2.07118700 |
| C | -3.46244300  | 1.20101300  | -2.40341800 |
| H | -5.80183200  | 2.34062200  | -1.57119000 |
| H | -7.87768100  | 1.13146200  | -0.97880400 |
| C | -2.34959200  | 0.50585300  | -2.79891700 |
| C | -2.44403700  | -0.95301500 | -3.02507700 |
| H | -3.39782800  | 2.27106800  | -2.25585600 |
| C | -8.38129000  | -1.54338900 | -1.15685800 |
| H | -8.17198000  | -2.59480200 | -0.92511900 |
| H | -8.83022600  | -1.10511900 | -0.25625600 |
| O | -1.52192300  | -1.65499100 | -3.42170900 |
| C | -1.01125000  | 1.09330900  | -2.95474000 |
| H | -0.35594200  | 0.62471100  | -2.09117500 |
| C | -9.39210400  | -1.46569800 | -2.31660300 |
| H | -10.32183100 | -1.98505600 | -2.05910500 |
| H | -9.63584600  | -0.42387600 | -2.55269400 |
| H | -8.98025100  | -1.92509600 | -3.22196700 |
| N | -3.69419900  | -1.51449600 | -2.75080700 |
| H | -3.71889400  | -2.52401200 | -2.83247700 |
| C | -0.87006000  | 2.60440900  | -2.87351400 |
| H | -1.37796000  | 3.09890800  | -3.71261500 |
| H | -1.28760900  | 3.00352300  | -1.94362200 |
| H | 0.18504500   | 2.88447300  | -2.90172700 |
| H | -0.49183800  | 0.65193600  | -3.81278500 |
| C | -2.40373200  | 1.64948000  | 1.00236200  |
| C | -3.69261100  | 2.26743800  | 1.42111700  |
| C | -4.29948400  | 1.88736700  | 2.62760600  |
| C | -4.39002500  | 3.19044500  | 0.63823900  |
| C | -5.54647200  | 2.37328400  | 3.01487100  |
| C | -5.64231200  | 3.67886900  | 0.99571200  |
| C | -6.22601100  | 3.26874000  | 2.19077600  |
| F | -3.88182300  | 3.61932300  | -0.53267000 |
| F | -6.29764700  | 4.50662200  | 0.17149900  |

|   |             |             |             |
|---|-------------|-------------|-------------|
| F | -7.42932300 | 3.72603400  | 2.54247900  |
| F | -6.09765200 | 1.98265700  | 4.16760100  |
| F | -3.69028000 | 1.01688400  | 3.43649300  |
| C | 5.99504300  | -2.68791100 | 0.98789900  |
| C | 7.23912400  | -3.44154600 | 1.01209600  |
| H | 7.27430600  | -4.01389400 | 1.94938200  |
| C | 7.50244300  | -4.39606100 | -0.19958600 |
| H | 6.71248900  | -5.12489700 | -0.40098500 |
| C | 8.57612600  | -2.66247100 | 0.81580700  |
| H | 8.74145500  | -1.81978900 | 1.48958900  |
| C | 9.58811600  | -3.82433500 | 0.94213800  |
| H | 10.54595300 | -3.58091200 | 0.47159100  |
| H | 9.78898800  | -4.05009900 | 1.99474500  |
| C | 8.85229600  | -5.01626800 | 0.23680500  |
| H | 9.41174300  | -5.41213000 | -0.61716300 |
| H | 8.68754700  | -5.84653100 | 0.93148700  |
| C | 7.79000700  | -3.42998600 | -1.37579800 |
| H | 8.41664200  | -3.92807400 | -2.12058800 |
| C | 8.52731800  | -2.25053400 | -0.67313400 |
| H | 9.53560000  | -2.05962200 | -1.05452300 |
| C | 6.55414900  | -2.79168700 | -2.07859100 |
| H | 5.61264600  | -3.16670800 | -1.66072000 |
| H | 6.55320800  | -2.99711700 | -3.15515900 |
| C | 7.67573100  | -1.01373600 | -0.94401000 |
| O | 7.84754000  | 0.09463100  | -0.45232200 |
| N | 6.69767400  | -1.36295500 | -1.82798100 |
| H | 5.95053000  | -0.70662900 | -2.01718000 |
| C | 4.93496300  | -2.09867800 | 0.93936400  |

**<sup>5</sup>TS4-S**

|   |             |             |            |
|---|-------------|-------------|------------|
| N | 0.31627600  | 2.18706100  | 0.45721700 |
| N | -2.42987900 | 1.35356000  | 0.44176800 |
| N | -1.60300100 | -1.35764200 | 0.56779300 |
| N | 1.13277800  | -0.52748800 | 0.56671100 |
| C | 1.62828200  | 2.41184900  | 0.79486800 |
| C | 1.87485200  | 3.83226300  | 0.83873800 |
| C | 0.71465500  | 4.44812400  | 0.48211800 |
| C | -0.26418000 | 3.40966700  | 0.27239100 |
| C | -1.62764400 | 3.65211300  | 0.03893800 |
| C | -2.62596500 | 2.68621100  | 0.14026600 |
| C | -4.04299700 | 2.95032100  | 0.05149400 |
| C | -4.68451300 | 1.78805200  | 0.34117000 |
| C | -3.66692700 | 0.79043200  | 0.56253800 |
| C | -3.93499300 | -0.57574500 | 0.76774000 |



|    |             |             |             |
|----|-------------|-------------|-------------|
| C  | -2.94527900 | -1.57215800 | 0.72721000  |
| C  | -3.22558700 | -2.98783800 | 0.72382900  |
| C  | -2.03865500 | -3.61913300 | 0.52296400  |
| C  | -1.01725900 | -2.60258000 | 0.44892600  |
| C  | 0.34818800  | -2.85772200 | 0.36100000  |
| C  | 1.34415100  | -1.87496800 | 0.45012700  |
| C  | 2.75220200  | -2.15608500 | 0.57896400  |
| C  | 3.37458800  | -0.96957600 | 0.81502100  |
| C  | 2.35245200  | 0.04975700  | 0.81019400  |
| H  | 2.81438100  | 4.29741800  | 1.09636900  |
| H  | 0.52328100  | 5.50873700  | 0.40836200  |
| H  | -4.48342200 | 3.90753700  | -0.18586300 |
| H  | -5.74648500 | 1.59527200  | 0.38374300  |
| H  | -4.20054900 | -3.44034400 | 0.83667600  |
| H  | -1.86722000 | -4.68277700 | 0.44509300  |
| H  | 3.20297500  | -3.13529000 | 0.51265100  |
| H  | 4.43319000  | -0.79433900 | 0.93568100  |
| Mn | -0.66570300 | 0.40371400  | 0.48474800  |
| Cl | -0.61293900 | 0.53762400  | 2.82642200  |
| O  | -0.73648400 | 0.32721300  | -1.25169900 |
| C  | -2.03171800 | 5.06097700  | -0.23277200 |
| C  | -1.67758700 | 5.69743800  | -1.42638400 |
| C  | -2.75313200 | 5.81171600  | 0.70219300  |
| C  | -2.02727600 | 7.01971000  | -1.68965200 |
| C  | -3.11954000 | 7.13361300  | 0.45900200  |
| C  | -2.75255100 | 7.73900500  | -0.74166100 |
| C  | 0.79441500  | -4.28194500 | 0.32495200  |
| C  | 1.35329800  | -4.85640000 | -0.81827500 |
| C  | 0.70242200  | -5.08985900 | 1.46410000  |
| C  | 1.81493500  | -6.17004000 | -0.83687300 |
| C  | 1.14552100  | -6.41101900 | 1.46751800  |
| C  | 1.70728200  | -6.95107100 | 0.31172700  |
| F  | -3.11179200 | 5.26130400  | 1.86772000  |
| F  | -3.81080000 | 7.82605200  | 1.37006700  |
| F  | -3.09595000 | 9.00581900  | -0.98352600 |
| F  | -1.67684600 | 7.59917400  | -2.84263900 |
| F  | -0.98065500 | 5.03468800  | -2.36033300 |
| F  | 0.17926700  | -4.59591100 | 2.59032600  |
| F  | 1.46331800  | -4.13709000 | -1.94663400 |
| F  | 2.35601300  | -6.68275800 | -1.94876600 |
| F  | 2.14259200  | -8.21274100 | 0.30559100  |
| F  | 1.04626500  | -7.15842500 | 2.57066200  |
| C  | 6.74030300  | -1.90531600 | -1.42850300 |
| C  | 5.52890900  | -2.39082200 | -1.91182200 |

|   |             |             |             |
|---|-------------|-------------|-------------|
| C | 4.49361400  | -1.51029400 | -2.26382400 |
| C | 4.66786000  | -0.10790300 | -2.12827200 |
| C | 5.91245300  | 0.36933900  | -1.65943100 |
| C | 6.92269000  | -0.50730500 | -1.31016500 |
| H | 5.37374600  | -3.46310100 | -2.01334100 |
| C | 3.55611700  | 0.74429200  | -2.40834100 |
| H | 6.05884400  | 1.44099700  | -1.56467200 |
| H | 7.87012900  | -0.12506500 | -0.93913900 |
| C | 2.33659000  | 0.26277700  | -2.80746000 |
| C | 2.16103400  | -1.19098900 | -3.01915100 |
| H | 3.68966100  | 1.80931700  | -2.27115900 |
| C | 7.87077700  | -2.84853900 | -1.08537300 |
| H | 7.46844900  | -3.84049400 | -0.84646100 |
| H | 8.38472900  | -2.49095700 | -0.18387000 |
| O | 1.12870600  | -1.71456000 | -3.41932200 |
| C | 1.13088200  | 1.08578100  | -2.97756100 |
| H | 0.39975200  | 0.75217000  | -2.11126600 |
| C | 8.88911300  | -2.97171600 | -2.23455600 |
| H | 9.70422300  | -3.65122300 | -1.96204100 |
| H | 9.32364800  | -1.99559900 | -2.47734000 |
| H | 8.40770800  | -3.35694300 | -3.14019300 |
| N | 3.28331100  | -1.97121300 | -2.72631700 |
| H | 3.12051800  | -2.96878100 | -2.79657300 |
| C | 1.27185700  | 2.59774700  | -2.91414700 |
| H | 1.86931800  | 2.97862300  | -3.75357800 |
| H | 1.74906500  | 2.92436200  | -1.98470600 |
| H | 0.28747200  | 3.06857200  | -2.95635400 |
| H | 0.54134600  | 0.73741000  | -3.83307600 |
| C | 2.59471600  | 1.41872900  | 0.98777500  |
| C | 3.96979100  | 1.80977000  | 1.40539100  |
| C | 4.49689600  | 1.34982400  | 2.62156200  |
| C | 4.81961000  | 2.58577800  | 0.61347600  |
| C | 5.80746600  | 1.61933500  | 3.01009500  |
| C | 6.13591100  | 2.85631900  | 0.97217800  |
| C | 6.63487700  | 2.37086400  | 2.17744200  |
| F | 4.39801100  | 3.07741200  | -0.56718700 |
| F | 6.92768500  | 3.54573400  | 0.14051400  |
| F | 7.89748000  | 2.61940900  | 2.53074200  |
| F | 6.27789800  | 1.15812000  | 4.17243700  |
| F | 3.74306100  | 0.61121600  | 3.43960800  |
| C | -6.46862600 | -1.28588500 | 0.91126900  |
| C | -7.88639700 | -1.61152600 | 0.90114800  |
| H | -8.36388700 | -1.08388900 | 1.73833900  |
| C | -8.66382400 | -1.31105700 | -0.42347100 |

|   |              |             |             |
|---|--------------|-------------|-------------|
| H | -8.58668000  | -0.28287400 | -0.78774300 |
| C | -8.29925100  | -3.11563300 | 0.91805400  |
| H | -7.87572300  | -3.71849500 | 1.72341400  |
| C | -9.83866200  | -2.97343900 | 0.93201200  |
| H | -10.33306300 | -3.88107800 | 0.57165700  |
| H | -10.20095800 | -2.78523800 | 1.94819700  |
| C | -10.09063500 | -1.73625400 | 0.00178900  |
| H | -10.71627300 | -1.97876100 | -0.86350600 |
| H | -10.58731000 | -0.92625200 | 0.54610100  |
| C | -8.13349200  | -2.37733700 | -1.41389700 |
| H | -8.88457700  | -2.57517300 | -2.18346600 |
| C | -7.89274700  | -3.60838300 | -0.48941500 |
| H | -8.46653100  | -4.49831500 | -0.76751100 |
| C | -6.75963200  | -2.08703200 | -2.09004700 |
| H | -6.36412900  | -1.10732300 | -1.79761200 |
| H | -6.83671500  | -2.10950600 | -3.18310500 |
| C | -6.40947700  | -3.93994400 | -0.62393200 |
| O | -5.79829700  | -4.76616100 | 0.04215100  |
| N | -5.89242100  | -3.15718700 | -1.61370200 |
| H | -4.88966400  | -3.13878200 | -1.75220800 |
| C | -5.29641100  | -0.97160500 | 0.88648200  |

**<sup>3</sup>TS6-R**

|   |             |             |             |
|---|-------------|-------------|-------------|
| N | -0.40586700 | 2.26465200  | -0.44372900 |
| N | -2.60203800 | 0.44124000  | -0.43047100 |
| N | -0.78751500 | -1.71942400 | -0.78151800 |
| N | 1.39270000  | 0.11693600  | -0.80162000 |
| C | 0.69173700  | 3.01252400  | -0.80395800 |
| C | 0.35297800  | 4.41166300  | -0.73610400 |
| C | -0.92710700 | 4.49424900  | -0.28119300 |
| C | -1.41160900 | 3.14629500  | -0.12794000 |
| C | -2.73657000 | 2.82035500  | 0.17497300  |
| C | -3.28813100 | 1.54993000  | -0.00376300 |
| C | -4.69457700 | 1.23701400  | 0.08947100  |
| C | -4.84971200 | -0.04637700 | -0.33510100 |
| C | -3.52851000 | -0.54465500 | -0.63456200 |
| C | -3.24727000 | -1.87959700 | -0.97205500 |
| C | -1.94569200 | -2.41494000 | -0.99269200 |
| C | -1.64938300 | -3.81867100 | -1.11735500 |
| C | -0.30650000 | -3.95790800 | -0.94274600 |
| C | 0.23351900  | -2.63380000 | -0.74885700 |
| C | 1.59798300  | -2.33825400 | -0.65090000 |
| C | 2.12268100  | -1.04586700 | -0.71217400 |
| C | 3.52725300  | -0.73182700 | -0.80979900 |

|    |             |             |             |
|----|-------------|-------------|-------------|
| C  | 3.62390400  | 0.60858800  | -1.00910600 |
| C  | 2.28324500  | 1.14120000  | -0.99135100 |
| H  | 1.01531400  | 5.22596100  | -0.98911400 |
| H  | -1.51258100 | 5.38516500  | -0.10581700 |
| H  | -5.46723600 | 1.92031500  | 0.41066100  |
| H  | -5.77055000 | -0.60758600 | -0.41280900 |
| H  | -2.38973800 | -4.58436600 | -1.29750500 |
| H  | 0.27724100  | -4.86637600 | -0.97466100 |
| H  | 4.33250500  | -1.44672100 | -0.72983500 |
| H  | 4.52360500  | 1.19642900  | -1.11101800 |
| Mn | -0.59273600 | 0.27830100  | -0.57407600 |
| Cl | -0.81425600 | 0.46726900  | -2.89094900 |
| O  | -0.51468100 | 0.00946800  | 1.13359700  |
| C  | -3.63859200 | 3.92957400  | 0.59760800  |
| C  | -3.55186300 | 4.48297200  | 1.87755000  |
| C  | -4.59028800 | 4.47097800  | -0.27268800 |
| C  | -4.37313400 | 5.53160300  | 2.28473100  |
| C  | -5.42660200 | 5.51663100  | 0.11256900  |
| C  | -5.31416000 | 6.04872800  | 1.39622800  |
| C  | 2.53930200  | -3.48942200 | -0.55513200 |
| C  | 2.57669900  | -4.28751500 | 0.59046100  |
| C  | 3.40089900  | -3.84241100 | -1.59764700 |
| C  | 3.42673600  | -5.37847300 | 0.71993900  |
| C  | 4.27177200  | -4.92579100 | -1.49263500 |
| C  | 4.28172900  | -5.69716800 | -0.33262100 |
| F  | -4.71367000 | 3.98267000  | -1.51146200 |
| F  | -6.32679400 | 6.01702100  | -0.73890400 |
| F  | -6.10788000 | 7.05244300  | 1.77477000  |
| F  | -4.26852400 | 6.03894600  | 3.51752800  |
| F  | -2.66310500 | 4.00063400  | 2.76038200  |
| F  | 3.40878200  | -3.12866200 | -2.73121000 |
| F  | 1.80488700  | -3.96393100 | 1.65420700  |
| F  | 3.43809800  | -6.09849900 | 1.83982200  |
| F  | 5.11613900  | -6.73026200 | -0.22582800 |
| F  | 5.09059000  | -5.23420300 | -2.50401700 |
| C  | -5.23701200 | -3.57379000 | -1.31608300 |
| C  | -6.28645000 | -4.57231300 | -1.45246700 |
| H  | -6.21012800 | -5.01269700 | -2.45620000 |
| C  | -6.31860900 | -5.70941500 | -0.37833400 |
| H  | -5.38651600 | -6.26923200 | -0.26162300 |
| C  | -7.75780400 | -4.13431800 | -1.17620400 |
| H  | -8.11184800 | -3.26807900 | -1.73805300 |
| C  | -8.49526400 | -5.46198200 | -1.46506900 |
| H  | -9.47593700 | -5.49522300 | -0.98001800 |

|   |             |             |             |
|---|-------------|-------------|-------------|
| H | -8.65805700 | -5.58818600 | -2.54060900 |
| C | -7.50777500 | -6.54639800 | -0.90970700 |
| H | -7.95518100 | -7.16146700 | -0.12201400 |
| H | -7.17673300 | -7.22403000 | -1.70356400 |
| C | -6.79155500 | -4.98861600 | 0.90852800  |
| H | -7.28381700 | -5.70207900 | 1.57491300  |
| C | -7.77757400 | -3.91676800 | 0.35392000  |
| H | -8.79741500 | -3.99993800 | 0.74320100  |
| C | -5.71236300 | -4.19327900 | 1.70310300  |
| H | -4.71941600 | -4.29714600 | 1.25015500  |
| H | -5.64852700 | -4.53186100 | 2.74361700  |
| C | -7.21041400 | -2.57028000 | 0.79318100  |
| O | -7.62392200 | -1.47122500 | 0.44624000  |
| N | -6.16735400 | -2.80996000 | 1.63932700  |
| H | -5.57635100 | -2.03648900 | 1.91685900  |
| C | 6.52602300  | -1.87663500 | 1.93030300  |
| C | 6.28018900  | -0.53777300 | 1.96718400  |
| C | 4.97426900  | 0.00575500  | 2.21479000  |
| C | 5.42652700  | -2.82654000 | 2.17281300  |
| H | 7.09544900  | 0.16090700  | 1.78520900  |
| C | 3.39063700  | 1.84546500  | 2.36172600  |
| H | 3.43606200  | -2.90745300 | 2.60271600  |
| C | 2.32655900  | 0.94083800  | 2.58823400  |
| C | 2.60361600  | -0.43110600 | 2.62956700  |
| H | 3.19616000  | 2.90847600  | 2.32213900  |
| C | 7.88274600  | -2.47369000 | 1.66874300  |
| H | 7.77702700  | -3.26672300 | 0.91867500  |
| H | 8.54334500  | -1.70543700 | 1.24922900  |
| C | 0.91905200  | 1.38888700  | 2.75195400  |
| H | 0.30118600  | 0.87386500  | 1.84742200  |
| C | 8.51420700  | -3.07839800 | 2.93702600  |
| H | 9.49400400  | -3.51209800 | 2.70836600  |
| H | 8.64972100  | -2.31314100 | 3.70985600  |
| H | 7.87169700  | -3.86816900 | 3.33558900  |
| C | 0.61071200  | 2.87379800  | 2.76579100  |
| H | 1.04455300  | 3.34919800  | 3.65647000  |
| H | 1.01135800  | 3.38328100  | 1.88654800  |
| H | -0.46832800 | 3.03919200  | 2.78751700  |
| H | 0.42709500  | 0.85684800  | 3.57539700  |
| C | 1.96541200  | 2.50220500  | -1.07022900 |
| C | 3.06856300  | 3.44641300  | -1.39791700 |
| C | 3.72136500  | 3.37429100  | -2.63607100 |
| C | 3.52633500  | 4.41739300  | -0.50081900 |
| C | 4.77868000  | 4.22021900  | -2.96462300 |

|   |             |             |             |
|---|-------------|-------------|-------------|
| C | 4.57697800  | 5.27761400  | -0.80746200 |
| C | 5.20689800  | 5.17692400  | -2.04624200 |
| C | -4.33322900 | -2.77436100 | -1.18611200 |
| F | 2.94993800  | 4.55318800  | 0.70819300  |
| F | 4.98689100  | 6.19096000  | 0.07972200  |
| F | 6.21702400  | 5.99368000  | -2.35081700 |
| F | 5.38049700  | 4.12363800  | -4.15337900 |
| F | 3.33969900  | 2.46671500  | -3.53906900 |
| C | 3.90684300  | -0.89772400 | 2.44398200  |
| H | 1.78962700  | -1.14100300 | 2.75355000  |
| C | 4.68366100  | 1.38306900  | 2.19071500  |
| H | 5.49519900  | 2.08621400  | 2.01899400  |
| N | 4.19135800  | -2.25044300 | 2.44341100  |
| O | 5.55036400  | -4.05276500 | 2.13795800  |

**<sup>3</sup>TS6-S**

|   |             |             |             |
|---|-------------|-------------|-------------|
| N | -0.22226200 | 2.48084800  | 0.41719100  |
| N | -2.64216800 | 0.96608000  | 0.34824300  |
| N | -1.13938700 | -1.41794100 | 0.73105500  |
| N | 1.26646600  | 0.10986100  | 0.79660500  |
| C | 0.95837800  | 3.07314400  | 0.80191700  |
| C | 0.81061400  | 4.50508900  | 0.74391000  |
| C | -0.44045500 | 4.76155400  | 0.27298600  |
| C | -1.09720900 | 3.49174700  | 0.09726500  |
| C | -2.44808600 | 3.34788000  | -0.23174100 |
| C | -3.16563100 | 2.15839900  | -0.08331000 |
| C | -4.59648800 | 2.03031700  | -0.22448000 |
| C | -4.92211800 | 0.77000800  | 0.17146000  |
| C | -3.68971500 | 0.10392000  | 0.50954600  |
| C | -3.59900500 | -1.25686600 | 0.85829200  |
| C | -2.38289200 | -1.95723500 | 0.92758000  |
| C | -2.27713400 | -3.38816300 | 1.07139000  |
| C | -0.96163300 | -3.69973400 | 0.90994900  |
| C | -0.24847700 | -2.45981900 | 0.71601400  |
| C | 1.14410700  | -2.34931300 | 0.63319500  |
| C | 1.83597100  | -1.13906700 | 0.70823600  |
| C | 3.26881400  | -1.01569400 | 0.82522200  |
| C | 3.54059600  | 0.29848300  | 1.03551300  |
| C | 2.28311900  | 1.00578500  | 1.00373900  |
| H | 1.57151600  | 5.22160700  | 1.01502100  |
| H | -0.89890000 | 5.72454300  | 0.10054800  |
| H | -5.26123200 | 2.81303300  | -0.56002600 |
| H | -5.89719800 | 0.30742300  | 0.21751400  |
| H | -3.09628500 | -4.06900400 | 1.25601000  |

|    |             |             |             |
|----|-------------|-------------|-------------|
| H  | -0.50773000 | -4.67884900 | 0.95739600  |
| H  | 3.97211600  | -1.83158500 | 0.75063600  |
| H  | 4.50906300  | 0.76067500  | 1.15335300  |
| Mn | -0.67353700 | 0.53354500  | 0.53379900  |
| Cl | -0.91692100 | 0.75155000  | 2.84572400  |
| O  | -0.59852700 | 0.25906600  | -1.17288000 |
| C  | -3.18564400 | 4.57180100  | -0.65584100 |
| C  | -2.96939100 | 5.14730000  | -1.91103000 |
| C  | -4.10309500 | 5.20510900  | 0.18928700  |
| C  | -3.63322600 | 6.30229900  | -2.31770700 |
| C  | -4.78397200 | 6.35770600  | -0.19677500 |
| C  | -4.54470600 | 6.90821000  | -1.45494500 |
| C  | 1.92212300  | -3.61639500 | 0.53805900  |
| C  | 1.86101300  | -4.40461900 | -0.61325000 |
| C  | 2.71631500  | -4.09076000 | 1.58560400  |
| C  | 2.55422500  | -5.60111100 | -0.74347800 |
| C  | 3.43088800  | -5.28302500 | 1.48034800  |
| C  | 3.34649800  | -6.04106900 | 0.31458700  |
| F  | -4.34667600 | 4.70282500  | 1.40495900  |
| F  | -5.65599200 | 6.94199000  | 0.63081800  |
| F  | -5.18927500 | 8.01355100  | -1.83387400 |
| F  | -3.40715100 | 6.82720500  | -3.52650100 |
| F  | -2.10546400 | 4.58452100  | -2.76983200 |
| F  | 2.81097600  | -3.39123200 | 2.72419400  |
| F  | 1.15307600  | -3.96986100 | -1.68218600 |
| F  | 2.47934700  | -6.30725900 | -1.86961800 |
| F  | 4.03292200  | -7.17752700 | 0.20708700  |
| F  | 4.19013500  | -5.70679100 | 2.49633800  |
| C  | 6.13471600  | -2.57183400 | -1.88558900 |
| C  | 6.07428900  | -1.21177200 | -1.91262700 |
| C  | 4.85826800  | -0.49323200 | -2.17217700 |
| C  | 4.91938700  | -3.36106300 | -2.15149200 |
| H  | 6.97455100  | -0.63229800 | -1.71349600 |
| C  | 3.54346700  | 1.54718300  | -2.32488800 |
| H  | 2.94260300  | -3.16642800 | -2.60747600 |
| C  | 2.36944200  | 0.79816000  | -2.57487200 |
| C  | 2.45669300  | -0.59862800 | -2.62315700 |
| H  | 3.49566100  | 2.62660200  | -2.27840200 |
| C  | 7.39348800  | -3.35056100 | -1.61256100 |
| H  | 7.17031400  | -4.12696100 | -0.87091400 |
| H  | 8.14717300  | -2.68279900 | -1.17822100 |
| C  | 1.03950400  | 1.43532100  | -2.75812100 |
| H  | 0.34138300  | 1.00621700  | -1.86784900 |
| C  | 7.95330800  | -4.02707000 | -2.87826900 |

|   |             |             |             |
|---|-------------|-------------|-------------|
| H | 8.86165100  | -4.59198500 | -2.64132300 |
| H | 8.20218300  | -3.28219700 | -3.64279500 |
| H | 7.21441600  | -4.71903200 | -3.29129100 |
| C | 0.93569700  | 2.94839700  | -2.76529700 |
| H | 1.44540600  | 3.36619700  | -3.64457500 |
| H | 1.38554000  | 3.39377300  | -1.87516500 |
| H | -0.11070200 | 3.25788900  | -2.80324300 |
| H | 0.49387800  | 0.97966200  | -3.59347400 |
| C | 2.14876000  | 2.39581600  | 1.08480100  |
| C | 3.36279400  | 3.18320300  | 1.43389100  |
| C | 3.97982000  | 3.02229200  | 2.68196500  |
| C | 3.96086900  | 4.08541400  | 0.54769400  |
| C | 5.13530300  | 3.71871600  | 3.03040800  |
| C | 5.11201600  | 4.79683700  | 0.87409800  |
| C | 5.70247900  | 4.61090900  | 2.12245800  |
| F | 3.42788400  | 4.29783800  | -0.67019700 |
| F | 5.65503000  | 5.64829200  | -0.00314100 |
| F | 6.80770600  | 5.28467300  | 2.44610600  |
| F | 5.69937600  | 3.54076800  | 4.22819900  |
| F | 3.46544200  | 2.17264300  | 3.57533400  |
| C | 3.68086700  | -1.24078400 | -2.42382300 |
| H | 1.55538900  | -1.18969500 | -2.76505000 |
| C | 4.75826600  | 0.91069900  | -2.13967200 |
| H | 5.65581800  | 1.49474500  | -1.95047000 |
| N | 3.77795400  | -2.61960300 | -2.43209100 |
| O | 4.87466200  | -4.59267100 | -2.12754700 |
| C | -5.86337900 | -2.58498300 | 1.09903300  |
| C | -7.14730600 | -3.26734900 | 1.15487500  |
| H | -7.76357100 | -2.77022800 | 1.91664600  |
| C | -7.94823600 | -3.36996000 | -0.18549400 |
| H | -8.13409200 | -2.41935200 | -0.69309300 |
| C | -7.15474200 | -4.80912200 | 1.39182700  |
| H | -6.60571800 | -5.16063800 | 2.26724600  |
| C | -8.67796300 | -5.07254100 | 1.41134100  |
| H | -8.91161900 | -6.11915300 | 1.19209800  |
| H | -9.09781400 | -4.84327900 | 2.39643000  |
| C | -9.22368200 | -4.08829600 | 0.31912700  |
| H | -9.74573700 | -4.60554300 | -0.49259100 |
| H | -9.92591300 | -3.36753600 | 0.75085800  |
| C | -7.13766600 | -4.38945000 | -1.02350700 |
| H | -7.79395300 | -4.88249100 | -1.74577700 |
| C | -6.60473800 | -5.37260100 | 0.06176300  |
| H | -6.92130500 | -6.41117100 | -0.07830500 |
| C | -5.87251900 | -3.84780000 | -1.75481900 |



|   |             |             |             |
|---|-------------|-------------|-------------|
| H | -5.75227300 | -2.76820100 | -1.60676900 |
| H | -5.91828400 | -4.04021100 | -2.83292600 |
| C | -5.08414100 | -5.32131400 | -0.04823200 |
| O | -4.29235300 | -5.85518800 | 0.71806800  |
| N | -4.76726500 | -4.57888600 | -1.14817300 |
| H | -3.80129700 | -4.31562300 | -1.29782900 |
| C | -4.81361200 | -1.98046400 | 1.02392400  |

**<sup>5</sup>TS6-R**

|    |             |             |             |
|----|-------------|-------------|-------------|
| N  | -0.39609800 | 2.26266000  | -0.43151200 |
| N  | -2.60343900 | 0.43967600  | -0.44512700 |
| N  | -0.80896500 | -1.71356000 | -0.76603200 |
| N  | 1.38966100  | 0.09711500  | -0.79020200 |
| C  | 0.70560900  | 3.00282100  | -0.78682400 |
| C  | 0.37652700  | 4.40563100  | -0.72208200 |
| C  | -0.90579400 | 4.49488400  | -0.27377800 |
| C  | -1.39265400 | 3.14656000  | -0.12123500 |
| C  | -2.72502800 | 2.82237000  | 0.17261200  |
| C  | -3.28267400 | 1.56014000  | -0.01611700 |
| C  | -4.69160200 | 1.25788200  | 0.07334900  |
| C  | -4.85853700 | -0.02224200 | -0.35469000 |
| C  | -3.54113500 | -0.53306200 | -0.65066000 |
| C  | -3.26729200 | -1.87205300 | -0.97840400 |
| C  | -1.96871200 | -2.41211200 | -0.97511400 |
| C  | -1.67641500 | -3.81725200 | -1.07464500 |
| C  | -0.33542500 | -3.96025500 | -0.88756800 |
| C  | 0.21301200  | -2.63898400 | -0.71432500 |
| C  | 1.57627300  | -2.35412700 | -0.62264400 |
| C  | 2.11381400  | -1.06372500 | -0.69798400 |
| C  | 3.52028500  | -0.76264900 | -0.80456900 |
| C  | 3.62375400  | 0.57780800  | -1.00417500 |
| C  | 2.28473200  | 1.11684800  | -0.98105900 |
| H  | 1.04386200  | 5.21643500  | -0.97306700 |
| H  | -1.48865700 | 5.38821200  | -0.10220100 |
| H  | -5.45867300 | 1.94665100  | 0.39603000  |
| H  | -5.78442700 | -0.57491400 | -0.43471400 |
| H  | -2.41846300 | -4.58257900 | -1.24946900 |
| H  | 0.24232800  | -4.87294400 | -0.90001100 |
| H  | 4.32120000  | -1.48260000 | -0.72661400 |
| H  | 4.52657800  | 1.16028800  | -1.10886300 |
| Mn | -0.61310500 | 0.25655400  | -0.59551100 |
| Cl | -0.75810700 | 0.54093900  | -2.90379400 |
| O  | -0.52465000 | 0.03266400  | 1.15336700  |
| C  | -3.62091600 | 3.93496200  | 0.59983500  |

|   |             |             |             |
|---|-------------|-------------|-------------|
| C | -3.52975900 | 4.48104900  | 1.88267700  |
| C | -4.56661200 | 4.48929600  | -0.26871900 |
| C | -4.34205700 | 5.53488600  | 2.29438900  |
| C | -5.39359700 | 5.54064700  | 0.12111000  |
| C | -5.27745600 | 6.06508300  | 1.40758400  |
| C | 2.51031600  | -3.51107400 | -0.52279500 |
| C | 2.55809200  | -4.29479500 | 0.63207600  |
| C | 3.35639800  | -3.88116200 | -1.57199700 |
| C | 3.40405900  | -5.38873800 | 0.76364500  |
| C | 4.22218400  | -4.96838800 | -1.46540900 |
| C | 4.24294800  | -5.72549800 | -0.29616500 |
| F | -4.69325200 | 4.00838200  | -1.51015400 |
| F | -6.28840400 | 6.05354200  | -0.72862500 |
| F | -6.06248100 | 7.07391700  | 1.79055600  |
| F | -4.23431700 | 6.03490900  | 3.52980800  |
| F | -2.64629500 | 3.98570900  | 2.76296100  |
| F | 3.35305200  | -3.18066800 | -2.71377700 |
| F | 1.80192300  | -3.95393400 | 1.70134500  |
| F | 3.42719300  | -6.09426000 | 1.89254600  |
| F | 5.07306700  | -6.76178000 | -0.18736400 |
| F | 5.02584700  | -5.29385500 | -2.48351200 |
| C | 6.53479600  | -1.87804900 | 1.87916300  |
| C | 6.29478500  | -0.53744000 | 1.91407100  |
| C | 4.99671700  | 0.01189800  | 2.18302400  |
| C | 5.43618400  | -2.82217100 | 2.14703500  |
| H | 7.10960000  | 0.15689800  | 1.71434300  |
| C | 3.42599500  | 1.86009700  | 2.35932400  |
| H | 3.45335800  | -2.89286700 | 2.61248100  |
| C | 2.35960300  | 0.96096800  | 2.60341100  |
| C | 2.63188700  | -0.41328300 | 2.64049300  |
| H | 3.23572800  | 2.92397000  | 2.32588400  |
| C | 7.88428200  | -2.48142500 | 1.59672900  |
| H | 7.76215100  | -3.27922000 | 0.85423900  |
| H | 8.53969800  | -1.71832100 | 1.16007900  |
| C | 0.95612800  | 1.41269800  | 2.77979800  |
| H | 0.33475300  | 0.90301700  | 1.89022700  |
| C | 8.53683300  | -3.07989000 | 2.85744000  |
| H | 9.51084000  | -3.51837000 | 2.61370600  |
| H | 8.68894900  | -2.30998100 | 3.62249900  |
| H | 7.89905700  | -3.86478400 | 3.27285000  |
| C | 0.65527600  | 2.90075100  | 2.79257700  |
| H | 1.09464600  | 3.38226200  | 3.67724300  |
| H | 1.04994500  | 3.40401200  | 1.90693800  |
| H | -0.42353600 | 3.06921600  | 2.81868300  |

|   |             |             |             |
|---|-------------|-------------|-------------|
| H | 0.47901800  | 0.89018800  | 3.61844800  |
| C | 1.97544000  | 2.48096600  | -1.05566100 |
| C | 3.08285600  | 3.41622700  | -1.39575900 |
| C | 3.72797600  | 3.32907900  | -2.63726700 |
| C | 3.55046500  | 4.39397800  | -0.51109300 |
| C | 4.78786200  | 4.16606000  | -2.97995300 |
| C | 4.60466400  | 5.24468400  | -0.83191700 |
| C | 5.22703700  | 5.12872200  | -2.07310700 |
| F | 2.98161200  | 4.54642900  | 0.69911900  |
| F | 5.02459100  | 6.16412500  | 0.04415500  |
| F | 6.24001900  | 5.93669400  | -2.39110500 |
| F | 5.38183300  | 4.05501700  | -4.17136500 |
| F | 3.33579400  | 2.41628600  | -3.53025600 |
| C | 3.92897400  | -0.88604500 | 2.43508000  |
| H | 1.81593900  | -1.11846200 | 2.77797800  |
| C | 4.71222600  | 1.39190800  | 2.16363300  |
| H | 5.52470000  | 2.09060400  | 1.97839900  |
| N | 4.20814800  | -2.24004300 | 2.43470300  |
| O | 5.55580300  | -4.04913300 | 2.11841700  |
| C | -5.26326800 | -3.55810200 | -1.32242800 |
| C | -6.31835800 | -4.55075100 | -1.45708800 |
| H | -6.24049200 | -4.99806200 | -2.45763700 |
| C | -6.36262500 | -5.68069800 | -0.37577700 |
| H | -5.43477300 | -6.24589600 | -0.25142600 |
| C | -7.78795400 | -4.10121800 | -1.18995200 |
| H | -8.13380600 | -3.23629300 | -1.75887800 |
| C | -8.53289500 | -5.42583900 | -1.47356600 |
| H | -9.51577300 | -5.44951600 | -0.99246200 |
| H | -8.69201900 | -5.55778900 | -2.54896100 |
| C | -7.55494100 | -6.51318800 | -0.90718900 |
| H | -8.00972900 | -7.12037500 | -0.11763300 |
| H | -7.22491100 | -7.19790200 | -1.69536700 |
| C | -6.83653100 | -4.94871100 | 0.90439900  |
| H | -7.33666900 | -5.65476400 | 1.57278700  |
| C | -7.81274400 | -3.87371100 | 0.33863800  |
| H | -8.83479100 | -3.94740400 | 0.72400300  |
| C | -5.75580300 | -4.15579400 | 1.69926400  |
| H | -4.76133600 | -4.26930800 | 1.25194700  |
| H | -5.69929700 | -4.48813000 | 2.74218500  |
| C | -7.23829300 | -2.52835500 | 0.77200000  |
| O | -7.64266100 | -1.42873500 | 0.41603700  |
| N | -6.20089000 | -2.76986100 | 1.62438400  |
| H | -5.60695600 | -1.99876800 | 1.90230500  |
| C | -4.35575700 | -2.76264900 | -1.19310000 |

**<sup>5</sup>TS6-S**

|    |             |             |             |
|----|-------------|-------------|-------------|
| N  | -0.19592500 | 2.47500700  | 0.40137100  |
| N  | -2.63514200 | 0.97431500  | 0.36631400  |
| N  | -1.15983900 | -1.40697100 | 0.71585000  |
| N  | 1.26788200  | 0.08178000  | 0.78676000  |
| C  | 0.99111200  | 3.05410700  | 0.77880300  |
| C  | 0.85955700  | 4.48885800  | 0.72530800  |
| C  | -0.39297300 | 4.75807200  | 0.26461100  |
| C  | -1.05837300 | 3.49145100  | 0.09081500  |
| C  | -2.41805300 | 3.35732700  | -0.22344700 |
| C  | -3.14586500 | 2.17967700  | -0.06319400 |
| C  | -4.57928200 | 2.07023200  | -0.19541800 |
| C  | -4.92100400 | 0.81555100  | 0.20234700  |
| C  | -3.69576700 | 0.13123900  | 0.53096000  |
| C  | -3.61816900 | -1.23336000 | 0.86639000  |
| C  | -2.40787700 | -1.94392000 | 0.90908700  |
| C  | -2.31197700 | -3.37604700 | 1.02796200  |
| C  | -0.99958300 | -3.69679000 | 0.85640000  |
| C  | -0.27309900 | -2.46451500 | 0.68357400  |
| C  | 1.11717000  | -2.37062600 | 0.60895400  |
| C  | 1.82641000  | -1.16687400 | 0.69633900  |
| C  | 3.26015900  | -1.06254400 | 0.81851800  |
| C  | 3.54495800  | 0.24990200  | 1.02496600  |
| C  | 2.29279900  | 0.96876400  | 0.98989400  |
| H  | 1.62867800  | 5.19769800  | 0.99323700  |
| H  | -0.84480800 | 5.72519300  | 0.09811200  |
| H  | -5.23477300 | 2.86168700  | -0.52845700 |
| H  | -5.90220100 | 0.36659400  | 0.25357100  |
| H  | -3.13581200 | -4.05338600 | 1.20502700  |
| H  | -0.55658700 | -4.68151600 | 0.88537500  |
| H  | 3.95472800  | -1.88596900 | 0.74529500  |
| H  | 4.51807900  | 0.70254600  | 1.14126100  |
| Mn | -0.68843300 | 0.51372800  | 0.55588900  |
| Cl | -0.84239400 | 0.82014000  | 2.86034400  |
| O  | -0.59447900 | 0.27272800  | -1.19070200 |
| C  | -3.14569800 | 4.58795500  | -0.64597200 |
| C  | -2.93396600 | 5.15452000  | -1.90599700 |
| C  | -4.04487500 | 5.23791900  | 0.20598200  |
| C  | -3.58543900 | 6.31721100  | -2.31081100 |
| C  | -4.71274200 | 6.39877100  | -0.17801400 |
| C  | -4.47870600 | 6.94016900  | -1.44111500 |
| C  | 1.88199400  | -3.64596600 | 0.51445600  |
| C  | 1.82812100  | -4.42759600 | -0.64151400 |

|   |             |             |             |
|---|-------------|-------------|-------------|
| C | 2.65815800  | -4.13269400 | 1.56987800  |
| C | 2.51198200  | -5.62985000 | -0.76850700 |
| C | 3.36209100  | -5.33145300 | 1.46838600  |
| C | 3.28543200  | -6.08288100 | 0.29781800  |
| F | -4.28307600 | 4.74417400  | 1.42627700  |
| F | -5.56746000 | 6.99926200  | 0.65602300  |
| F | -5.11119600 | 8.05305200  | -1.81824800 |
| F | -3.36498300 | 6.83338200  | -3.52430400 |
| F | -2.08805000 | 4.57474100  | -2.77076800 |
| F | 2.74428700  | -3.43912100 | 2.71276900  |
| F | 1.13770500  | -3.98113600 | -1.71680600 |
| F | 2.44654800  | -6.32930900 | -1.89933500 |
| F | 3.96239800  | -7.22536200 | 0.19342100  |
| F | 4.10361000  | -5.76766200 | 2.49211700  |
| C | 6.11899600  | -2.59103500 | -1.84078300 |
| C | 6.07099700  | -1.22996000 | -1.87303900 |
| C | 4.86615600  | -0.50236200 | -2.15262100 |
| C | 4.90071800  | -3.37015900 | -2.12249000 |
| H | 6.97366900  | -0.65801600 | -1.66331100 |
| C | 3.57497800  | 1.55015200  | -2.34055700 |
| H | 2.93170000  | -3.15942600 | -2.60408100 |
| C | 2.39490900  | 0.81120400  | -2.59817000 |
| C | 2.46989300  | -0.58782800 | -2.63453100 |
| H | 3.53714600  | 2.63028500  | -2.30659200 |
| C | 7.36694700  | -3.37962500 | -1.54826300 |
| H | 7.12632700  | -4.15372800 | -0.80967800 |
| H | 8.11952800  | -2.71772500 | -1.10319800 |
| C | 1.07167000  | 1.45704400  | -2.79072500 |
| H | 0.37331500  | 1.03470000  | -1.91296900 |
| C | 7.94013500  | -4.06177900 | -2.80510100 |
| H | 8.84010800  | -4.63391500 | -2.55400200 |
| H | 8.20661800  | -3.31960400 | -3.56628600 |
| H | 7.20178100  | -4.74792000 | -3.22863100 |
| C | 0.98314500  | 2.97253600  | -2.79744300 |
| H | 1.49890800  | 3.39222500  | -3.67230900 |
| H | 1.43112800  | 3.41076000  | -1.90266200 |
| H | -0.06087900 | 3.29068000  | -2.83727100 |
| H | 0.53778500  | 1.01057500  | -3.63905700 |
| C | 2.17382500  | 2.36117400  | 1.06339800  |
| C | 3.39473100  | 3.13466400  | 1.42065600  |
| C | 4.00541100  | 2.95840100  | 2.67010500  |
| C | 4.00391700  | 4.03957300  | 0.54468100  |
| C | 5.16578800  | 3.64134100  | 3.02860900  |
| C | 5.16078400  | 4.73689400  | 0.88128100  |

|   |             |             |             |
|---|-------------|-------------|-------------|
| C | 5.74500000  | 4.53523700  | 2.13006500  |
| F | 3.47744900  | 4.26932500  | -0.67245000 |
| F | 5.71474700  | 5.59057600  | 0.01314200  |
| F | 6.85526800  | 5.19584300  | 2.46324600  |
| F | 5.72316400  | 3.44865500  | 4.22724200  |
| F | 3.47964100  | 2.10767500  | 3.55562800  |
| C | 3.68475700  | -1.24000900 | -2.41742400 |
| H | 1.56369000  | -1.17005200 | -2.78167900 |
| C | 4.77965400  | 0.90404100  | -2.13238500 |
| H | 5.68108800  | 1.48022000  | -1.93731600 |
| N | 3.76944400  | -2.61980000 | -2.41804500 |
| O | 4.84642300  | -4.60158300 | -2.09877800 |
| C | -5.89283800 | -2.54143800 | 1.11493500  |
| C | -7.18161400 | -3.21368100 | 1.17929000  |
| H | -7.78064000 | -2.72600400 | 1.96066400  |
| C | -8.00619700 | -3.28487500 | -0.14874700 |
| H | -8.19305500 | -2.32352600 | -0.63529200 |
| C | -7.19720900 | -4.75957000 | 1.38747300  |
| H | -6.63619800 | -5.13157700 | 2.24667800  |
| C | -8.72190000 | -5.01189400 | 1.42805600  |
| H | -8.96738600 | -6.05224100 | 1.19257400  |
| H | -9.12307800 | -4.79880400 | 2.42448000  |
| C | -9.27850300 | -4.00250500 | 0.36464800  |
| H | -9.81907900 | -4.49982200 | -0.44737600 |
| H | -9.96693400 | -3.28454000 | 0.82246000  |
| C | -7.21858500 | -4.29485700 | -1.01956500 |
| H | -7.89144800 | -4.76968000 | -1.73875600 |
| C | -6.67402400 | -5.30168200 | 0.03789500  |
| H | -7.00010400 | -6.33534200 | -0.11601900 |
| C | -5.96267500 | -3.74915600 | -1.76349600 |
| H | -5.83161700 | -2.67332000 | -1.59812900 |
| H | -6.02875300 | -3.92157000 | -2.84388700 |
| C | -5.15519800 | -5.25855100 | -0.09773400 |
| O | -4.35383300 | -5.81121200 | 0.64511700  |
| N | -4.85244100 | -4.49898500 | -1.18972000 |
| H | -3.88728800 | -4.24180300 | -1.35424900 |
| C | -4.83771800 | -1.94674100 | 1.03535600  |

**<sup>3</sup>TS5-R**

|   |             |             |             |
|---|-------------|-------------|-------------|
| N | 0.61971800  | -1.29390700 | -0.15656900 |
| N | -2.18569800 | -1.49744800 | 0.07351500  |
| N | -2.35858400 | 1.31641800  | 0.19744400  |
| N | 0.43816200  | 1.49952600  | -0.03259800 |
| C | 1.93017500  | -1.05803600 | 0.16492600  |

|    |             |             |             |
|----|-------------|-------------|-------------|
| C  | 2.68392700  | -2.27512900 | 0.03047100  |
| C  | 1.82088300  | -3.22905200 | -0.42420500 |
| C  | 0.51245500  | -2.62526900 | -0.48281100 |
| C  | -0.69196300 | -3.31696100 | -0.64719600 |
| C  | -1.94126600 | -2.79029200 | -0.30271500 |
| C  | -3.14265900 | -3.57134600 | -0.12149100 |
| C  | -4.08236400 | -2.74034900 | 0.40598100  |
| C  | -3.49093600 | -1.42349700 | 0.48351400  |
| C  | -4.17806800 | -0.24083700 | 0.78046500  |
| C  | -3.64724900 | 1.03742900  | 0.56205700  |
| C  | -4.42221100 | 2.25602500  | 0.52096000  |
| C  | -3.59649200 | 3.24093800  | 0.07106600  |
| C  | -2.29165400 | 2.65037300  | -0.10922600 |
| C  | -1.12269100 | 3.36267900  | -0.39885100 |
| C  | 0.16127400  | 2.82410300  | -0.26456500 |
| C  | 1.38082800  | 3.58502600  | -0.14312800 |
| C  | 2.35782800  | 2.71682800  | 0.24603100  |
| C  | 1.76698900  | 1.40601900  | 0.27420200  |
| C  | 2.47436400  | 0.20505600  | 0.45604000  |
| H  | 3.73115800  | -2.37128500 | 0.26853600  |
| H  | 2.03582200  | -4.26779000 | -0.62797400 |
| H  | -3.23132300 | -4.62833500 | -0.32841900 |
| H  | -5.09394400 | -2.98660200 | 0.69280900  |
| H  | -5.47149400 | 2.33161500  | 0.76750800  |
| H  | -3.83216000 | 4.28314800  | -0.09032200 |
| H  | 1.46535600  | 4.64951300  | -0.30131700 |
| H  | 3.40003100  | 2.91607000  | 0.45140000  |
| Mn | -0.86777900 | 0.00591900  | -0.03520400 |
| Cl | -0.64868600 | -0.09864500 | 2.33909600  |
| O  | -1.16435000 | 0.08402500  | -1.71999100 |
| C  | -5.59246300 | -0.32469600 | 1.23962500  |
| C  | -6.62247500 | -0.76967400 | 0.40489300  |
| C  | -5.94359300 | 0.07934600  | 2.53263200  |
| C  | -7.94504800 | -0.83230800 | 0.83711600  |
| C  | -7.26099300 | 0.03249700  | 2.98412000  |
| C  | -8.26354200 | -0.42735800 | 2.13218500  |
| C  | -0.63984500 | -4.73615000 | -1.09984900 |
| C  | -0.99651200 | -5.07239200 | -2.40861300 |
| C  | -0.25664900 | -5.77488000 | -0.24703300 |
| C  | -0.96998300 | -6.38936600 | -2.86153700 |
| C  | -0.21905800 | -7.09953100 | -0.67847700 |
| C  | -0.57964400 | -7.40485100 | -1.99005400 |
| C  | -1.26305200 | 4.79663900  | -0.77596200 |
| C  | -1.76069800 | 5.14239600  | -2.03686300 |

|   |             |             |             |
|---|-------------|-------------|-------------|
| C | -0.92937100 | 5.83862700  | 0.09302200  |
| C | -1.91178600 | 6.47208200  | -2.42480500 |
| C | -1.06527400 | 7.17485900  | -0.27600000 |
| C | -1.56044400 | 7.49005900  | -1.54007000 |
| F | -6.34923000 | -1.15194700 | -0.85031500 |
| F | -8.90890500 | -1.26606200 | 0.01739300  |
| F | -9.52849600 | -0.47899400 | 2.55547300  |
| F | -7.56873300 | 0.42190700  | 4.22545400  |
| F | -5.00316600 | 0.52977100  | 3.36899700  |
| F | 0.09111400  | -5.50593300 | 1.01578100  |
| F | 0.15289200  | -8.07679400 | 0.15435700  |
| F | -0.54870900 | -8.67075900 | -2.41267600 |
| F | -1.31226700 | -6.68462400 | -4.12009800 |
| F | -1.37272900 | -4.11268400 | -3.26553000 |
| F | -0.45640500 | 5.56395300  | 1.31709000  |
| F | -2.11146100 | 4.18528300  | -2.90049600 |
| F | -2.38879300 | 6.77790900  | -3.63571000 |
| F | -1.69870400 | 8.76771700  | -1.90267900 |
| F | -0.73287900 | 8.15322800  | 0.57417400  |
| C | 3.79939600  | 0.27455600  | 0.95164400  |
| C | 4.84027000  | 0.29838000  | 1.57226400  |
| C | 5.97456700  | 0.26386600  | 2.47392900  |
| H | 6.87612100  | 0.62166200  | 1.95834500  |
| C | 5.78955300  | 1.01910400  | 3.83256600  |
| H | 5.54871700  | 2.08227000  | 3.74677600  |
| C | 6.24066200  | -1.11088900 | 3.16228300  |
| H | 6.37422400  | -1.96063200 | 2.48955300  |
| C | 7.46866100  | -0.74805100 | 4.02922600  |
| H | 7.58788700  | -1.43585500 | 4.87236500  |
| H | 8.38945000  | -0.79417000 | 3.43717400  |
| C | 7.16190400  | 0.72112200  | 4.48534100  |
| H | 7.12551300  | 0.82657900  | 5.57444200  |
| H | 7.92343200  | 1.41645700  | 4.11579300  |
| C | 4.72404900  | 0.18200400  | 4.58848600  |
| H | 4.86941700  | 0.29895000  | 5.66601000  |
| C | 5.02761100  | -1.26669600 | 4.10661900  |
| H | 5.26287600  | -1.96492300 | 4.91692600  |
| C | 3.22418700  | 0.42866500  | 4.24178400  |
| H | 3.10272400  | 1.22774300  | 3.50023800  |
| H | 2.64722900  | 0.70820300  | 5.13018900  |
| C | 3.73583200  | -1.75475400 | 3.43941300  |
| O | 3.62001300  | -2.79623100 | 2.80577700  |
| N | 2.75873400  | -0.84418800 | 3.70778000  |
| H | 1.84185800  | -0.92562200 | 3.27530900  |



|   |             |             |             |
|---|-------------|-------------|-------------|
| C | 6.82581100  | 0.77452800  | -1.33486100 |
| C | 5.84300400  | 1.67771100  | -1.72872000 |
| C | 4.62033600  | 1.22143100  | -2.24309800 |
| C | 4.37365900  | -0.16639700 | -2.38464200 |
| C | 5.38810400  | -1.06698900 | -1.99987600 |
| C | 6.58547300  | -0.60955000 | -1.48127300 |
| H | 6.01031800  | 2.74722500  | -1.61788600 |
| C | 3.08618500  | -0.58527600 | -2.84993700 |
| H | 5.19993300  | -2.13316700 | -2.09361200 |
| H | 7.34963200  | -1.31723600 | -1.17086200 |
| C | 2.08215200  | 0.29732400  | -3.14278300 |
| C | 2.32330500  | 1.74709800  | -2.99728500 |
| H | 2.90494400  | -1.65260400 | -2.93043200 |
| C | 8.15139700  | 1.26137600  | -0.79383100 |
| H | 8.02739800  | 2.25475400  | -0.34505400 |
| H | 8.48487200  | 0.59196700  | 0.01014200  |
| O | 1.48304900  | 2.62140300  | -3.19459700 |
| C | 0.71503500  | -0.09302700 | -3.54128700 |
| H | 0.02030700  | 0.08741800  | -2.61219700 |
| C | 9.23726700  | 1.32268800  | -1.88401300 |
| H | 10.19057700 | 1.66828800  | -1.46883400 |
| H | 9.39603900  | 0.33512600  | -2.33119200 |
| H | 8.94256000  | 2.00816800  | -2.68631000 |
| N | 3.61408300  | 2.09445600  | -2.60013100 |
| H | 3.74504700  | 3.08945200  | -2.46107000 |
| C | 0.46878200  | -1.52911000 | -3.97557900 |
| H | 0.75578500  | -2.24439100 | -3.19896400 |
| H | -0.59477300 | -1.68267100 | -4.17367800 |
| H | 1.03083400  | -1.76831500 | -4.88772800 |
| H | 0.29173100  | 0.64392400  | -4.23205100 |

**<sup>3</sup>TS5-S**

|   |             |             |             |
|---|-------------|-------------|-------------|
| N | 0.24496600  | 1.62866800  | -0.01792800 |
| N | -2.52629800 | 1.15109800  | 0.17943900  |
| N | -2.04774600 | -1.62582200 | 0.00053300  |
| N | 0.71857400  | -1.12363500 | -0.20667800 |
| C | 1.57842200  | 1.66482400  | 0.27875400  |
| C | 2.03908300  | 3.02411700  | 0.24318500  |
| C | 0.97228000  | 3.79854300  | -0.11926500 |
| C | -0.16693700 | 2.92268700  | -0.22914900 |
| C | -1.50169200 | 3.32965900  | -0.34176600 |
| C | -2.59065400 | 2.49769900  | -0.06478100 |
| C | -3.93857400 | 2.95749300  | 0.17327200  |
| C | -4.65699000 | 1.88297600  | 0.59979600  |

|    |             |             |             |
|----|-------------|-------------|-------------|
| C  | -3.77642300 | 0.73779800  | 0.55441300  |
| C  | -4.17265800 | -0.59718900 | 0.70932600  |
| C  | -3.36456900 | -1.68733600 | 0.36623400  |
| C  | -3.84075200 | -3.04101000 | 0.18564800  |
| C  | -2.81340100 | -3.76048500 | -0.34142200 |
| C  | -1.67677900 | -2.87316200 | -0.42933100 |
| C  | -0.37444100 | -3.26249200 | -0.75193000 |
| C  | 0.74711700  | -2.45369100 | -0.53878400 |
| C  | 2.09763400  | -2.94371100 | -0.40733700 |
| C  | 2.85213000  | -1.92002500 | 0.08223800  |
| C  | 1.98905800  | -0.77060000 | 0.16954100  |
| C  | 2.39987900  | 0.53728400  | 0.47140700  |
| H  | 3.05991000  | 3.32421600  | 0.43169100  |
| H  | 0.94822700  | 4.87042300  | -0.25241000 |
| H  | -4.27139500 | 3.98078000  | 0.07225900  |
| H  | -5.69623400 | 1.85873900  | 0.89242300  |
| H  | -4.84533900 | -3.37721700 | 0.39838100  |
| H  | -2.80807400 | -4.80407600 | -0.62123000 |
| H  | 2.40394900  | -3.96124800 | -0.60111300 |
| H  | 3.88907900  | -1.92557600 | 0.37880800  |
| Mn | -0.89770000 | 0.00829000  | -0.06775900 |
| Cl | -0.67985400 | -0.12923400 | 2.30585100  |
| O  | -1.17312800 | 0.07212800  | -1.75801600 |
| C  | -5.56648300 | -0.88800600 | 1.14686200  |
| C  | -6.67429500 | -0.60644900 | 0.34118900  |
| C  | -5.81046400 | -1.49266100 | 2.38509900  |
| C  | -7.97428700 | -0.89274500 | 0.75085900  |
| C  | -7.10188900 | -1.79495600 | 2.81258000  |
| C  | -8.18639400 | -1.49110800 | 1.99169600  |
| C  | -1.78602800 | 4.75215400  | -0.68096900 |
| C  | -2.27555800 | 5.08676900  | -1.94734700 |
| C  | -1.59601300 | 5.79309700  | 0.23158800  |
| C  | -2.56297500 | 6.40349000  | -2.29973000 |
| C  | -1.87173300 | 7.11820600  | -0.09919500 |
| C  | -2.35946700 | 7.42145800  | -1.36938800 |
| C  | -0.13776300 | -4.66369900 | -1.20071200 |
| C  | 0.12758700  | -4.94664500 | -2.54411300 |
| C  | -0.14779200 | -5.73192600 | -0.29958900 |
| C  | 0.38263200  | -6.24774000 | -2.97561600 |
| C  | 0.10030000  | -7.03932100 | -0.71084500 |
| C  | 0.36904900  | -7.29373900 | -2.05496200 |
| F  | -6.50058500 | -0.04382500 | -0.86296100 |
| F  | -9.01514000 | -0.60845600 | -0.03980900 |
| F  | -9.42792900 | -1.77361000 | 2.39273200  |

|   |             |             |             |
|---|-------------|-------------|-------------|
| F | -7.30753000 | -2.36984400 | 4.00181600  |
| F | -4.78881300 | -1.79938500 | 3.19029300  |
| F | -1.13061200 | 5.52828700  | 1.45916100  |
| F | -1.67805700 | 8.09660700  | 0.79163700  |
| F | -2.62849300 | 8.68745600  | -1.69571900 |
| F | -3.02668200 | 6.69698400  | -3.51876100 |
| F | -2.47597600 | 4.12693400  | -2.86038400 |
| F | -0.40166800 | -5.50754100 | 0.99556400  |
| F | 0.12846200  | -3.96564100 | -3.44675100 |
| F | 0.63159700  | -6.50031400 | -4.26531200 |
| F | 0.60925900  | -8.54322600 | -2.46119100 |
| F | 0.08682100  | -8.04651400 | 0.16950300  |
| C | 3.70102000  | 0.74135100  | 0.99201600  |
| C | 4.72551200  | 0.88192600  | 1.62417200  |
| C | 5.85470300  | 0.98054800  | 2.52745000  |
| H | 6.70118700  | 1.45739700  | 2.01501900  |
| C | 6.29921000  | -0.35505200 | 3.20007300  |
| H | 6.53991200  | -1.17346700 | 2.51814700  |
| C | 5.57666100  | 1.69065400  | 3.89421400  |
| H | 5.20026200  | 2.71456200  | 3.82006200  |
| C | 6.97718500  | 1.56550400  | 4.54339900  |
| H | 6.92877000  | 1.65047500  | 5.63382700  |
| H | 7.64090900  | 2.35930200  | 4.18385300  |
| C | 7.47269500  | 0.15524800  | 4.06764500  |
| H | 7.68594600  | -0.52111900 | 4.90143500  |
| H | 8.38805300  | 0.23816500  | 3.47119800  |
| C | 5.11972500  | -0.67736100 | 4.14525500  |
| H | 5.44672100  | -1.34609700 | 4.94852000  |
| C | 4.62924000  | 0.71458800  | 4.64009000  |
| H | 4.75631200  | 0.83906800  | 5.71908300  |
| N | 2.81653700  | -0.54863100 | 3.73931500  |
| H | 1.92115700  | -0.74214400 | 3.29800100  |
| C | 6.77395800  | 0.93218200  | -1.22439800 |
| C | 5.98019300  | -0.10250400 | -1.71013800 |
| C | 4.70642200  | 0.16122200  | -2.23392700 |
| C | 4.20867600  | 1.48750400  | -2.28179400 |
| C | 5.03777800  | 2.52685400  | -1.81212300 |
| C | 6.29107500  | 2.25771700  | -1.29233400 |
| H | 6.33474500  | -1.12991700 | -1.66054800 |
| C | 2.86705600  | 1.69540900  | -2.73652000 |
| H | 4.66167300  | 3.54628200  | -1.84294600 |
| H | 6.91049700  | 3.06853500  | -0.91785400 |
| C | 2.04676300  | 0.66686800  | -3.11602000 |
| C | 2.56192000  | -0.71806600 | -3.09537300 |

|   |             |             |             |
|---|-------------|-------------|-------------|
| H | 2.48865900  | 2.71306200  | -2.73502100 |
| C | 8.15019400  | 0.64686700  | -0.66630000 |
| H | 8.16542100  | -0.35250800 | -0.21387900 |
| H | 8.37347800  | 1.35868500  | 0.13903800  |
| O | 1.90819500  | -1.71194700 | -3.39765600 |
| C | 0.62979900  | 0.82022500  | -3.49616000 |
| H | -0.02002100 | 0.40696500  | -2.59861200 |
| C | 9.24601900  | 0.74045300  | -1.74402800 |
| H | 10.23425400 | 0.53653600  | -1.31694500 |
| H | 9.26576300  | 1.73957200  | -2.19348600 |
| H | 9.06283800  | 0.01768800  | -2.54682600 |
| N | 3.88884000  | -0.85057800 | -2.68846500 |
| H | 4.19845100  | -1.81252500 | -2.61397200 |
| C | 0.09965600  | 2.21552300  | -3.78356100 |
| H | 0.26237900  | 2.89334700  | -2.93980400 |
| H | -0.97794600 | 2.17830200  | -3.96088300 |
| H | 0.58382600  | 2.64726800  | -4.66929300 |
| H | 0.35398100  | 0.08624400  | -4.26069900 |
| C | 3.90365900  | -1.32475100 | 3.47266000  |
| O | 3.92604500  | -2.37014300 | 2.83488000  |
| C | 3.11073300  | 0.76757400  | 4.29057300  |
| H | 2.50043300  | 0.95768900  | 5.18035300  |
| H | 2.88727400  | 1.55289200  | 3.55843800  |

**<sup>5</sup>TS5-R**

|   |             |             |             |
|---|-------------|-------------|-------------|
| N | 0.60922800  | -1.29716900 | -0.21614800 |
| N | -2.21294300 | -1.53779200 | -0.03261000 |
| N | -2.42950000 | 1.26922700  | 0.16010100  |
| N | 0.37946000  | 1.51300400  | -0.00456000 |
| C | 1.91413200  | -1.04120300 | 0.10411700  |
| C | 2.69037900  | -2.24730800 | -0.00701100 |
| C | 1.83806800  | -3.22331400 | -0.43347900 |
| C | 0.52582100  | -2.62920900 | -0.51697800 |
| C | -0.66826800 | -3.35172000 | -0.67881300 |
| C | -1.93416200 | -2.83834600 | -0.39608500 |
| C | -3.14376200 | -3.62230900 | -0.30796200 |
| C | -4.12057000 | -2.80304100 | 0.16046000  |
| C | -3.54314000 | -1.48537100 | 0.29526100  |
| C | -4.25963100 | -0.32066800 | 0.58992900  |
| C | -3.73377300 | 0.96832300  | 0.44808200  |
| C | -4.52019200 | 2.17980700  | 0.43033100  |
| C | -3.68532600 | 3.19219600  | 0.07284800  |
| C | -2.36660800 | 2.62457800  | -0.07482300 |
| C | -1.20476200 | 3.36513900  | -0.29382600 |

|    |             |             |             |
|----|-------------|-------------|-------------|
| C  | 0.08896600  | 2.83967000  | -0.16951000 |
| C  | 1.29464400  | 3.61615800  | -0.01520700 |
| C  | 2.28782700  | 2.74265100  | 0.31764400  |
| C  | 1.71039100  | 1.42581300  | 0.28324500  |
| C  | 2.43669600  | 0.22734100  | 0.41601800  |
| H  | 3.73719700  | -2.32617700 | 0.23876000  |
| H  | 2.06043500  | -4.26717600 | -0.60021100 |
| H  | -3.22415500 | -4.67227200 | -0.54728600 |
| H  | -5.14852900 | -3.05732600 | 0.37118900  |
| H  | -5.58066800 | 2.23328700  | 0.62976800  |
| H  | -3.92517800 | 4.23877600  | -0.04829500 |
| H  | 1.36288300  | 4.68798800  | -0.12281200 |
| H  | 3.32913200  | 2.94562000  | 0.52266900  |
| Mn | -0.93233400 | -0.01534000 | -0.05263400 |
| Cl | -0.64572500 | -0.18415900 | 2.31510500  |
| O  | -1.13357300 | 0.10759900  | -1.77453200 |
| C  | -5.69569700 | -0.43555200 | 0.96857100  |
| C  | -6.67330500 | -0.85699100 | 0.06188900  |
| C  | -6.12103200 | -0.08610500 | 2.25502000  |
| C  | -8.01672200 | -0.94829200 | 0.41794500  |
| C  | -7.46041300 | -0.16264200 | 2.63143200  |
| C  | -8.40981500 | -0.59747100 | 1.70835300  |
| C  | -0.54348900 | -4.79534800 | -1.02901800 |
| C  | -0.11290800 | -5.19657400 | -2.29704600 |
| C  | -0.80430400 | -5.80330100 | -0.09408600 |
| C  | 0.04409100  | -6.53909100 | -2.63263900 |
| C  | -0.66167000 | -7.15296600 | -0.40849400 |
| C  | -0.23373300 | -7.52040400 | -1.68305600 |
| C  | -1.35632000 | 4.81559600  | -0.59849800 |
| C  | -1.82725800 | 5.22400600  | -1.85070700 |
| C  | -1.05301600 | 5.81184600  | 0.33294700  |
| C  | -1.98277700 | 6.57125200  | -2.17019300 |
| C  | -1.19449000 | 7.16470500  | 0.03318800  |
| C  | -1.66297400 | 7.54308100  | -1.22375200 |
| F  | -6.32647400 | -1.18954200 | -1.18915500 |
| F  | -8.92936900 | -1.35863400 | -0.46949600 |
| F  | -9.69522700 | -0.67706000 | 2.05919900  |
| F  | -7.83967100 | 0.17473700  | 3.86810100  |
| F  | -5.23231200 | 0.34006800  | 3.15817000  |
| F  | -1.20471700 | -5.48165300 | 1.14120600  |
| F  | -0.92242600 | -8.09450700 | 0.50367200  |
| F  | -0.09043800 | -8.81033100 | -1.99398700 |
| F  | 0.45468100  | -6.89043700 | -3.85595400 |
| F  | 0.16553300  | -4.27819900 | -3.23390200 |

|   |             |             |             |
|---|-------------|-------------|-------------|
| F | -0.60523200 | 5.47516100  | 1.55067300  |
| F | -2.14762700 | 4.31153600  | -2.77263400 |
| F | -2.43421400 | 6.93758900  | -3.37401400 |
| F | -1.80607300 | 8.83705600  | -1.52040500 |
| F | -0.89218100 | 8.09876500  | 0.94225500  |
| C | 3.75983400  | 0.30619500  | 0.90956300  |
| C | 4.79969500  | 0.33821300  | 1.53258000  |
| C | 5.93820100  | 0.31616400  | 2.42759700  |
| H | 6.82842500  | 0.69565400  | 1.90769300  |
| C | 5.74585500  | 1.05904400  | 3.79231500  |
| H | 5.48403500  | 2.11781500  | 3.71449500  |
| C | 6.23528000  | -1.05765000 | 3.10485200  |
| H | 6.38146100  | -1.90003500 | 2.42554700  |
| C | 7.46126100  | -0.67581900 | 3.96630400  |
| H | 7.60033800  | -1.36722600 | 4.80337700  |
| H | 8.37877300  | -0.69847700 | 3.36776300  |
| C | 7.12740700  | 0.78330700  | 4.43537000  |
| H | 7.09441000  | 0.87954600  | 5.52540000  |
| H | 7.87285400  | 1.49669100  | 4.06747600  |
| C | 4.70048200  | 0.19616000  | 4.54706300  |
| H | 4.84748100  | 0.30990700  | 5.62468300  |
| C | 5.03115200  | -1.24330200 | 4.05544100  |
| H | 5.28557100  | -1.94110500 | 4.86023800  |
| N | 2.75370000  | -0.86226700 | 3.66219800  |
| H | 1.83453900  | -0.96025000 | 3.23714700  |
| C | 6.89632600  | 0.83888200  | -1.29109600 |
| C | 5.94153600  | 1.78412400  | -1.65541500 |
| C | 4.70098200  | 1.38204000  | -2.17171800 |
| C | 4.40594900  | 0.00582900  | -2.34448000 |
| C | 5.39129500  | -0.93795500 | -1.98355000 |
| C | 6.60680200  | -0.53310200 | -1.46461100 |
| H | 6.14689400  | 2.84446700  | -1.52281500 |
| C | 3.10939700  | -0.35802100 | -2.82120200 |
| H | 5.16550000  | -1.99437900 | -2.10018100 |
| H | 7.34870400  | -1.27300900 | -1.17614500 |
| C | 2.13503300  | 0.56540100  | -3.11191700 |
| C | 2.42459400  | 2.00325000  | -2.92183600 |
| H | 2.89064100  | -1.41662500 | -2.92372700 |
| C | 8.24348800  | 1.26721700  | -0.75387800 |
| H | 8.16182600  | 2.25948400  | -0.29309200 |
| H | 8.55608000  | 0.57577000  | 0.03985200  |
| O | 1.61913600  | 2.91222500  | -3.10192300 |
| C | 0.77723400  | 0.22474800  | -3.55438000 |
| H | 0.05306000  | 0.29451900  | -2.60932400 |

|   |             |             |             |
|---|-------------|-------------|-------------|
| H | 0.35846500  | 1.02770400  | -4.16923800 |
| C | 0.52857400  | -1.16653300 | -4.11593800 |
| H | 1.12541900  | -1.34741500 | -5.01973300 |
| H | 0.76560300  | -1.94740800 | -3.38830100 |
| H | -0.52889500 | -1.27750900 | -4.37049900 |
| C | 9.32349900  | 1.29859000  | -1.85128900 |
| H | 9.05061500  | 2.00460700  | -2.64337900 |
| H | 10.29234300 | 1.60145000  | -1.43880000 |
| H | 9.44022600  | 0.31088600  | -2.31085500 |
| N | 3.72299900  | 2.29576300  | -2.50341500 |
| H | 3.88932900  | 3.28312300  | -2.34763800 |
| C | 3.74618300  | -1.75458900 | 3.39197700  |
| C | 3.19472700  | 0.41468900  | 4.20668700  |
| H | 2.61478200  | 0.67422600  | 5.09917000  |
| H | 3.05383400  | 1.21820300  | 3.47330400  |
| O | 3.64934600  | -2.79811400 | 2.75809700  |

**<sup>5</sup>TS5-S**

|   |             |             |             |
|---|-------------|-------------|-------------|
| N | 0.24287400  | 1.63432100  | 0.00609200  |
| N | -2.54440000 | 1.16042700  | 0.18208800  |
| N | -2.08833100 | -1.60979500 | 0.00109900  |
| N | 0.69719300  | -1.14317100 | -0.18880100 |
| C | 1.57922400  | 1.65848400  | 0.27419800  |
| C | 2.05265400  | 3.01509700  | 0.26133100  |
| C | 0.98342800  | 3.80316000  | -0.06178500 |
| C | -0.15828200 | 2.93008000  | -0.17655400 |
| C | -1.49389400 | 3.34494700  | -0.28695300 |
| C | -2.58946300 | 2.51822700  | -0.04157100 |
| C | -3.93936900 | 2.98731600  | 0.16189800  |
| C | -4.68236900 | 1.91537600  | 0.54671900  |
| C | -3.81323200 | 0.76156500  | 0.51081000  |
| C | -4.22750000 | -0.56894900 | 0.64430800  |
| C | -3.41837200 | -1.66398800 | 0.32268900  |
| C | -3.89987000 | -3.01428100 | 0.13722400  |
| C | -2.86150400 | -3.74751700 | -0.34381200 |
| C | -1.71310700 | -2.87416900 | -0.39994900 |
| C | -0.41255300 | -3.28092900 | -0.69003300 |
| C | 0.71928800  | -2.47376600 | -0.49483400 |
| C | 2.06853500  | -2.97192000 | -0.38066500 |
| C | 2.83809000  | -1.93902500 | 0.06461200  |
| C | 1.97558700  | -0.78803200 | 0.14897200  |
| C | 2.39769400  | 0.52077900  | 0.43573600  |
| H | 3.07837300  | 3.30497800  | 0.43889500  |
| H | 0.96126600  | 4.87775200  | -0.17139100 |

|    |             |             |             |
|----|-------------|-------------|-------------|
| H  | -4.25842100 | 4.01535200  | 0.06575500  |
| H  | -5.73019800 | 1.89820600  | 0.80711600  |
| H  | -4.91443100 | -3.33957000 | 0.31650400  |
| H  | -2.85915600 | -4.79263100 | -0.61686100 |
| H  | 2.36671500  | -3.99504800 | -0.55616300 |
| H  | 3.88207300  | -1.94099100 | 0.33503100  |
| Mn | -0.94024400 | 0.00366000  | -0.02930500 |
| Cl | -0.63466900 | -0.11943800 | 2.33779300  |
| O  | -1.14790700 | 0.09597300  | -1.75491200 |
| C  | -5.63731100 | -0.84824900 | 1.03499100  |
| C  | -6.71571700 | -0.54515500 | 0.19778700  |
| C  | -5.92723500 | -1.46234900 | 2.25858000  |
| C  | -8.03121000 | -0.81997100 | 0.56358200  |
| C  | -7.23479700 | -1.75333900 | 2.64225700  |
| C  | -8.28927600 | -1.42814400 | 1.79087200  |
| C  | -1.76386000 | 4.77541600  | -0.60613600 |
| C  | -2.21604400 | 5.13760200  | -1.87857600 |
| C  | -1.58971600 | 5.79615500  | 0.33166500  |
| C  | -2.48440100 | 6.46332400  | -2.21203100 |
| C  | -1.84764100 | 7.12950500  | 0.02023500  |
| C  | -2.29895000 | 7.46111300  | -1.25635800 |
| C  | -0.18046600 | -4.69522900 | -1.09806700 |
| C  | 0.18328600  | -5.00841000 | -2.41175900 |
| C  | -0.28452400 | -5.74777400 | -0.18386000 |
| C  | 0.43924900  | -6.32218000 | -2.80190300 |
| C  | -0.03801800 | -7.06740900 | -0.55467200 |
| C  | 0.32809000  | -7.35173000 | -1.86940900 |
| F  | -6.49734400 | 0.02798900  | -0.99380200 |
| F  | -9.04314700 | -0.51506800 | -0.25616300 |
| F  | -9.54592700 | -1.69966200 | 2.14978400  |
| F  | -7.48441900 | -2.33760500 | 3.81832900  |
| F  | -4.93468100 | -1.78975800 | 3.09178600  |
| F  | -1.15732000 | 5.50278100  | 1.56464600  |
| F  | -1.67061900 | 8.08883800  | 0.93492100  |
| F  | -2.55042700 | 8.73525300  | -1.56454400 |
| F  | -2.91296400 | 6.78450200  | -3.43688800 |
| F  | -2.39769400 | 4.19734900  | -2.81503800 |
| F  | -0.63077000 | -5.49703900 | 1.08486300  |
| F  | 0.28288300  | -4.04289100 | -3.32538600 |
| F  | 0.78255700  | -6.60212600 | -4.06390700 |
| F  | 0.56837200  | -8.61319500 | -2.23612700 |
| F  | -0.14377800 | -8.05810500 | 0.33788600  |
| C  | 3.70851000  | 0.71626600  | 0.92939500  |
| C  | 4.74298500  | 0.85384000  | 1.54678500  |



|   |             |             |             |
|---|-------------|-------------|-------------|
| C | 5.88861800  | 0.95034900  | 2.42763700  |
| H | 6.72883200  | 1.41320200  | 1.89243200  |
| C | 6.33142500  | -0.38197600 | 3.10766000  |
| H | 6.55137900  | -1.21045300 | 2.43096000  |
| C | 5.64216500  | 1.67954900  | 3.79075000  |
| H | 5.27518500  | 2.70640500  | 3.71079500  |
| C | 7.05284600  | 1.54701900  | 4.41590200  |
| H | 7.02467400  | 1.64489900  | 5.50593200  |
| H | 7.71798500  | 2.32980200  | 4.03544600  |
| C | 7.52545000  | 0.12638100  | 3.94782000  |
| H | 7.74701200  | -0.54249600 | 4.78543200  |
| H | 8.43057000  | 0.19310700  | 3.33393700  |
| C | 5.16523100  | -0.68060000 | 4.07679700  |
| H | 5.49888400  | -1.34384900 | 4.88182000  |
| C | 4.69798200  | 0.72199200  | 4.56408500  |
| H | 4.84531100  | 0.85755000  | 5.63913700  |
| C | 3.93068200  | -1.32234500 | 3.43214400  |
| N | 2.85691900  | -0.53100800 | 3.70676500  |
| H | 1.95000800  | -0.72087200 | 3.28716200  |
| C | 6.84730500  | 0.86874900  | -1.26993800 |
| C | 6.03819100  | -0.15504100 | -1.75453500 |
| C | 4.75628700  | 0.12241700  | -2.25032300 |
| C | 4.26369100  | 1.45262700  | -2.26834900 |
| C | 5.10664500  | 2.48043200  | -1.79530300 |
| C | 6.36890800  | 2.19740900  | -1.30589300 |
| H | 6.38952000  | -1.18445100 | -1.72957600 |
| C | 2.91977100  | 1.67533300  | -2.70212700 |
| H | 4.73493900  | 3.50187500  | -1.80294300 |
| H | 6.99999000  | 2.99943300  | -0.93188100 |
| C | 2.08754500  | 0.65889800  | -3.10158300 |
| C | 2.59681700  | -0.73052600 | -3.10490400 |
| H | 2.54585700  | 2.69428300  | -2.67664900 |
| C | 8.23469000  | 0.56955100  | -0.74793800 |
| H | 8.25967500  | -0.44145700 | -0.32271800 |
| H | 8.47478900  | 1.25999900  | 0.07115600  |
| O | 1.93803700  | -1.71633100 | -3.41837300 |
| C | 0.67878200  | 0.83115800  | -3.47900300 |
| H | 0.00901300  | 0.41507400  | -2.57962900 |
| H | 0.39301100  | 0.10636900  | -4.24860500 |
| C | 0.15975200  | 2.23518400  | -3.74575000 |
| H | 0.65285700  | 2.68648600  | -4.61711300 |
| H | 0.31509700  | 2.89493000  | -2.88587800 |
| H | -0.91650600 | 2.20561100  | -3.93269100 |
| C | 9.30794800  | 0.69254200  | -1.84537400 |

|   |             |             |             |
|---|-------------|-------------|-------------|
| H | 9.10833700  | -0.00894600 | -2.66295700 |
| H | 10.30478800 | 0.47824200  | -1.44420500 |
| H | 9.31812500  | 1.70320000  | -2.26853500 |
| N | 3.92623900  | -0.87694400 | -2.70870000 |
| H | 4.23153100  | -1.84184700 | -2.65644800 |
| C | 3.17421500  | 0.78705800  | 4.24012400  |
| H | 2.58127000  | 0.99232900  | 5.13818900  |
| H | 2.94581100  | 1.56796000  | 3.50456300  |
| O | 3.93212600  | -2.37527100 | 2.80645400  |

**<sup>3</sup>TS7-R**

|    |             |             |             |
|----|-------------|-------------|-------------|
| N  | 0.87482500  | 2.11821400  | 0.23471000  |
| N  | -1.15930300 | 0.15673300  | 0.09311300  |
| N  | 0.79270400  | -1.85061200 | -0.12551900 |
| N  | 2.83572400  | 0.07524900  | 0.08350100  |
| C  | 1.95518900  | 2.88321700  | 0.59033700  |
| C  | 1.55017600  | 4.26991700  | 0.65317400  |
| C  | 0.24595300  | 4.32542200  | 0.27022000  |
| C  | -0.18449300 | 2.96711700  | 0.04089300  |
| C  | -1.50819300 | 2.57933300  | -0.17127900 |
| C  | -1.95909900 | 1.26166200  | -0.04530800 |
| C  | -3.33964200 | 0.88109000  | 0.14284500  |
| C  | -3.34800200 | -0.44439700 | 0.45201200  |
| C  | -1.98195600 | -0.89825400 | 0.38534200  |
| C  | -1.56762200 | -2.23402300 | 0.48912300  |
| C  | -0.26944600 | -2.66670200 | 0.15694100  |
| C  | 0.11273900  | -4.03390200 | -0.04986300 |
| C  | 1.40493400  | -4.02600300 | -0.49788900 |
| C  | 1.84233000  | -2.65523500 | -0.50274200 |
| C  | 3.16035100  | -2.22865100 | -0.70768300 |
| C  | 3.62305600  | -0.95514000 | -0.36425800 |
| C  | 5.00786200  | -0.55027400 | -0.31226400 |
| C  | 5.03563700  | 0.70617800  | 0.20926300  |
| C  | 3.66395200  | 1.11093200  | 0.41712100  |
| H  | 2.19077300  | 5.09288300  | 0.93344200  |
| H  | -0.38971400 | 5.19596100  | 0.19193400  |
| H  | -4.18230700 | 1.55420500  | 0.08189700  |
| H  | -4.18825100 | -1.06953600 | 0.70610200  |
| H  | -0.54260000 | -4.87915500 | 0.10552900  |
| H  | 2.02437300  | -4.87432300 | -0.75229800 |
| H  | 5.84833500  | -1.15999200 | -0.60984500 |
| H  | 5.90003500  | 1.32680900  | 0.39620600  |
| Mn | 0.83240300  | 0.12157400  | 0.01879700  |
| Cl | 0.80349500  | -0.08200500 | 2.38936500  |

|   |             |             |             |
|---|-------------|-------------|-------------|
| O | 0.88550200  | 0.37054800  | -1.68614200 |
| C | -2.54465800 | 3.62141200  | -0.42505900 |
| C | -2.96713500 | 3.89687200  | -1.72428100 |
| C | -3.19834100 | 4.28860500  | 0.61356700  |
| C | -4.02277200 | 4.75578900  | -2.00340200 |
| C | -4.24610800 | 5.17311200  | 0.36450400  |
| C | -4.66127800 | 5.40156600  | -0.94716500 |
| C | 4.12106100  | -3.22611600 | -1.25320600 |
| C | 4.01374900  | -3.65346400 | -2.58077500 |
| C | 5.13816500  | -3.79233400 | -0.47903600 |
| C | 4.87862100  | -4.59941400 | -3.12422000 |
| C | 6.02079400  | -4.73548500 | -1.00179600 |
| C | 5.88735800  | -5.14096000 | -2.32874000 |
| F | -2.83109400 | 4.06783100  | 1.88098600  |
| F | -4.85897000 | 5.79976200  | 1.37342900  |
| F | -5.66896100 | 6.24083600  | -1.18896800 |
| F | -4.41371300 | 4.96586600  | -3.25977400 |
| F | -2.36400000 | 3.27843300  | -2.76807100 |
| F | 5.28421700  | -3.42893600 | 0.80102300  |
| F | 3.05481600  | -3.14645100 | -3.37361700 |
| F | 4.75216300  | -4.98610500 | -4.39765500 |
| F | 6.72474500  | -6.04644600 | -2.83781300 |
| F | 6.98509800  | -5.25968900 | -0.23911400 |
| C | -3.18970300 | -3.93277800 | 1.63912700  |
| C | -3.94480400 | -4.71356900 | 2.60173300  |
| H | -4.48340100 | -5.52431000 | 2.09281600  |
| C | -4.91311800 | -3.90324500 | 3.52004000  |
| H | -5.65217700 | -3.28560800 | 3.00555000  |
| C | -3.12378200 | -5.28493100 | 3.80727900  |
| H | -2.28134100 | -5.92689400 | 3.53556600  |
| C | -4.25956100 | -6.00479300 | 4.57591600  |
| H | -4.00338300 | -6.15711300 | 5.62935800  |
| H | -4.45402200 | -6.99137200 | 4.14163700  |
| C | -5.48910700 | -5.04966300 | 4.38386800  |
| H | -5.88823000 | -4.67947700 | 5.33348500  |
| H | -6.30693200 | -5.55760900 | 3.86124900  |
| C | -3.94986100 | -3.08590500 | 4.40842400  |
| H | -4.45119000 | -2.78255400 | 5.33367700  |
| C | -2.73205600 | -4.02944800 | 4.63005300  |
| H | -2.61105800 | -4.30934300 | 5.68021900  |
| C | -3.37444600 | -1.81942600 | 3.76345500  |
| N | -2.01659300 | -1.90221600 | 3.82511600  |
| H | -1.42999200 | -1.19691800 | 3.38612400  |
| C | -6.06440000 | -0.19143500 | -2.18849800 |

|   |             |             |             |
|---|-------------|-------------|-------------|
| C | -5.42098600 | -1.38843700 | -2.27150300 |
| C | -4.03536200 | -1.49823100 | -2.64039100 |
| C | -5.33673000 | 1.05005400  | -2.51252900 |
| H | -5.94292400 | -2.30622500 | -2.01303100 |
| C | -1.94615700 | -2.72166400 | -2.83528800 |
| H | -3.54352300 | 1.73489600  | -3.17572800 |
| C | -1.25607900 | -1.53170100 | -3.16583900 |
| C | -1.97204000 | -0.33447200 | -3.25564500 |
| H | -1.38767400 | -3.64850400 | -2.74637000 |
| C | -7.48862100 | 0.00270600  | -1.73766100 |
| H | -8.02743300 | 0.53674000  | -2.53267600 |
| H | -7.47812300 | 0.71058000  | -0.89783000 |
| C | 0.21980900  | -1.52150500 | -3.30600900 |
| H | 0.66971300  | -2.48727000 | -3.06457800 |
| H | 0.58981000  | -0.77236100 | -2.43602000 |
| C | 0.82695100  | -0.90663100 | -4.56035700 |
| H | 1.91828600  | -0.90332300 | -4.48452200 |
| H | 0.48916200  | 0.12326000  | -4.71114800 |
| H | 0.54385800  | -1.49089200 | -5.44589000 |
| C | -8.24018200 | -1.27012500 | -1.34779000 |
| H | -9.26021700 | -1.02689700 | -1.03370900 |
| H | -7.74932500 | -1.78650200 | -0.51408800 |
| H | -8.30870600 | -1.97258700 | -2.18707600 |
| C | -2.49126200 | -3.19500200 | 0.97569300  |
| C | 3.26503700  | 2.41559500  | 0.73811700  |
| C | 4.32859300  | 3.37371100  | 1.14956900  |
| C | 4.98081600  | 3.22618400  | 2.37893300  |
| C | 4.74192000  | 4.42621700  | 0.32668800  |
| C | 5.99353900  | 4.09450700  | 2.78155500  |
| C | 5.74655800  | 5.31075600  | 0.71131600  |
| C | 6.37479700  | 5.14123200  | 1.94397700  |
| F | 4.16611400  | 4.60549300  | -0.87055900 |
| F | 6.11863100  | 6.31032100  | -0.09577500 |
| F | 7.34196200  | 5.98027800  | 2.32085900  |
| F | 6.59836800  | 3.93264900  | 3.96251200  |
| F | 4.63910200  | 2.22784400  | 3.19936900  |
| C | -3.34165000 | -0.31203700 | -2.98723500 |
| C | -3.30929500 | -2.70455200 | -2.59507900 |
| H | -3.82791200 | -3.61869900 | -2.31841800 |
| H | -1.44832000 | 0.59927300  | -3.43720600 |
| N | -4.04401900 | 0.87529300  | -2.98195000 |
| O | -5.80581700 | 2.18298400  | -2.38068200 |
| C | -1.48610600 | -3.21351400 | 4.16942000  |
| H | -0.74148400 | -3.13102800 | 4.96886900  |

|   |             |             |            |
|---|-------------|-------------|------------|
| H | -0.99429300 | -3.67329500 | 3.30298400 |
| O | -4.03772400 | -0.89734000 | 3.30608100 |

**<sup>3</sup>TS7-S**

|    |             |             |             |
|----|-------------|-------------|-------------|
| N  | -0.67918000 | 2.23053500  | 0.30653400  |
| N  | 1.27734000  | 0.19854500  | 0.16965400  |
| N  | -0.74686300 | -1.72312700 | -0.17190600 |
| N  | -2.72245800 | 0.28159600  | 0.02509400  |
| C  | -1.74508200 | 3.03221600  | 0.61009700  |
| C  | -1.30648700 | 4.40808200  | 0.65424400  |
| C  | 0.01592700  | 4.41859500  | 0.32909700  |
| C  | 0.41375500  | 3.04562600  | 0.14066800  |
| C  | 1.72929900  | 2.61152600  | -0.02258000 |
| C  | 2.12386800  | 1.27476300  | 0.08840600  |
| C  | 3.48213500  | 0.83053500  | 0.29127700  |
| C  | 3.42737500  | -0.50888200 | 0.54088000  |
| C  | 2.04624400  | -0.89900200 | 0.43512000  |
| C  | 1.57813500  | -2.22285800 | 0.48407200  |
| C  | 0.27440200  | -2.59320000 | 0.11491600  |
| C  | -0.16231600 | -3.94019900 | -0.12794200 |
| C  | -1.43580700 | -3.86586800 | -0.61170500 |
| C  | -1.81840300 | -2.47755000 | -0.59043100 |
| C  | -3.11558300 | -1.99903000 | -0.80301200 |
| C  | -3.53869200 | -0.71822300 | -0.43211700 |
| C  | -4.91382300 | -0.28270400 | -0.35086900 |
| C  | -4.90618300 | 0.95950400  | 0.20137400  |
| C  | -3.52240500 | 1.33390800  | 0.38932000  |
| H  | -1.94214000 | 5.25352600  | 0.87464800  |
| H  | 0.67927700  | 5.26902800  | 0.25771400  |
| H  | 4.35460000  | 1.46691700  | 0.25162600  |
| H  | 4.24211300  | -1.19179900 | 0.73091400  |
| H  | 0.43154500  | -4.81788400 | 0.07342000  |
| H  | -2.08860300 | -4.68340300 | -0.88120900 |
| H  | -5.77238400 | -0.86874700 | -0.64336000 |
| H  | -5.75697100 | 1.58336000  | 0.43166400  |
| Mn | -0.71840000 | 0.24049900  | 0.02935600  |
| Cl | -0.78960600 | -0.04023400 | 2.38904700  |
| O  | -0.69752700 | 0.54967200  | -1.66713600 |
| C  | 2.81050000  | 3.61916800  | -0.22449000 |
| C  | 3.23759000  | 3.95333100  | -1.50831800 |
| C  | 3.49632900  | 4.19723100  | 0.84613000  |
| C  | 4.32307200  | 4.78786700  | -1.74393200 |
| C  | 4.57601800  | 5.05418700  | 0.64216500  |
| C  | 4.99096800  | 5.34630800  | -0.65674600 |

|   |             |             |             |
|---|-------------|-------------|-------------|
| C | -4.10293900 | -2.95041100 | -1.38285100 |
| C | -3.99450300 | -3.34507800 | -2.72016000 |
| C | -5.14205500 | -3.50860500 | -0.63266800 |
| C | -4.87929100 | -4.25200600 | -3.29654400 |
| C | -6.04519000 | -4.41261800 | -1.18865400 |
| C | -5.90996400 | -4.78631800 | -2.52467500 |
| F | 3.13207000  | 3.91147200  | 2.10241600  |
| F | 5.21961100  | 5.59349600  | 1.68244600  |
| F | 6.02927100  | 6.15886400  | -0.85621100 |
| F | 4.71789400  | 5.05404100  | -2.98832300 |
| F | 2.61316700  | 3.41210800  | -2.58147300 |
| F | -5.29157900 | -3.17329300 | 0.65413500  |
| F | -3.01245600 | -2.84497500 | -3.48972000 |
| F | -4.75104200 | -4.60820300 | -4.57886900 |
| F | -6.76746600 | -5.65380300 | -3.06564700 |
| F | -7.03195400 | -4.92851700 | -0.44978800 |
| C | 3.09379000  | -4.02740000 | 1.61577500  |
| C | 3.71194800  | -4.92959500 | 2.56969000  |
| H | 4.57699500  | -5.43112700 | 2.11539200  |
| C | 4.11555500  | -4.29522700 | 3.94388400  |
| H | 4.80953900  | -3.45241800 | 3.88325100  |
| C | 2.75122200  | -5.97247400 | 3.22332200  |
| H | 2.20203400  | -6.61315600 | 2.53032100  |
| C | 3.74089800  | -6.70212100 | 4.16177200  |
| H | 3.22302400  | -7.20076300 | 4.98719600  |
| H | 4.30073200  | -7.46931100 | 3.61595900  |
| C | 4.68683200  | -5.54979700 | 4.64973000  |
| H | 4.68893000  | -5.43712700 | 5.73868500  |
| H | 5.72151500  | -5.72970000 | 4.33852700  |
| C | 2.76068400  | -3.96059500 | 4.62190100  |
| H | 2.88342200  | -3.99198000 | 5.70806800  |
| C | 1.83163700  | -5.09604700 | 4.10146200  |
| H | 1.37901300  | -5.69823000 | 4.89653500  |
| N | 0.79222600  | -3.05261700 | 3.63100000  |
| H | 0.17133900  | -2.38183000 | 3.18485400  |
| C | 6.18634100  | -0.22877700 | -2.08532400 |
| C | 5.51076400  | -1.40305700 | -2.22246800 |
| C | 4.12406100  | -1.45861100 | -2.59960300 |
| C | 5.49242600  | 1.04546600  | -2.34956100 |
| H | 6.00806400  | -2.34580900 | -2.00867600 |
| C | 2.00419000  | -2.61457900 | -2.86529300 |
| H | 3.72299500  | 1.80761100  | -2.99490300 |
| C | 1.35249600  | -1.39374700 | -3.15759800 |
| C | 2.10092200  | -0.21380300 | -3.18758500 |

|   |             |             |             |
|---|-------------|-------------|-------------|
| H | 1.41917400  | -3.52799100 | -2.81823300 |
| C | 7.61757200  | -0.09396400 | -1.63381800 |
| H | 8.16524100  | 0.46668500  | -2.40395100 |
| H | 7.63137500  | 0.57029900  | -0.75892100 |
| C | -0.12029900 | -1.33447400 | -3.32177000 |
| H | -0.60550000 | -2.28942700 | -3.10805700 |
| H | -0.47564900 | -0.58883900 | -2.44056600 |
| C | -0.68505800 | -0.67279100 | -4.57178300 |
| H | -1.77671000 | -0.63328800 | -4.51356200 |
| H | -0.30833700 | 0.34719900  | -4.69571300 |
| H | -0.40775800 | -1.24884600 | -5.46457700 |
| C | 8.33972400  | -1.40369700 | -1.31723000 |
| H | 9.36758200  | -1.20303300 | -0.99853200 |
| H | 7.84162900  | -1.95312800 | -0.50915800 |
| H | 8.38517700  | -2.06176900 | -2.19308700 |
| C | 2.45883500  | -3.22888500 | 0.95905800  |
| C | -3.07789900 | 2.61574800  | 0.72683400  |
| C | -4.08139100 | 3.64160600  | 1.12829700  |
| C | -4.10877100 | 4.13485400  | 2.43731400  |
| C | -5.00337100 | 4.17432500  | 0.22219200  |
| C | -5.02188300 | 5.10938300  | 2.83533900  |
| C | -5.93013500 | 5.14326300  | 0.59907800  |
| C | -5.93632900 | 5.61245200  | 1.91159200  |
| F | -5.01259000 | 3.75062800  | -1.04962800 |
| F | -6.80326800 | 5.63160800  | -0.28871400 |
| F | -6.81721800 | 6.54395900  | 2.28281600  |
| F | -5.02839000 | 5.56203700  | 4.09297700  |
| F | -3.23885300 | 3.67406100  | 3.34143500  |
| C | 3.46632500  | -0.24007300 | -2.90004100 |
| C | 3.36461500  | -2.64516500 | -2.61046400 |
| H | 3.85470500  | -3.58438900 | -2.36784300 |
| H | 1.60386800  | 0.74008900  | -3.33603300 |
| N | 4.19883300  | 0.92766100  | -2.83216500 |
| O | 5.99070100  | 2.15797800  | -2.15830500 |
| C | 0.69105100  | -4.38375800 | 3.36318900  |
| C | 2.05278200  | -2.63016400 | 4.22420700  |
| H | 1.87439600  | -1.99236000 | 5.09686600  |
| H | 2.64557900  | -2.05104800 | 3.50479500  |
| O | -0.16556500 | -4.93600500 | 2.68383000  |

**<sup>5</sup>TS7-R**

|   |             |             |             |
|---|-------------|-------------|-------------|
| N | 0.90307100  | 2.09932100  | 0.25509600  |
| N | -1.15755600 | 0.17028400  | 0.12002000  |
| N | 0.77777200  | -1.86369700 | -0.13485200 |

|    |             |             |             |
|----|-------------|-------------|-------------|
| N  | 2.84593900  | 0.05466300  | 0.12947000  |
| C  | 1.99343500  | 2.86571500  | 0.59171600  |
| C  | 1.59938300  | 4.25487800  | 0.63570000  |
| C  | 0.29220200  | 4.31774400  | 0.26456100  |
| C  | -0.15705100 | 2.96405500  | 0.06265200  |
| C  | -1.48414900 | 2.59373100  | -0.12562700 |
| C  | -1.95010700 | 1.27765100  | 0.00282700  |
| C  | -3.33370100 | 0.90946600  | 0.18500800  |
| C  | -3.35391500 | -0.42416100 | 0.45791100  |
| C  | -1.99000900 | -0.88689800 | 0.38027000  |
| C  | -1.59313500 | -2.22902400 | 0.43947300  |
| C  | -0.29449000 | -2.67203300 | 0.10689300  |
| C  | 0.07300900  | -4.04189500 | -0.11750700 |
| C  | 1.37556000  | -4.03918900 | -0.53332500 |
| C  | 1.82246000  | -2.66975500 | -0.50450600 |
| C  | 3.14974300  | -2.25175500 | -0.67572800 |
| C  | 3.62309900  | -0.98900400 | -0.31211000 |
| C  | 5.01338800  | -0.60134600 | -0.25394100 |
| C  | 5.05561000  | 0.65750500  | 0.25879200  |
| C  | 3.68733600  | 1.07945000  | 0.45592300  |
| H  | 2.24846800  | 5.07621000  | 0.90061800  |
| H  | -0.33473400 | 5.19393000  | 0.17984200  |
| H  | -4.16973600 | 1.59187100  | 0.13872700  |
| H  | -4.19967400 | -1.04902200 | 0.69341800  |
| H  | -0.59445100 | -4.88244100 | 0.00876300  |
| H  | 1.99338500  | -4.88888800 | -0.78702300 |
| H  | 5.84742600  | -1.22252900 | -0.54553700 |
| H  | 5.92657500  | 1.26924300  | 0.44438800  |
| Mn | 0.84591500  | 0.13331500  | 0.06676400  |
| Cl | 0.78885100  | -0.19299300 | 2.42039700  |
| O  | 0.92102900  | 0.34443000  | -1.67445700 |
| C  | -2.51004900 | 3.64913000  | -0.36749600 |
| C  | -2.91209300 | 3.96229400  | -1.66459900 |
| C  | -3.17195400 | 4.29445600  | 0.67970000  |
| C  | -3.95482600 | 4.83971400  | -1.93467600 |
| C  | -4.20782300 | 5.19543600  | 0.44013300  |
| C  | -4.60170300 | 5.46358600  | -0.87052700 |
| C  | 4.10522800  | -3.24951900 | -1.23046200 |
| C  | 3.99759900  | -3.65556100 | -2.56492500 |
| C  | 5.11384400  | -3.83707600 | -0.46149500 |
| C  | 4.85584900  | -4.60096600 | -3.11972100 |
| C  | 5.98921600  | -4.78054300 | -0.99571300 |
| C  | 5.85662600  | -5.16417300 | -2.32919000 |
| F  | -2.82476300 | 4.03599600  | 1.94561700  |



|   |             |             |             |
|---|-------------|-------------|-------------|
| F | -4.82874600 | 5.80086200  | 1.45701700  |
| F | -5.59813900 | 6.31853600  | -1.10364500 |
| F | -4.32778400 | 5.08529600  | -3.19009300 |
| F | -2.30488600 | 3.36116800  | -2.71586900 |
| F | 5.25880300  | -3.49471300 | 0.82458100  |
| F | 3.04566000  | -3.12812200 | -3.35195700 |
| F | 4.73031900  | -4.96732900 | -4.39927000 |
| F | 6.68726600  | -6.06972900 | -2.84930100 |
| F | 6.94576100  | -5.32572900 | -0.23782100 |
| C | -3.24143500 | -3.94631300 | 1.52221500  |
| C | -4.01063500 | -4.75053400 | 2.45353900  |
| H | -4.55788400 | -5.53510600 | 1.91376100  |
| C | -4.97106400 | -3.96020400 | 3.39715700  |
| H | -5.69959300 | -3.31428500 | 2.90274500  |
| C | -3.20192800 | -5.37621300 | 3.64046800  |
| H | -2.36741200 | -6.01955100 | 3.34840200  |
| C | -4.35058600 | -6.10739400 | 4.37866000  |
| H | -4.10042300 | -6.30149500 | 5.42664700  |
| H | -4.55721100 | -7.07468800 | 3.90813400  |
| C | -5.56593600 | -5.12863800 | 4.21760000  |
| H | -5.96283600 | -4.78708300 | 5.17879000  |
| H | -6.38913400 | -5.60588300 | 3.67487200  |
| C | -3.99960500 | -3.18853600 | 4.31682900  |
| H | -4.49999100 | -2.91057400 | 5.25051600  |
| C | -2.79612600 | -4.15664800 | 4.50909900  |
| H | -2.68357100 | -4.47571800 | 5.54896500  |
| C | -3.40349600 | -1.90873600 | 3.71828200  |
| N | -2.04752300 | -2.01273300 | 3.78186200  |
| H | -1.44852000 | -1.30069000 | 3.37095000  |
| C | -6.07036600 | -0.04398400 | -2.16225900 |
| C | -5.45083600 | -1.25378500 | -2.24840900 |
| C | -4.06977400 | -1.39005800 | -2.62059800 |
| C | -5.31725700 | 1.18327800  | -2.48388200 |
| H | -5.99046300 | -2.16152900 | -1.99103900 |
| C | -2.01081500 | -2.65837900 | -2.83560800 |
| H | -3.51079600 | 1.83471100  | -3.14743900 |
| C | -1.29441500 | -1.48248700 | -3.17430200 |
| C | -1.98652700 | -0.26843000 | -3.25177400 |
| H | -1.47151600 | -3.59711700 | -2.75476700 |
| C | -7.48981300 | 0.17723500  | -1.70997100 |
| H | -8.01900900 | 0.72192900  | -2.50425600 |
| H | -7.46472700 | 0.88469300  | -0.87006800 |
| C | 0.17507900  | -1.50651800 | -3.32903200 |
| H | 0.60197700  | -2.48961100 | -3.11574700 |

|   |             |             |             |
|---|-------------|-------------|-------------|
| H | 0.56527300  | -0.77666400 | -2.44320000 |
| C | 0.79065800  | -0.87608400 | -4.57360500 |
| H | 1.88186300  | -0.89639700 | -4.49792800 |
| H | 0.47759000  | 0.16491000  | -4.69880400 |
| H | 0.49613000  | -1.43211100 | -5.47365500 |
| C | -8.26522300 | -1.08106700 | -1.31961900 |
| H | -9.27986000 | -0.81811000 | -1.00410500 |
| H | -7.78338000 | -1.60699900 | -0.48666600 |
| H | -8.34862000 | -1.78165900 | -2.15909100 |
| C | -2.53122900 | -3.19345200 | 0.88851200  |
| C | 3.29823800  | 2.39245400  | 0.75449500  |
| C | 4.36780900  | 3.34905100  | 1.15281900  |
| C | 5.01916000  | 3.21361800  | 2.38406600  |
| C | 4.78988900  | 4.38621700  | 0.31495800  |
| C | 6.03930100  | 4.07891900  | 2.77414200  |
| C | 5.80194800  | 5.26770900  | 0.68688100  |
| C | 6.42919800  | 5.11035300  | 1.92166500  |
| F | 4.21454300  | 4.55373000  | -0.88418000 |
| F | 6.18191000  | 6.25267400  | -0.13425900 |
| F | 7.40339000  | 5.94652200  | 2.28646200  |
| F | 6.64285800  | 3.92887300  | 3.95724600  |
| F | 4.66896400  | 2.23008100  | 3.21879400  |
| C | -3.35085000 | -0.21655000 | -2.96901900 |
| C | -3.37011600 | -2.61315400 | -2.58536300 |
| H | -3.90654500 | -3.51628600 | -2.30685300 |
| H | -1.44376400 | 0.65338200  | -3.43780500 |
| N | -4.02819000 | 0.98489700  | -2.95408000 |
| O | -5.76502900 | 2.32423000  | -2.34916400 |
| C | -1.53694500 | -3.34253100 | 4.08253300  |
| H | -0.79492000 | -3.29834500 | 4.88736900  |
| H | -1.04731000 | -3.77863700 | 3.20269800  |
| O | -4.05240800 | -0.96240400 | 3.29026000  |

**<sup>5</sup>TS7-s**

|   |             |             |             |
|---|-------------|-------------|-------------|
| N | -0.70715500 | 2.20949100  | 0.31784600  |
| N | 1.27384700  | 0.20566400  | 0.20125900  |
| N | -0.73786000 | -1.74117600 | -0.17242100 |
| N | -2.73781900 | 0.25903200  | 0.08558200  |
| C | -1.78117100 | 3.01636400  | 0.60121000  |
| C | -1.34974200 | 4.39309300  | 0.61945900  |
| C | -0.02450800 | 4.40709000  | 0.30617100  |
| C | 0.38858600  | 3.03728900  | 0.15185700  |
| C | 1.70763800  | 2.61788000  | 0.01806700  |
| C | 2.11459100  | 1.28248900  | 0.13690500  |

|    |             |             |             |
|----|-------------|-------------|-------------|
| C  | 3.47695200  | 0.84752900  | 0.32771500  |
| C  | 3.43294600  | -0.49854200 | 0.54002700  |
| C  | 2.05273200  | -0.89499400 | 0.42971300  |
| C  | 1.60143100  | -2.22416200 | 0.43496600  |
| C  | 0.29498400  | -2.60364000 | 0.07069400  |
| C  | -0.12942600 | -3.95361200 | -0.18345700 |
| C  | -1.41780200 | -3.88443100 | -0.62615700 |
| C  | -1.80821300 | -2.49713400 | -0.57369800 |
| C  | -3.11667500 | -2.02745700 | -0.74528000 |
| C  | -3.54763600 | -0.75578200 | -0.35693300 |
| C  | -4.92740800 | -0.33485600 | -0.26634400 |
| C  | -4.92972600 | 0.91425100  | 0.26857600  |
| C  | -3.54785000 | 1.30455300  | 0.43746700  |
| H  | -1.99157800 | 5.23877600  | 0.82011600  |
| H  | 0.63211200  | 5.26167900  | 0.22434100  |
| H  | 4.34401300  | 1.49164400  | 0.29761800  |
| H  | 4.25343100  | -1.18063800 | 0.70640000  |
| H  | 0.47804300  | -4.82814900 | -0.01128200 |
| H  | -2.07165800 | -4.70398900 | -0.88666400 |
| H  | -5.78188600 | -0.93303000 | -0.54561400 |
| H  | -5.78486400 | 1.53292400  | 0.49659100  |
| Mn | -0.73436000 | 0.24778400  | 0.08429400  |
| Cl | -0.78024000 | -0.15352700 | 2.42234600  |
| O  | -0.74148800 | 0.51604800  | -1.65305200 |
| C  | 2.77869700  | 3.63762300  | -0.17641100 |
| C  | 3.16753700  | 4.02398300  | -1.45776000 |
| C  | 3.48899700  | 4.18055700  | 0.89666900  |
| C  | 4.23665600  | 4.88038000  | -1.68969300 |
| C  | 4.55424500  | 5.05616500  | 0.69680400  |
| C  | 4.92869300  | 5.40412000  | -0.60056400 |
| C  | -4.10352200 | -2.98063900 | -1.32361200 |
| C  | -4.00336700 | -3.36029600 | -2.66614400 |
| C  | -5.13067700 | -3.55525100 | -0.56973000 |
| C  | -4.88649200 | -4.26802300 | -3.24382700 |
| C  | -6.03134200 | -4.46088000 | -1.12701200 |
| C  | -5.90550900 | -4.81903700 | -2.46817700 |
| F  | 3.16274100  | 3.84208100  | 2.15042100  |
| F  | 5.22126800  | 5.56163600  | 1.73931500  |
| F  | 5.95324500  | 6.23469300  | -0.79688100 |
| F  | 4.59666700  | 5.19604000  | -2.93316200 |
| F  | 2.52595100  | 3.50940900  | -2.53356000 |
| F  | -5.27090400 | -3.23485000 | 0.72201900  |
| F  | -3.03220200 | -2.84454300 | -3.43821900 |
| F  | -4.76744300 | -4.60982100 | -4.53094700 |

|   |             |             |             |
|---|-------------|-------------|-------------|
| F | -6.76094200 | -5.68781900 | -3.01049200 |
| F | -7.00682300 | -4.99300700 | -0.38453900 |
| C | 3.15501600  | -4.04008600 | 1.49392900  |
| C | 3.80254600  | -4.95602100 | 2.41438300  |
| H | 4.66651200  | -5.43280100 | 1.93217100  |
| C | 4.22220600  | -4.34784200 | 3.79569500  |
| H | 4.90178200  | -3.49288200 | 3.74229200  |
| C | 2.87060800  | -6.02935300 | 3.06037100  |
| H | 2.31808900  | -6.66186300 | 2.36255700  |
| C | 3.88968300  | -6.76523400 | 3.96179000  |
| H | 3.39570500  | -7.29224800 | 4.78420300  |
| H | 4.45119700  | -7.50958400 | 3.38684300  |
| C | 4.82626000  | -5.60967900 | 4.46024400  |
| H | 4.84678600  | -5.52313900 | 5.55138500  |
| H | 5.85769600  | -5.76519600 | 4.12597800  |
| C | 2.87536500  | -4.05104700 | 4.50621400  |
| H | 3.01923300  | -4.10510800 | 5.58887300  |
| C | 1.95475100  | -5.18915300 | 3.97691700  |
| H | 1.52755900  | -5.81736600 | 4.76585000  |
| N | 0.87564600  | -3.15241000 | 3.57022800  |
| H | 0.23440700  | -2.48158200 | 3.15371300  |
| C | 6.16919600  | -0.07536400 | -2.08448800 |
| C | 5.52175700  | -1.26560500 | -2.22275800 |
| C | 4.13698600  | -1.35340100 | -2.59639700 |
| C | 5.44268800  | 1.18229200  | -2.34173400 |
| H | 6.04252200  | -2.19665800 | -2.01380200 |
| C | 2.04939300  | -2.56283900 | -2.87060800 |
| H | 3.65136800  | 1.90456400  | -2.97577300 |
| C | 1.36469600  | -1.35810900 | -3.16743100 |
| C | 2.08400900  | -0.15805700 | -3.18778100 |
| H | 1.48756600  | -3.49084800 | -2.82823300 |
| C | 7.59841500  | 0.09278200  | -1.63871500 |
| H | 8.12918000  | 0.66810600  | -2.40987400 |
| H | 7.59994000  | 0.75553800  | -0.76253200 |
| C | -0.10410600 | -1.33771000 | -3.33904500 |
| H | -0.56271700 | -2.31069600 | -3.14728300 |
| H | -0.47530800 | -0.60879900 | -2.44306300 |
| C | -0.68501100 | -0.66694000 | -4.57872900 |
| H | -1.77710700 | -0.65303100 | -4.51580400 |
| H | -0.33531700 | 0.36468400  | -4.68354000 |
| H | -0.39862800 | -1.21818300 | -5.48443100 |
| C | 8.35307400  | -1.19989500 | -1.32790800 |
| H | 9.37698100  | -0.97506700 | -1.01276000 |
| H | 7.87161000  | -1.76279900 | -0.51904700 |

|   |             |             |             |
|---|-------------|-------------|-------------|
| H | 8.41103600  | -1.85476100 | -2.20540100 |
| C | 2.49935600  | -3.23295800 | 0.86843000  |
| C | -3.10902100 | 2.59738900  | 0.74096700  |
| C | -4.11514600 | 3.62624700  | 1.12695800  |
| C | -4.13152500 | 4.15383500  | 2.42274200  |
| C | -5.05310600 | 4.12625200  | 0.21848400  |
| C | -5.04901300 | 5.12985200  | 2.80643200  |
| C | -5.98452800 | 5.09614400  | 0.58139200  |
| C | -5.97948000 | 5.59967800  | 1.88110900  |
| F | -5.07348400 | 3.66950600  | -1.04144000 |
| F | -6.87287700 | 5.55277000  | -0.30801500 |
| F | -6.86462600 | 6.53242500  | 2.23854900  |
| F | -5.04445500 | 5.61554000  | 4.05166700  |
| F | -3.24572300 | 3.72550900  | 3.32780700  |
| C | 3.44659300  | -0.14959200 | -2.89295500 |
| C | 3.40860400  | -2.55990500 | -2.61341100 |
| H | 3.92230900  | -3.48668000 | -2.37203700 |
| H | 1.56206700  | 0.78238900  | -3.33631700 |
| N | 4.14916900  | 1.03589800  | -2.81693100 |
| O | 5.91720600  | 2.30494200  | -2.15044500 |
| C | 0.78861300  | -4.47925300 | 3.27726200  |
| C | 2.13905600  | -2.72351700 | 4.15230100  |
| H | 1.96540700  | -2.10969500 | 5.04294500  |
| H | 2.71004900  | -2.11731200 | 3.43745400  |
| O | -0.07298200 | -5.03095200 | 2.60403400  |

**<sup>3</sup>TS8-R**

|   |             |             |             |
|---|-------------|-------------|-------------|
| N | 1.00021300  | -1.83700800 | 0.35587000  |
| N | 2.71213000  | 0.39574900  | 0.23165000  |
| N | 0.47503100  | 2.07557600  | 0.63241000  |
| N | -1.19225400 | -0.20120900 | 0.82055500  |
| C | 0.14951200  | -2.80678400 | 0.82043300  |
| C | 0.70856600  | -4.09993000 | 0.52159300  |
| C | 1.87428800  | -3.89229200 | -0.15203200 |
| C | 2.08181600  | -2.46670700 | -0.20992600 |
| C | 3.27350600  | -1.84394000 | -0.60043200 |
| C | 3.58629200  | -0.51072600 | -0.30039000 |
| C | 4.89552400  | 0.09502400  | -0.39051500 |
| C | 4.79281300  | 1.34624300  | 0.13394300  |
| C | 3.40230100  | 1.55376700  | 0.47280100  |
| C | 2.82566200  | 2.78705200  | 0.80347700  |
| C | 1.44479500  | 3.02598700  | 0.79128900  |
| C | 0.82649800  | 4.33193400  | 0.75952500  |
| C | -0.50041900 | 4.14210000  | 0.51294400  |

|    |             |             |             |
|----|-------------|-------------|-------------|
| C  | -0.72057500 | 2.71604600  | 0.45887200  |
| C  | -1.97316700 | 2.09356300  | 0.39602800  |
| C  | -2.18171800 | 0.73615100  | 0.68030100  |
| C  | -3.44523600 | 0.14165300  | 1.05153400  |
| C  | -3.17929300 | -1.11718700 | 1.49745300  |
| C  | -1.76965100 | -1.35249400 | 1.29645700  |
| C  | -1.11753400 | -2.58772800 | 1.37944700  |
| H  | 0.23630900  | -5.04367700 | 0.75121400  |
| H  | 2.55870700  | -4.63506400 | -0.53569900 |
| H  | 5.78384000  | -0.38804300 | -0.76906900 |
| H  | 5.57822300  | 2.07874700  | 0.24654700  |
| H  | 1.35220100  | 5.26922700  | 0.87267800  |
| H  | -1.27314500 | 4.89219800  | 0.42037900  |
| H  | -4.40550500 | 0.63162600  | 1.01489500  |
| H  | -3.88694300 | -1.83861800 | 1.87540100  |
| Mn | 0.75035300  | 0.10747900  | 0.47578400  |
| Cl | 1.12091100  | 0.04225100  | 2.78733200  |
| O  | 0.51975600  | 0.37125200  | -1.20710700 |
| C  | 3.71560000  | 3.95503400  | 1.05603000  |
| C  | 4.47745200  | 4.54572600  | 0.04322100  |
| C  | 3.78562700  | 4.52877300  | 2.33041800  |
| C  | 5.29401500  | 5.64786600  | 0.28435400  |
| C  | 4.59025100  | 5.63581100  | 2.59330600  |
| C  | 5.34777200  | 6.19447800  | 1.56544900  |
| C  | 4.27744500  | -2.68648800 | -1.30581600 |
| C  | 4.01084500  | -3.15316800 | -2.59785800 |
| C  | 5.48853900  | -3.07239100 | -0.72404200 |
| C  | 4.90973400  | -3.95805800 | -3.29227400 |
| C  | 6.40738400  | -3.87159400 | -1.40115500 |
| C  | 6.11426100  | -4.31688200 | -2.68898700 |
| C  | -3.14425100 | 2.92998900  | 0.01777400  |
| C  | -3.25258700 | 3.38461800  | -1.30037800 |
| C  | -4.19237600 | 3.24137300  | 0.88843800  |
| C  | -4.36848200 | 4.08128300  | -1.74963800 |
| C  | -5.32524200 | 3.92687000  | 0.45675600  |
| C  | -5.41208800 | 4.34301100  | -0.86891500 |
| F  | 4.43442800  | 4.05105700  | -1.20208200 |
| F  | 6.01477500  | 6.18971900  | -0.70357900 |
| F  | 6.12348600  | 7.25344700  | 1.80673600  |
| F  | 4.64147700  | 6.16305700  | 3.82038900  |
| F  | 3.06480300  | 4.01692300  | 3.33243300  |
| F  | 5.79318700  | -2.67038500 | 0.51661000  |
| F  | 7.55961400  | -4.22183600 | -0.82130800 |
| F  | 6.98586700  | -5.08579700 | -3.34424000 |

|   |             |             |             |
|---|-------------|-------------|-------------|
| F | 4.62856300  | -4.38459600 | -4.52737000 |
| F | 2.85734300  | -2.82709700 | -3.20262400 |
| F | -4.14395100 | 2.84527800  | 2.16766000  |
| F | -2.29180600 | 3.09589600  | -2.18992300 |
| F | -4.48381400 | 4.41898100  | -3.04103800 |
| F | -6.52653400 | 4.93576300  | -1.31130300 |
| F | -6.34487300 | 4.15275100  | 1.29200500  |
| C | -6.39569300 | 0.41539300  | -2.05652500 |
| C | -5.68002200 | -0.71629600 | -1.67506400 |
| C | -4.35188500 | -0.89977500 | -2.09316400 |
| C | -3.70975500 | 0.07514700  | -2.89511700 |
| C | -4.45498200 | 1.20593900  | -3.28978000 |
| C | -5.76643100 | 1.37401800  | -2.88211800 |
| H | -6.14683400 | -1.46941100 | -1.04382400 |
| C | -2.32727100 | -0.11681500 | -3.21885100 |
| H | -3.97121800 | 1.96740100  | -3.89378500 |
| H | -6.31276100 | 2.26407700  | -3.18282500 |
| C | -1.62043300 | -1.21431000 | -2.80965400 |
| C | -2.29038000 | -2.25630900 | -2.00865900 |
| H | -1.82848400 | 0.66734100  | -3.78120000 |
| C | -7.81130300 | 0.63904400  | -1.57065100 |
| H | -8.20139700 | -0.28953900 | -1.13730000 |
| H | -8.45589700 | 0.87905100  | -2.42666500 |
| O | -1.74141900 | -3.27499100 | -1.58901700 |
| C | -0.16043300 | -1.37878200 | -2.98708700 |
| H | 0.13763800  | -2.42153200 | -2.85181800 |
| H | 0.27983500  | -0.83480800 | -2.05015800 |
| C | 0.50735600  | -0.70724500 | -4.17788300 |
| H | 1.57969200  | -0.91894400 | -4.16564200 |
| H | 0.38140000  | 0.38012800  | -4.15079800 |
| H | 0.09236400  | -1.07988400 | -5.12304700 |
| C | -7.91709300 | 1.77171200  | -0.53276400 |
| H | -8.94503200 | 1.86563900  | -0.16581600 |
| H | -7.62952100 | 2.73573700  | -0.96228900 |
| H | -7.26687600 | 1.58007000  | 0.32850700  |
| N | -3.63162200 | -2.01529000 | -1.72772000 |
| H | -4.05754100 | -2.70416200 | -1.12110400 |
| C | -1.77113600 | -3.74814600 | 2.04549600  |
| C | -2.96591700 | -4.34701500 | 1.63352800  |
| C | -1.14282500 | -4.31780700 | 3.16547300  |
| C | -3.51811900 | -5.44151300 | 2.29452200  |
| C | -1.67126700 | -5.41706500 | 3.83762200  |
| C | -2.86668300 | -5.98235700 | 3.39957300  |
| F | -3.65399000 | -3.87652800 | 0.57754600  |

|   |             |             |            |
|---|-------------|-------------|------------|
| F | 0.00551700  | -3.80636300 | 3.61730200 |
| F | -1.04229000 | -5.92897400 | 4.89925200 |
| F | -3.38653000 | -7.03326200 | 4.03611000 |
| F | -4.66707300 | -5.97719400 | 1.86647900 |

**<sup>3</sup>TS8-S**

|    |             |             |             |
|----|-------------|-------------|-------------|
| N  | -1.00029100 | -1.83699500 | 0.35583100  |
| N  | -2.71212300 | 0.39583100  | 0.23164900  |
| N  | -0.47496100 | 2.07556500  | 0.63244400  |
| N  | 1.19223900  | -0.20128900 | 0.82055100  |
| C  | -0.14962400 | -2.80681400 | 0.82036500  |
| C  | -0.70872400 | -4.09993200 | 0.52148700  |
| C  | -1.87443700 | -3.89223300 | -0.15213600 |
| C  | -2.08191400 | -2.46663800 | -0.20998800 |
| C  | -3.27357600 | -1.84381600 | -0.60049000 |
| C  | -3.58631600 | -0.51060000 | -0.30041400 |
| C  | -4.89552400 | 0.09520300  | -0.39053800 |
| C  | -4.79276900 | 1.34640700  | 0.13394700  |
| C  | -3.40225100 | 1.55387100  | 0.47281700  |
| C  | -2.82556600 | 2.78712700  | 0.80351900  |
| C  | -1.44469000 | 3.02601000  | 0.79133900  |
| C  | -0.82634300 | 4.33193400  | 0.75960700  |
| C  | 0.50056800  | 4.14205500  | 0.51303300  |
| C  | 0.72067000  | 2.71599400  | 0.45892900  |
| C  | 1.97324000  | 2.09346600  | 0.39608400  |
| C  | 2.18173800  | 0.73603700  | 0.68032000  |
| C  | 3.44523500  | 0.14148300  | 1.05153800  |
| C  | 3.17924600  | -1.11736000 | 1.49742000  |
| C  | 1.76959400  | -1.35260700 | 1.29642300  |
| C  | 1.11743200  | -2.58782000 | 1.37937800  |
| H  | -0.23650000 | -5.04370200 | 0.75107900  |
| H  | -2.55888100 | -4.63496900 | -0.53582800 |
| H  | -5.78385600 | -0.38782200 | -0.76911000 |
| H  | -5.57815100 | 2.07893900  | 0.24655900  |
| H  | -1.35201100 | 5.26924400  | 0.87277900  |
| H  | 1.27332400  | 4.89212600  | 0.42049200  |
| H  | 4.40552200  | 0.63142100  | 1.01491200  |
| H  | 3.88687000  | -1.83882800 | 1.87534600  |
| Mn | -0.75035800 | 0.10748000  | 0.47578500  |
| Cl | -1.12092300 | 0.04222800  | 2.78733300  |
| O  | -0.51975000 | 0.37124600  | -1.20709900 |
| C  | -3.71545900 | 3.95513800  | 1.05609300  |
| C  | -4.47728700 | 4.54587900  | 0.04329400  |
| C  | -3.78546800 | 4.52885300  | 2.33049300  |



|   |             |             |             |
|---|-------------|-------------|-------------|
| C | -5.29380900 | 5.64804400  | 0.28444800  |
| C | -4.59005200 | 5.63591500  | 2.59340100  |
| C | -5.34755000 | 6.19463200  | 1.56555400  |
| C | -4.27752800 | -2.68630200 | -1.30592800 |
| C | -4.01091800 | -3.15292700 | -2.59798800 |
| C | -5.48864400 | -3.07219700 | -0.72419500 |
| C | -4.90981800 | -3.95775700 | -3.29245900 |
| C | -6.40750000 | -3.87134000 | -1.40136300 |
| C | -6.11436600 | -4.31657500 | -2.68921100 |
| C | 3.14436100  | 2.92986600  | 0.01789000  |
| C | 3.25274500  | 3.38454900  | -1.30023900 |
| C | 4.19247200  | 3.24118300  | 0.88859600  |
| C | 4.36867300  | 4.08120000  | -1.74943900 |
| C | 5.32537100  | 3.92666400  | 0.45697400  |
| C | 5.41226600  | 4.34285500  | -0.86867800 |
| F | -4.43427900 | 4.05123300  | -1.20201900 |
| F | -6.01454700 | 6.18994400  | -0.70347500 |
| F | -6.12322500 | 7.25362500  | 1.80686100  |
| F | -4.64126100 | 6.16313900  | 3.82049500  |
| F | -3.06466600 | 4.01695600  | 3.33249900  |
| F | -5.79330300 | -2.67024000 | 0.51647100  |
| F | -7.55975100 | -4.22157700 | -0.82155500 |
| F | -6.98598300 | -5.08543300 | -3.34451700 |
| F | -4.62863800 | -4.38424200 | -4.52757100 |
| F | -2.85739700 | -2.82685600 | -3.20271900 |
| F | 4.14399900  | 2.84503900  | 2.16780100  |
| F | 2.29197900  | 3.09589300  | -2.18982200 |
| F | 4.48405000  | 4.41894900  | -3.04082200 |
| F | 6.52674300  | 4.93558700  | -1.31101300 |
| F | 6.34498500  | 4.15248100  | 1.29226000  |
| C | 6.39564400  | 0.41541200  | -2.05663700 |
| C | 5.67995900  | -0.71616700 | -1.67487500 |
| C | 4.35183200  | -0.89975800 | -2.09295900 |
| C | 3.70972600  | 0.07494500  | -2.89519700 |
| C | 4.45497000  | 1.20562000  | -3.29016300 |
| C | 5.76641000  | 1.37380500  | -2.88251800 |
| H | 6.14675100  | -1.46910700 | -1.04341200 |
| C | 2.32724900  | -0.11709800 | -3.21890900 |
| H | 3.97122500  | 1.96691400  | -3.89439600 |
| H | 6.31275300  | 2.26377500  | -3.18346500 |
| C | 1.62040200  | -1.21448800 | -2.80944800 |
| C | 2.29032500  | -2.25627100 | -2.00815100 |
| H | 1.82848000  | 0.66690400  | -3.78148700 |
| C | 7.81124200  | 0.63919600  | -1.57078700 |

|   |             |             |             |
|---|-------------|-------------|-------------|
| H | 8.20131800  | -0.28926100 | -1.13715100 |
| H | 8.45586300  | 0.87894700  | -2.42685300 |
| O | 1.74134600  | -3.27482700 | -1.58822800 |
| C | 0.16040700  | -1.37901300 | -2.98688800 |
| H | -0.13764400 | -2.42174500 | -2.85143200 |
| H | -0.27989500 | -0.83488900 | -2.05006200 |
| C | -0.50736000 | -0.70772200 | -4.17783600 |
| H | -1.57968800 | -0.91946000 | -4.16559300 |
| H | -0.38144700 | 0.37966000  | -4.15094800 |
| H | -0.09232000 | -1.08052200 | -5.12291600 |
| C | 7.91700700  | 1.77217200  | -0.53323300 |
| H | 8.94493400  | 1.86619900  | -0.16627800 |
| H | 7.62945800  | 2.73607200  | -0.96305600 |
| H | 7.26675800  | 1.58079100  | 0.32807100  |
| N | 3.63155800  | -2.01517200 | -1.72723000 |
| H | 4.05745700  | -2.70387600 | -1.12040900 |
| C | 1.77099800  | -3.74828300 | 2.04538500  |
| C | 2.96575200  | -4.34718200 | 1.63338400  |
| C | 1.14268000  | -4.31795700 | 3.16535100  |
| C | 3.51792200  | -5.44172200 | 2.29433500  |
| C | 1.67108900  | -5.41725700 | 3.83745800  |
| C | 2.86648000  | -5.98257700 | 3.39937700  |
| F | 3.65382700  | -3.87668500 | 0.57740800  |
| F | -0.00563900 | -3.80648600 | 3.61721000  |
| F | 1.04210700  | -5.92917700 | 4.89907800  |
| F | 3.38629600  | -7.03352200 | 4.03587300  |
| F | 4.66685100  | -5.97743100 | 1.86626000  |

**<sup>5</sup>TS8-R**

|   |             |             |            |
|---|-------------|-------------|------------|
| C | -2.04887500 | 0.47932100  | 0.84358000 |
| C | -3.26885500 | -0.25110500 | 1.08893300 |
| C | -2.91164400 | -1.51689700 | 1.43520000 |
| C | -1.47253300 | -1.59578900 | 1.34426200 |
| N | -0.97870800 | -0.36417600 | 0.99941200 |
| H | -4.26643700 | 0.15362500  | 1.01324500 |
| H | -3.56107100 | -2.34988900 | 1.65524100 |
| C | 2.52631600  | -2.40950900 | 0.06352100 |
| C | 2.52316300  | -3.82969600 | 0.31835500 |
| C | 1.35890500  | -4.11513700 | 0.96102100 |
| C | 0.60640900  | -2.88625000 | 1.04379800 |
| N | 1.35985800  | -1.86355000 | 0.52030900 |
| H | 3.33109000  | -4.50535400 | 0.07765200 |
| H | 1.02862200  | -5.07394200 | 1.33063100 |
| C | 1.39089700  | 3.06975300  | 0.72090000 |

|    |             |             |             |
|----|-------------|-------------|-------------|
| C  | 0.66212700  | 4.31354300  | 0.78210200  |
| C  | -0.65943500 | 4.00855200  | 0.67020500  |
| C  | -0.75940900 | 2.57141700  | 0.59930600  |
| N  | 0.50282300  | 2.02993200  | 0.63652300  |
| H  | 1.11237400  | 5.29230800  | 0.86342800  |
| H  | -1.49818800 | 4.68949700  | 0.67420300  |
| C  | 3.42567300  | 1.77811500  | 0.23585200  |
| C  | 4.79587100  | 1.67962600  | -0.20864400 |
| C  | 4.99032500  | 0.40121500  | -0.62730600 |
| C  | 3.76794600  | -0.32123800 | -0.36628200 |
| N  | 2.82839200  | 0.54670200  | 0.13792600  |
| H  | 5.50535700  | 2.49339100  | -0.22538600 |
| H  | 5.89191400  | -0.02627400 | -1.03992800 |
| C  | -1.96007900 | 1.85639900  | 0.59499800  |
| C  | 3.62069800  | -1.70584900 | -0.45812300 |
| C  | -0.73110600 | -2.78150000 | 1.44109000  |
| C  | 2.77926700  | 2.96476200  | 0.59082500  |
| Mn | 0.92954000  | 0.09584100  | 0.56717100  |
| Cl | 1.41600900  | 0.08937600  | 2.84216500  |
| O  | 0.54310700  | 0.11022300  | -1.16427300 |
| C  | 3.58072800  | 4.21290700  | 0.72836800  |
| C  | 4.17648400  | 4.83923100  | -0.37048300 |
| C  | 3.73560100  | 4.82328500  | 1.97780500  |
| C  | 4.91400400  | 6.01319200  | -0.23776600 |
| C  | 4.46225700  | 6.00212100  | 2.13346000  |
| C  | 5.05451200  | 6.59633100  | 1.02044300  |
| C  | 4.71291800  | -2.51263100 | -1.06940700 |
| C  | 4.49452500  | -3.19027500 | -2.27400400 |
| C  | 5.96729100  | -2.66045300 | -0.46962500 |
| C  | 5.48097200  | -3.97316700 | -2.86827000 |
| C  | 6.97204200  | -3.43303800 | -1.04816100 |
| C  | 6.72522700  | -4.09246700 | -2.25112500 |
| C  | -1.45713900 | -4.01310000 | 1.85126800  |
| C  | -1.61637400 | -5.10645000 | 0.98951600  |
| C  | -2.06328700 | -4.09907500 | 3.11061800  |
| C  | -2.34815100 | -6.23104500 | 1.36127400  |
| C  | -2.80167700 | -5.21320200 | 3.50040800  |
| C  | -2.94335900 | -6.28359600 | 2.61971500  |
| C  | -3.19898600 | 2.63169400  | 0.31667200  |
| C  | -3.35269400 | 3.24818300  | -0.93055900 |
| C  | -4.23137600 | 2.80744600  | 1.24361900  |
| C  | -4.48009000 | 3.99377000  | -1.25392400 |
| C  | -5.37893300 | 3.53654700  | 0.93628000  |
| C  | -5.49555200 | 4.13894800  | -0.31412700 |

|   |             |             |             |
|---|-------------|-------------|-------------|
| F | -4.13861500 | 2.26401400  | 2.46389000  |
| F | -6.35965000 | 3.67272200  | 1.83424500  |
| F | -6.59692900 | 4.83221400  | -0.62422500 |
| F | 3.17224400  | 4.27782200  | 3.06021100  |
| F | 6.22926400  | -2.04889200 | 0.69250600  |
| F | 8.16343000  | -3.55395300 | -0.45406000 |
| F | 7.67954000  | -4.83769200 | -2.81181800 |
| F | -1.95368000 | -3.08213300 | 3.97471800  |
| F | -3.36970800 | -5.26405600 | 4.71063200  |
| F | -3.64632400 | -7.35941200 | 2.98267700  |
| F | -2.48417300 | -7.26012300 | 0.51788300  |
| F | -1.05222100 | -5.10855900 | -0.22216300 |
| F | -2.40250100 | 3.10808000  | -1.86769600 |
| F | -4.60976300 | 4.53749400  | -2.47070200 |
| F | 3.30652900  | -3.09796200 | -2.88892800 |
| F | 5.24511100  | -4.60589400 | -4.02183300 |
| F | 4.04863300  | 4.30671300  | -1.59408900 |
| F | 5.47681800  | 6.58754000  | -1.30649600 |
| F | 5.75503800  | 7.72390900  | 1.15857000  |
| F | 4.59646300  | 6.56393100  | 3.33869900  |
| C | -6.77654400 | 0.92863000  | -2.71405100 |
| C | -6.37599500 | -0.28870100 | -2.16788400 |
| C | -5.02632500 | -0.66679500 | -2.18054100 |
| C | -4.04128100 | 0.18336100  | -2.74486200 |
| C | -4.46654100 | 1.40715400  | -3.30361200 |
| C | -5.80150700 | 1.77318200  | -3.28719800 |
| H | -7.11394900 | -0.95550300 | -1.72619000 |
| C | -2.67447400 | -0.24236100 | -2.70347200 |
| H | -3.72298000 | 2.07596300  | -3.72469900 |
| H | -6.10163500 | 2.73113000  | -3.70118400 |
| C | -2.28360200 | -1.44100700 | -2.16377900 |
| C | -3.29980600 | -2.32593600 | -1.55906000 |
| H | -1.91586600 | 0.43254400  | -3.09308200 |
| C | -8.22451300 | 1.35733100  | -2.63803300 |
| H | -8.87350400 | 0.47736500  | -2.72818200 |
| H | -8.45998100 | 2.01130100  | -3.48635400 |
| O | -3.07192000 | -3.40011900 | -1.00480100 |
| C | -0.86736900 | -1.87412000 | -2.10934500 |
| H | -0.76088100 | -2.78108700 | -1.51122900 |
| C | -8.54523600 | 2.09218800  | -1.32228600 |
| H | -9.60747800 | 2.35632800  | -1.27489700 |
| H | -7.96411100 | 3.01396600  | -1.23151500 |
| H | -8.31258200 | 1.46076900  | -0.45693800 |
| N | -4.61015900 | -1.86529500 | -1.64192000 |

|   |             |             |             |
|---|-------------|-------------|-------------|
| H | -5.29180200 | -2.48638600 | -1.22101500 |
| C | -0.11313400 | -1.96404600 | -3.43462100 |
| H | -0.16705000 | -1.02333900 | -3.99268900 |
| H | -0.53552700 | -2.75908700 | -4.06267000 |
| H | 0.94124900  | -2.18957600 | -3.24999300 |
| H | -0.27835300 | -1.02373600 | -1.52690700 |

**<sup>5</sup>TS8-S**

|    |             |             |             |
|----|-------------|-------------|-------------|
| C  | 2.04887500  | 0.47932100  | 0.84358000  |
| C  | 3.26885500  | -0.25110500 | 1.08893300  |
| C  | 2.91164400  | -1.51689700 | 1.43520000  |
| C  | 1.47253300  | -1.59578900 | 1.34426200  |
| N  | 0.97870800  | -0.36417600 | 0.99941200  |
| H  | 4.26643700  | 0.15362500  | 1.01324500  |
| H  | 3.56107100  | -2.34988900 | 1.65524100  |
| C  | -2.52631600 | -2.40950900 | 0.06352100  |
| C  | -2.52316300 | -3.82969600 | 0.31835500  |
| C  | -1.35890500 | -4.11513700 | 0.96102100  |
| C  | -0.60640900 | -2.88625000 | 1.04379800  |
| N  | -1.35985800 | -1.86355000 | 0.52030900  |
| H  | -3.33109000 | -4.50535400 | 0.07765200  |
| H  | -1.02862200 | -5.07394200 | 1.33063100  |
| C  | -1.39089700 | 3.06975300  | 0.72090000  |
| C  | -0.66212700 | 4.31354300  | 0.78210200  |
| C  | 0.65943500  | 4.00855200  | 0.67020500  |
| C  | 0.75940900  | 2.57141700  | 0.59930600  |
| N  | -0.50282300 | 2.02993200  | 0.63652300  |
| H  | -1.11237400 | 5.29230800  | 0.86342800  |
| H  | 1.49818800  | 4.68949700  | 0.67420300  |
| C  | -3.42567300 | 1.77811500  | 0.23585200  |
| C  | -4.79587100 | 1.67962600  | -0.20864400 |
| C  | -4.99032500 | 0.40121500  | -0.62730600 |
| C  | -3.76794600 | -0.32123800 | -0.36628200 |
| N  | -2.82839200 | 0.54670200  | 0.13792600  |
| H  | -5.50535700 | 2.49339100  | -0.22538600 |
| H  | -5.89191400 | -0.02627400 | -1.03992800 |
| C  | 1.96007900  | 1.85639900  | 0.59499800  |
| C  | -3.62069800 | -1.70584900 | -0.45812300 |
| C  | 0.73110600  | -2.78150000 | 1.44109000  |
| C  | -2.77926700 | 2.96476200  | 0.59082500  |
| Mn | -0.92954000 | 0.09584100  | 0.56717100  |
| Cl | -1.41600900 | 0.08937600  | 2.84216500  |
| O  | -0.54310700 | 0.11022300  | -1.16427300 |
| C  | -3.58072800 | 4.21290700  | 0.72836800  |

|   |             |             |             |
|---|-------------|-------------|-------------|
| C | -4.17648400 | 4.83923100  | -0.37048300 |
| C | -3.73560100 | 4.82328500  | 1.97780500  |
| C | -4.91400400 | 6.01319200  | -0.23776600 |
| C | -4.46225700 | 6.00212100  | 2.13346000  |
| C | -5.05451200 | 6.59633100  | 1.02044300  |
| C | -4.71291800 | -2.51263100 | -1.06940700 |
| C | -4.49452500 | -3.19027500 | -2.27400400 |
| C | -5.96729100 | -2.66045300 | -0.46962500 |
| C | -5.48097200 | -3.97316700 | -2.86827000 |
| C | -6.97204200 | -3.43303800 | -1.04816100 |
| C | -6.72522700 | -4.09246700 | -2.25112500 |
| C | 1.45713900  | -4.01310000 | 1.85126800  |
| C | 1.61637400  | -5.10645000 | 0.98951600  |
| C | 2.06328700  | -4.09907500 | 3.11061800  |
| C | 2.34815100  | -6.23104500 | 1.36127400  |
| C | 2.80167700  | -5.21320200 | 3.50040800  |
| C | 2.94335900  | -6.28359600 | 2.61971500  |
| C | 3.19898600  | 2.63169400  | 0.31667200  |
| C | 3.35269400  | 3.24818300  | -0.93055900 |
| C | 4.23137600  | 2.80744600  | 1.24361900  |
| C | 4.48009000  | 3.99377000  | -1.25392400 |
| C | 5.37893300  | 3.53654700  | 0.93628000  |
| C | 5.49555200  | 4.13894800  | -0.31412700 |
| F | 4.13861500  | 2.26401400  | 2.46389000  |
| F | 6.35965000  | 3.67272200  | 1.83424500  |
| F | 6.59692900  | 4.83221400  | -0.62422500 |
| F | -3.17224400 | 4.27782200  | 3.06021100  |
| F | -6.22926400 | -2.04889200 | 0.69250600  |
| F | -8.16343000 | -3.55395300 | -0.45406000 |
| F | -7.67954000 | -4.83769200 | -2.81181800 |
| F | 1.95368000  | -3.08213300 | 3.97471800  |
| F | 3.36970800  | -5.26405600 | 4.71063200  |
| F | 3.64632400  | -7.35941200 | 2.98267700  |
| F | 2.48417300  | -7.26012300 | 0.51788300  |
| F | 1.05222100  | -5.10855900 | -0.22216300 |
| F | 2.40250100  | 3.10808000  | -1.86769600 |
| F | 4.60976300  | 4.53749400  | -2.47070200 |
| F | -3.30652900 | -3.09796200 | -2.88892800 |
| F | -5.24511100 | -4.60589400 | -4.02183300 |
| F | -4.04863300 | 4.30671300  | -1.59408900 |
| F | -5.47681800 | 6.58754000  | -1.30649600 |
| F | -5.75503800 | 7.72390900  | 1.15857000  |
| F | -4.59646300 | 6.56393100  | 3.33869900  |
| C | 6.77654400  | 0.92863000  | -2.71405100 |

|   |             |             |             |
|---|-------------|-------------|-------------|
| C | 6.37599500  | -0.28870100 | -2.16788400 |
| C | 5.02632500  | -0.66679500 | -2.18054100 |
| C | 4.04128100  | 0.18336100  | -2.74486200 |
| C | 4.46654100  | 1.40715400  | -3.30361200 |
| C | 5.80150700  | 1.77318200  | -3.28719800 |
| H | 7.11394900  | -0.95550300 | -1.72619000 |
| C | 2.67447400  | -0.24236100 | -2.70347200 |
| H | 3.72298000  | 2.07596300  | -3.72469900 |
| H | 6.10163500  | 2.73113000  | -3.70118400 |
| C | 2.28360200  | -1.44100700 | -2.16377900 |
| C | 3.29980600  | -2.32593600 | -1.55906000 |
| H | 1.91586600  | 0.43254400  | -3.09308200 |
| C | 8.22451300  | 1.35733100  | -2.63803300 |
| H | 8.87350400  | 0.47736500  | -2.72818200 |
| H | 8.45998100  | 2.01130100  | -3.48635400 |
| O | 3.07192000  | -3.40011900 | -1.00480100 |
| C | 0.86736900  | -1.87412000 | -2.10934500 |
| H | 0.76088100  | -2.78108700 | -1.51122900 |
| C | 8.54523600  | 2.09218800  | -1.32228600 |
| H | 9.60747800  | 2.35632800  | -1.27489700 |
| H | 7.96411100  | 3.01396600  | -1.23151500 |
| H | 8.31258200  | 1.46076900  | -0.45693800 |
| N | 4.61015900  | -1.86529500 | -1.64192000 |
| H | 5.29180200  | -2.48638600 | -1.22101500 |
| C | 0.11313400  | -1.96404600 | -3.43462100 |
| H | 0.16705000  | -1.02333900 | -3.99268900 |
| H | 0.53552700  | -2.75908700 | -4.06267000 |
| H | -0.94124900 | -2.18957600 | -3.24999300 |
| H | 0.27835300  | -1.02373600 | -1.52690700 |

**<sup>3</sup>TS9-R**

|   |             |             |             |
|---|-------------|-------------|-------------|
| N | -0.12838000 | 1.97187500  | -0.67641000 |
| N | 0.94837200  | -0.63934100 | -1.00712800 |
| N | -1.58224000 | -1.74944300 | -0.37769800 |
| N | -2.68357500 | 0.85540700  | -0.13769700 |
| C | -0.85348900 | 3.13326200  | -0.74370800 |
| C | 0.05401900  | 4.25199200  | -0.85847400 |
| C | 1.31577800  | 3.75136700  | -0.79666500 |
| C | 1.19758000  | 2.31356500  | -0.71354700 |
| C | 2.27595300  | 1.43110000  | -0.83095500 |
| C | 2.12506400  | 0.06110900  | -1.08164200 |
| C | 3.17060500  | -0.81538600 | -1.55763500 |
| C | 2.60022100  | -2.03047100 | -1.78572400 |
| C | 1.21402400  | -1.92809200 | -1.39891100 |

|    |             |             |             |
|----|-------------|-------------|-------------|
| C  | 0.32934300  | -3.00426400 | -1.30141300 |
| C  | -0.95964400 | -2.90800900 | -0.77036700 |
| C  | -1.80411200 | -4.03163200 | -0.45303300 |
| C  | -2.92142300 | -3.53681000 | 0.14829600  |
| C  | -2.79067200 | -2.10129400 | 0.17176700  |
| C  | -3.79814100 | -1.21880300 | 0.57664100  |
| C  | -3.75054300 | 0.16207300  | 0.37154200  |
| C  | -4.85410900 | 1.07144500  | 0.57801000  |
| C  | -4.44591300 | 2.29542700  | 0.15179100  |
| C  | -3.06968900 | 2.16148800  | -0.26945400 |
| H  | -0.24193900 | 5.28569800  | -0.95734400 |
| H  | 2.24882000  | 4.29260400  | -0.85546000 |
| H  | 4.19321000  | -0.52426100 | -1.74473700 |
| H  | 3.07358700  | -2.92192000 | -2.17143900 |
| H  | -1.56072800 | -5.06524600 | -0.65212400 |
| H  | -3.77742500 | -4.08703700 | 0.51107800  |
| H  | -5.81833400 | 0.79924600  | 0.98124400  |
| H  | -5.00534000 | 3.21952100  | 0.15560500  |
| Mn | -0.85647300 | 0.10346800  | -0.51013500 |
| Cl | -1.38349000 | 0.16280800  | -2.78452700 |
| O  | -0.49661700 | 0.18275000  | 1.16700600  |
| C  | 3.64686800  | 2.00153500  | -0.70751100 |
| C  | 4.06604700  | 2.52459300  | 0.52200100  |
| C  | 4.55894100  | 2.05472700  | -1.76581500 |
| C  | 5.33319300  | 3.07252700  | 0.69283500  |
| C  | 5.84533300  | 2.56374500  | -1.60755200 |
| C  | 6.22972500  | 3.07720800  | -0.37205800 |
| C  | -5.02903500 | -1.80871000 | 1.17504500  |
| C  | -5.00864700 | -2.36420300 | 2.45769700  |
| C  | -6.23938600 | -1.85394900 | 0.47581800  |
| C  | -6.14001000 | -2.94084400 | 3.02955700  |
| C  | -7.38683000 | -2.41795200 | 1.02954300  |
| C  | -7.33405700 | -2.96516400 | 2.31064800  |
| F  | 4.20918700  | 1.59036000  | -2.97464600 |
| F  | 6.69977200  | 2.57687200  | -2.63245800 |
| F  | 7.46241300  | 3.55968900  | -0.19994100 |
| F  | 5.70627500  | 3.56243200  | 1.88123700  |
| F  | 3.24114100  | 2.49903100  | 1.57706700  |
| F  | -6.31624300 | -1.34134400 | -0.75783000 |
| F  | -3.87462700 | -2.35200700 | 3.17406300  |
| F  | -6.08969500 | -3.46323200 | 4.25887900  |
| F  | -8.42576500 | -3.51111700 | 2.84877500  |
| F  | -8.53115500 | -2.44521700 | 0.34022500  |
| C  | 6.41899300  | 0.61923100  | 2.39831600  |



|   |             |             |             |
|---|-------------|-------------|-------------|
| C | 5.44157700  | 0.66891200  | 3.34614000  |
| C | 4.19077600  | -0.02457700 | 3.21098700  |
| C | 6.19052900  | -0.14322300 | 1.15801700  |
| H | 5.59461700  | 1.27359800  | 4.23805800  |
| C | 1.92928100  | -0.57889900 | 3.91773500  |
| H | 4.86721700  | -1.41443500 | 0.28130200  |
| C | 1.74567300  | -1.38497800 | 2.76933000  |
| C | 2.80272000  | -1.52210500 | 1.86646700  |
| H | 1.11795300  | -0.45783400 | 4.62703300  |
| C | 7.73660400  | 1.33743000  | 2.51802200  |
| H | 7.68831800  | 2.04155300  | 3.35631200  |
| H | 7.90743100  | 1.92606900  | 1.61067800  |
| C | 0.42937500  | -1.97943000 | 2.40725900  |
| H | 0.55424700  | -2.79930800 | 1.69154900  |
| H | -0.07118300 | -1.13809100 | 1.77836400  |
| C | -0.55689800 | -2.33598300 | 3.51165900  |
| H | -1.47536900 | -2.74060100 | 3.07921100  |
| H | -0.83455900 | -1.46114000 | 4.10813600  |
| H | -0.13151000 | -3.08834400 | 4.18807700  |
| C | 8.91647000  | 0.36603300  | 2.70301400  |
| H | 9.85947300  | 0.91843500  | 2.78061600  |
| H | 8.98415900  | -0.31038100 | 1.84624900  |
| H | 8.79430500  | -0.23281400 | 3.61283000  |
| C | -2.24135600 | 3.23566800  | -0.61194700 |
| C | -2.87654500 | 4.57650900  | -0.74902400 |
| C | -3.73354400 | 4.85204100  | -1.82026400 |
| C | -2.67070600 | 5.59410400  | 0.18766600  |
| C | -4.35457100 | 6.09132200  | -1.96258400 |
| C | -3.27477000 | 6.84266000  | 0.06184900  |
| C | -4.12125500 | 7.08935000  | -1.01789700 |
| F | -1.86967500 | 5.38088900  | 1.24090600  |
| F | -3.05678100 | 7.79840800  | 0.97122700  |
| F | -4.70863400 | 8.28049000  | -1.14598300 |
| F | -5.16746800 | 6.32947800  | -2.99598800 |
| F | -3.97889900 | 3.91027100  | -2.73634700 |
| C | 4.00114700  | -0.83475600 | 2.06581100  |
| C | 3.13069000  | 0.07227500  | 4.13564400  |
| H | 3.26419300  | 0.69192500  | 5.01868500  |
| H | 2.68061600  | -2.14093700 | 0.98458600  |
| N | 5.02226100  | -0.89394000 | 1.13633800  |
| O | 6.94105400  | -0.13398000 | 0.17987000  |
| C | 0.82589700  | -4.35968800 | -1.66823900 |
| C | 1.75691100  | -5.02837300 | -0.86886200 |
| C | 0.36302700  | -5.02178100 | -2.80902500 |

|   |             |             |             |
|---|-------------|-------------|-------------|
| C | 2.22908800  | -6.29776400 | -1.18921900 |
| C | 0.81604600  | -6.29570400 | -3.14877000 |
| C | 1.75351900  | -6.93215200 | -2.33664000 |
| F | 2.21653900  | -4.44426600 | 0.25271200  |
| F | -0.53955800 | -4.43448300 | -3.59966500 |
| F | 3.12044200  | -6.91232100 | -0.40571700 |
| F | 2.19408600  | -8.15016000 | -2.65450600 |
| F | 0.36139800  | -6.90811400 | -4.24512600 |

**<sup>3</sup>TS9-s**

|    |             |             |             |
|----|-------------|-------------|-------------|
| N  | 0.12838000  | 1.97187500  | -0.67641000 |
| N  | -0.94837200 | -0.63934100 | -1.00712800 |
| N  | 1.58224000  | -1.74944300 | -0.37769800 |
| N  | 2.68357500  | 0.85540700  | -0.13769700 |
| C  | 0.85348900  | 3.13326200  | -0.74370800 |
| C  | -0.05401900 | 4.25199200  | -0.85847400 |
| C  | -1.31577800 | 3.75136700  | -0.79666500 |
| C  | -1.19758000 | 2.31356500  | -0.71354700 |
| C  | -2.27595300 | 1.43110000  | -0.83095500 |
| C  | -2.12506400 | 0.06110900  | -1.08164200 |
| C  | -3.17060500 | -0.81538600 | -1.55763500 |
| C  | -2.60022100 | -2.03047100 | -1.78572400 |
| C  | -1.21402400 | -1.92809200 | -1.39891100 |
| C  | -0.32934300 | -3.00426400 | -1.30141300 |
| C  | 0.95964400  | -2.90800900 | -0.77036700 |
| C  | 1.80411200  | -4.03163200 | -0.45303300 |
| C  | 2.92142300  | -3.53681000 | 0.14829600  |
| C  | 2.79067200  | -2.10129400 | 0.17176700  |
| C  | 3.79814100  | -1.21880300 | 0.57664100  |
| C  | 3.75054300  | 0.16207300  | 0.37154200  |
| C  | 4.85410900  | 1.07144500  | 0.57801000  |
| C  | 4.44591300  | 2.29542700  | 0.15179100  |
| C  | 3.06968900  | 2.16148800  | -0.26945400 |
| H  | 0.24193900  | 5.28569800  | -0.95734400 |
| H  | -2.24882000 | 4.29260400  | -0.85546000 |
| H  | -4.19321000 | -0.52426100 | -1.74473700 |
| H  | -3.07358700 | -2.92192000 | -2.17143900 |
| H  | 1.56072800  | -5.06524600 | -0.65212400 |
| H  | 3.77742500  | -4.08703700 | 0.51107800  |
| H  | 5.81833400  | 0.79924600  | 0.98124400  |
| H  | 5.00534000  | 3.21952100  | 0.15560500  |
| Mn | 0.85647300  | 0.10346800  | -0.51013500 |
| Cl | 1.38349000  | 0.16280800  | -2.78452700 |
| O  | 0.49661700  | 0.18275000  | 1.16700600  |

|   |             |             |             |
|---|-------------|-------------|-------------|
| C | -3.64686800 | 2.00153500  | -0.70751100 |
| C | -4.06604700 | 2.52459300  | 0.52200100  |
| C | -4.55894100 | 2.05472700  | -1.76581500 |
| C | -5.33319300 | 3.07252700  | 0.69283500  |
| C | -5.84533300 | 2.56374500  | -1.60755200 |
| C | -6.22972500 | 3.07720800  | -0.37205800 |
| C | 5.02903500  | -1.80871000 | 1.17504500  |
| C | 5.00864700  | -2.36420300 | 2.45769700  |
| C | 6.23938600  | -1.85394900 | 0.47581800  |
| C | 6.14001000  | -2.94084400 | 3.02955700  |
| C | 7.38683000  | -2.41795200 | 1.02954300  |
| C | 7.33405700  | -2.96516400 | 2.31064800  |
| F | -4.20918700 | 1.59036000  | -2.97464600 |
| F | -6.69977200 | 2.57687200  | -2.63245800 |
| F | -7.46241300 | 3.55968900  | -0.19994100 |
| F | -5.70627500 | 3.56243200  | 1.88123700  |
| F | -3.24114100 | 2.49903100  | 1.57706700  |
| F | 6.31624300  | -1.34134400 | -0.75783000 |
| F | 3.87462700  | -2.35200700 | 3.17406300  |
| F | 6.08969500  | -3.46323200 | 4.25887900  |
| F | 8.42576500  | -3.51111700 | 2.84877500  |
| F | 8.53115500  | -2.44521700 | 0.34022500  |
| C | -6.41899300 | 0.61923100  | 2.39831600  |
| C | -5.44157700 | 0.66891200  | 3.34614000  |
| C | -4.19077600 | -0.02457700 | 3.21098700  |
| C | -6.19052900 | -0.14322300 | 1.15801700  |
| H | -5.59461700 | 1.27359800  | 4.23805800  |
| C | -1.92928100 | -0.57889900 | 3.91773500  |
| H | -4.86721700 | -1.41443500 | 0.28130200  |
| C | -1.74567300 | -1.38497800 | 2.76933000  |
| C | -2.80272000 | -1.52210500 | 1.86646700  |
| H | -1.11795300 | -0.45783400 | 4.62703300  |
| C | -7.73660400 | 1.33743000  | 2.51802200  |
| H | -7.68831800 | 2.04155300  | 3.35631200  |
| H | -7.90743100 | 1.92606900  | 1.61067800  |
| C | -0.42937500 | -1.97943000 | 2.40725900  |
| H | -0.55424700 | -2.79930800 | 1.69154900  |
| H | 0.07118300  | -1.13809100 | 1.77836400  |
| C | 0.55689800  | -2.33598300 | 3.51165900  |
| H | 1.47536900  | -2.74060100 | 3.07921100  |
| H | 0.83455900  | -1.46114000 | 4.10813600  |
| H | 0.13151000  | -3.08834400 | 4.18807700  |
| C | -8.91647000 | 0.36603300  | 2.70301400  |
| H | -9.85947300 | 0.91843500  | 2.78061600  |

|   |             |             |             |
|---|-------------|-------------|-------------|
| H | -8.98415900 | -0.31038100 | 1.84624900  |
| H | -8.79430500 | -0.23281400 | 3.61283000  |
| C | 2.24135600  | 3.23566800  | -0.61194700 |
| C | 2.87654500  | 4.57650900  | -0.74902400 |
| C | 3.73354400  | 4.85204100  | -1.82026400 |
| C | 2.67070600  | 5.59410400  | 0.18766600  |
| C | 4.35457100  | 6.09132200  | -1.96258400 |
| C | 3.27477000  | 6.84266000  | 0.06184900  |
| C | 4.12125500  | 7.08935000  | -1.01789700 |
| F | 1.86967500  | 5.38088900  | 1.24090600  |
| F | 3.05678100  | 7.79840800  | 0.97122700  |
| F | 4.70863400  | 8.28049000  | -1.14598300 |
| F | 5.16746800  | 6.32947800  | -2.99598800 |
| F | 3.97889900  | 3.91027100  | -2.73634700 |
| C | -4.00114700 | -0.83475600 | 2.06581100  |
| C | -3.13069000 | 0.07227500  | 4.13564400  |
| H | -3.26419300 | 0.69192500  | 5.01868500  |
| H | -2.68061600 | -2.14093700 | 0.98458600  |
| N | -5.02226100 | -0.89394000 | 1.13633800  |
| O | -6.94105400 | -0.13398000 | 0.17987000  |
| C | -0.82589700 | -4.35968800 | -1.66823900 |
| C | -1.75691100 | -5.02837300 | -0.86886200 |
| C | -0.36302700 | -5.02178100 | -2.80902500 |
| C | -2.22908800 | -6.29776400 | -1.18921900 |
| C | -0.81604600 | -6.29570400 | -3.14877000 |
| C | -1.75351900 | -6.93215200 | -2.33664000 |
| F | -2.21653900 | -4.44426600 | 0.25271200  |
| F | 0.53955800  | -4.43448300 | -3.59966500 |
| F | -3.12044200 | -6.91232100 | -0.40571700 |
| F | -2.19408600 | -8.15016000 | -2.65450600 |
| F | -0.36139800 | -6.90811400 | -4.24512600 |

**<sup>5</sup>TS9-R**

|   |             |             |             |
|---|-------------|-------------|-------------|
| N | 0.47977400  | -1.88210500 | 0.43094200  |
| N | 2.80065200  | -0.22928500 | 0.25281800  |
| N | 1.09871300  | 2.05903100  | 0.23000600  |
| N | -1.16392300 | 0.40614200  | 0.56332200  |
| C | -0.65168200 | -2.50576600 | 0.89992000  |
| C | -0.43345000 | -3.92877300 | 0.92976100  |
| C | 0.82088700  | -4.15150800 | 0.44591900  |
| C | 1.40563000  | -2.86066200 | 0.18004500  |
| C | 2.76298400  | -2.66176400 | -0.11177600 |
| C | 3.40965000  | -1.42656900 | -0.01621200 |
| C | 4.84024900  | -1.22425800 | -0.09882700 |

|    |             |             |             |
|----|-------------|-------------|-------------|
| C  | 5.07179200  | 0.08854400  | 0.15862000  |
| C  | 3.78048400  | 0.71903800  | 0.32970400  |
| C  | 3.56745600  | 2.10081100  | 0.39827500  |
| C  | 2.31270400  | 2.70442500  | 0.27925500  |
| C  | 2.10418400  | 4.11668200  | 0.08044600  |
| C  | 0.77136900  | 4.30475200  | -0.12273100 |
| C  | 0.13485400  | 3.01954300  | 0.00378700  |
| C  | -1.24406900 | 2.80503300  | 0.01423600  |
| C  | -1.83417600 | 1.57696400  | 0.33830700  |
| C  | -3.24026200 | 1.38973200  | 0.61996900  |
| C  | -3.39207500 | 0.11379900  | 1.06143100  |
| C  | -2.08888500 | -0.50816600 | 1.00055200  |
| H  | -1.14864000 | -4.66371100 | 1.26761500  |
| H  | 1.32817800  | -5.09898400 | 0.33624500  |
| H  | 5.56950000  | -1.99384400 | -0.30307100 |
| H  | 6.02414300  | 0.59587800  | 0.19766600  |
| H  | 2.88617300  | 4.86192000  | 0.06891300  |
| H  | 0.25894200  | 5.23514600  | -0.31825700 |
| H  | -4.00500300 | 2.14452400  | 0.51396200  |
| H  | -4.31066200 | -0.38309400 | 1.33931400  |
| Mn | 0.81666200  | 0.10648000  | 0.36131800  |
| Cl | 1.01294500  | 0.10695400  | 2.68248700  |
| O  | 0.77231400  | 0.15042300  | -1.39908000 |
| C  | 3.56441500  | -3.86816500 | -0.45928500 |
| C  | 3.32701900  | -4.55802400 | -1.65269900 |
| C  | 4.55085800  | -4.38237800 | 0.38884100  |
| C  | 4.04199300  | -5.70013100 | -2.00249500 |
| C  | 5.28463500  | -5.51992000 | 0.05860800  |
| C  | 5.02675900  | -6.18127900 | -1.14106000 |
| C  | -2.16236400 | 3.95531100  | -0.21906300 |
| C  | -3.00693800 | 3.97922100  | -1.33239500 |
| C  | -2.28084900 | 5.01303600  | 0.68895500  |
| C  | -3.94502500 | 4.98636600  | -1.53389800 |
| C  | -3.19543600 | 6.04749800  | 0.49788900  |
| C  | -4.03549000 | 6.03017900  | -0.61507200 |
| F  | 4.81320700  | -3.77748900 | 1.55359100  |
| F  | 6.22356800  | -5.98597800 | 0.88723600  |
| F  | 5.72100800  | -7.27335800 | -1.46451000 |
| F  | 3.79287000  | -6.33318600 | -3.15294400 |
| F  | 2.38127800  | -4.12240000 | -2.50148500 |
| F  | -1.50829700 | 5.04665100  | 1.78086100  |
| F  | -2.94056500 | 2.99480600  | -2.24002900 |
| F  | -4.75255300 | 4.95241300  | -2.60135300 |
| F  | -4.92269700 | 7.00921100  | -0.79852300 |

|   |             |             |             |
|---|-------------|-------------|-------------|
| F | -3.28403500 | 7.04575100  | 1.38169000  |
| C | -5.89502400 | 0.32827800  | -1.73248700 |
| C | -4.97484400 | 0.78409700  | -2.62973400 |
| C | -3.75778300 | 0.07955800  | -2.91367000 |
| C | -5.66689100 | -0.95183600 | -1.03977000 |
| H | -5.12821000 | 1.74770800  | -3.11148300 |
| C | -1.53105300 | -0.07424000 | -3.87238500 |
| H | -4.37405400 | -2.51946400 | -0.95739600 |
| C | -1.27628100 | -1.26251500 | -3.13980800 |
| C | -2.30194700 | -1.80879400 | -2.36334100 |
| H | -0.74645100 | 0.35785300  | -4.48280400 |
| C | -7.15025500 | 1.07569400  | -1.37290000 |
| H | -7.08088100 | 2.10409200  | -1.74808400 |
| H | -7.22488600 | 1.12463700  | -0.27931100 |
| C | 0.09399200  | -1.80863100 | -3.00810400 |
| H | 0.09938600  | -2.81122500 | -2.56852500 |
| H | 0.52052600  | -1.10977200 | -2.16028000 |
| C | 1.06842400  | -1.68724700 | -4.17306000 |
| H | 2.03327800  | -2.11681800 | -3.89201800 |
| H | 1.23646300  | -0.64381500 | -4.45648600 |
| H | 0.69789900  | -2.22683300 | -5.05426500 |
| C | -8.42018900 | 0.39690800  | -1.91966000 |
| H | -9.31334500 | 0.96103800  | -1.62909800 |
| H | -8.50530000 | -0.61621000 | -1.51715200 |
| H | -8.39216600 | 0.33846000  | -3.01365000 |
| C | -1.85107800 | -1.86412300 | 1.23627100  |
| C | -2.95508400 | -2.64397700 | 1.86361000  |
| C | -3.38014300 | -2.33073100 | 3.16232700  |
| C | -3.64737800 | -3.66578600 | 1.21277800  |
| C | -4.44362300 | -2.99521700 | 3.76974400  |
| C | -4.71700100 | -4.34068700 | 1.78897500  |
| C | -5.11355300 | -4.00513100 | 3.08153500  |
| F | -3.31663900 | -4.00306300 | -0.05900300 |
| F | -5.35980100 | -5.29560700 | 1.11253200  |
| F | -6.13166800 | -4.64508300 | 3.65571700  |
| F | -4.82200000 | -2.67313400 | 5.00873600  |
| F | -2.76976900 | -1.36098900 | 3.84774900  |
| C | -3.52732700 | -1.14913300 | -2.24619500 |
| C | -2.74406700 | 0.57358900  | -3.76263600 |
| H | -2.91440500 | 1.50835700  | -4.28782300 |
| H | -2.12207600 | -2.70980200 | -1.78554800 |
| N | -4.52555000 | -1.63646300 | -1.42746000 |
| O | -6.39483100 | -1.41192600 | -0.15558200 |
| C | 4.75140700  | 3.00037600  | 0.50449500  |

|   |            |            |             |
|---|------------|------------|-------------|
| C | 4.98655400 | 3.73404500 | 1.67222200  |
| C | 5.65012700 | 3.16959300 | -0.55299600 |
| C | 6.07643900 | 4.59428800 | 1.79091300  |
| C | 6.75020800 | 4.01804100 | -0.45472000 |
| C | 6.96115500 | 4.73359600 | 0.72285200  |
| F | 4.14928700 | 3.62370400 | 2.70827100  |
| F | 6.27955600 | 5.28282500 | 2.91798400  |
| F | 8.00947100 | 5.55264100 | 0.82657200  |
| F | 7.59596300 | 4.15718800 | -1.48121600 |
| F | 5.46575200 | 2.50099000 | -1.70002900 |

**<sup>5</sup>TS9-S**

|    |             |             |             |
|----|-------------|-------------|-------------|
| N  | -0.47977400 | -1.88210500 | 0.43094200  |
| N  | -2.80065200 | -0.22928500 | 0.25281800  |
| N  | -1.09871300 | 2.05903100  | 0.23000600  |
| N  | 1.16392300  | 0.40614200  | 0.56332200  |
| C  | 0.65168200  | -2.50576600 | 0.89992000  |
| C  | 0.43345000  | -3.92877300 | 0.92976100  |
| C  | -0.82088700 | -4.15150800 | 0.44591900  |
| C  | -1.40563000 | -2.86066200 | 0.18004500  |
| C  | -2.76298400 | -2.66176400 | -0.11177600 |
| C  | -3.40965000 | -1.42656900 | -0.01621200 |
| C  | -4.84024900 | -1.22425800 | -0.09882700 |
| C  | -5.07179200 | 0.08854400  | 0.15862000  |
| C  | -3.78048400 | 0.71903800  | 0.32970400  |
| C  | -3.56745600 | 2.10081100  | 0.39827500  |
| C  | -2.31270400 | 2.70442500  | 0.27925500  |
| C  | -2.10418400 | 4.11668200  | 0.08044600  |
| C  | -0.77136900 | 4.30475200  | -0.12273100 |
| C  | -0.13485400 | 3.01954300  | 0.00378700  |
| C  | 1.24406900  | 2.80503300  | 0.01423600  |
| C  | 1.83417600  | 1.57696400  | 0.33830700  |
| C  | 3.24026200  | 1.38973200  | 0.61996900  |
| C  | 3.39207500  | 0.11379900  | 1.06143100  |
| C  | 2.08888500  | -0.50816600 | 1.00055200  |
| H  | 1.14864000  | -4.66371100 | 1.26761500  |
| H  | -1.32817800 | -5.09898400 | 0.33624500  |
| H  | -5.56950000 | -1.99384400 | -0.30307100 |
| H  | -6.02414300 | 0.59587800  | 0.19766600  |
| H  | -2.88617300 | 4.86192000  | 0.06891300  |
| H  | -0.25894200 | 5.23514600  | -0.31825700 |
| H  | 4.00500300  | 2.14452400  | 0.51396200  |
| H  | 4.31066200  | -0.38309400 | 1.33931400  |
| Mn | -0.81666200 | 0.10648000  | 0.36131800  |

|    |             |             |             |
|----|-------------|-------------|-------------|
| C1 | -1.01294500 | 0.10695400  | 2.68248700  |
| O  | -0.77231400 | 0.15042300  | -1.39908000 |
| C  | -3.56441500 | -3.86816500 | -0.45928500 |
| C  | -3.32701900 | -4.55802400 | -1.65269900 |
| C  | -4.55085800 | -4.38237800 | 0.38884100  |
| C  | -4.04199300 | -5.70013100 | -2.00249500 |
| C  | -5.28463500 | -5.51992000 | 0.05860800  |
| C  | -5.02675900 | -6.18127900 | -1.14106000 |
| C  | 2.16236400  | 3.95531100  | -0.21906300 |
| C  | 3.00693800  | 3.97922100  | -1.33239500 |
| C  | 2.28084900  | 5.01303600  | 0.68895500  |
| C  | 3.94502500  | 4.98636600  | -1.53389800 |
| C  | 3.19543600  | 6.04749800  | 0.49788900  |
| C  | 4.03549000  | 6.03017900  | -0.61507200 |
| F  | -4.81320700 | -3.77748900 | 1.55359100  |
| F  | -6.22356800 | -5.98597800 | 0.88723600  |
| F  | -5.72100800 | -7.27335800 | -1.46451000 |
| F  | -3.79287000 | -6.33318600 | -3.15294400 |
| F  | -2.38127800 | -4.12240000 | -2.50148500 |
| F  | 1.50829700  | 5.04665100  | 1.78086100  |
| F  | 2.94056500  | 2.99480600  | -2.24002900 |
| F  | 4.75255300  | 4.95241300  | -2.60135300 |
| F  | 4.92269700  | 7.00921100  | -0.79852300 |
| F  | 3.28403500  | 7.04575100  | 1.38169000  |
| C  | 5.89502400  | 0.32827800  | -1.73248700 |
| C  | 4.97484400  | 0.78409700  | -2.62973400 |
| C  | 3.75778300  | 0.07955800  | -2.91367000 |
| C  | 5.66689100  | -0.95183600 | -1.03977000 |
| H  | 5.12821000  | 1.74770800  | -3.11148300 |
| C  | 1.53105300  | -0.07424000 | -3.87238500 |
| H  | 4.37405400  | -2.51946400 | -0.95739600 |
| C  | 1.27628100  | -1.26251500 | -3.13980800 |
| C  | 2.30194700  | -1.80879400 | -2.36334100 |
| H  | 0.74645100  | 0.35785300  | -4.48280400 |
| C  | 7.15025500  | 1.07569400  | -1.37290000 |
| H  | 7.08088100  | 2.10409200  | -1.74808400 |
| H  | 7.22488600  | 1.12463700  | -0.27931100 |
| C  | -0.09399200 | -1.80863100 | -3.00810400 |
| H  | -0.09938600 | -2.81122500 | -2.56852500 |
| H  | -0.52052600 | -1.10977200 | -2.16028000 |
| C  | -1.06842400 | -1.68724700 | -4.17306000 |
| H  | -2.03327800 | -2.11681800 | -3.89201800 |
| H  | -1.23646300 | -0.64381500 | -4.45648600 |
| H  | -0.69789900 | -2.22683300 | -5.05426500 |



|   |             |             |             |
|---|-------------|-------------|-------------|
| C | 8.42018900  | 0.39690800  | -1.91966000 |
| H | 9.31334500  | 0.96103800  | -1.62909800 |
| H | 8.50530000  | -0.61621000 | -1.51715200 |
| H | 8.39216600  | 0.33846000  | -3.01365000 |
| C | 1.85107800  | -1.86412300 | 1.23627100  |
| C | 2.95508400  | -2.64397700 | 1.86361000  |
| C | 3.38014300  | -2.33073100 | 3.16232700  |
| C | 3.64737800  | -3.66578600 | 1.21277800  |
| C | 4.44362300  | -2.99521700 | 3.76974400  |
| C | 4.71700100  | -4.34068700 | 1.78897500  |
| C | 5.11355300  | -4.00513100 | 3.08153500  |
| F | 3.31663900  | -4.00306300 | -0.05900300 |
| F | 5.35980100  | -5.29560700 | 1.11253200  |
| F | 6.13166800  | -4.64508300 | 3.65571700  |
| F | 4.82200000  | -2.67313400 | 5.00873600  |
| F | 2.76976900  | -1.36098900 | 3.84774900  |
| C | 3.52732700  | -1.14913300 | -2.24619500 |
| C | 2.74406700  | 0.57358900  | -3.76263600 |
| H | 2.91440500  | 1.50835700  | -4.28782300 |
| H | 2.12207600  | -2.70980200 | -1.78554800 |
| N | 4.52555000  | -1.63646300 | -1.42746000 |
| O | 6.39483100  | -1.41192600 | -0.15558200 |
| C | -4.75140700 | 3.00037600  | 0.50449500  |
| C | -4.98655400 | 3.73404500  | 1.67222200  |
| C | -5.65012700 | 3.16959300  | -0.55299600 |
| C | -6.07643900 | 4.59428800  | 1.79091300  |
| C | -6.75020800 | 4.01804100  | -0.45472000 |
| C | -6.96115500 | 4.73359600  | 0.72285200  |
| F | -4.14928700 | 3.62370400  | 2.70827100  |
| F | -6.27955600 | 5.28282500  | 2.91798400  |
| F | -8.00947100 | 5.55264100  | 0.82657200  |
| F | -7.59596300 | 4.15718800  | -1.48121600 |
| F | -5.46575200 | 2.50099000  | -1.70002900 |

**(U)B3LYP-D3/def2-TZVPP-SMD(Dichloromethane)//B3LYP-D3/6-31G(d,p)-LANL2DZ**

**PhIO**

|   |             |             |             |
|---|-------------|-------------|-------------|
| O | -1.75350300 | 1.60836900  | 0.00000200  |
| I | -1.41343800 | -0.27155500 | 0.00010100  |
| C | 0.76438200  | -0.15417000 | -0.00003300 |
| C | 1.24499900  | 1.14382100  | -0.00019600 |
| C | 1.57892500  | -1.27834700 | 0.00003800  |
| C | 2.63077900  | 1.32492900  | -0.00029300 |
| H | 0.53654000  | 1.97215800  | -0.00024800 |
| C | 2.96316800  | -1.07651200 | -0.00005400 |

|   |            |             |             |
|---|------------|-------------|-------------|
| H | 1.16664600 | -2.28324400 | 0.00015600  |
| C | 3.48549400 | 0.21936300  | -0.00022100 |
| H | 3.04065900 | 2.33079100  | -0.00042900 |
| H | 3.62854900 | -1.93499200 | -0.00000100 |
| H | 4.56135100 | 0.36623800  | -0.00028500 |

**PhI**

|   |             |             |             |
|---|-------------|-------------|-------------|
| C | 0.58219200  | -0.00001800 | 0.00000200  |
| C | 1.26536100  | 1.21608700  | 0.00000000  |
| C | 2.66286600  | 1.20738800  | 0.00000200  |
| C | 3.36346000  | 0.00000600  | -0.00000200 |
| C | 2.66290000  | -1.20737200 | -0.00000100 |
| C | 1.26537100  | -1.21608800 | 0.00000300  |
| H | 0.72349600  | 2.15553800  | 0.00000500  |
| H | 3.19999000  | 2.15209500  | -0.00000200 |
| H | 4.44969700  | 0.00003200  | -0.00000100 |
| H | 3.20000600  | -2.15208900 | -0.00000600 |
| H | 0.72355100  | -2.15556600 | 0.00000600  |
| I | -1.56810600 | 0.00000000  | 0.00000000  |

**Sub**

|   |             |             |             |
|---|-------------|-------------|-------------|
| C | -2.72290900 | -0.12919200 | -0.33217300 |
| C | -1.77478800 | 0.88860200  | -0.27288000 |
| C | -0.40839400 | 0.58699200  | -0.16525600 |
| C | 0.02905900  | -0.75754400 | -0.11513600 |
| C | -0.94209900 | -1.77461900 | -0.17677100 |
| C | -2.28927100 | -1.47035400 | -0.28282300 |
| H | -2.09029800 | 1.92900200  | -0.31107600 |
| C | 1.44245800  | -1.01284800 | -0.00763100 |
| H | -0.61536300 | -2.81077000 | -0.14352300 |
| H | -3.02456000 | -2.26884300 | -0.33151900 |
| C | 2.36582300  | -0.01704300 | 0.04847400  |
| C | 1.92719600  | 1.38949600  | -0.00217200 |
| H | 1.75912100  | -2.05190300 | 0.02882000  |
| C | -4.19937700 | 0.19279200  | -0.39262300 |
| H | -4.34544100 | 1.18113900  | -0.84362200 |
| H | -4.70383500 | -0.52815900 | -1.04727700 |
| O | 2.68701100  | 2.35481600  | 0.04245000  |
| C | 3.85549100  | -0.21194300 | 0.16196400  |
| H | 4.32767300  | 0.31367700  | -0.67822900 |
| H | 4.19907700  | 0.33721800  | 1.04826000  |
| C | 4.33251100  | -1.66305400 | 0.21727500  |
| H | 3.91503600  | -2.19193700 | 1.08122800  |
| H | 4.04728600  | -2.21588500 | -0.68463100 |

|   |             |             |             |
|---|-------------|-------------|-------------|
| H | 5.42249200  | -1.70236000 | 0.29940000  |
| C | -4.85697800 | 0.16223100  | 0.99927900  |
| H | -4.39059900 | 0.89584200  | 1.66467900  |
| H | -5.92626600 | 0.38845100  | 0.93431300  |
| H | -4.74351300 | -0.82363400 | 1.46158700  |
| N | 0.55039700  | 1.57959400  | -0.10767700 |
| H | 0.26800600  | 2.55137500  | -0.14142800 |

**<sup>3</sup>Cat1**

|    |             |             |             |
|----|-------------|-------------|-------------|
| C  | 1.73706700  | -2.17775100 | -0.22863100 |
| C  | 3.15579100  | -2.40605100 | -0.31617200 |
| C  | 3.75440000  | -1.18730000 | -0.39492300 |
| C  | 2.69953000  | -0.21096700 | -0.34091900 |
| N  | 1.46822500  | -0.82143700 | -0.22840700 |
| H  | 3.63655400  | -3.37267800 | -0.31518500 |
| H  | 4.81104700  | -0.97926800 | -0.48250600 |
| C  | -0.06925300 | 3.09002100  | -0.13966300 |
| C  | 0.91012300  | 4.14281600  | -0.20733000 |
| C  | 2.12745100  | 3.54458200  | -0.30548600 |
| C  | 1.89519600  | 2.12711000  | -0.29526400 |
| N  | 0.55024100  | 1.85501900  | -0.18229300 |
| H  | 0.69207100  | 5.19969500  | -0.17294700 |
| H  | 3.10188300  | 4.00417600  | -0.37556500 |
| C  | -2.55741700 | -2.01340400 | 0.09218800  |
| C  | -2.78675400 | -3.43494400 | 0.06831600  |
| C  | -1.56948700 | -4.03017400 | -0.02596700 |
| C  | -0.58879700 | -2.97632600 | -0.06110200 |
| N  | -1.20564000 | -1.74357500 | 0.01410900  |
| H  | -3.75458900 | -3.91163200 | 0.10642100  |
| H  | -1.35197700 | -5.08625900 | -0.07872700 |
| C  | -3.35265300 | 0.31653500  | 0.17101500  |
| C  | -4.40088300 | 1.29911000  | 0.26547000  |
| C  | -3.80719900 | 2.51873000  | 0.19254900  |
| C  | -2.39134700 | 2.28919100  | 0.06679500  |
| N  | -2.12307100 | 0.93456500  | 0.06522100  |
| H  | -5.45230900 | 1.08134900  | 0.37691900  |
| H  | -4.28283200 | 3.48742400  | 0.21927000  |
| C  | 0.78511400  | -3.19478800 | -0.16196900 |
| C  | -1.44275400 | 3.30697800  | -0.03155700 |
| C  | 2.92323600  | 1.17326000  | -0.37258500 |
| C  | -3.57298400 | -1.06132800 | 0.17677700  |
| Mn | -0.35126400 | 0.05198200  | -0.35639600 |
| Cl | -0.55165100 | 0.01841000  | -2.54197700 |
| C  | -1.92572600 | 4.71811300  | -0.01680100 |

|   |             |             |             |
|---|-------------|-------------|-------------|
| C | -2.44083700 | 5.29858000  | 1.14572300  |
| C | -1.87711400 | 5.51373700  | -1.16557900 |
| C | -2.89643000 | 6.61452400  | 1.17138600  |
| F | -2.51239600 | 4.57989300  | 2.27458200  |
| C | -2.32042100 | 6.83468700  | -1.16257300 |
| F | -1.38730900 | 5.01136600  | -2.30451600 |
| C | -2.83324400 | 7.38448200  | 0.01115800  |
| F | -3.38619900 | 7.14355800  | 2.29779800  |
| F | -2.26118300 | 7.57456600  | -2.27435900 |
| F | -3.26313000 | 8.64801100  | 0.02455700  |
| C | -4.97993300 | -1.54547200 | 0.27429300  |
| C | -5.44936900 | -2.18724500 | 1.42426400  |
| C | -5.88188300 | -1.37753300 | -0.78112500 |
| C | -6.75945700 | -2.64912400 | 1.52616700  |
| F | -4.62654000 | -2.37820300 | 2.46417500  |
| C | -7.19896000 | -1.82447300 | -0.69966200 |
| F | -5.48796600 | -0.76583400 | -1.90411600 |
| C | -7.63670100 | -2.46415000 | 0.45884900  |
| F | -7.18088900 | -3.26097700 | 2.63796200  |
| F | -8.04126800 | -1.64917000 | -1.72282400 |
| F | -8.89541700 | -2.89907800 | 0.54645000  |
| C | 1.26713100  | -4.60539300 | -0.20719200 |
| C | 1.80291600  | -5.15302600 | -1.37691600 |
| C | 1.20168300  | -5.43136500 | 0.91849900  |
| C | 2.25959700  | -6.46831700 | -1.42866400 |
| F | 1.89196100  | -4.40596900 | -2.48278700 |
| C | 1.64623600  | -6.75088900 | 0.88926600  |
| F | 0.69335000  | -4.95742600 | 2.06450600  |
| C | 2.17859900  | -7.26871300 | -0.29031600 |
| F | 2.76773300  | -6.96791900 | -2.55936700 |
| F | 1.57045400  | -7.51915900 | 1.98133300  |
| F | 2.60988200  | -8.53111700 | -0.32963500 |
| C | 4.26519200  | 1.64706100  | -0.44768700 |
| C | 5.40170500  | 2.07294500  | -0.45055400 |
| C | 6.74342900  | 2.63596500  | -0.43940600 |
| H | 6.79866700  | 3.38463300  | -1.24095100 |
| C | 7.23693400  | 3.26668300  | 0.90464000  |
| H | 6.58507100  | 4.03512900  | 1.32764900  |
| C | 7.95641600  | 1.66060300  | -0.54167100 |
| H | 7.94145800  | 0.96606500  | -1.38286000 |
| C | 9.12228400  | 2.67554200  | -0.53631300 |
| H | 10.06261700 | 2.21121800  | -0.22577000 |
| H | 9.27822300  | 3.09100500  | -1.53655100 |
| C | 8.63072500  | 3.77756200  | 0.46517000  |

|   |            |             |             |
|---|------------|-------------|-------------|
| H | 9.30379400 | 3.90322400  | 1.31859300  |
| H | 8.54580200 | 4.75064500  | -0.02787500 |
| C | 7.45711800 | 2.04278400  | 1.82751300  |
| H | 8.20303100 | 2.28142100  | 2.58964500  |
| C | 7.95314000 | 0.95183800  | 0.83164100  |
| H | 8.94418200 | 0.54937300  | 1.06187600  |
| C | 6.19048400 | 1.44316300  | 2.50835400  |
| H | 5.29291200 | 2.02431900  | 2.26793100  |
| H | 6.29559800 | 1.41586800  | 3.59863200  |
| C | 6.94519200 | -0.18794100 | 0.93542000  |
| O | 6.90896200 | -1.18009500 | 0.21882300  |
| N | 6.09551700 | 0.09468900  | 1.96416400  |
| H | 5.27760200 | -0.48472600 | 2.09497400  |

<sup>3</sup>Cat2

|   |             |             |             |
|---|-------------|-------------|-------------|
| N | -2.13034700 | 0.18265000  | 0.30391500  |
| N | -0.30493200 | -1.89341800 | 0.90424500  |
| N | 1.81391800  | -0.02277000 | 0.91632000  |
| N | -0.01013900 | 2.05233500  | 0.30325600  |
| C | -2.86718000 | 1.29699800  | -0.04075800 |
| C | -4.26970800 | 0.97694800  | -0.08369500 |
| C | -4.38552500 | -0.33770500 | 0.24076800  |
| C | -3.05305300 | -0.83538000 | 0.45968600  |
| C | -2.75474400 | -2.16458900 | 0.75819200  |
| C | -1.45894100 | -2.65311100 | 0.93092000  |
| C | -1.13482500 | -4.04458000 | 1.10157700  |
| C | 0.22348600  | -4.13318500 | 1.13980100  |
| C | 0.72731600  | -2.79453300 | 1.02100200  |
| C | 2.09446000  | -2.47329400 | 1.02323500  |
| C | 2.58423300  | -1.16057200 | 1.02555300  |
| C | 3.97681100  | -0.82709000 | 1.14042800  |
| C | 4.05476100  | 0.52921000  | 1.11845100  |
| C | 2.71427800  | 1.02529100  | 0.94612100  |
| C | 2.39879100  | 2.37005300  | 0.75006400  |
| C | 1.12278200  | 2.83279400  | 0.42774900  |
| C | 0.81447900  | 4.20914000  | 0.13784900  |
| C | -0.50054000 | 4.25921900  | -0.19828800 |
| C | -1.01539900 | 2.91981700  | -0.07876800 |
| H | -5.06160600 | 1.67596000  | -0.30721900 |
| H | -5.29096200 | -0.91875900 | 0.33020000  |
| H | -1.85332900 | -4.84821900 | 1.16288200  |
| H | 0.84153400  | -5.01173500 | 1.25127700  |
| H | 4.77767200  | -1.54699400 | 1.19260800  |
| H | 4.94403300  | 1.13911700  | 1.16240200  |

|    |             |             |             |
|----|-------------|-------------|-------------|
| H  | 1.51592000  | 5.02828300  | 0.18295200  |
| H  | -1.07454600 | 5.12547600  | -0.49011500 |
| Mn | -0.11606100 | 0.03705000  | 0.33712100  |
| Cl | 0.27424500  | -0.38418200 | -1.80935000 |
| C  | -3.88170300 | -3.13519100 | 0.85989800  |
| C  | -4.22724500 | -3.71461900 | 2.08459500  |
| C  | -4.62597400 | -3.51265900 | -0.26218400 |
| C  | -5.26967600 | -4.63169300 | 2.19627600  |
| C  | -5.67702200 | -4.42280800 | -0.17400500 |
| C  | -5.99729800 | -4.98450600 | 1.06088600  |
| C  | 3.50971700  | 3.36053400  | 0.83844700  |
| C  | 4.11831500  | 3.65272800  | 2.06255000  |
| C  | 3.99858700  | 4.01597600  | -0.29577000 |
| C  | 5.16994600  | 4.56036000  | 2.16251700  |
| C  | 5.04475600  | 4.93274900  | -0.21951700 |
| C  | 5.63242100  | 5.20286300  | 1.01524600  |
| F  | -4.33754400 | -2.99145500 | -1.46078100 |
| F  | -6.37353100 | -4.76497900 | -1.26259800 |
| F  | -7.00009900 | -5.85988800 | 1.15613500  |
| F  | -5.57854500 | -5.16999400 | 3.38053000  |
| F  | -3.54288900 | -3.39402200 | 3.19049300  |
| F  | 3.45282300  | 3.77398300  | -1.49345200 |
| F  | 3.69449400  | 3.04580200  | 3.17910000  |
| F  | 5.73318400  | 4.82178900  | 3.34675300  |
| F  | 6.63678000  | 6.07773700  | 1.09940100  |
| F  | 5.49054200  | 5.54902800  | -1.31876700 |
| C  | 3.77316500  | -4.41037800 | 0.50019800  |
| C  | 4.63213300  | -5.37954600 | -0.15400300 |
| H  | 5.01778200  | -6.09760200 | 0.58123400  |
| C  | 3.99954900  | -6.13588700 | -1.37045100 |
| H  | 3.08343700  | -6.68999000 | -1.15090200 |
| C  | 5.79716200  | -4.78391500 | -1.00535600 |
| H  | 6.47338300  | -4.10762100 | -0.47973000 |
| C  | 6.43885200  | -6.08637700 | -1.53739700 |
| H  | 7.02039900  | -5.90903200 | -2.44664600 |
| H  | 7.11755900  | -6.51645300 | -0.79427900 |
| C  | 5.20237200  | -7.01979100 | -1.78245500 |
| H  | 5.12379700  | -7.35306600 | -2.82150000 |
| H  | 5.25406800  | -7.91578200 | -1.15614300 |
| C  | 3.83842900  | -5.03914300 | -2.45588300 |
| H  | 3.88335200  | -5.50077400 | -3.44551900 |
| C  | 5.05790800  | -4.11105000 | -2.18279100 |
| H  | 5.72992300  | -3.99734200 | -3.03929100 |
| N  | 3.13355200  | -2.77877800 | -2.18361500 |

|   |             |             |             |
|---|-------------|-------------|-------------|
| H | 2.53577100  | -1.98172400 | -1.99354100 |
| C | 3.02539800  | -3.54014200 | 0.89413000  |
| C | -2.35360100 | 2.57595400  | -0.26565100 |
| C | -3.30767200 | 3.64048300  | -0.68903700 |
| C | -3.88850700 | 3.62125000  | -1.96117000 |
| C | -3.67136600 | 4.68381600  | 0.16739300  |
| C | -4.79186500 | 4.59977400  | -2.37059400 |
| C | -4.56673500 | 5.67710600  | -0.22192700 |
| C | -5.12943100 | 5.63171500  | -1.49644700 |
| F | -3.14823200 | 4.74886300  | 1.39956300  |
| F | -4.89422800 | 6.66511500  | 0.61752200  |
| F | -5.99148500 | 6.57585500  | -1.87908500 |
| F | -5.33266500 | 4.55782200  | -3.59220300 |
| F | -3.58492400 | 2.63951300  | -2.81755100 |
| C | 4.46319800  | -2.72991700 | -1.88679800 |
| C | 2.58619600  | -4.11384200 | -2.37876600 |
| H | 1.99636200  | -4.16039400 | -3.30053600 |
| H | 1.92648900  | -4.39095500 | -1.54710500 |
| O | 5.09023500  | -1.75873300 | -1.48568100 |

**<sup>3</sup>Cat3**

|   |             |             |             |
|---|-------------|-------------|-------------|
| C | 2.72637300  | 1.35797400  | -0.03705200 |
| C | 4.13513300  | 1.07034000  | 0.04647000  |
| C | 4.26327400  | -0.28161900 | 0.04640600  |
| C | 2.93361800  | -0.82852300 | -0.03765200 |
| N | 1.99921000  | 0.18596400  | -0.09165700 |
| H | 4.92002300  | 1.80870300  | 0.10966000  |
| H | 5.17284100  | -0.85950400 | 0.10968200  |
| C | -0.82241300 | -2.92946800 | -0.14719700 |
| C | -0.27677000 | -4.26239100 | -0.13563400 |
| C | 1.07515700  | -4.13607100 | -0.11711800 |
| C | 1.36413900  | -2.72527300 | -0.10165100 |
| N | 0.19333500  | -1.99476800 | -0.13418100 |
| H | -0.85502800 | -5.17381100 | -0.14056700 |
| H | 1.81275600  | -4.92421200 | -0.11797400 |
| C | -1.35658400 | 2.72655500  | -0.14303200 |
| C | -1.06681600 | 4.13724600  | -0.12894700 |
| C | 0.28517800  | 4.26279700  | -0.11065600 |
| C | 0.83005800  | 2.92963800  | -0.09744700 |
| N | -0.18570100 | 1.99546300  | -0.13102300 |
| H | -1.80365800 | 4.92602100  | -0.13202400 |
| H | 0.86436500  | 5.17369600  | -0.11023300 |
| C | -2.92523300 | 0.82947900  | -0.20645500 |
| C | -4.25483100 | 0.28253000  | -0.29099900 |

|    |             |             |             |
|----|-------------|-------------|-------------|
| C  | -4.12657600 | -1.06949300 | -0.29195500 |
| C  | -2.71784900 | -1.35706500 | -0.20786500 |
| N  | -1.98981400 | -0.18489800 | -0.17397100 |
| H  | -5.16390600 | 0.86099900  | -0.35690700 |
| H  | -4.91073000 | -1.80839900 | -0.35897200 |
| C  | 2.19525600  | 2.64773200  | -0.04800000 |
| C  | -2.18795200 | -2.64715300 | -0.18103800 |
| C  | 2.65321100  | -2.19482700 | -0.05072300 |
| C  | -2.64600000 | 2.19584100  | -0.17833400 |
| Mn | -0.00209600 | -0.00038800 | 0.13919800  |
| Cl | -0.03261500 | -0.00601500 | 2.33092900  |
| C  | 3.80114000  | -3.14538700 | -0.00114600 |
| C  | 4.67344700  | -3.28731200 | -1.08445200 |
| C  | 4.04883900  | -3.92802700 | 1.13091100  |
| C  | 5.75241200  | -4.16743400 | -1.04922500 |
| C  | 5.11737100  | -4.82026900 | 1.18683000  |
| C  | 5.97216700  | -4.93738100 | 0.09189600  |
| C  | 3.14608000  | 3.79560500  | 0.00230900  |
| C  | 3.24726300  | 4.60720800  | 1.13648900  |
| C  | 3.97305200  | 4.10083300  | -1.08280600 |
| C  | 4.13110200  | 5.68270300  | 1.19282700  |
| C  | 4.86929000  | 5.16644300  | -1.04728200 |
| C  | 4.94551600  | 5.96035000  | 0.09604300  |
| C  | -3.79666900 | 3.14423400  | -0.19137400 |
| C  | -4.64862900 | 3.26570600  | 0.91092800  |
| C  | -4.06907600 | 3.94325300  | -1.30571000 |
| C  | -5.72999300 | 4.14426000  | 0.90921700  |
| C  | -5.13977500 | 4.83369700  | -1.32813900 |
| C  | -5.97346400 | 4.93149100  | -0.21516000 |
| C  | -3.14205000 | -3.79329500 | -0.19200900 |
| C  | -3.26615900 | -4.62726600 | -1.30704100 |
| C  | -3.95135700 | -4.07274900 | 0.91366300  |
| C  | -4.15273500 | -5.70124600 | -1.32705500 |
| C  | -4.85047100 | -5.13707400 | 0.91448500  |
| C  | -4.94851500 | -5.95408100 | -0.21074300 |
| F  | 4.48466400  | -2.55762400 | -2.19194100 |
| F  | 6.57165900  | -4.28181200 | -2.09935300 |
| F  | 7.00041800  | -5.78643300 | 0.13584600  |
| F  | 5.33044100  | -5.55826300 | 2.28054000  |
| F  | 3.24234100  | -3.83561100 | 2.19469800  |
| F  | 2.47536300  | 4.36298500  | 2.20191900  |
| F  | 3.91986100  | 3.35205200  | -2.19236300 |
| F  | 4.20654200  | 6.44413800  | 2.28863100  |
| F  | 5.79775500  | 6.98597000  | 0.14031300  |



|   |             |             |             |
|---|-------------|-------------|-------------|
| F | 5.64949100  | 5.43461500  | -2.09913800 |
| F | -3.87828800 | -3.30214300 | 2.00475300  |
| F | -2.51205800 | -4.40552400 | -2.39230800 |
| F | -4.24918700 | -6.48390700 | -2.40663300 |
| F | -5.80406100 | -6.97784500 | -0.21969000 |
| F | -5.61368400 | -5.38157100 | 1.98388500  |
| F | -4.43831700 | 2.51950700  | 2.00120100  |
| F | -3.28251700 | 3.86812300  | -2.38797900 |
| F | -5.37547500 | 5.58734600  | -2.40692400 |
| F | -7.00442100 | 5.77830900  | -0.22650500 |
| F | -6.52985800 | 4.24002900  | 1.97549100  |

**<sup>5</sup>Cat1**

|   |             |             |             |
|---|-------------|-------------|-------------|
| C | 1.71514700  | -2.21084300 | -0.20966500 |
| C | 3.13246900  | -2.44999300 | -0.27374800 |
| C | 3.74412300  | -1.23802800 | -0.36469000 |
| C | 2.70125100  | -0.24898900 | -0.33998200 |
| N | 1.46758300  | -0.85268200 | -0.23565200 |
| H | 3.60354700  | -3.42093400 | -0.24928700 |
| H | 4.80407200  | -1.04112000 | -0.43792200 |
| C | -0.03492200 | 3.08923200  | -0.13332100 |
| C | 0.96008400  | 4.12617000  | -0.19793700 |
| C | 2.16918000  | 3.51261100  | -0.30969900 |
| C | 1.92234400  | 2.09862400  | -0.30830000 |
| N | 0.57395100  | 1.85162600  | -0.19241500 |
| H | 0.75622200  | 5.18531600  | -0.15252300 |
| H | 3.14927500  | 3.95946300  | -0.38154400 |
| C | -2.58579200 | -1.99166500 | 0.06653000  |
| C | -2.82820100 | -3.41032600 | 0.04139900  |
| C | -1.61699100 | -4.02090700 | -0.03550800 |
| C | -0.62081300 | -2.98250000 | -0.06148900 |
| N | -1.23015100 | -1.74690200 | 0.00241600  |
| H | -3.80206900 | -3.87491700 | 0.06836200  |
| H | -1.41168600 | -5.07951100 | -0.08331800 |
| C | -3.35334800 | 0.34782900  | 0.15654500  |
| C | -4.38629300 | 1.34366600  | 0.27003000  |
| C | -3.77818600 | 2.55744800  | 0.21399700  |
| C | -2.36580200 | 2.31664400  | 0.07769900  |
| N | -2.12240900 | 0.95923800  | 0.05342100  |
| H | -5.43954700 | 1.13639500  | 0.38308200  |
| H | -4.24172800 | 3.53120600  | 0.25782800  |
| C | 0.75176000  | -3.21841000 | -0.14403500 |
| C | -1.40542000 | 3.32429100  | -0.01369300 |
| C | 2.93966700  | 1.13282200  | -0.38674400 |

|    |             |             |             |
|----|-------------|-------------|-------------|
| C  | -3.59131400 | -1.02775500 | 0.14782400  |
| Mn | -0.35172000 | 0.04829500  | -0.37879800 |
| Cl | -0.57021000 | 0.01363400  | -2.71308900 |
| C  | -1.86952300 | 4.74063300  | 0.02339900  |
| C  | -2.37958300 | 5.30851200  | 1.19465500  |
| C  | -1.80851500 | 5.55462800  | -1.11233000 |
| C  | -2.81916400 | 6.62919100  | 1.24130100  |
| F  | -2.46228000 | 4.57210200  | 2.31150200  |
| C  | -2.23505100 | 6.88097800  | -1.08760800 |
| F  | -1.32216200 | 5.06565400  | -2.25770900 |
| C  | -2.74377300 | 7.41743400  | 0.09409400  |
| F  | -3.30457900 | 7.14538200  | 2.37543800  |
| F  | -2.16388500 | 7.63858200  | -2.18630800 |
| F  | -3.15776300 | 8.68565500  | 0.12780000  |
| C  | -5.00429900 | -1.49411300 | 0.23436600  |
| C  | -5.48633800 | -2.14788300 | 1.37265000  |
| C  | -5.90132500 | -1.29475000 | -0.82038000 |
| C  | -6.80287200 | -2.59298400 | 1.46357500  |
| F  | -4.66918800 | -2.36738400 | 2.41170600  |
| C  | -7.22497600 | -1.72404600 | -0.74892600 |
| F  | -5.49647700 | -0.66903500 | -1.93065800 |
| C  | -7.67461000 | -2.37724900 | 0.39744900  |
| F  | -7.23580900 | -3.21712500 | 2.56400400  |
| F  | -8.06230600 | -1.51890100 | -1.77020800 |
| F  | -8.93943600 | -2.79542600 | 0.47488600  |
| C  | 1.21851300  | -4.63382900 | -0.16747000 |
| C  | 1.78052700  | -5.19516600 | -1.31882700 |
| C  | 1.11201900  | -5.45224400 | 0.96106300  |
| C  | 2.22293800  | -6.51608500 | -1.34928300 |
| F  | 1.90989200  | -4.45666100 | -2.42556200 |
| C  | 1.54095800  | -6.77707100 | 0.95210400  |
| F  | 0.57784800  | -4.96517600 | 2.08986500  |
| C  | 2.10012000  | -7.30839300 | -0.20899000 |
| F  | 2.75683000  | -7.02873900 | -2.46176000 |
| F  | 1.42542900  | -7.53733400 | 2.04618700  |
| F  | 2.51719400  | -8.57577700 | -0.22857300 |
| C  | 4.28563700  | 1.59122300  | -0.47296200 |
| C  | 5.42640300  | 2.00493700  | -0.49222500 |
| C  | 6.77541400  | 2.55013500  | -0.50772100 |
| H  | 6.83698500  | 3.26681000  | -1.33754000 |
| C  | 7.28581300  | 3.22354100  | 0.80886100  |
| H  | 6.64824900  | 4.01750500  | 1.20584000  |
| C  | 7.97282900  | 1.55303400  | -0.57909900 |
| H  | 7.94264900  | 0.82783800  | -1.39356800 |

|   |             |             |             |
|---|-------------|-------------|-------------|
| C | 9.15426900  | 2.54909600  | -0.61727900 |
| H | 10.08878200 | 2.08221000  | -0.29329900 |
| H | 9.31165900  | 2.92363300  | -1.63329000 |
| C | 8.68473600  | 3.69594800  | 0.34353300  |
| H | 9.36413300  | 3.84394300  | 1.18830800  |
| H | 8.61176800  | 4.65059400  | -0.18608700 |
| C | 7.49248600  | 2.03227400  | 1.77645100  |
| H | 8.24666000  | 2.28756900  | 2.52490900  |
| C | 7.96522600  | 0.89649300  | 0.81994800  |
| H | 8.95066500  | 0.48644900  | 1.06063700  |
| C | 6.22064300  | 1.47954100  | 2.48644200  |
| H | 5.33093700  | 2.06529200  | 2.22834100  |
| H | 6.33147200  | 1.49220700  | 3.57640000  |
| C | 6.93931600  | -0.22157500 | 0.97184700  |
| O | 6.88181200  | -1.23933700 | 0.29340800  |
| N | 6.10142900  | 0.11298300  | 1.99464600  |
| H | 5.27685400  | -0.44935900 | 2.15436900  |

**<sup>5</sup>Cat2**

|   |             |             |             |
|---|-------------|-------------|-------------|
| N | -2.10666500 | 0.39780200  | 0.26077100  |
| N | -0.54787500 | -1.87592000 | 0.89491100  |
| N | 1.78087500  | -0.27291300 | 0.92106400  |
| N | 0.22432400  | 2.00701800  | 0.28636800  |
| C | -2.68419400 | 1.57488800  | -0.16044200 |
| C | -4.11588600 | 1.43568700  | -0.17851900 |
| C | -4.40122600 | 0.17981900  | 0.25932500  |
| C | -3.14662200 | -0.47880500 | 0.50697600  |
| C | -3.01653600 | -1.81819000 | 0.87583200  |
| C | -1.78696000 | -2.47051400 | 1.00434600  |
| C | -1.62959400 | -3.89133200 | 1.16121600  |
| C | -0.29377700 | -4.15597600 | 1.09038300  |
| C | 0.37186200  | -2.89580600 | 0.93701300  |
| C | 1.76780500  | -2.74285500 | 0.87992200  |
| C | 2.40985300  | -1.49764500 | 0.95015700  |
| C | 3.82599300  | -1.32543200 | 1.10673600  |
| C | 4.05063500  | 0.01329400  | 1.20386600  |
| C | 2.78037200  | 0.66915700  | 1.04452100  |
| C | 2.61835600  | 2.05014400  | 0.90540800  |
| C | 1.42264000  | 2.65421300  | 0.51396800  |
| C | 1.28139700  | 4.05338600  | 0.20722300  |
| C | 0.01531000  | 4.23847400  | -0.25130900 |
| C | -0.65339900 | 2.96614300  | -0.17501500 |
| H | -4.81052800 | 2.21437600  | -0.45567100 |
| H | -5.37480300 | -0.26472000 | 0.39963800  |

|    |             |             |             |
|----|-------------|-------------|-------------|
| H  | -2.43962000 | -4.59555300 | 1.27879100  |
| H  | 0.21195900  | -5.10811400 | 1.15481600  |
| H  | 4.54283200  | -2.13052300 | 1.10994600  |
| H  | 4.99939500  | 0.51619100  | 1.31210000  |
| H  | 2.05806000  | 4.79481800  | 0.31594700  |
| H  | -0.43478700 | 5.15878500  | -0.59046900 |
| Mn | -0.12163600 | 0.01536500  | 0.32055000  |
| Cl | 0.29189400  | -0.52025600 | -1.97141700 |
| C  | -4.25159700 | -2.62507700 | 1.08274100  |
| C  | -4.58650800 | -3.11122700 | 2.35076400  |
| C  | -5.10762700 | -2.94795000 | 0.02468300  |
| C  | -5.72570500 | -3.88313500 | 2.56567100  |
| C  | -6.25651800 | -3.71221000 | 0.21683700  |
| C  | -6.56377100 | -4.18225200 | 1.49268100  |
| C  | 3.81968400  | 2.90752000  | 1.11027400  |
| C  | 4.37771400  | 3.06507500  | 2.38269900  |
| C  | 4.45232600  | 3.55724100  | 0.04556900  |
| C  | 5.51514300  | 3.83976700  | 2.59606900  |
| C  | 5.58655900  | 4.34348700  | 0.23593300  |
| C  | 6.11947400  | 4.48194600  | 1.51651300  |
| F  | -4.83389900 | -2.51582300 | -1.21197600 |
| F  | -7.05877600 | -4.00370700 | -0.81177000 |
| F  | -7.65973600 | -4.91808000 | 1.68685600  |
| F  | -6.02172400 | -4.33316000 | 3.78918300  |
| F  | -3.79716200 | -2.83984900 | 3.39834700  |
| F  | 3.96437900  | 3.43769000  | -1.19447100 |
| F  | 3.81766100  | 2.45510600  | 3.43580000  |
| F  | 6.02616300  | 3.97461900  | 3.82417900  |
| F  | 7.20706700  | 5.23059100  | 1.70940500  |
| F  | 6.16883500  | 4.95828000  | -0.79808500 |
| C  | 3.21042300  | -4.81314900 | 0.19409900  |
| C  | 3.97174400  | -5.81838100 | -0.52286000 |
| H  | 4.23768500  | -6.63958300 | 0.15540100  |
| C  | 3.30547200  | -6.38425000 | -1.82252100 |
| H  | 2.32123000  | -6.83828000 | -1.68277000 |
| C  | 5.23411600  | -5.29806000 | -1.27978200 |
| H  | 5.96325200  | -4.75739500 | -0.67388300 |
| C  | 5.73824900  | -6.61915800 | -1.90611000 |
| H  | 6.37332500  | -6.43656600 | -2.77772600 |
| H  | 6.33038500  | -7.19058200 | -1.18440200 |
| C  | 4.41110800  | -7.37105900 | -2.27166000 |
| H  | 4.33739700  | -7.60404300 | -3.33800200 |
| H  | 4.32965300  | -8.31595900 | -1.72536000 |
| C  | 3.32354400  | -5.18823500 | -2.80989000 |

|   |             |             |             |
|---|-------------|-------------|-------------|
| H | 3.35703100  | -5.56682200 | -3.83467700 |
| C | 4.63046500  | -4.44151700 | -2.41385300 |
| H | 5.34801600  | -4.33591700 | -3.23372200 |
| N | 2.87787200  | -2.89299000 | -2.34804300 |
| H | 2.36090700  | -2.04184400 | -2.14405700 |
| C | 2.56047900  | -3.90012900 | 0.65881600  |
| C | -2.01087700 | 2.76937300  | -0.43322300 |
| C | -2.81531100 | 3.91055000  | -0.95331500 |
| C | -3.34389200 | 3.88002000  | -2.24841700 |
| C | -3.09705400 | 5.03459400  | -0.17095600 |
| C | -4.11428700 | 4.92669200  | -2.75108800 |
| C | -3.85803200 | 6.09599000  | -0.65447500 |
| C | -4.36927700 | 6.03858400  | -1.95007200 |
| F | -2.62480700 | 5.11202000  | 1.08145700  |
| F | -4.10806400 | 7.16025600  | 0.11557800  |
| F | -5.10348300 | 7.04767300  | -2.42244100 |
| F | -4.60678600 | 4.87325000  | -3.99213900 |
| F | -3.11945600 | 2.82261700  | -3.03454300 |
| C | 4.18879100  | -3.02827900 | -2.01430100 |
| C | 2.18842900  | -4.12730100 | -2.69119200 |
| H | 1.64026500  | -4.01599300 | -3.63262300 |
| H | 1.46120400  | -4.39522300 | -1.91450100 |
| O | 4.91481100  | -2.17873400 | -1.51121900 |

**<sup>5</sup>Cat3**

|   |             |             |             |
|---|-------------|-------------|-------------|
| C | -2.84651500 | -1.10171600 | -0.03407100 |
| C | -4.22044700 | -0.67912400 | 0.04274500  |
| C | -4.22044000 | 0.67921200  | 0.04261200  |
| C | -2.84650200 | 1.10177400  | -0.03425100 |
| N | -2.01917600 | 0.00002100  | -0.08293400 |
| H | -5.07170800 | -1.33992500 | 0.10189000  |
| H | -5.07169400 | 1.34003300  | 0.10163200  |
| C | 1.09788600  | 2.84475700  | -0.13943600 |
| C | 0.67450700  | 4.22069600  | -0.13624100 |
| C | -0.68365400 | 4.21997300  | -0.11874800 |
| C | -1.10536500 | 2.84383300  | -0.09473100 |
| N | -0.00335900 | 2.01557800  | -0.11908200 |
| H | 1.33449800  | 5.07449700  | -0.14628400 |
| H | -1.34517000 | 5.07273400  | -0.12557500 |
| C | 1.09784400  | -2.84474100 | -0.13963200 |
| C | 0.67445200  | -4.22067500 | -0.13638600 |
| C | -0.68370700 | -4.21993800 | -0.11863500 |
| C | -1.10539900 | -2.84379300 | -0.09455800 |
| N | -0.00338700 | -2.01555100 | -0.11908800 |

|    |             |             |             |
|----|-------------|-------------|-------------|
| H  | 1.33443300  | -5.07448200 | -0.14655400 |
| H  | -1.34523600 | -5.07269000 | -0.12534500 |
| C  | 2.83750200  | -1.10180100 | -0.19879900 |
| C  | 4.21028500  | -0.67922800 | -0.29399500 |
| C  | 4.21029700  | 0.67921600  | -0.29386900 |
| C  | 2.83752000  | 1.10179500  | -0.19860900 |
| N  | 2.01009900  | 0.00000100  | -0.15522800 |
| H  | 5.05992200  | -1.34078500 | -0.36806200 |
| H  | 5.05994400  | 1.34077400  | -0.36781600 |
| C  | -2.43918500 | -2.43640700 | -0.04574900 |
| C  | 2.43191300  | 2.43681000  | -0.17419300 |
| C  | -2.43916100 | 2.43646000  | -0.04605700 |
| C  | 2.43187500  | -2.43681100 | -0.17452300 |
| Mn | 0.00143600  | 0.00001200  | 0.16538500  |
| Cl | 0.02166500  | 0.00001500  | 2.50754700  |
| C  | -3.49263200 | 3.49027500  | -0.00234400 |
| C  | -4.35010300 | 3.70546400  | -1.08571300 |
| C  | -3.66348400 | 4.30121500  | 1.12448700  |
| C  | -5.34247000 | 4.68215400  | -1.05545600 |
| C  | -4.64415800 | 5.28970100  | 1.17468200  |
| C  | -5.48690700 | 5.47763000  | 0.08023300  |
| C  | -3.49264800 | -3.49022100 | -0.00180500 |
| C  | -3.66334700 | -4.30104700 | 1.12513100  |
| C  | -4.35023500 | -3.70555000 | -1.08505300 |
| C  | -4.64399700 | -5.28954600 | 1.17554900  |
| C  | -5.34258000 | -4.68225500 | -1.05457400 |
| C  | -5.48686900 | -5.47761100 | 0.08121800  |
| C  | 3.48873900  | -3.48783100 | -0.19645800 |
| C  | 4.33491100  | -3.68752000 | 0.89937200  |
| C  | 3.67732200  | -4.30856400 | -1.31264700 |
| C  | 5.33019500  | -4.66263100 | 0.88904300  |
| C  | 4.66017400  | -5.29472000 | -1.34295200 |
| C  | 5.49019700  | -5.46929500 | -0.23656800 |
| C  | 3.48880500  | 3.48780800  | -0.19588900 |
| C  | 3.67755200  | 4.30866100  | -1.31196200 |
| C  | 4.33485400  | 3.68733900  | 0.90006500  |
| C  | 4.66044100  | 5.29478700  | -1.34203400 |
| C  | 5.33017200  | 4.66241800  | 0.88996900  |
| C  | 5.49033600  | 5.46920800  | -0.23553000 |
| F  | -4.23232400 | 2.95335200  | -2.18828000 |
| F  | -6.14955400 | 4.86462300  | -2.10529300 |
| F  | -6.43132200 | 6.41895600  | 0.11917900  |
| F  | -4.78487400 | 6.05269300  | 2.26252800  |
| F  | -2.86657700 | 4.14269900  | 2.18667600  |

|   |             |             |             |
|---|-------------|-------------|-------------|
| F | -2.86631500 | -4.14240400 | 2.18720700  |
| F | -4.23259500 | -2.95356100 | -2.18772000 |
| F | -4.78456800 | -6.05242500 | 2.26349200  |
| F | -6.43126100 | -6.41895100 | 0.12037600  |
| F | -6.14978000 | -4.86485800 | -2.10429900 |
| F | 4.20421100  | 2.92435600  | 1.99020900  |
| F | 2.89301700  | 4.16065400  | -2.38844600 |
| F | 4.81660200  | 6.06689200  | -2.42212700 |
| F | 6.43806000  | 6.40780200  | -0.25445100 |
| F | 6.12653400  | 4.83150100  | 1.94933100  |
| F | 4.20442200  | -2.92466000 | 1.98962200  |
| F | 2.89266000  | -4.16040900 | -2.38901800 |
| F | 4.81617900  | -6.06670500 | -2.42315200 |
| F | 6.43788800  | -6.40791900 | -0.25571200 |
| F | 6.12667900  | -4.83186200 | 1.94829000  |

**<sup>3</sup>TS2-s**

|   |             |             |             |
|---|-------------|-------------|-------------|
| N | -0.52077900 | 1.99602800  | -0.60322600 |
| N | -2.97756800 | 0.62779600  | -0.39940700 |
| N | -1.58983600 | -1.82160800 | -0.65947800 |
| N | 0.83884300  | -0.41471600 | -0.91835800 |
| C | 0.63746800  | 2.52661900  | -1.10828400 |
| C | 0.61768300  | 3.95253900  | -0.94262100 |
| C | -0.53807200 | 4.26464900  | -0.28751500 |
| C | -1.27340900 | 3.03651300  | -0.11758300 |
| C | -2.60729700 | 2.95056700  | 0.30281800  |
| C | -3.41868500 | 1.82981500  | 0.08300700  |
| C | -4.85827100 | 1.78914400  | 0.20195400  |
| C | -5.26232400 | 0.57436200  | -0.25866200 |
| C | -4.07029200 | -0.17702200 | -0.58326200 |
| C | -4.02957800 | -1.55062100 | -0.85452600 |
| C | -2.85600400 | -2.31607400 | -0.81197000 |
| C | -2.80514900 | -3.75712300 | -0.73231800 |
| C | -1.51229600 | -4.09978100 | -0.46730600 |
| C | -0.74622700 | -2.87815200 | -0.44462900 |
| C | 0.64892400  | -2.79928200 | -0.35306400 |
| C | 1.38521400  | -1.64637500 | -0.65103600 |
| C | 2.81032400  | -1.58493800 | -0.87717700 |
| C | 3.09041200  | -0.33801600 | -1.35071200 |
| C | 1.85162900  | 0.39724900  | -1.34489300 |
| C | 1.74024300  | 1.78344400  | -1.56339900 |
| H | 1.41152100  | 4.61260400  | -1.25981500 |
| H | -0.88966500 | 5.24163600  | 0.01007500  |
| H | -5.47970500 | 2.59873500  | 0.55284600  |

|    |             |             |             |
|----|-------------|-------------|-------------|
| H  | -6.27302000 | 0.20354100  | -0.33614300 |
| H  | -3.65806200 | -4.41271200 | -0.82877600 |
| H  | -1.10012600 | -5.09000000 | -0.33768700 |
| H  | 3.50905100  | -2.38519800 | -0.69113100 |
| H  | 4.05511300  | 0.08785100  | -1.58592300 |
| Mn | -1.06176100 | 0.09923000  | -0.61912600 |
| Cl | -1.37529700 | 0.17695500  | -2.93629900 |
| O  | -0.94869000 | -0.12727800 | 1.08082500  |
| C  | -5.31033300 | -2.28143000 | -1.06835600 |
| C  | -6.23245100 | -2.48744400 | -0.03775200 |
| C  | -5.61439700 | -2.82651300 | -2.32065100 |
| C  | -7.41976400 | -3.18646200 | -0.24119700 |
| C  | -6.79267600 | -3.53588800 | -2.54558600 |
| C  | -7.69810000 | -3.71348900 | -1.50111500 |
| C  | -3.18574500 | 4.15432900  | 0.95857100  |
| C  | -2.72180300 | 4.54650000  | 2.21974800  |
| C  | -4.16646300 | 4.95172200  | 0.36179700  |
| C  | -3.21597500 | 5.67410300  | 2.86969400  |
| C  | -4.68125800 | 6.08103300  | 0.99516400  |
| C  | -4.20141800 | 6.44322700  | 2.25254500  |
| C  | 1.39238500  | -4.01617800 | 0.06956700  |
| C  | 1.29303500  | -4.45427700 | 1.39321200  |
| C  | 2.26936200  | -4.70957300 | -0.77001600 |
| C  | 2.05723400  | -5.50944300 | 1.87789800  |
| C  | 3.05129100  | -5.76302200 | -0.30292100 |
| C  | 2.94650400  | -6.15761000 | 1.02809000  |
| F  | -5.98522200 | -2.00473000 | 1.18829000  |
| F  | -8.28553900 | -3.36430300 | 0.76305600  |
| F  | -8.83110300 | -4.38909400 | -1.70630000 |
| F  | -7.06060300 | -4.04421700 | -3.75261800 |
| F  | -4.76102500 | -2.67665400 | -3.33800600 |
| F  | -4.63848100 | 4.63710600  | -0.85163000 |
| F  | -5.62124800 | 6.82368100  | 0.40144000  |
| F  | -4.68502600 | 7.52563000  | 2.86565100  |
| F  | -2.75646800 | 6.02153500  | 4.07609700  |
| F  | -1.77206000 | 3.82687300  | 2.83741700  |
| F  | 2.40425600  | -4.34193000 | -2.05044200 |
| F  | 0.49890900  | -3.80465500 | 2.25697200  |
| F  | 2.01642500  | -5.83600400 | 3.17676000  |
| F  | 3.74885500  | -7.11541300 | 1.50611100  |
| F  | 3.92942200  | -6.37005900 | -1.10869200 |
| C  | 2.84196000  | 2.45623200  | -2.15556700 |
| C  | 3.80884400  | 2.96604000  | -2.68291900 |
| C  | 4.99772000  | 3.50173900  | -3.32884300 |



|   |             |             |             |
|---|-------------|-------------|-------------|
| H | 4.85689300  | 3.42515700  | -4.41542600 |
| C | 5.46837600  | 4.94390600  | -2.95907200 |
| H | 4.72426200  | 5.73147200  | -3.10112400 |
| C | 6.35444100  | 2.84710700  | -2.91811600 |
| H | 6.40144200  | 1.76011000  | -3.00085700 |
| C | 7.32848000  | 3.62345400  | -3.83356900 |
| H | 8.34955100  | 3.61288500  | -3.44107700 |
| H | 7.35801500  | 3.17668900  | -4.83188900 |
| C | 6.71037100  | 5.06368500  | -3.87432000 |
| H | 7.40372200  | 5.83181100  | -3.51907600 |
| H | 6.41445800  | 5.33740500  | -4.89156200 |
| C | 5.97469900  | 4.80808700  | -1.50173400 |
| H | 6.73379200  | 5.56735800  | -1.29802800 |
| C | 6.55576800  | 3.36051300  | -1.47391300 |
| H | 7.60893000  | 3.29976000  | -1.18238500 |
| C | 4.88811100  | 4.83565600  | -0.39143500 |
| H | 3.89291400  | 5.03403800  | -0.80689700 |
| H | 5.09448400  | 5.60400200  | 0.36182400  |
| C | 5.72368300  | 2.62862300  | -0.42679100 |
| O | 5.79022000  | 1.40942300  | -0.19901500 |
| N | 4.92588000  | 3.50843300  | 0.20398600  |
| H | 4.14307800  | 3.15414100  | 0.77517300  |
| C | 5.44340200  | -2.92357500 | 2.08769400  |
| C | 5.26979000  | -1.60335500 | 1.68658600  |
| C | 4.11480100  | -0.89239400 | 2.05940400  |
| C | 3.10154600  | -1.51269900 | 2.82938900  |
| C | 3.30663000  | -2.84452200 | 3.24967800  |
| C | 4.44940800  | -3.53375900 | 2.88911000  |
| H | 6.01443700  | -1.10478100 | 1.07172000  |
| C | 1.90578000  | -0.77090400 | 3.09054700  |
| H | 2.53461100  | -3.33565300 | 3.83374800  |
| H | 4.57604500  | -4.56537100 | 3.20599300  |
| C | 1.73165800  | 0.51356200  | 2.65278900  |
| C | 2.80899400  | 1.16203500  | 1.89357700  |
| H | 1.10582100  | -1.27136900 | 3.62807000  |
| C | 6.65543200  | -3.71591000 | 1.64893100  |
| H | 7.39629800  | -3.03716600 | 1.21269100  |
| H | 7.12827300  | -4.17223500 | 2.52812200  |
| O | 2.72510600  | 2.33112200  | 1.46641200  |
| C | 0.46328300  | 1.27877900  | 2.78483900  |
| H | 0.64652400  | 2.34819800  | 2.65590200  |
| H | -0.14491200 | 0.97746200  | 1.86139100  |
| C | -0.43101700 | 0.96974900  | 3.97847400  |
| H | -1.31022900 | 1.61796100  | 3.95579500  |

|   |             |             |             |
|---|-------------|-------------|-------------|
| H | -0.78290100 | -0.06596900 | 3.95818800  |
| H | 0.09831100  | 1.13703700  | 4.92368600  |
| C | 6.31239400  | -4.82241300 | 0.63493500  |
| H | 7.21844300  | -5.33831500 | 0.30165900  |
| H | 5.64757800  | -5.57237900 | 1.07092900  |
| H | 5.81655500  | -4.40778800 | -0.24883300 |
| N | 3.93592300  | 0.41122900  | 1.65855400  |
| H | 4.64273300  | 0.82351500  | 1.02374300  |

**<sup>3</sup>TS2-R**

|    |             |             |             |
|----|-------------|-------------|-------------|
| N  | -0.58333900 | 1.97388000  | -0.51507700 |
| N  | -2.98351200 | 0.49479200  | -0.34632400 |
| N  | -1.49987200 | -1.89051400 | -0.65612400 |
| N  | 0.87438700  | -0.38021900 | -0.86816900 |
| C  | 0.56167900  | 2.55384700  | -0.99496900 |
| C  | 0.49175600  | 3.97555400  | -0.80353900 |
| C  | -0.68505000 | 4.23835300  | -0.16584900 |
| C  | -1.38461500 | 2.98459700  | -0.03610700 |
| C  | -2.72406000 | 2.84203600  | 0.33786100  |
| C  | -3.47816800 | 1.68530900  | 0.10554100  |
| C  | -4.91933300 | 1.60788700  | 0.16423500  |
| C  | -5.27011000 | 0.37405500  | -0.29128900 |
| C  | -4.04477800 | -0.34331700 | -0.56491100 |
| C  | -3.94975700 | -1.71250100 | -0.84540200 |
| C  | -2.74719100 | -2.43166100 | -0.80689800 |
| C  | -2.64064400 | -3.87052700 | -0.74181900 |
| C  | -1.33444100 | -4.16611100 | -0.48709600 |
| C  | -0.61580100 | -2.91616800 | -0.45407300 |
| C  | 0.77524700  | -2.78460800 | -0.36253900 |
| C  | 1.46599700  | -1.59820400 | -0.63561900 |
| C  | 2.88663000  | -1.48013400 | -0.86794000 |
| C  | 3.11918200  | -0.21267200 | -1.31130000 |
| C  | 1.85511400  | 0.47742600  | -1.27984800 |
| C  | 1.69261800  | 1.86293200  | -1.46307900 |
| H  | 1.27001700  | 4.66643900  | -1.09226400 |
| H  | -1.06590400 | 5.19685700  | 0.15362700  |
| H  | -5.57067800 | 2.41184100  | 0.47471200  |
| H  | -6.26543900 | -0.02769100 | -0.40560600 |
| H  | -3.46824400 | -4.55742700 | -0.84061000 |
| H  | -0.88410200 | -5.14110300 | -0.36958300 |
| H  | 3.61428000  | -2.25987100 | -0.70725200 |
| H  | 4.06633300  | 0.25311300  | -1.54181400 |
| Mn | -1.04621900 | 0.05148800  | -0.56545500 |
| Cl | -1.35660400 | 0.16525500  | -2.88323700 |

|   |             |             |             |
|---|-------------|-------------|-------------|
| O | -0.94053700 | -0.24377800 | 1.12167500  |
| C | -5.19993600 | -2.48858600 | -1.07659300 |
| C | -6.13686500 | -2.71254300 | -0.06284000 |
| C | -5.46054800 | -3.05756500 | -2.32833200 |
| C | -7.29662900 | -3.45176400 | -0.28257400 |
| C | -6.61042800 | -3.80700900 | -2.56902800 |
| C | -7.53157800 | -4.00174700 | -1.54148500 |
| C | -3.42410300 | 4.01838100  | 0.92670000  |
| C | -3.69252900 | 4.06423400  | 2.29733200  |
| C | -3.84558700 | 5.10094500  | 0.15056900  |
| C | -4.35035700 | 5.14354100  | 2.88233700  |
| C | -4.50370900 | 6.19311200  | 0.71255800  |
| C | -4.75838900 | 6.21029200  | 2.08301900  |
| C | 1.56822600  | -3.98031000 | 0.03092200  |
| C | 1.50162700  | -4.44515600 | 1.34743000  |
| C | 2.46017500  | -4.62497200 | -0.83134700 |
| C | 2.30955600  | -5.48063000 | 1.80317900  |
| C | 3.28674900  | -5.65646800 | -0.39288600 |
| C | 3.21234300  | -6.07912700 | 0.93151100  |
| F | -5.93123600 | -2.20951200 | 1.16244700  |
| F | -8.17697100 | -3.64631400 | 0.70573500  |
| F | -8.63783500 | -4.71576400 | -1.76191200 |
| F | -6.83663800 | -4.33701300 | -3.77532300 |
| F | -4.59165300 | -2.89178500 | -3.33016300 |
| F | -3.61156700 | 5.10771600  | -1.16736600 |
| F | -4.89574800 | 7.21851100  | -0.05092000 |
| F | -5.38952200 | 7.25112400  | 2.63095700  |
| F | -4.59077000 | 5.16468100  | 4.19728500  |
| F | -3.30310700 | 3.05283900  | 3.08748500  |
| F | 2.56621700  | -4.22844900 | -2.10582400 |
| F | 0.69477200  | -3.84118000 | 2.23202200  |
| F | 2.29495800  | -5.83445100 | 3.09557700  |
| F | 4.05522700  | -7.01508800 | 1.38251900  |
| F | 4.17790400  | -6.21479700 | -1.21936600 |
| C | 2.76778600  | 2.59075300  | -2.03908400 |
| C | 3.71354400  | 3.15076200  | -2.55365900 |
| C | 4.88191600  | 3.74869800  | -3.18231700 |
| H | 4.74554400  | 3.69816200  | -4.27096000 |
| C | 5.29787300  | 5.19636700  | -2.77029700 |
| H | 4.52507200  | 5.95937100  | -2.89168700 |
| C | 6.26155900  | 3.13381600  | -2.78689000 |
| H | 6.34935800  | 2.05215600  | -2.90056900 |
| C | 7.20766200  | 3.97200800  | -3.67667100 |
| H | 8.22763100  | 3.98853000  | -3.28149600 |

|   |             |             |             |
|---|-------------|-------------|-------------|
| H | 7.25600500  | 3.55534300  | -4.68719000 |
| C | 6.53594600  | 5.38861900  | -3.67840000 |
| H | 7.19936200  | 6.17186600  | -3.29976200 |
| H | 6.23156200  | 5.67971500  | -4.68827600 |
| C | 5.80659900  | 5.03792700  | -1.31604300 |
| H | 6.53684100  | 5.81847300  | -1.08871100 |
| C | 6.44054100  | 3.61241900  | -1.32782100 |
| H | 7.49442400  | 3.58180600  | -1.03418500 |
| C | 4.71753600  | 4.99390100  | -0.20873700 |
| H | 3.71681100  | 5.16785800  | -0.62172200 |
| H | 4.89423600  | 5.74714800  | 0.56697600  |
| C | 5.63230900  | 2.82041900  | -0.30631800 |
| O | 5.74002400  | 1.59799200  | -0.11528200 |
| N | 4.80222100  | 3.65214700  | 0.34835800  |
| H | 4.02754100  | 3.25048900  | 0.89781000  |
| C | 5.59664900  | -2.78265000 | 2.05278900  |
| C | 5.35958200  | -1.46281900 | 1.68516200  |
| C | 4.17919500  | -0.81392600 | 2.09139700  |
| C | 3.20901300  | -1.49551000 | 2.86333900  |
| C | 3.47823100  | -2.82615600 | 3.25068500  |
| C | 4.64357600  | -3.45504900 | 2.85530700  |
| H | 6.07069700  | -0.91790100 | 1.07005000  |
| C | 1.99122800  | -0.80866900 | 3.15891500  |
| H | 2.73787300  | -3.36418700 | 3.83431200  |
| H | 4.82048000  | -4.48754000 | 3.14391600  |
| C | 1.74127800  | 0.47672400  | 2.75287800  |
| C | 2.76762500  | 1.18029700  | 1.97462200  |
| H | 1.22131100  | -1.35019800 | 3.70353700  |
| C | 6.83305900  | -3.51201400 | 1.57487800  |
| H | 7.53759200  | -2.79215100 | 1.14445700  |
| H | 7.33905600  | -3.97023200 | 2.43438200  |
| O | 2.63393600  | 2.34128100  | 1.53800800  |
| C | 0.39309700  | 1.08481200  | 2.95732800  |
| H | -0.19508500 | 0.80538700  | 2.01282600  |
| C | 6.51834800  | -4.60593200 | 0.53813900  |
| H | 7.43897600  | -5.07529700 | 0.17725800  |
| H | 5.89208400  | -5.39345200 | 0.96497200  |
| H | 5.99111200  | -4.18979500 | -0.32654300 |
| N | 3.92913700  | 0.48537800  | 1.72109300  |
| H | 4.60606100  | 0.94215700  | 1.08399100  |
| C | 0.23666900  | 2.58508400  | 3.19999500  |
| H | 0.60671100  | 3.16721100  | 2.35785900  |
| H | -0.82025100 | 2.81396200  | 3.36348700  |
| H | 0.79610600  | 2.89033200  | 4.09276000  |

|                          |             |             |             |
|--------------------------|-------------|-------------|-------------|
| H                        | -0.14111300 | 0.51163300  | 3.72269100  |
| <b><sup>5</sup>TS2-S</b> |             |             |             |
| N                        | -0.52216100 | 1.99847700  | -0.57936900 |
| N                        | -2.99758000 | 0.63076900  | -0.43776200 |
| N                        | -1.60184400 | -1.80043500 | -0.63497400 |
| N                        | 0.82925100  | -0.41538600 | -0.92938700 |
| C                        | 0.63948600  | 2.53293200  | -1.06537100 |
| C                        | 0.62462100  | 3.95655800  | -0.88430800 |
| C                        | -0.54264700 | 4.26416400  | -0.24465200 |
| C                        | -1.27782100 | 3.03327100  | -0.09851600 |
| C                        | -2.62459000 | 2.94775200  | 0.29268900  |
| C                        | -3.43720000 | 1.83726100  | 0.04608100  |
| C                        | -4.87825200 | 1.80031200  | 0.15979000  |
| C                        | -5.28454900 | 0.58613400  | -0.29749400 |
| C                        | -4.09116100 | -0.16849700 | -0.61383500 |
| C                        | -4.04588700 | -1.54813900 | -0.85729100 |
| C                        | -2.87149100 | -2.30549600 | -0.77855000 |
| C                        | -2.81536500 | -3.74160400 | -0.67178800 |
| C                        | -1.52089900 | -4.07884000 | -0.40279700 |
| C                        | -0.75250000 | -2.86287800 | -0.40822500 |
| C                        | 0.64019500  | -2.79038800 | -0.33803600 |
| C                        | 1.37867900  | -1.64073900 | -0.65630500 |
| C                        | 2.80455400  | -1.58133900 | -0.87573900 |
| C                        | 3.08672500  | -0.33183600 | -1.34147000 |
| C                        | 1.84562900  | 0.40132200  | -1.33964800 |
| C                        | 1.74072200  | 1.79101000  | -1.53300500 |
| H                        | 1.42309800  | 4.61873700  | -1.18506700 |
| H                        | -0.89910200 | 5.23895600  | 0.05419900  |
| H                        | -5.49839200 | 2.61120000  | 0.50972800  |
| H                        | -6.29545000 | 0.21581900  | -0.37414700 |
| H                        | -3.66634500 | -4.40111700 | -0.75819000 |
| H                        | -1.11060900 | -5.06729500 | -0.25564500 |
| H                        | 3.50310400  | -2.38032700 | -0.68376100 |
| H                        | 4.05304400  | 0.09705600  | -1.56489300 |
| Mn                       | -1.08833300 | 0.08812300  | -0.66307400 |
| Cl                       | -1.34553700 | 0.26285100  | -2.97106100 |
| O                        | -0.98438300 | -0.11116500 | 1.09218200  |
| C                        | -5.32162500 | -2.28780900 | -1.06887700 |
| C                        | -6.25497600 | -2.47394800 | -0.04456400 |
| C                        | -5.61019300 | -2.86063300 | -2.31246700 |
| C                        | -7.43857100 | -3.17973800 | -0.24665500 |
| C                        | -6.78436300 | -3.57716400 | -2.53575400 |
| C                        | -7.70143500 | -3.73417200 | -1.49810600 |

|   |             |             |             |
|---|-------------|-------------|-------------|
| C | -3.20700100 | 4.14641600  | 0.95450500  |
| C | -2.75305100 | 4.52482700  | 2.22373400  |
| C | -4.17942600 | 4.95289400  | 0.35634900  |
| C | -3.25030200 | 5.64738800  | 2.88007000  |
| C | -4.69659200 | 6.07750900  | 0.99599300  |
| C | -4.22764700 | 6.42559800  | 2.26142700  |
| C | 1.38498500  | -4.00750700 | 0.08068700  |
| C | 1.29493000  | -4.44879900 | 1.40403200  |
| C | 2.25611000  | -4.69949500 | -0.76659900 |
| C | 2.06189500  | -5.50594300 | 1.88027000  |
| C | 3.04140000  | -5.75383800 | -0.30762800 |
| C | 2.94585300  | -6.15160300 | 1.02317000  |
| F | -6.02257300 | -1.96489700 | 1.17352900  |
| F | -8.31534000 | -3.33799500 | 0.75115700  |
| F | -8.83054300 | -4.41654500 | -1.70169500 |
| F | -7.03719500 | -4.11207700 | -3.73446400 |
| F | -4.74490600 | -2.73134800 | -3.32282700 |
| F | -4.64078600 | 4.65230800  | -0.86480200 |
| F | -5.62847000 | 6.82911300  | 0.40066700  |
| F | -4.71378600 | 7.50334900  | 2.88068700  |
| F | -2.80106400 | 5.98167100  | 4.09397100  |
| F | -1.81070000 | 3.79707100  | 2.84208600  |
| F | 2.38045300  | -4.33032100 | -2.04760600 |
| F | 0.50698200  | -3.80194000 | 2.27519800  |
| F | 2.02991400  | -5.83581200 | 3.17848400  |
| F | 3.75138000  | -7.11049600 | 1.49341300  |
| F | 3.91298700  | -6.35962100 | -1.12131700 |
| C | 2.84159000  | 2.46789900  | -2.12066500 |
| C | 3.80480100  | 2.97997800  | -2.65308900 |
| C | 4.98570600  | 3.51554600  | -3.31345100 |
| H | 4.82670600  | 3.44381500  | -4.39790500 |
| C | 5.46696000  | 4.95464500  | -2.94571600 |
| H | 4.72316700  | 5.74512400  | -3.07231400 |
| C | 6.34684000  | 2.85472300  | -2.92800300 |
| H | 6.38875400  | 1.76794500  | -3.01596700 |
| C | 7.30811600  | 3.63182500  | -3.85613600 |
| H | 8.33541100  | 3.61638200  | -3.48042500 |
| H | 7.31987600  | 3.18912000  | -4.85662600 |
| C | 6.69407900  | 5.07415900  | -3.88081400 |
| H | 7.39563000  | 5.83859400  | -3.53384000 |
| H | 6.38237700  | 5.35305400  | -4.89191200 |
| C | 5.99647800  | 4.81099000  | -1.49747700 |
| H | 6.76111100  | 5.56702400  | -1.30271200 |
| C | 6.57310200  | 3.36135300  | -1.48513900 |

|   |             |             |             |
|---|-------------|-------------|-------------|
| H | 7.63042600  | 3.29556400  | -1.21033700 |
| C | 4.92741000  | 4.83712500  | -0.37031100 |
| H | 3.92672500  | 5.04240900  | -0.76906500 |
| H | 5.14885900  | 5.60024500  | 0.38396900  |
| C | 5.75392000  | 2.62715300  | -0.42952800 |
| O | 5.81881300  | 1.40639900  | -0.20953800 |
| N | 4.96818100  | 3.50634700  | 0.21689500  |
| H | 4.19089900  | 3.15138500  | 0.79541400  |
| C | 5.47247100  | -2.93926200 | 2.06041100  |
| C | 5.30127500  | -1.61648400 | 1.66599200  |
| C | 4.15009000  | -0.90391100 | 2.04652000  |
| C | 3.13679400  | -1.52540500 | 2.81636200  |
| C | 3.34095600  | -2.85921800 | 3.23175300  |
| C | 4.48058900  | -3.54972700 | 2.86449100  |
| H | 6.04508400  | -1.11752500 | 1.05041500  |
| C | 1.94287600  | -0.78383600 | 3.08184500  |
| H | 2.57049500  | -3.34986400 | 3.81823200  |
| H | 4.60632500  | -4.58267700 | 3.17739000  |
| C | 1.77000100  | 0.50553400  | 2.65344000  |
| C | 2.85149500  | 1.15687000  | 1.90053100  |
| H | 1.14160300  | -1.28601600 | 3.61567600  |
| C | 6.67861200  | -3.73438400 | 1.61118300  |
| H | 7.41995700  | -3.05695900 | 1.17373300  |
| H | 7.15442700  | -4.19721400 | 2.48536200  |
| O | 2.77496100  | 2.33138000  | 1.48782800  |
| C | 0.50406200  | 1.27003900  | 2.79179800  |
| H | 0.68793800  | 2.33875100  | 2.65827900  |
| H | -0.11348200 | 0.95703200  | 1.87890200  |
| C | -0.37738100 | 0.96825400  | 3.99835100  |
| H | -1.25954800 | 1.61265800  | 3.97684600  |
| H | -0.72763000 | -0.06812000 | 3.98962300  |
| H | 0.15836400  | 1.14562600  | 4.93824800  |
| C | 6.32394300  | -4.83437400 | 0.59394600  |
| H | 7.22532600  | -5.35331900 | 0.25283800  |
| H | 5.65774600  | -5.58287100 | 1.03038700  |
| H | 5.82491500  | -4.41290900 | -0.28476300 |
| N | 3.97425400  | 0.40294800  | 1.65531200  |
| H | 4.68053000  | 0.81749100  | 1.02162400  |

**<sup>5</sup>TS2-R**

|   |             |             |             |
|---|-------------|-------------|-------------|
| N | -0.58546200 | 1.97552100  | -0.48589400 |
| N | -3.00666800 | 0.49805600  | -0.38157200 |
| N | -1.51943800 | -1.86848900 | -0.62437100 |
| N | 0.85965200  | -0.38253300 | -0.87848400 |

|    |             |             |             |
|----|-------------|-------------|-------------|
| C  | 0.56033400  | 2.55905700  | -0.95095100 |
| C  | 0.49335000  | 3.97933800  | -0.74939500 |
| C  | -0.69335900 | 4.23780000  | -0.12510100 |
| C  | -1.38874000 | 2.98043800  | -0.01204100 |
| C  | -2.73970500 | 2.83815300  | 0.33393800  |
| C  | -3.49701400 | 1.69377900  | 0.07495800  |
| C  | -4.93938500 | 1.62210000  | 0.13190200  |
| C  | -5.29559100 | 0.38972000  | -0.32065600 |
| C  | -4.07077800 | -0.33259100 | -0.58960200 |
| C  | -3.97292100 | -1.70820600 | -0.84200300 |
| C  | -2.77034000 | -2.42016300 | -0.76707800 |
| C  | -2.65889100 | -3.85391700 | -0.67488100 |
| C  | -1.35126200 | -4.14477100 | -0.41624000 |
| C  | -0.62923200 | -2.90093300 | -0.41165300 |
| C  | 0.75961100  | -2.77675200 | -0.34361100 |
| C  | 1.45371100  | -1.59390400 | -0.63931700 |
| C  | 2.87511400  | -1.47904600 | -0.86590800 |
| C  | 3.11009300  | -0.20922600 | -1.30174100 |
| C  | 1.84409800  | 0.47950800  | -1.27393100 |
| C  | 1.68878700  | 1.86821400  | -1.43250700 |
| H  | 1.27380000  | 4.67248300  | -1.02674300 |
| H  | -1.08148200 | 5.19396400  | 0.19297100  |
| H  | -5.58701500 | 2.42822400  | 0.44449600  |
| H  | -6.29204200 | -0.01000600 | -0.43188200 |
| H  | -3.48459500 | -4.54448600 | -0.76360000 |
| H  | -0.90341900 | -5.11854000 | -0.28118800 |
| H  | 3.60232000  | -2.25789800 | -0.69910100 |
| H  | 4.05902700  | 0.25878900  | -1.52085800 |
| Mn | -1.07726900 | 0.03861400  | -0.60810200 |
| Cl | -1.33276700 | 0.26103800  | -2.91381100 |
| O  | -0.97708000 | -0.21915600 | 1.13743600  |
| C  | -5.21844500 | -2.49213000 | -1.06969800 |
| C  | -6.16717400 | -2.69484600 | -0.06241400 |
| C  | -5.46358000 | -3.08917600 | -2.31150800 |
| C  | -7.32381000 | -3.43972700 | -0.27982600 |
| C  | -6.60989900 | -3.84474700 | -2.54955400 |
| C  | -7.54328700 | -4.01746500 | -1.52906700 |
| C  | -3.43876300 | 4.01395100  | 0.92715500  |
| C  | -3.66348000 | 4.07927900  | 2.30450400  |
| C  | -3.89408400 | 5.07889200  | 0.14638800  |
| C  | -4.31401800 | 5.16207500  | 2.89165000  |
| C  | -4.54673700 | 6.17333600  | 0.71035900  |
| C  | -4.75815600 | 6.21085600  | 2.08781200  |
| C  | 1.55320800  | -3.97315100 | 0.04544500  |



|   |             |             |             |
|---|-------------|-------------|-------------|
| C | 1.49799400  | -4.43999200 | 1.36186400  |
| C | 2.43658800  | -4.61801600 | -0.82591300 |
| C | 2.30770000  | -5.47851300 | 1.80776400  |
| C | 3.26540000  | -5.65151900 | -0.39699700 |
| C | 3.20211500  | -6.07650700 | 0.92727300  |
| F | -5.97629300 | -2.16519100 | 1.15386200  |
| F | -8.21566300 | -3.61334500 | 0.70184900  |
| F | -8.64616400 | -4.73723400 | -1.74694200 |
| F | -6.82096800 | -4.40169100 | -3.74633200 |
| F | -4.58214900 | -2.94532400 | -3.30604100 |
| F | -3.69859800 | 5.06537100  | -1.17763600 |
| F | -4.97272000 | 7.18217200  | -0.05701000 |
| F | -5.38314900 | 7.25423400  | 2.63803100  |
| F | -4.51422600 | 5.20298700  | 4.21280800  |
| F | -3.24010800 | 3.08477700  | 3.09779000  |
| F | 2.53017100  | -4.22076300 | -2.10109600 |
| F | 0.70034500  | -3.83693400 | 2.25502900  |
| F | 2.30386100  | -5.83509700 | 3.09938700  |
| F | 4.04714100  | -7.01482500 | 1.36900500  |
| F | 4.14716100  | -6.21055400 | -1.23291000 |
| C | 2.76225800  | 2.59859900  | -2.00675700 |
| C | 3.70352800  | 3.15942000  | -2.52924900 |
| C | 4.86252200  | 3.75550700  | -3.17662600 |
| H | 4.70296800  | 3.71028000  | -4.26239900 |
| C | 5.29388200  | 5.19930100  | -2.76730300 |
| H | 4.52239000  | 5.96645300  | -2.86918400 |
| C | 6.24715700  | 3.13213000  | -2.81315100 |
| H | 6.32713600  | 2.05059300  | -2.93339500 |
| C | 7.17827300  | 3.96985300  | -3.71895600 |
| H | 8.20633800  | 3.97969400  | -3.34514100 |
| H | 7.20343600  | 3.55751600  | -4.73208900 |
| C | 6.51357500  | 5.38962200  | -3.70034000 |
| H | 7.18851400  | 6.16796900  | -3.33215500 |
| H | 6.18956300  | 5.68675900  | -4.70232000 |
| C | 5.83194800  | 5.03178100  | -1.32475200 |
| H | 6.57026500  | 5.80797200  | -1.10893600 |
| C | 6.45867600  | 3.60328200  | -1.35604500 |
| H | 7.51809900  | 3.56596700  | -1.08400900 |
| C | 4.76514400  | 4.98752900  | -0.19606900 |
| H | 3.75726800  | 5.16994700  | -0.58767700 |
| H | 4.96185500  | 5.73503000  | 0.58037500  |
| C | 5.66640900  | 2.80990500  | -0.32313300 |
| O | 5.77107700  | 1.58576000  | -0.14120700 |
| N | 4.85273800  | 3.64195300  | 0.35116500  |

|   |             |             |             |
|---|-------------|-------------|-------------|
| H | 4.08496600  | 3.24050600  | 0.91087400  |
| C | 5.62862900  | -2.80801900 | 2.01513300  |
| C | 5.39582000  | -1.48515000 | 1.65493100  |
| C | 4.22243800  | -0.83169900 | 2.07323600  |
| C | 3.25371900  | -1.51172700 | 2.84894400  |
| C | 3.51983700  | -2.84497000 | 3.22999800  |
| C | 4.67885600  | -3.47825000 | 2.82345600  |
| H | 6.10521100  | -0.94160100 | 1.03659400  |
| C | 2.04130400  | -0.82111400 | 3.15512300  |
| H | 2.78182900  | -3.38068900 | 3.81869900  |
| H | 4.85310500  | -4.51254200 | 3.10727900  |
| C | 1.79368300  | 0.46885500  | 2.75875900  |
| C | 2.82166900  | 1.17178600  | 1.98053100  |
| H | 1.27205400  | -1.36183000 | 3.70140900  |
| C | 6.85604700  | -3.54290300 | 1.52309900  |
| H | 7.56130600  | -2.82584000 | 1.08921300  |
| H | 7.36684600  | -4.00822400 | 2.37592900  |
| O | 2.69526100  | 2.33793500  | 1.55607700  |
| C | 0.45000000  | 1.08109700  | 2.97660100  |
| H | -0.15055600 | 0.80044900  | 2.04519400  |
| C | 6.52417200  | -4.63023300 | 0.48469500  |
| H | 7.43801000  | -5.10523300 | 0.11403900  |
| H | 5.89541700  | -5.41451100 | 0.91385100  |
| H | 5.99268400  | -4.20654400 | -0.37367400 |
| N | 3.97693000  | 0.47131800  | 1.71326200  |
| H | 4.65120600  | 0.92851600  | 1.07411100  |
| C | 0.30217900  | 2.58343300  | 3.21946100  |
| H | 0.86711000  | 2.89127900  | 4.10790700  |
| H | 0.66638200  | 3.16318400  | 2.37332200  |
| H | -0.75332000 | 2.81576700  | 3.38831500  |
| H | -0.07108600 | 0.51385700  | 3.75574600  |

**<sup>3</sup>TS4-S**

|   |             |             |             |
|---|-------------|-------------|-------------|
| N | 0.30874400  | 2.16201900  | 0.44534300  |
| N | -2.43244100 | 1.35358300  | 0.40870300  |
| N | -1.60693700 | -1.37551700 | 0.51430300  |
| N | 1.11954700  | -0.53428100 | 0.54979800  |
| C | 1.61156900  | 2.38847600  | 0.82701200  |
| C | 1.85149400  | 3.80753700  | 0.87413900  |
| C | 0.70548800  | 4.42254900  | 0.47245300  |
| C | -0.27183200 | 3.39051000  | 0.23955400  |
| C | -1.62509600 | 3.63974600  | -0.00979700 |
| C | -2.62992000 | 2.67634400  | 0.10115600  |
| C | -4.04668800 | 2.94504800  | 0.03557100  |

|    |             |             |             |
|----|-------------|-------------|-------------|
| C  | -4.68529000 | 1.78417000  | 0.34285700  |
| C  | -3.66647200 | 0.78594900  | 0.55080100  |
| C  | -3.93378000 | -0.58085600 | 0.75418800  |
| C  | -2.94860100 | -1.58112900 | 0.69025100  |
| C  | -3.23334900 | -2.99526200 | 0.67018200  |
| C  | -2.05069100 | -3.62759600 | 0.44201900  |
| C  | -1.02788900 | -2.61244900 | 0.36976000  |
| C  | 0.34213300  | -2.86590700 | 0.27842300  |
| C  | 1.32944300  | -1.88499800 | 0.39932100  |
| C  | 2.73637100  | -2.16312200 | 0.54126800  |
| C  | 3.35407200  | -0.98549900 | 0.82373900  |
| C  | 2.33570100  | 0.03563000  | 0.83099000  |
| H  | 2.78267600  | 4.27218600  | 1.15894400  |
| H  | 0.51838700  | 5.48233600  | 0.38414500  |
| H  | -4.48712700 | 3.90296400  | -0.19727500 |
| H  | -5.74603800 | 1.59250200  | 0.40433700  |
| H  | -4.20775400 | -3.44676400 | 0.79001000  |
| H  | -1.88282600 | -4.68987500 | 0.34706700  |
| H  | 3.18960400  | -3.13856600 | 0.45108200  |
| H  | 4.41031200  | -0.81349800 | 0.96309200  |
| Mn | -0.64546400 | 0.40179000  | 0.44008800  |
| Cl | -0.73185500 | 0.46251800  | 2.77404000  |
| O  | -0.76175900 | 0.28019800  | -1.26041500 |
| C  | -2.02519400 | 5.04916000  | -0.28496600 |
| C  | -1.71891800 | 5.66591000  | -1.50124300 |
| C  | -2.70093100 | 5.81631300  | 0.67019400  |
| C  | -2.06777100 | 6.98849300  | -1.76553300 |
| C  | -3.06553500 | 7.13863800  | 0.42704100  |
| C  | -2.74447100 | 7.72589300  | -0.79580600 |
| C  | 0.79054400  | -4.28865700 | 0.22096000  |
| C  | 1.36801200  | -4.84253200 | -0.92355500 |
| C  | 0.68119400  | -5.11725900 | 1.34388700  |
| C  | 1.82828100  | -6.15658000 | -0.95823300 |
| C  | 1.12216600  | -6.43885400 | 1.33035700  |
| C  | 1.70108000  | -6.95857500 | 0.17373100  |
| F  | -3.01480600 | 5.28050500  | 1.85528500  |
| F  | -3.71155600 | 7.84840200  | 1.35766900  |
| F  | -3.08655600 | 8.99286400  | -1.03830500 |
| F  | -1.76399500 | 7.55024400  | -2.94012100 |
| F  | -1.07589800 | 4.98262800  | -2.45857700 |
| F  | 0.14261600  | -4.64268500 | 2.47162900  |
| F  | 1.50037300  | -4.10302400 | -2.03559300 |
| F  | 2.38649000  | -6.64983400 | -2.07008800 |
| F  | 2.13455200  | -8.22059800 | 0.15132100  |

|   |             |             |             |
|---|-------------|-------------|-------------|
| F | 1.00502300  | -7.20574700 | 2.41830500  |
| C | 6.80358900  | -1.85859300 | -1.36742400 |
| C | 5.59061100  | -2.32903800 | -1.86377800 |
| C | 4.56948800  | -1.43568900 | -2.22393100 |
| C | 4.76115500  | -0.03859600 | -2.09059800 |
| C | 6.00094500  | 0.42362600  | -1.60382100 |
| C | 6.99909200  | -0.46550200 | -1.24257100 |
| H | 5.42307800  | -3.39907700 | -1.96653100 |
| C | 3.65827400  | 0.83007700  | -2.38832900 |
| H | 6.15603100  | 1.49326700  | -1.49905100 |
| H | 7.94474900  | -0.09369400 | -0.85760600 |
| C | 2.43770900  | 0.36239900  | -2.77199200 |
| C | 2.23529700  | -1.08666000 | -2.96092700 |
| H | 3.81135400  | 1.89403300  | -2.26435300 |
| C | 7.91895300  | -2.81745200 | -1.01679300 |
| H | 7.49917600  | -3.79673200 | -0.75914500 |
| H | 8.44401900  | -2.45599100 | -0.12429000 |
| O | 1.18425100  | -1.59608600 | -3.33509600 |
| C | 1.23008400  | 1.21005000  | -2.96830700 |
| H | 0.48682700  | 0.88463400  | -2.17968700 |
| C | 8.92724200  | -2.97901300 | -2.16922200 |
| H | 9.73093000  | -3.66918000 | -1.89329400 |
| H | 9.37771500  | -2.01594500 | -2.42993700 |
| H | 8.43283200  | -3.36771300 | -3.06518000 |
| N | 3.35001000  | -1.88165300 | -2.68316900 |
| H | 3.17322900  | -2.87578200 | -2.75366300 |
| C | 1.42278900  | 2.71816100  | -2.88358400 |
| H | 2.08063400  | 3.07997100  | -3.68296400 |
| H | 1.86070900  | 3.01766100  | -1.92704300 |
| H | 0.46315900  | 3.22884600  | -2.97682800 |
| H | 0.71243600  | 0.90593200  | -3.88532900 |
| C | 2.57478100  | 1.39868600  | 1.04122300  |
| C | 3.94282800  | 1.78130100  | 1.48681500  |
| C | 4.45111500  | 1.29535100  | 2.70070700  |
| C | 4.80926500  | 2.56242400  | 0.71789500  |
| C | 5.75911500  | 1.54553800  | 3.10980500  |
| C | 6.12323600  | 2.81479900  | 1.09777400  |
| C | 6.60330400  | 2.30333400  | 2.29997800  |
| F | 4.40490200  | 3.08086400  | -0.45631700 |
| F | 6.93114800  | 3.51232300  | 0.28885000  |
| F | 7.86352100  | 2.53425300  | 2.67281800  |
| F | 6.21119600  | 1.05928100  | 4.26929600  |
| F | 3.68060800  | 0.54703100  | 3.49507700  |
| C | -6.46613500 | -1.28350200 | 0.95570500  |

|   |              |             |             |
|---|--------------|-------------|-------------|
| C | -7.88422600  | -1.60551500 | 0.98681600  |
| H | -8.33152000  | -1.08458600 | 1.84390000  |
| C | -8.70372700  | -1.29152400 | -0.30859000 |
| H | -8.63685400  | -0.26074900 | -0.66582100 |
| C | -8.29942700  | -3.10881900 | 1.00362200  |
| H | -7.85127200  | -3.71963700 | 1.78866900  |
| C | -9.83721300  | -2.96509400 | 1.06765100  |
| H | -10.34379800 | -3.86802500 | 0.71493400  |
| H | -10.16670700 | -2.78643700 | 2.09574200  |
| C | -10.11677400 | -1.71866400 | 0.15805500  |
| H | -10.77000600 | -1.95134700 | -0.68831600 |
| H | -10.59393600 | -0.91399200 | 0.72555500  |
| C | -8.20709100  | -2.34918500 | -1.32534000 |
| H | -8.98247100  | -2.53887000 | -2.07170600 |
| C | -7.93797000  | -3.58856100 | -0.42036800 |
| H | -8.51905300  | -4.47608400 | -0.68846800 |
| C | -6.85566000  | -2.05407700 | -2.04292200 |
| H | -6.45211500  | -1.07675800 | -1.75466000 |
| H | -6.96864300  | -2.06625200 | -3.13261100 |
| C | -6.46046400  | -3.91943500 | -0.60550500 |
| O | -5.82880900  | -4.75230400 | 0.03279600  |
| N | -5.97407800  | -3.12801600 | -1.60319000 |
| H | -4.97836800  | -3.11524300 | -1.77848400 |
| C | -5.29416600  | -0.97309300 | 0.90087100  |

**<sup>3</sup>TS4-R**

|   |             |             |            |
|---|-------------|-------------|------------|
| N | -0.02475300 | 1.98746000  | 0.48069200 |
| N | 2.53334900  | 0.71451500  | 0.45291000 |
| N | 1.24557100  | -1.82891100 | 0.50486500 |
| N | -1.29330200 | -0.52633100 | 0.53490100 |
| C | -1.27140400 | 2.43357600  | 0.85648000 |
| C | -1.26143500 | 3.87306600  | 0.91231900 |
| C | -0.02446400 | 4.28202000  | 0.51828700 |
| C | 0.76059100  | 3.09687900  | 0.28400900 |
| C | 2.13826000  | 3.10821200  | 0.04437500 |
| C | 2.96032900  | 1.98625500  | 0.16249100 |
| C | 4.40355900  | 2.00975000  | 0.13028900 |
| C | 4.83396200  | 0.75830300  | 0.44510100 |
| C | 3.65280700  | -0.05417600 | 0.61514500 |
| C | 3.67445400  | -1.44872900 | 0.78661800 |
| C | 2.53019600  | -2.26170600 | 0.67776500 |
| C | 2.56680900  | -3.70091300 | 0.62160800 |
| C | 1.29494100  | -4.12142900 | 0.38597600 |
| C | 0.46261200  | -2.94407500 | 0.33612400 |

|    |             |             |             |
|----|-------------|-------------|-------------|
| C  | -0.93076900 | -2.95536100 | 0.24133200  |
| C  | -1.73366300 | -1.81929200 | 0.37062700  |
| C  | -3.16747100 | -1.85057800 | 0.50843000  |
| C  | -3.57245400 | -0.58637700 | 0.80310200  |
| C  | -2.39277200 | 0.24204900  | 0.82343500  |
| H  | -2.09946700 | 4.49074500  | 1.19569400  |
| H  | 0.34477900  | 5.29338500  | 0.43588100  |
| H  | 5.00934600  | 2.87791900  | -0.08198400 |
| H  | 5.85548200  | 0.41468500  | 0.52523400  |
| H  | 3.46439200  | -4.29111800 | 0.72925400  |
| H  | 0.94257900  | -5.13508500 | 0.26700700  |
| H  | -3.78319800 | -2.73143000 | 0.40827300  |
| H  | -4.58330400 | -0.23560100 | 0.94364800  |
| Mn | 0.60986400  | 0.09153200  | 0.45300300  |
| Cl | 0.67841900  | 0.09567900  | 2.78902100  |
| O  | 0.72524000  | -0.00840400 | -1.24940100 |
| C  | 2.77899900  | 4.42730200  | -0.22471700 |
| C  | 2.62678600  | 5.06810400  | -1.45697800 |
| C  | 3.53825600  | 5.08215300  | 0.75059000  |
| C  | 3.20285100  | 6.30937000  | -1.71762000 |
| C  | 4.12814500  | 6.32147500  | 0.51215000  |
| C  | 3.95641100  | 6.93647500  | -0.72714300 |
| C  | -1.61841300 | -4.27862800 | 0.17243900  |
| C  | -2.29475700 | -4.71078000 | -0.97069500 |
| C  | -1.64261400 | -5.12856900 | 1.28470300  |
| C  | -2.97476400 | -5.92567200 | -1.01377000 |
| C  | -2.30430700 | -6.35446900 | 1.26226900  |
| C  | -2.97606100 | -6.75224600 | 0.10754000  |
| F  | 3.71241000  | 4.51621000  | 1.94988000  |
| F  | 4.84764600  | 6.92681800  | 1.46194300  |
| F  | 4.51431500  | 8.12514800  | -0.96541100 |
| F  | 3.04217000  | 6.89757200  | -2.90759200 |
| F  | 1.91577500  | 4.48659500  | -2.43396900 |
| F  | -1.01864100 | -4.76956900 | 2.41156600  |
| F  | -2.30940400 | -3.94683100 | -2.07331800 |
| F  | -3.61997100 | -6.30172700 | -2.12425600 |
| F  | -3.61937700 | -7.92121200 | 0.07654000  |
| F  | -2.30824100 | -7.14465200 | 2.34027400  |
| C  | 5.99191400  | -2.68183900 | 1.02239900  |
| C  | 7.23843600  | -3.42937200 | 1.07848800  |
| H  | 7.24647000  | -4.00709500 | 2.01242300  |
| C  | 7.54494400  | -4.37394900 | -0.13047400 |
| H  | 6.76662600  | -5.10572500 | -0.36130900 |
| C  | 8.57643000  | -2.64176700 | 0.92953000  |

|   |              |             |             |
|---|--------------|-------------|-------------|
| H | 8.71579300   | -1.80301100 | 1.61313800  |
| C | 9.59104400   | -3.79837800 | 1.07849800  |
| H | 10.56071800  | -3.54608300 | 0.63983200  |
| H | 9.76086000   | -4.03059200 | 2.13428600  |
| C | 8.88442000   | -4.98930800 | 0.34261800  |
| H | 9.47157800   | -5.37584500 | -0.49584700 |
| H | 8.70374300   | -5.82480500 | 1.02565500  |
| C | 7.86235300   | -3.39777600 | -1.29047100 |
| H | 8.51397900   | -3.88670000 | -2.01887700 |
| C | 8.57033200   | -2.21930600 | -0.55713000 |
| H | 9.58761500   | -2.01816300 | -0.90629800 |
| C | 6.64498200   | -2.76168100 | -2.02634200 |
| H | 5.69462500   | -3.14639000 | -1.63931200 |
| H | 6.67790400   | -2.96080400 | -3.10317300 |
| C | 7.72044300   | -0.98600800 | -0.84605800 |
| O | 7.87082400   | 0.12025900  | -0.34247100 |
| N | 6.77172700   | -1.33408300 | -1.76114600 |
| H | 6.03221700   | -0.67831600 | -1.97375000 |
| C | -7.13356700  | -0.78602900 | -1.41726900 |
| C | -6.02034400  | -1.46376200 | -1.90761900 |
| C | -4.85100600  | -0.76665500 | -2.24982600 |
| C | -4.78838200  | 0.64088700  | -2.10387700 |
| C | -5.92949900  | 1.31544000  | -1.62352300 |
| C | -7.07550600  | 0.61834900  | -1.28013900 |
| H | -6.04789900  | -2.54554600 | -2.01990400 |
| C | -3.54408300  | 1.29843600  | -2.38438200 |
| H | -5.89002900  | 2.39447400  | -1.50897800 |
| H | -7.94229200  | 1.15185400  | -0.89966000 |
| C | -2.42411200  | 0.62102800  | -2.76288000 |
| C | -2.48485100  | -0.83915200 | -2.96368100 |
| H | -3.50378700  | 2.37157800  | -2.25215500 |
| C | -8.40737100  | -1.53038500 | -1.08606800 |
| H | -8.17415700  | -2.57153100 | -0.83458400 |
| H | -8.86773100  | -1.08736200 | -0.19461200 |
| O | -1.53893000  | -1.52735300 | -3.33245000 |
| C | -1.08235500  | 1.23827300  | -2.94214700 |
| H | -0.41466900  | 0.77613900  | -2.15126800 |
| C | -9.41623900  | -1.49742400 | -2.24881100 |
| H | -10.33429900 | -2.03306500 | -1.98681700 |
| H | -9.68241900  | -0.46664700 | -2.50380300 |
| H | -8.99098700  | -1.96171000 | -3.14428700 |
| N | -3.72779600  | -1.42161800 | -2.70413500 |
| H | -3.73322800  | -2.43059200 | -2.78338100 |
| C | -0.99941400  | 2.75521400  | -2.84161200 |

|   |             |             |             |
|---|-------------|-------------|-------------|
| H | -1.56998700 | 3.23774300  | -3.64432100 |
| H | -1.38919100 | 3.11961000  | -1.88681100 |
| H | 0.03790400  | 3.08480100  | -2.91744100 |
| H | -0.61832700 | 0.85323800  | -3.85741200 |
| C | -2.39244600 | 1.62386600  | 1.05333600  |
| C | -3.67597400 | 2.23189100  | 1.50014900  |
| C | -4.26649000 | 1.82621100  | 2.70628300  |
| C | -4.39091400 | 3.16010100  | 0.73905500  |
| C | -5.51376500 | 2.29322500  | 3.11489100  |
| C | -5.64352100 | 3.63076500  | 1.11850600  |
| C | -6.21062000 | 3.19512600  | 2.31258300  |
| C | 4.93125600  | -2.09661200 | 0.94954200  |
| F | -3.89766000 | 3.61528300  | -0.42740500 |
| F | -6.31500500 | 4.46703100  | 0.31633900  |
| F | -7.41403600 | 3.63531800  | 2.68476800  |
| F | -6.04882900 | 1.87791600  | 4.26666700  |
| F | -3.64074200 | 0.94616300  | 3.49287600  |

**<sup>5</sup>TS4-S**

|   |             |             |             |
|---|-------------|-------------|-------------|
| N | -0.32868100 | 2.18410000  | -0.46368300 |
| N | 2.42609500  | 1.36678500  | -0.45496600 |
| N | 1.61509900  | -1.35221200 | -0.58845300 |
| N | -1.12829800 | -0.54025100 | -0.58054500 |
| C | -1.64495700 | 2.39965700  | -0.78865500 |
| C | -1.90140800 | 3.81818500  | -0.83954000 |
| C | -0.74090900 | 4.44293300  | -0.50112900 |
| C | 0.24472100  | 3.41023100  | -0.29316000 |
| C | 1.60918700  | 3.66211500  | -0.06662000 |
| C | 2.61385900  | 2.70287200  | -0.16147800 |
| C | 4.02925300  | 2.97565400  | -0.06563900 |
| C | 4.67830800  | 1.81504400  | -0.34205200 |
| C | 3.66638900  | 0.81119300  | -0.56414700 |
| C | 3.94300300  | -0.55485800 | -0.76483400 |
| C | 2.95931700  | -1.55839500 | -0.73680400 |
| C | 3.24940000  | -2.97252300 | -0.74029800 |
| C | 2.06521100  | -3.61238800 | -0.55488100 |
| C | 1.03695500  | -2.60219600 | -0.48174600 |
| C | -0.32654700 | -2.86527000 | -0.39607100 |
| C | -1.33067300 | -1.88818400 | -0.47408100 |
| C | -2.73802200 | -2.17901200 | -0.59063400 |
| C | -3.37095800 | -0.99431800 | -0.80551800 |
| C | -2.35424300 | 0.03066800  | -0.80326000 |
| H | -2.84589400 | 4.27557900  | -1.09030100 |
| H | -0.55429400 | 5.50444500  | -0.43749700 |



|    |             |             |             |
|----|-------------|-------------|-------------|
| H  | 4.46274800  | 3.93605400  | 0.16882800  |
| H  | 5.74086700  | 1.62692400  | -0.37667300 |
| H  | 4.22773100  | -3.41809200 | -0.84775000 |
| H  | 1.89976900  | -4.67695600 | -0.48506400 |
| H  | -3.18087000 | -3.16149100 | -0.52923300 |
| H  | -4.43159800 | -0.82431000 | -0.90939700 |
| Mn | 0.66808900  | 0.40298400  | -0.49047500 |
| Cl | 0.60206500  | 0.55324400  | -2.84037300 |
| O  | 0.73685300  | 0.32167800  | 1.23140000  |
| C  | 2.00347100  | 5.07465100  | 0.19902500  |
| C  | 1.63124700  | 5.71737800  | 1.38398800  |
| C  | 2.73208700  | 5.82272500  | -0.73253000 |
| C  | 1.97176500  | 7.04282000  | 1.64273100  |
| C  | 3.08904600  | 7.14796900  | -0.49360400 |
| C  | 2.70509600  | 7.75929500  | 0.69870400  |
| C  | -0.76406300 | -4.29187000 | -0.35912900 |
| C  | -1.32241500 | -4.86517000 | 0.78505100  |
| C  | -0.66393600 | -5.10283800 | -1.49517800 |
| C  | -1.77571500 | -6.18151500 | 0.80746500  |
| C  | -1.09917200 | -6.42663800 | -1.49473400 |
| C  | -1.66039900 | -6.96584900 | -0.33828700 |
| F  | 3.10641100  | 5.26706300  | -1.89057300 |
| F  | 3.78743600  | 7.83782700  | -1.40107300 |
| F  | 3.03962900  | 9.02917400  | 0.93629800  |
| F  | 1.60463300  | 7.62823800  | 2.78734600  |
| F  | 0.92476400  | 5.05756800  | 2.31258600  |
| F  | -0.14075600 | -4.60954100 | -2.62167900 |
| F  | -1.43861200 | -4.14162300 | 1.91010800  |
| F  | -2.31588000 | -6.69382300 | 1.91978500  |
| F  | -2.08775900 | -8.23012100 | -0.32861400 |
| F  | -0.99259200 | -7.17741300 | -2.59482200 |
| C  | -6.72014400 | -1.91962900 | 1.43114000  |
| C  | -5.50300100 | -2.40260200 | 1.90230500  |
| C  | -4.47245400 | -1.51924000 | 2.26081000  |
| C  | -4.65755600 | -0.11658900 | 2.14561000  |
| C  | -5.90786900 | 0.35736200  | 1.69008000  |
| C  | -6.91341200 | -0.52181100 | 1.33328200  |
| H  | -5.33916300 | -3.47449700 | 1.98821400  |
| C  | -3.55044800 | 0.74086800  | 2.43196800  |
| H  | -6.06243100 | 1.42874500  | 1.61129400  |
| H  | -7.86511600 | -0.14163100 | 0.97239000  |
| C  | -2.32528000 | 0.26324800  | 2.81583800  |
| C  | -2.13914200 | -1.19234000 | 3.00687300  |
| H  | -3.69354000 | 1.80653800  | 2.31209200  |

|   |             |             |             |
|---|-------------|-------------|-------------|
| C | -7.84491500 | -2.86636000 | 1.08024800  |
| H | -7.43537500 | -3.84927400 | 0.82075700  |
| H | -8.36694400 | -2.49746400 | 0.18898000  |
| O | -1.10079800 | -1.71389500 | 3.39487700  |
| C | -1.12128300 | 1.09106900  | 2.98864900  |
| H | -0.39329600 | 0.76096200  | 2.13182900  |
| C | -8.85404100 | -3.01862400 | 2.23358600  |
| H | -9.66514700 | -3.69921300 | 1.95607500  |
| H | -9.29414700 | -2.05142800 | 2.49659300  |
| H | -8.36346400 | -3.41496100 | 3.12822300  |
| N | -3.25627400 | -1.97726000 | 2.70996700  |
| H | -3.08529400 | -2.97330100 | 2.76815100  |
| C | -1.27568500 | 2.60234700  | 2.93011200  |
| H | -1.88343600 | 2.97757100  | 3.76331800  |
| H | -1.74688700 | 2.92664900  | 1.99754400  |
| H | -0.29698000 | 3.08215600  | 2.98151500  |
| H | -0.54079600 | 0.74520100  | 3.85095000  |
| C | -2.60688700 | 1.39962700  | -0.97071600 |
| C | -3.98824200 | 1.78337400  | -1.37385800 |
| C | -4.52714100 | 1.31746000  | -2.58273800 |
| C | -4.83158300 | 2.55990000  | -0.57539200 |
| C | -5.84283000 | 1.58086600  | -2.95745000 |
| C | -6.15272200 | 2.82434900  | -0.92063500 |
| C | -6.66364500 | 2.33213600  | -2.11803300 |
| F | -4.39841600 | 3.05848200  | 0.59758800  |
| F | -6.93757400 | 3.51402400  | -0.08280300 |
| F | -7.93098600 | 2.57460800  | -2.45789000 |
| F | -6.32431400 | 1.11425800  | -4.11305200 |
| F | -3.77942600 | 0.58044200  | -3.40781900 |
| C | 6.48098800  | -1.25253500 | -0.87837900 |
| C | 7.89936800  | -1.57177900 | -0.85130100 |
| H | 8.38283000  | -1.03537700 | -1.67873000 |
| C | 8.65847200  | -1.27582700 | 0.48504000  |
| H | 8.57159200  | -0.25100100 | 0.85473300  |
| C | 8.32049100  | -3.07343900 | -0.87289900 |
| H | 7.91026800  | -3.67324100 | -1.68665200 |
| C | 9.85898300  | -2.92345100 | -0.86590200 |
| H | 10.35290000 | -3.83040000 | -0.50567900 |
| H | 10.23332500 | -2.72669600 | -1.87517200 |
| C | 10.09255200 | -1.69136800 | 0.07557900  |
| H | 10.70758300 | -1.93607300 | 0.94679400  |
| H | 10.59205200 | -0.87610000 | -0.45646800 |
| C | 8.12033000  | -2.35103900 | 1.46138100  |
| H | 8.86205900  | -2.54965500 | 2.23896700  |

|   |            |             |             |
|---|------------|-------------|-------------|
| C | 7.89774100 | -3.57684500 | 0.52586600  |
| H | 8.47023200 | -4.46631800 | 0.80567300  |
| C | 6.73654200 | -2.07218700 | 2.12150400  |
| H | 6.34277000 | -1.09113500 | 1.83248400  |
| H | 6.79993400 | -2.10281000 | 3.21481500  |
| C | 6.41481000 | -3.91640800 | 0.63891400  |
| O | 5.81739500 | -4.74269400 | -0.03961200 |
| N | 5.87970400 | -3.14079800 | 1.62384400  |
| H | 4.87708400 | -3.13448900 | 1.75499900  |
| C | 5.30701500 | -0.94297300 | -0.86832500 |

**<sup>5</sup>TS4-R**

|    |             |             |             |
|----|-------------|-------------|-------------|
| N  | 0.02719500  | 2.00897200  | -0.50225300 |
| N  | -2.53400800 | 0.71172700  | -0.49669700 |
| N  | -1.24957800 | -1.81915100 | -0.57883200 |
| N  | 1.30403200  | -0.52770200 | -0.56351200 |
| C  | 1.28663900  | 2.45292500  | -0.82422400 |
| C  | 1.28494800  | 3.89445000  | -0.88839800 |
| C  | 0.03047100  | 4.30432800  | -0.55782400 |
| C  | -0.75581900 | 3.11347500  | -0.34341000 |
| C  | -2.14488700 | 3.11922900  | -0.12286100 |
| C  | -2.96100000 | 1.99638600  | -0.21784100 |
| C  | -4.40370400 | 2.01368800  | -0.14687900 |
| C  | -4.83814800 | 0.75832700  | -0.43070200 |
| C  | -3.65829900 | -0.05285400 | -0.62275800 |
| C  | -3.68191400 | -1.44773600 | -0.79828200 |
| C  | -2.53386900 | -2.25937400 | -0.72727600 |
| C  | -2.56739300 | -3.70048500 | -0.69632300 |
| C  | -1.29065900 | -4.12138200 | -0.50058100 |
| C  | -0.45901400 | -2.94295200 | -0.44688800 |
| C  | 0.92998400  | -2.95722000 | -0.35430400 |
| C  | 1.74360300  | -1.81727200 | -0.43955200 |
| C  | 3.18047800  | -1.85248100 | -0.54915700 |
| C  | 3.59199300  | -0.57611400 | -0.77890300 |
| C  | 2.40850300  | 0.24939400  | -0.79345600 |
| H  | 2.13373200  | 4.51118600  | -1.14005800 |
| H  | -0.34381200 | 5.31554100  | -0.50288100 |
| H  | -5.00829300 | 2.88048100  | 0.07285600  |
| H  | -5.86028700 | 0.41092500  | -0.47841900 |
| H  | -3.46602500 | -4.29086700 | -0.79329300 |
| H  | -0.93439500 | -5.13622800 | -0.40646100 |
| H  | 3.79258300  | -2.73846800 | -0.47496400 |
| H  | 4.60544400  | -0.22047100 | -0.88380900 |
| Mn | -0.63486300 | 0.08252500  | -0.50427300 |

|    |             |             |             |
|----|-------------|-------------|-------------|
| C1 | -0.56534200 | 0.19124800  | -2.85579300 |
| O  | -0.70928400 | 0.02382200  | 1.21941400  |
| C  | -2.78635500 | 4.44035400  | 0.13111600  |
| C  | -2.55320800 | 5.13840900  | 1.31997000  |
| C  | -3.61896000 | 5.04749200  | -0.81548300 |
| C  | -3.12636600 | 6.38297900  | 1.56874200  |
| C  | -4.20741500 | 6.28944100  | -0.58712400 |
| C  | -3.95774600 | 6.95877500  | 0.60977500  |
| C  | 1.61516800  | -4.28235100 | -0.30353900 |
| C  | 2.28289800  | -4.72892100 | 0.83896800  |
| C  | 1.64683100  | -5.11706800 | -1.42660800 |
| C  | 2.96358700  | -5.94334100 | 0.87165400  |
| C  | 2.31033800  | -6.34237200 | -1.41516900 |
| C  | 2.97428900  | -6.75456800 | -0.26097200 |
| F  | -3.86763200 | 4.43408700  | -1.97766800 |
| F  | -4.99889100 | 6.84629100  | -1.50887600 |
| F  | -4.51352800 | 8.15049700  | 0.83720500  |
| F  | -2.88737100 | 7.02448300  | 2.71736800  |
| F  | -1.75705200 | 4.61285900  | 2.26222400  |
| F  | 1.02922700  | -4.74435300 | -2.55211600 |
| F  | 2.28481800  | -3.97908800 | 1.95188700  |
| F  | 3.60060700  | -6.33359400 | 1.98213600  |
| F  | 3.61876200  | -7.92313600 | -0.24075800 |
| F  | 2.32280500  | -7.11857500 | -2.50309900 |
| C  | 7.07861600  | -0.81295600 | 1.47768400  |
| C  | 5.97027700  | -1.51214500 | 1.94652200  |
| C  | 4.78850100  | -0.83562700 | 2.28762100  |
| C  | 4.70618500  | 0.57522200  | 2.15640100  |
| C  | 5.84847300  | 1.27188500  | 1.70373000  |
| C  | 7.00525000  | 0.59486000  | 1.36431900  |
| H  | 6.01126700  | -2.59470100 | 2.04462800  |
| C  | 3.45435100  | 1.21104800  | 2.42562700  |
| H  | 5.79884600  | 2.35220800  | 1.61281500  |
| H  | 7.87101000  | 1.14448300  | 1.00524800  |
| C  | 2.33846400  | 0.51458900  | 2.80773200  |
| C  | 2.42909500  | -0.94761000 | 3.01508900  |
| H  | 3.39453600  | 2.28330000  | 2.29428300  |
| C  | 8.36500900  | -1.53395600 | 1.14609000  |
| H  | 8.15060700  | -2.57888500 | 0.89430300  |
| H  | 8.81686700  | -1.08170000 | 0.25489100  |
| O  | 1.50424200  | -1.65192200 | 3.40195900  |
| C  | 0.99860500  | 1.10195700  | 2.96629100  |
| H  | 0.34732800  | 0.63361500  | 2.11305300  |
| C  | 9.37346800  | -1.48242000 | 2.30886600  |

|   |              |             |             |
|---|--------------|-------------|-------------|
| H | 10.30105900  | -2.00034500 | 2.04529900  |
| H | 9.62067400   | -0.44714800 | 2.56462300  |
| H | 8.95769800   | -1.95573700 | 3.20399500  |
| N | 3.67689100   | -1.51021500 | 2.73545800  |
| H | 3.69730100   | -2.51972700 | 2.80608600  |
| C | 0.86497700   | 2.61436800  | 2.88870100  |
| H | 1.38323400   | 3.10781300  | 3.72070300  |
| H | 1.27461800   | 3.01067200  | 1.95486200  |
| H | -0.18728300  | 2.90065700  | 2.92694800  |
| H | 0.48989500   | 0.66367600  | 3.83191500  |
| C | 2.41225100   | 1.63982200  | -0.98586900 |
| C | 3.70517800   | 2.25736800  | -1.39224800 |
| C | 4.32436800   | 1.87546700  | -2.59207400 |
| C | 4.39346000   | 3.18320700  | -0.60447000 |
| C | 5.57476000   | 2.36145800  | -2.96762300 |
| C | 5.64891000   | 3.67170100  | -0.95061600 |
| C | 6.24536200   | 3.25889400  | -2.13835000 |
| F | 3.87273700   | 3.61539000  | 0.55915800  |
| F | 6.29514000   | 4.50188600  | -0.12183100 |
| F | 7.45185400   | 3.71608200  | -2.47866500 |
| F | 6.13754400   | 1.96925200  | -4.11414600 |
| F | 3.72326700   | 1.00458500  | -3.40658000 |
| C | -6.00296000  | -2.68333900 | -0.96146700 |
| C | -7.24809100  | -3.43435000 | -0.97337500 |
| H | -7.28604900  | -4.01307700 | -1.90599900 |
| C | -7.50751800  | -4.37952700 | 0.24654000  |
| H | -6.71824100  | -5.10762600 | 0.44998400  |
| C | -8.58325900  | -2.65224000 | -0.77760600 |
| H | -8.75023300  | -1.81450300 | -1.45624900 |
| C | -9.59731600  | -3.81341600 | -0.89028900 |
| H | -10.55205500 | -3.56494200 | -0.41802700 |
| H | -9.80307200  | -4.04713300 | -1.93933800 |
| C | -8.86015700  | -5.00078800 | -0.17900100 |
| H | -9.41570500  | -5.38904100 | 0.67993200  |
| H | -8.70009700  | -5.83609300 | -0.86738800 |
| C | -7.78802700  | -3.40370300 | 1.41630500  |
| H | -8.41152300  | -3.89509000 | 2.16731100  |
| C | -8.52634000  | -2.22876700 | 0.70768900  |
| H | -9.53143200  | -2.03133600 | 1.09240400  |
| C | -6.54822400  | -2.76193300 | 2.10853800  |
| H | -5.61019500  | -3.14509100 | 1.69108000  |
| H | -6.54397800  | -2.95810200 | 3.18639100  |
| C | -7.67149900  | -0.99167100 | 0.96478900  |
| O | -7.84510000  | 0.11330800  | 0.46595100  |

|   |             |             |             |
|---|-------------|-------------|-------------|
| N | -6.68801600 | -1.33550800 | 1.84386900  |
| H | -5.94419900 | -0.67672000 | 2.03078300  |
| C | -4.94088900 | -2.09629500 | -0.92445500 |

**<sup>3</sup>TS5-S**

|    |             |             |             |
|----|-------------|-------------|-------------|
| N  | 0.21545500  | 1.63524600  | -0.00667800 |
| N  | -2.55110300 | 1.14048800  | 0.19054900  |
| N  | -2.05716400 | -1.62979800 | -0.00174900 |
| N  | 0.70413200  | -1.11011300 | -0.20897800 |
| C  | 1.54900100  | 1.67896100  | 0.28737600  |
| C  | 2.00235300  | 3.04040400  | 0.24800600  |
| C  | 0.93094000  | 3.80821600  | -0.11445500 |
| C  | -0.20350300 | 2.92605900  | -0.22169300 |
| C  | -1.54060300 | 3.32453800  | -0.33586000 |
| C  | -2.62411100 | 2.48665500  | -0.05536400 |
| C  | -3.97340100 | 2.93816100  | 0.18721400  |
| C  | -4.68395200 | 1.85983300  | 0.61800700  |
| C  | -3.79768200 | 0.71976900  | 0.56991100  |
| C  | -4.18550600 | -0.61808400 | 0.72171900  |
| C  | -3.37251700 | -1.70133800 | 0.36826900  |
| C  | -3.84176100 | -3.05543400 | 0.17687900  |
| C  | -2.81287000 | -3.76458100 | -0.36141100 |
| C  | -1.68104500 | -2.87147100 | -0.44490000 |
| C  | -0.37684000 | -3.25071400 | -0.77227200 |
| C  | 0.74019300  | -2.43723300 | -0.55127100 |
| C  | 2.09220900  | -2.92146200 | -0.41874200 |
| C  | 2.84044100  | -1.89776800 | 0.08053900  |
| C  | 1.97202500  | -0.75322400 | 0.17279400  |
| C  | 2.37618700  | 0.55563900  | 0.48011900  |
| H  | 3.02189400  | 3.34525000  | 0.43310900  |
| H  | 0.90103300  | 4.87874600  | -0.25234300 |
| H  | -4.31210600 | 3.95891700  | 0.08579700  |
| H  | -5.72131500 | 1.82975600  | 0.91470100  |
| H  | -4.84336900 | -3.39837400 | 0.39027500  |
| H  | -2.80388300 | -4.80453300 | -0.65221300 |
| H  | 2.40385400  | -3.93524200 | -0.62040200 |
| H  | 3.87588100  | -1.90079600 | 0.38100600  |
| Mn | -0.91651000 | 0.00987100  | -0.05983000 |
| Cl | -0.69540300 | -0.13927900 | 2.30873100  |
| O  | -1.19747100 | 0.08285000  | -1.74574300 |
| C  | -5.57548100 | -0.91972400 | 1.16350300  |
| C  | -6.68893000 | -0.63887200 | 0.36534800  |
| C  | -5.80962100 | -1.53527100 | 2.39831100  |
| C  | -7.98512200 | -0.93582500 | 0.77940200  |

|   |             |             |             |
|---|-------------|-------------|-------------|
| C | -7.09705600 | -1.84822700 | 2.83001700  |
| C | -8.18744200 | -1.54458400 | 2.01683900  |
| C | -1.83402200 | 4.74271700  | -0.68406700 |
| C | -2.32731800 | 5.06401100  | -1.95252500 |
| C | -1.64781800 | 5.79179800  | 0.21977200  |
| C | -2.62189400 | 6.37636000  | -2.31510200 |
| C | -1.93093700 | 7.11267100  | -0.12137700 |
| C | -2.42210900 | 7.40288200  | -1.39331700 |
| C | -0.13119200 | -4.64599300 | -1.23356100 |
| C | 0.15872000  | -4.91155200 | -2.57560400 |
| C | -0.15431500 | -5.72543400 | -0.34604900 |
| C | 0.42382000  | -6.20674200 | -3.01863800 |
| C | 0.10330400  | -7.02709700 | -0.76916600 |
| C | 0.39605500  | -7.26420400 | -2.11145400 |
| F | -6.52450900 | -0.06696600 | -0.83574600 |
| F | -9.03148600 | -0.65196100 | -0.00394900 |
| F | -9.42516800 | -1.83731000 | 2.42194700  |
| F | -7.29327600 | -2.43317300 | 4.01584300  |
| F | -4.78200400 | -1.84218900 | 3.19582000  |
| F | -1.17915100 | 5.53905800  | 1.44875600  |
| F | -1.74110700 | 8.09926200  | 0.76115600  |
| F | -2.69827600 | 8.66469500  | -1.72945700 |
| F | -3.08918800 | 6.65762200  | -3.53550400 |
| F | -2.52452700 | 4.09541600  | -2.85667100 |
| F | -0.43026800 | -5.51767700 | 0.94756700  |
| F | 0.17395400  | -3.91925000 | -3.46529600 |
| F | 0.69580400  | -6.44277100 | -4.30665100 |
| F | 0.64563200  | -8.50803300 | -2.52888800 |
| F | 0.07670100  | -8.04508300 | 0.09833000  |
| C | 3.67634900  | 0.76560300  | 0.99978600  |
| C | 4.70468600  | 0.90895900  | 1.62497700  |
| C | 5.84602000  | 1.01080300  | 2.51171700  |
| H | 6.67234400  | 1.51225200  | 1.99164400  |
| C | 6.32728100  | -0.32799800 | 3.15128800  |
| H | 6.56941100  | -1.12928300 | 2.45067300  |
| C | 5.58053600  | 1.69087500  | 3.89583300  |
| H | 5.18513300  | 2.70851500  | 3.84753500  |
| C | 6.99410400  | 1.57899300  | 4.51826500  |
| H | 6.96332000  | 1.64229900  | 5.61000900  |
| H | 7.63647000  | 2.39099900  | 4.16327300  |
| C | 7.50684800  | 0.18776500  | 4.00667700  |
| H | 7.74862500  | -0.49962400 | 4.82241900  |
| H | 8.40815400  | 0.29939500  | 3.39526100  |
| C | 5.17082000  | -0.68882900 | 4.11113600  |

|   |             |             |             |
|---|-------------|-------------|-------------|
| H | 5.52288700  | -1.36613400 | 4.89553100  |
| C | 4.66322500  | 0.68463500  | 4.63877800  |
| H | 4.80453700  | 0.79245200  | 5.71721300  |
| N | 2.86021200  | -0.59342700 | 3.73887600  |
| H | 1.96374500  | -0.79656300 | 3.30765300  |
| C | 6.80869800  | 0.94329000  | -1.15244900 |
| C | 6.01377300  | -0.08490600 | -1.65040100 |
| C | 4.74942200  | 0.18921500  | -2.19108900 |
| C | 4.26251700  | 1.51863600  | -2.24512700 |
| C | 5.09144800  | 2.55025500  | -1.76163000 |
| C | 6.33605300  | 2.27149300  | -1.22435200 |
| H | 6.35969800  | -1.11469100 | -1.59765200 |
| C | 2.92727600  | 1.73691600  | -2.72069900 |
| H | 4.72401500  | 3.57235300  | -1.79691000 |
| H | 6.95574400  | 3.07730300  | -0.84075400 |
| C | 2.10550200  | 0.71632800  | -3.10655100 |
| C | 2.60928500  | -0.67126100 | -3.07929000 |
| H | 2.55739800  | 2.75743600  | -2.72520800 |
| C | 8.17591400  | 0.64527200  | -0.57909400 |
| H | 8.16676800  | -0.34065300 | -0.09939400 |
| H | 8.40921200  | 1.37332800  | 0.20747000  |
| O | 1.94996200  | -1.66016400 | -3.38886100 |
| C | 0.68362200  | 0.87548900  | -3.50023800 |
| H | 0.04712500  | 0.43639300  | -2.65182100 |
| C | 9.27946800  | 0.68559800  | -1.65166400 |
| H | 10.26028600 | 0.47205500  | -1.21492700 |
| H | 9.32302200  | 1.67052700  | -2.12747800 |
| H | 9.08480400  | -0.05342900 | -2.43535600 |
| N | 3.92948200  | -0.81584100 | -2.65657600 |
| H | 4.22969800  | -1.77956400 | -2.58172400 |
| C | 0.17314000  | 2.28537900  | -3.76109500 |
| H | 0.32167900  | 2.93554800  | -2.89414200 |
| H | -0.89955000 | 2.26610800  | -3.96441000 |
| H | 0.68148800  | 2.73967400  | -4.61990000 |
| H | 0.44258300  | 0.18197800  | -4.31294700 |
| C | 3.95652700  | -1.34682600 | 3.44745200  |
| O | 3.98724500  | -2.38270700 | 2.79450400  |
| C | 3.13911500  | 0.71659100  | 4.31275700  |
| H | 2.53974200  | 0.87888600  | 5.21488700  |
| H | 2.89210800  | 1.51254100  | 3.60069000  |

**<sup>3</sup>TS5-R**

|   |             |             |             |
|---|-------------|-------------|-------------|
| N | 0.61630200  | -1.26954000 | -0.15586300 |
| N | -2.18292500 | -1.51933200 | 0.07418200  |



|    |             |             |             |
|----|-------------|-------------|-------------|
| N  | -2.40274200 | 1.28712500  | 0.18620600  |
| N  | 0.38676200  | 1.51681600  | -0.04903700 |
| C  | 1.92162800  | -1.01165600 | 0.16880300  |
| C  | 2.69533100  | -2.21639900 | 0.03788500  |
| C  | 1.84944200  | -3.18405200 | -0.41983600 |
| C  | 0.53194800  | -2.60166400 | -0.48446000 |
| C  | -0.66067500 | -3.31203800 | -0.65443700 |
| C  | -1.91831500 | -2.80707800 | -0.30804900 |
| C  | -3.10545200 | -3.60756800 | -0.12395500 |
| C  | -4.05626200 | -2.79414400 | 0.41193400  |
| C  | -3.48749300 | -1.46817800 | 0.49097800  |
| C  | -4.19214300 | -0.29676600 | 0.79157800  |
| C  | -3.68406600 | 0.98915400  | 0.56405900  |
| C  | -4.47791400 | 2.19440700  | 0.52177800  |
| C  | -3.67215300 | 3.18969900  | 0.05760200  |
| C  | -2.35993700 | 2.62031400  | -0.13055000 |
| C  | -1.20447900 | 3.34995000  | -0.43344600 |
| C  | 0.08886600  | 2.83378400  | -0.30000900 |
| C  | 1.29651300  | 3.61456700  | -0.18994700 |
| C  | 2.28582000  | 2.76795800  | 0.21480800  |
| C  | 1.71640200  | 1.44881100  | 0.26039500  |
| C  | 2.44341000  | 0.26167900  | 0.45636800  |
| H  | 3.74289200  | -2.29482300 | 0.27908100  |
| H  | 2.08194700  | -4.21793000 | -0.62586200 |
| H  | -3.17729000 | -4.66451800 | -0.33482600 |
| H  | -5.06157500 | -3.05812100 | 0.70292700  |
| H  | -5.52554400 | 2.25448100  | 0.77715000  |
| H  | -3.92619700 | 4.22617000  | -0.10900500 |
| H  | 1.36539600  | 4.67655600  | -0.36691300 |
| H  | 3.32394000  | 2.98588100  | 0.41849000  |
| Mn | -0.89073000 | 0.00313900  | -0.03664200 |
| Cl | -0.66832800 | -0.08782900 | 2.33245300  |
| O  | -1.19005900 | 0.06262200  | -1.71847200 |
| C  | -5.60141600 | -0.40226100 | 1.26128100  |
| C  | -6.63018100 | -0.86766000 | 0.43619900  |
| C  | -5.94930800 | 0.00196100  | 2.55513400  |
| C  | -7.94822000 | -0.95010700 | 0.87877700  |
| C  | -7.26226500 | -0.06459400 | 3.01686000  |
| C  | -8.26348800 | -0.54472700 | 2.17454100  |
| C  | -0.58496400 | -4.72712300 | -1.11576100 |
| C  | -0.92797400 | -5.05828200 | -2.42950800 |
| C  | -0.19091800 | -5.76575900 | -0.26803200 |
| C  | -0.87755900 | -6.37129100 | -2.89190600 |
| C  | -0.12979100 | -7.08631300 | -0.70901800 |

|   |             |             |             |
|---|-------------|-------------|-------------|
| C | -0.47694200 | -7.38704200 | -2.02532000 |
| C | -1.37269100 | 4.77932200  | -0.81626500 |
| C | -1.90024500 | 5.11092300  | -2.06885200 |
| C | -1.04030000 | 5.83120500  | 0.04149300  |
| C | -2.07991200 | 6.43588600  | -2.46051400 |
| C | -1.20453700 | 7.16308200  | -0.33152500 |
| C | -1.72820000 | 7.46392000  | -1.58760300 |
| F | -6.36005800 | -1.25045500 | -0.81955500 |
| F | -8.91085100 | -1.40315000 | 0.06833500  |
| F | -9.52403100 | -0.61530000 | 2.60765900  |
| F | -7.56692200 | 0.32527100  | 4.25868300  |
| F | -5.01000500 | 0.47182300  | 3.38202400  |
| F | 0.14432900  | -5.50028100 | 0.99908600  |
| F | 0.25192000  | -8.06390800 | 0.11893400  |
| F | -0.42354100 | -8.64901000 | -2.45707100 |
| F | -1.20718100 | -6.66257800 | -4.15457100 |
| F | -1.31396800 | -4.09789900 | -3.28065200 |
| F | -0.54243200 | 5.57093100  | 1.25880600  |
| F | -2.25259300 | 4.14365500  | -2.92080100 |
| F | -2.58481300 | 6.72746800  | -3.66338500 |
| F | -1.89380000 | 8.73713700  | -1.95358900 |
| F | -0.87284000 | 8.15076500  | 0.50782900  |
| C | 3.76475000  | 0.35639800  | 0.95613900  |
| C | 4.80550900  | 0.39757100  | 1.57598500  |
| C | 5.94742700  | 0.38119300  | 2.46753500  |
| H | 6.83147500  | 0.77107600  | 1.94691600  |
| C | 5.75665600  | 1.11108200  | 3.83881900  |
| H | 5.48670200  | 2.16797400  | 3.77172800  |
| C | 6.25859200  | -0.99548900 | 3.13199300  |
| H | 6.40752700  | -1.83057500 | 2.44523400  |
| C | 7.48517100  | -0.61217500 | 3.99156700  |
| H | 7.63297400  | -1.30891300 | 4.82170600  |
| H | 8.39950200  | -0.62327700 | 3.38945100  |
| C | 7.14287600  | 0.84055900  | 4.47369000  |
| H | 7.11450200  | 0.92826100  | 5.56380900  |
| H | 7.88094500  | 1.56151300  | 4.10823300  |
| C | 4.72127200  | 0.23465400  | 4.59139000  |
| H | 4.87195700  | 0.34047300  | 5.66875200  |
| C | 5.05990100  | -1.19802700 | 4.08606000  |
| H | 5.32126500  | -1.90144900 | 4.88291600  |
| C | 3.21300200  | 0.44599100  | 4.25925800  |
| H | 3.06625500  | 1.25307500  | 3.53179100  |
| H | 2.63637600  | 0.69741700  | 5.15574600  |
| C | 3.77611700  | -1.71233900 | 3.42467000  |

|   |             |             |             |
|---|-------------|-------------|-------------|
| O | 3.68191600  | -2.75023600 | 2.78154400  |
| N | 2.77759600  | -0.83043200 | 3.70843300  |
| H | 1.86100800  | -0.93211000 | 3.28309400  |
| C | 6.89077500  | 0.80539300  | -1.22575400 |
| C | 5.91231400  | 1.70342900  | -1.64211900 |
| C | 4.70485500  | 1.24048400  | -2.18555400 |
| C | 4.47099000  | -0.14738200 | -2.33875600 |
| C | 5.47904800  | -1.04189800 | -1.92890900 |
| C | 6.66087200  | -0.57885500 | -1.37808200 |
| H | 6.07028100  | 2.77342500  | -1.52581500 |
| C | 3.19709900  | -0.57312300 | -2.84352100 |
| H | 5.30068300  | -2.10870700 | -2.03076300 |
| H | 7.42057900  | -1.28293900 | -1.05027900 |
| C | 2.19655300  | 0.30135500  | -3.15170900 |
| C | 2.42298300  | 1.75028500  | -2.99317800 |
| H | 3.02720200  | -1.64107400 | -2.93635600 |
| C | 8.20202600  | 1.30054200  | -0.65783200 |
| H | 8.05443000  | 2.27696800  | -0.18124200 |
| H | 8.53997100  | 0.61453400  | 0.12894100  |
| O | 1.57964100  | 2.61878900  | -3.20805200 |
| C | 0.82743000  | -0.09328300 | -3.58241900 |
| H | 0.13047900  | 0.13525800  | -2.72070200 |
| C | 9.29676800  | 1.41510500  | -1.73421100 |
| H | 10.23900600 | 1.76639900  | -1.30153100 |
| H | 9.47805800  | 0.44515200  | -2.20805600 |
| H | 8.99613900  | 2.11688700  | -2.51866000 |
| N | 3.69933900  | 2.10748400  | -2.56071800 |
| H | 3.82032500  | 3.10278100  | -2.42299900 |
| C | 0.61130600  | -1.54767300 | -3.97957300 |
| H | 0.85764000  | -2.23100200 | -3.16223200 |
| H | -0.43815000 | -1.71689000 | -4.22928800 |
| H | 1.22245400  | -1.81951400 | -4.84821900 |
| H | 0.47032000  | 0.60340400  | -4.34885400 |

**<sup>5</sup>TS5-S**

|   |             |             |             |
|---|-------------|-------------|-------------|
| N | 0.23486100  | 1.63800700  | 0.01194500  |
| N | -2.55565000 | 1.15755500  | 0.18341400  |
| N | -2.09425500 | -1.61746700 | -0.00652700 |
| N | 0.69483100  | -1.14813200 | -0.18761700 |
| C | 1.57291500  | 1.66302700  | 0.26236200  |
| C | 2.04650300  | 3.02001900  | 0.25408400  |
| C | 0.97232400  | 3.80932800  | -0.04625100 |
| C | -0.16904900 | 2.93463200  | -0.15498300 |
| C | -1.50534100 | 3.34829200  | -0.25550900 |

|    |             |             |             |
|----|-------------|-------------|-------------|
| C  | -2.60084200 | 2.51766500  | -0.02088900 |
| C  | -3.95218200 | 2.98463600  | 0.17883700  |
| C  | -4.69838000 | 1.90714400  | 0.53935500  |
| C  | -3.82749300 | 0.75494000  | 0.49445000  |
| C  | -4.24232500 | -0.57712300 | 0.60971100  |
| C  | -3.42936900 | -1.67114200 | 0.29444000  |
| C  | -3.90967100 | -3.02140800 | 0.10653900  |
| C  | -2.86381800 | -3.75791800 | -0.35064400 |
| C  | -1.71411000 | -2.88511800 | -0.39199400 |
| C  | -0.40987000 | -3.29392900 | -0.66400700 |
| C  | 0.72009500  | -2.48137900 | -0.47729300 |
| C  | 2.07141400  | -2.97564300 | -0.36496300 |
| C  | 2.84100800  | -1.93495800 | 0.05932300  |
| C  | 1.97397500  | -0.78645800 | 0.13623700  |
| C  | 2.39505200  | 0.52516200  | 0.41281000  |
| H  | 3.07404600  | 3.30833000  | 0.41999100  |
| H  | 0.94718300  | 4.88402400  | -0.14784200 |
| H  | -4.26965900 | 4.01364000  | 0.09502000  |
| H  | -5.74778800 | 1.88527700  | 0.79045500  |
| H  | -4.92717000 | -3.34428300 | 0.26918500  |
| H  | -2.85826400 | -4.80338200 | -0.61964300 |
| H  | 2.37070900  | -3.99994500 | -0.52769900 |
| H  | 3.88612000  | -1.93009700 | 0.32370300  |
| Mn | -0.94875000 | 0.00074300  | -0.03582200 |
| Cl | -0.63446600 | -0.12535000 | 2.33821800  |
| O  | -1.14421100 | 0.10004800  | -1.74961400 |
| C  | -5.65712600 | -0.85862600 | 0.98037400  |
| C  | -6.72435600 | -0.54582300 | 0.13250100  |
| C  | -5.96300600 | -1.48346200 | 2.19458200  |
| C  | -8.04466700 | -0.82209300 | 0.47931400  |
| C  | -7.27565800 | -1.77560200 | 2.55932100  |
| C  | -8.31889600 | -1.44092300 | 1.69776500  |
| C  | -1.77776800 | 4.78117100  | -0.56116800 |
| C  | -2.23965700 | 5.15258500  | -1.82748400 |
| C  | -1.59590600 | 5.79463500  | 0.38293500  |
| C  | -2.50972600 | 6.48083700  | -2.14906300 |
| C  | -1.85567000 | 7.13030200  | 0.08326100  |
| C  | -2.31642000 | 7.47145300  | -1.18743600 |
| C  | -0.17196200 | -4.71383200 | -1.04755900 |
| C  | 0.24518100  | -5.04392800 | -2.34138200 |
| C  | -0.32018900 | -5.75632600 | -0.12748700 |
| C  | 0.50691200  | -6.36343700 | -2.70718700 |
| C  | -0.06886200 | -7.08143600 | -0.47450900 |
| C  | 0.34891800  | -7.38249000 | -1.76993600 |

|   |             |             |             |
|---|-------------|-------------|-------------|
| F | -6.49004600 | 0.03792000  | -1.05072200 |
| F | -9.04578000 | -0.50812800 | -0.35008500 |
| F | -9.58024600 | -1.71362600 | 2.03849300  |
| F | -7.54081200 | -2.37006600 | 3.72676900  |
| F | -4.98119300 | -1.82020700 | 3.03672700  |
| F | -1.15447300 | 5.49178000  | 1.61038000  |
| F | -1.67137200 | 8.08272000  | 1.00364300  |
| F | -2.56961900 | 8.74787800  | -1.48429400 |
| F | -2.94753300 | 6.81126000  | -3.36808200 |
| F | -2.42940600 | 4.21903100  | -2.76890200 |
| F | -0.71409600 | -5.49076800 | 1.12420500  |
| F | 0.39406200  | -4.08843800 | -3.25883400 |
| F | 0.90126100  | -6.65860400 | -3.95061800 |
| F | 0.59449700  | -8.64932300 | -2.11339500 |
| F | -0.21807000 | -8.06152900 | 0.42339300  |
| C | 3.70888600  | 0.72450300  | 0.89367700  |
| C | 4.74721500  | 0.86702000  | 1.50398300  |
| C | 5.89846300  | 0.97046900  | 2.37536900  |
| H | 6.73114500  | 1.43262200  | 1.82906300  |
| C | 6.34993700  | -0.35670400 | 3.05950000  |
| H | 6.56634600  | -1.18835800 | 2.38649800  |
| C | 5.66034000  | 1.70700600  | 3.73608400  |
| H | 5.29062000  | 2.73200700  | 3.65306000  |
| C | 7.07552600  | 1.58103500  | 4.35194000  |
| H | 7.05463800  | 1.68478600  | 5.44077300  |
| H | 7.73565900  | 2.36274500  | 3.96310300  |
| C | 7.54846700  | 0.15925500  | 3.88810000  |
| H | 7.77796500  | -0.50419000 | 4.72682100  |
| H | 8.44818300  | 0.22519900  | 3.26774900  |
| C | 5.19097500  | -0.65229300 | 4.03812700  |
| H | 5.53036300  | -1.31110100 | 4.84354900  |
| C | 4.72357900  | 0.75149500  | 4.52084100  |
| H | 4.87777700  | 0.89382600  | 5.59346500  |
| C | 3.95384100  | -1.30075800 | 3.40601700  |
| N | 2.88010400  | -0.50995900 | 3.67999500  |
| H | 1.96971600  | -0.70762800 | 3.27418100  |
| C | 6.86981100  | 0.84272700  | -1.29503100 |
| C | 6.04509300  | -0.17009300 | -1.77613900 |
| C | 4.76330500  | 0.12408700  | -2.26270600 |
| C | 4.28686200  | 1.46023400  | -2.27531400 |
| C | 5.14507800  | 2.47623000  | -1.80490800 |
| C | 6.40719000  | 2.17691600  | -1.32468200 |
| H | 6.38365300  | -1.20340400 | -1.75598400 |
| C | 2.94288900  | 1.70076100  | -2.70081200 |

|   |             |             |             |
|---|-------------|-------------|-------------|
| H | 4.78601700  | 3.50180000  | -1.80808000 |
| H | 7.05030900  | 2.97010700  | -0.95355400 |
| C | 2.09559200  | 0.69605500  | -3.09732500 |
| C | 2.58872400  | -0.69930400 | -3.10556000 |
| H | 2.58229000  | 2.72407800  | -2.67276900 |
| C | 8.25687100  | 0.52568400  | -0.78351900 |
| H | 8.27075100  | -0.48452200 | -0.35795700 |
| H | 8.51073000  | 1.21264800  | 0.03328500  |
| O | 1.91606900  | -1.67617500 | -3.41773100 |
| C | 0.68581500  | 0.88362100  | -3.46749200 |
| H | 0.01807100  | 0.45285800  | -2.58477900 |
| H | 0.40130800  | 0.17721400  | -4.25404000 |
| C | 0.18191500  | 2.29724900  | -3.71314400 |
| H | 0.67372600  | 2.75607100  | -4.58002200 |
| H | 0.34981400  | 2.94292900  | -2.84598300 |
| H | -0.89497400 | 2.28415200  | -3.89322400 |
| C | 9.32397900  | 0.63418200  | -1.88799000 |
| H | 9.10947300  | -0.06396300 | -2.70329700 |
| H | 10.32020000 | 0.40737600  | -1.49514200 |
| H | 9.34409400  | 1.64345700  | -2.31144500 |
| N | 3.91780500  | -0.86389600 | -2.71625400 |
| H | 4.20947600  | -1.83212900 | -2.66823100 |
| C | 3.19754800  | 0.81058000  | 4.20708600  |
| H | 2.61101500  | 1.01864700  | 5.10818400  |
| H | 2.96302100  | 1.58903400  | 3.47135800  |
| O | 3.95444300  | -2.35833400 | 2.78809100  |

**<sup>5</sup>TS5-R**

|   |             |             |             |
|---|-------------|-------------|-------------|
| N | 0.60074000  | -1.30637700 | -0.20962700 |
| N | -2.22608200 | -1.53443700 | -0.02848400 |
| N | -2.43256900 | 1.27903200  | 0.14935000  |
| N | 0.38059500  | 1.51379100  | -0.01256700 |
| C | 1.90765500  | -1.05078500 | 0.09679000  |
| C | 2.68098100  | -2.26037500 | -0.00059400 |
| C | 1.82279300  | -3.24028500 | -0.40397400 |
| C | 0.51234100  | -2.64183500 | -0.48949800 |
| C | -0.68444900 | -3.36193600 | -0.64150800 |
| C | -1.95013200 | -2.84050400 | -0.37181500 |
| C | -3.16333900 | -3.61944800 | -0.28627800 |
| C | -4.14191900 | -2.79014200 | 0.15886800  |
| C | -3.55927400 | -1.47375000 | 0.28385100  |
| C | -4.27314100 | -0.30347400 | 0.56367300  |
| C | -3.74076900 | 0.98316700  | 0.42636000  |
| C | -4.52202200 | 2.19793700  | 0.41238300  |

|    |             |             |             |
|----|-------------|-------------|-------------|
| C  | -3.67965900 | 3.20918200  | 0.07188400  |
| C  | -2.36298500 | 2.63562400  | -0.07267800 |
| C  | -1.19737400 | 3.37283400  | -0.28661300 |
| C  | 0.09491600  | 2.84166400  | -0.17334600 |
| C  | 1.30570200  | 3.61359700  | -0.03362200 |
| C  | 2.29879000  | 2.73567100  | 0.28518700  |
| C  | 1.71325400  | 1.42184900  | 0.25844500  |
| C  | 2.43630200  | 0.22023100  | 0.39071500  |
| H  | 3.72851200  | -2.33813900 | 0.24085900  |
| H  | 2.03989200  | -4.28693100 | -0.55576500 |
| H  | -3.24481000 | -4.67151800 | -0.51307500 |
| H  | -5.17271700 | -3.03684000 | 0.36162300  |
| H  | -5.58313600 | 2.25437300  | 0.60425400  |
| H  | -3.91311600 | 4.25746500  | -0.04149400 |
| H  | 1.37722400  | 4.68457000  | -0.14202600 |
| H  | 3.34320900  | 2.93265200  | 0.47652100  |
| Mn | -0.93969100 | -0.01361300 | -0.06121200 |
| Cl | -0.64540600 | -0.17345000 | 2.31458500  |
| O  | -1.12777100 | 0.10077200  | -1.77300600 |
| C  | -5.71357700 | -0.41159100 | 0.92756500  |
| C  | -6.68198800 | -0.83551900 | 0.01223200  |
| C  | -6.15191400 | -0.05438900 | 2.20746500  |
| C  | -8.02947900 | -0.92130400 | 0.35391600  |
| C  | -7.49549100 | -0.12572500 | 2.56949000  |
| C  | -8.43576900 | -0.56288000 | 1.63815700  |
| C  | -0.56473200 | -4.81017900 | -0.97361400 |
| C  | -0.13171800 | -5.22831900 | -2.23536000 |
| C  | -0.83407400 | -5.80520200 | -0.02741000 |
| C  | 0.01981200  | -6.57554900 | -2.55406600 |
| C  | -0.69645300 | -7.15917800 | -0.32493100 |
| C  | -0.26589000 | -7.54390500 | -1.59352200 |
| C  | -1.34446400 | 4.82673400  | -0.57671400 |
| C  | -1.83247300 | 5.24979600  | -1.81755300 |
| C  | -1.02176500 | 5.81243800  | 0.35960500  |
| C  | -1.98510700 | 6.60082700  | -2.12188600 |
| C  | -1.16032700 | 7.16880300  | 0.07482600  |
| C  | -1.64550900 | 7.56181000  | -1.17124600 |
| F  | -6.32195200 | -1.17572400 | -1.23287100 |
| F  | -8.93331100 | -1.33392700 | -0.54130500 |
| F  | -9.72507700 | -0.63737700 | 1.97521700  |
| F  | -7.88741800 | 0.21891900  | 3.80011900  |
| F  | -5.27191000 | 0.37441300  | 3.11786500  |
| F  | -1.23755500 | -5.46635600 | 1.20222300  |
| F  | -0.96482900 | -8.08836000 | 0.59756700  |

|   |             |             |             |
|---|-------------|-------------|-------------|
| F | -0.12766900 | -8.83809400 | -1.88832800 |
| F | 0.43265500  | -6.94374600 | -3.77154600 |
| F | 0.15390000  | -4.32242200 | -3.18190400 |
| F | -0.55861800 | 5.46195900  | 1.56753900  |
| F | -2.17261600 | 4.34790100  | -2.74281600 |
| F | -2.45268300 | 6.98101100  | -3.31511300 |
| F | -1.78579000 | 8.85922300  | -1.45340100 |
| F | -0.83947500 | 8.09231900  | 0.98816600  |
| C | 3.76229100  | 0.29876100  | 0.87334500  |
| C | 4.80479200  | 0.33365600  | 1.49237900  |
| C | 5.94578500  | 0.31815200  | 2.38311200  |
| H | 6.83312500  | 0.68950200  | 1.85370600  |
| C | 5.76022800  | 1.07781100  | 3.73963500  |
| H | 5.50122800  | 2.13575500  | 3.65024500  |
| C | 6.24182100  | -1.04826000 | 3.07540300  |
| H | 6.38291600  | -1.89875100 | 2.40612900  |
| C | 7.47131500  | -0.65968000 | 3.92839800  |
| H | 7.61124100  | -1.34130400 | 4.77225100  |
| H | 8.38620900  | -0.69160500 | 3.32785400  |
| C | 7.14288200  | 0.80561000  | 4.38139200  |
| H | 7.11362800  | 0.91488300  | 5.46947800  |
| H | 7.88864300  | 1.51192500  | 4.00315800  |
| C | 4.71467000  | 0.22667800  | 4.50734500  |
| H | 4.86547800  | 0.35294300  | 5.58246000  |
| C | 5.03982800  | -1.21894300 | 4.03134300  |
| H | 5.29318100  | -1.90883200 | 4.84243300  |
| N | 2.76247400  | -0.83586300 | 3.63828800  |
| H | 1.83956400  | -0.93944200 | 3.22505500  |
| C | 6.92846100  | 0.82075600  | -1.31117900 |
| C | 5.96917800  | 1.75924100  | -1.68085800 |
| C | 4.72791700  | 1.34787500  | -2.18824500 |
| C | 4.43692300  | -0.03082300 | -2.34715500 |
| C | 5.42625300  | -0.96749800 | -1.97958800 |
| C | 6.64245100  | -0.55363000 | -1.46938000 |
| H | 6.17132800  | 2.82114500  | -1.56000300 |
| C | 3.14016600  | -0.40397900 | -2.81726900 |
| H | 5.20352900  | -2.02538100 | -2.08480800 |
| H | 7.38760400  | -1.28794000 | -1.17660700 |
| C | 2.16149800  | 0.51255000  | -3.11385300 |
| C | 2.44756900  | 1.95287300  | -2.93745500 |
| H | 2.92555800  | -1.46384500 | -2.91113300 |
| C | 8.27666000  | 1.25883900  | -0.78517300 |
| H | 8.19178800  | 2.25167200  | -0.32807800 |
| H | 8.59708200  | 0.57291400  | 0.00912600  |



|   |             |             |             |
|---|-------------|-------------|-------------|
| O | 1.63868800  | 2.85748500  | -3.12466500 |
| C | 0.80275500  | 0.16458600  | -3.55124800 |
| H | 0.07655000  | 0.26328100  | -2.62099600 |
| H | 0.39618900  | 0.95209700  | -4.19313600 |
| C | 0.55916000  | -1.24006400 | -4.08140700 |
| H | 1.16115700  | -1.44486500 | -4.97539200 |
| H | 0.79069200  | -2.00196100 | -3.33331800 |
| H | -0.49553100 | -1.35914900 | -4.33971600 |
| C | 9.34952300  | 1.29134400  | -1.88910300 |
| H | 9.06797500  | 1.99162600  | -2.68185200 |
| H | 10.31890000 | 1.60061000  | -1.48552600 |
| H | 9.46803300  | 0.30329600  | -2.34501300 |
| N | 3.74523200  | 2.25453500  | -2.52380600 |
| H | 3.90733400  | 3.24337300  | -2.38045400 |
| C | 3.75143900  | -1.73440000 | 3.37843300  |
| C | 3.20841100  | 0.44487800  | 4.16959900  |
| H | 2.63283900  | 0.71561000  | 5.06105100  |
| H | 3.06821500  | 1.24231800  | 3.42996100  |
| O | 3.65041900  | -2.78604500 | 2.75865600  |

**<sup>3</sup>TS6-S**

|   |             |             |             |
|---|-------------|-------------|-------------|
| N | -0.17724300 | 2.47508400  | 0.41258300  |
| N | -2.62181500 | 1.00086100  | 0.34466600  |
| N | -1.15709500 | -1.40900200 | 0.71724100  |
| N | 1.27437200  | 0.07994200  | 0.78938400  |
| C | 1.01370400  | 3.04696300  | 0.79821600  |
| C | 0.88702300  | 4.48101300  | 0.75281700  |
| C | -0.36162000 | 4.76016700  | 0.28882100  |
| C | -1.03786900 | 3.50229900  | 0.10461500  |
| C | -2.39169600 | 3.38279600  | -0.22078200 |
| C | -3.12707200 | 2.20363200  | -0.07942400 |
| C | -4.55944900 | 2.09901500  | -0.22126200 |
| C | -4.90453700 | 0.84107500  | 0.16526000  |
| C | -3.68300400 | 0.15398000  | 0.49957800  |
| C | -3.61447200 | -1.20954800 | 0.84174900  |
| C | -2.40958900 | -1.92884500 | 0.91180100  |
| C | -2.32592900 | -3.36026900 | 1.05945000  |
| C | -1.01458600 | -3.69221700 | 0.90427300  |
| C | -0.28175500 | -2.46487800 | 0.70854800  |
| C | 1.11255000  | -2.37716100 | 0.62870400  |
| C | 1.82348700  | -1.17784300 | 0.69883600  |
| C | 3.25883600  | -1.07748100 | 0.80625100  |
| C | 3.55315000  | 0.23247900  | 1.01064100  |
| C | 2.30668400  | 0.95921500  | 0.98739300  |

|    |             |             |             |
|----|-------------|-------------|-------------|
| H  | 1.65964200  | 5.18288900  | 1.02680000  |
| H  | -0.80624400 | 5.73049200  | 0.12491800  |
| H  | -5.21084000 | 2.89410100  | -0.55215800 |
| H  | -5.88584500 | 0.39274800  | 0.20810500  |
| H  | -3.15542000 | -4.02810500 | 1.24375000  |
| H  | -0.57574100 | -4.67733300 | 0.95628100  |
| H  | 3.94774100  | -1.90428400 | 0.72588200  |
| H  | 4.52905300  | 0.67990600  | 1.11833100  |
| Mn | -0.65984600 | 0.53589500  | 0.52882600  |
| Cl | -0.89805600 | 0.74881800  | 2.83929300  |
| O  | -0.58692700 | 0.25022300  | -1.17314700 |
| C  | -3.11276000 | 4.62188400  | -0.62887000 |
| C  | -2.90081300 | 5.20329900  | -1.88194200 |
| C  | -4.01072900 | 5.26300600  | 0.23117300  |
| C  | -3.54983100 | 6.37234100  | -2.27220900 |
| C  | -4.67642800 | 6.42979900  | -0.13823900 |
| C  | -4.44162300 | 6.98628900  | -1.39466200 |
| C  | 1.87048900  | -3.65689800 | 0.54348100  |
| C  | 1.79502000  | -4.45517600 | -0.59989300 |
| C  | 2.65842500  | -4.13310500 | 1.59511500  |
| C  | 2.46927200  | -5.66344900 | -0.71929000 |
| C  | 3.35292900  | -5.33783300 | 1.50113300  |
| C  | 3.25454900  | -6.10573700 | 0.34289000  |
| F  | -4.24931100 | 4.75459000  | 1.44525000  |
| F  | -5.52969800 | 7.02167500  | 0.70331400  |
| F  | -5.07183800 | 8.10505300  | -1.75781600 |
| F  | -3.32860100 | 6.90287000  | -3.47935200 |
| F  | -2.05679800 | 4.63233400  | -2.75485100 |
| F  | 2.76481700  | -3.42404600 | 2.72686300  |
| F  | 1.09150600  | -4.01883800 | -1.67101700 |
| F  | 2.38297300  | -6.37994100 | -1.83767000 |
| F  | 3.92243900  | -7.25447900 | 0.24613900  |
| F  | 4.10571200  | -5.76447600 | 2.52072600  |
| C  | 6.05591900  | -2.62777200 | -1.90046800 |
| C  | 6.02958300  | -1.26732600 | -1.94300700 |
| C  | 4.82914600  | -0.52179200 | -2.20001900 |
| C  | 4.81895600  | -3.38864500 | -2.14712600 |
| H  | 6.94594300  | -0.70886500 | -1.75985800 |
| C  | 3.56384300  | 1.54811900  | -2.37095300 |
| H  | 2.84367600  | -3.15176000 | -2.58176700 |
| C  | 2.36961600  | 0.82558600  | -2.59486800 |
| C  | 2.42077500  | -0.57212900 | -2.62266600 |
| H  | 3.54387900  | 2.62876300  | -2.33976700 |
| C  | 7.29612800  | -3.43610100 | -1.63005200 |

|   |             |             |             |
|---|-------------|-------------|-------------|
| H | 7.05828700  | -4.19464800 | -0.87547000 |
| H | 8.07095100  | -2.78335600 | -1.21249200 |
| C | 1.04674400  | 1.49365200  | -2.77169900 |
| H | 0.35962500  | 1.07919700  | -1.91080700 |
| C | 7.82346800  | -4.14650800 | -2.89069000 |
| H | 8.71735300  | -4.73299900 | -2.65602900 |
| H | 8.08427400  | -3.42097900 | -3.66826700 |
| H | 7.06094400  | -4.82234200 | -3.28456700 |
| C | 0.99002000  | 3.01096400  | -2.77028900 |
| H | 1.51989600  | 3.41984700  | -3.63997600 |
| H | 1.44461900  | 3.43442300  | -1.87300900 |
| H | -0.04485100 | 3.35334000  | -2.81506700 |
| H | 0.51315500  | 1.06865400  | -3.63038200 |
| C | 2.19486800  | 2.35094000  | 1.07265600  |
| C | 3.42233400  | 3.11738900  | 1.42073600  |
| C | 4.04327500  | 2.93709900  | 2.66430200  |
| C | 4.02992600  | 4.01682400  | 0.53814300  |
| C | 5.21164700  | 3.61200500  | 3.01177200  |
| C | 5.19420300  | 4.70690700  | 0.86386000  |
| C | 5.78839600  | 4.50170600  | 2.10740300  |
| F | 3.49349200  | 4.24825400  | -0.67427500 |
| F | 5.74600600  | 5.55647400  | -0.00961700 |
| F | 6.90601100  | 5.15505300  | 2.43014500  |
| F | 5.77895100  | 3.41592800  | 4.20519300  |
| F | 3.51961900  | 2.08943100  | 3.55430200  |
| C | 3.63086800  | -1.24247300 | -2.42901500 |
| H | 1.50322700  | -1.14150800 | -2.74452800 |
| C | 4.76457200  | 0.88398500  | -2.18642000 |
| H | 5.67795600  | 1.44772300  | -2.01448500 |
| N | 3.69238600  | -2.62318900 | -2.41925600 |
| O | 4.74625100  | -4.61925800 | -2.11443700 |
| C | -5.89895800 | -2.50411100 | 1.07465900  |
| C | -7.19230300 | -3.16769100 | 1.12974100  |
| H | -7.80163200 | -2.65662100 | 1.88705200  |
| C | -7.99172400 | -3.26643800 | -0.21169700 |
| H | -8.16296200 | -2.31680300 | -0.72497200 |
| C | -7.22262200 | -4.70769000 | 1.37561900  |
| H | -6.68063900 | -5.06209900 | 2.25358800  |
| C | -8.74919700 | -4.94974000 | 1.39239300  |
| H | -8.99667900 | -5.99345500 | 1.17863900  |
| H | -9.16821800 | -4.70942300 | 2.37426300  |
| C | -9.27822200 | -3.96399800 | 0.29353800  |
| H | -9.80525600 | -4.47761500 | -0.51616700 |
| H | -9.97086400 | -3.23178000 | 0.71933300  |

|   |             |             |             |
|---|-------------|-------------|-------------|
| C | -7.19331000 | -4.30172500 | -1.04187100 |
| H | -7.85450400 | -4.78919400 | -1.76258900 |
| C | -6.67660100 | -5.28557800 | 0.05026700  |
| H | -7.00482600 | -6.32054600 | -0.08487200 |
| C | -5.91923100 | -3.78211800 | -1.77323800 |
| H | -5.78687700 | -2.70336100 | -1.63200800 |
| H | -5.96558000 | -3.98040100 | -2.84982600 |
| C | -5.15555000 | -5.25561500 | -0.05639700 |
| O | -4.37312900 | -5.79675000 | 0.71462900  |
| N | -4.82531400 | -4.52277800 | -1.15806200 |
| H | -3.85563700 | -4.28134000 | -1.31171800 |
| C | -4.84036600 | -1.91480800 | 1.00237500  |

**<sup>3</sup>TS6-R**

|   |             |             |             |
|---|-------------|-------------|-------------|
| N | -0.38910700 | 2.25712000  | -0.44179200 |
| N | -2.59452200 | 0.44538100  | -0.43079900 |
| N | -0.78972200 | -1.72472100 | -0.77321300 |
| N | 1.40006500  | 0.10125600  | -0.79815100 |
| C | 0.71262100  | 2.99908400  | -0.80328300 |
| C | 0.37885200  | 4.39950600  | -0.74503800 |
| C | -0.90214100 | 4.48976600  | -0.29450200 |
| C | -1.39225700 | 3.14500800  | -0.13448900 |
| C | -2.71952300 | 2.82706200  | 0.16575200  |
| C | -3.27628200 | 1.55859600  | -0.00904700 |
| C | -4.68407100 | 1.25290300  | 0.08331800  |
| C | -4.84466800 | -0.03164700 | -0.33542800 |
| C | -3.52561100 | -0.53716000 | -0.63146000 |
| C | -3.25050900 | -1.87437500 | -0.96431800 |
| C | -1.95126600 | -2.41531000 | -0.98393900 |
| C | -1.66074400 | -3.81952200 | -1.10996300 |
| C | -0.31800300 | -3.96448500 | -0.93823100 |
| C | 0.22804100  | -2.64365700 | -0.74337000 |
| C | 1.59392900  | -2.35472600 | -0.64670400 |
| C | 2.12441200  | -1.06467700 | -0.70526100 |
| C | 3.53089400  | -0.75722200 | -0.79514800 |
| C | 3.63484200  | 0.58290100  | -0.99115200 |
| C | 2.29643600  | 1.12115700  | -0.98099000 |
| H | 1.04528400  | 5.20891200  | -1.00057200 |
| H | -1.48465800 | 5.38309700  | -0.12496000 |
| H | -5.45294100 | 1.94118100  | 0.40120100  |
| H | -5.76779600 | -0.58877400 | -0.41143300 |
| H | -2.40461200 | -4.58107400 | -1.29019400 |
| H | 0.26196000  | -4.87463900 | -0.97198400 |
| H | 4.33168000  | -1.47558200 | -0.70930300 |

|    |             |             |             |
|----|-------------|-------------|-------------|
| H  | 4.53707100  | 1.16710900  | -1.08510000 |
| Mn | -0.58557300 | 0.27263800  | -0.57288100 |
| Cl | -0.80347800 | 0.45623900  | -2.88830500 |
| O  | -0.50595100 | -0.00645200 | 1.13006500  |
| C  | -3.61866400 | 3.94255400  | 0.57776300  |
| C  | -3.54320800 | 4.49623900  | 1.85816300  |
| C  | -4.55692400 | 4.48861900  | -0.30405900 |
| C  | -4.36237500 | 5.55059100  | 2.25475900  |
| C  | -5.39073100 | 5.54015900  | 0.07036100  |
| C  | -5.28960100 | 6.07282800  | 1.35476800  |
| C  | 2.53000300  | -3.51032700 | -0.55564800 |
| C  | 2.56244400  | -4.31465000 | 0.58561400  |
| C  | 3.39088600  | -3.86105300 | -1.59963400 |
| C  | 3.40768000  | -5.40980300 | 0.70998900  |
| C  | 4.25608700  | -4.94924100 | -1.50006400 |
| C  | 4.26118600  | -5.72690200 | -0.34416700 |
| F  | -4.66891400 | 3.99925500  | -1.54348600 |
| F  | -6.27787000 | 6.04535800  | -0.79185400 |
| F  | -6.08113500 | 7.08200400  | 1.72305400  |
| F  | -4.26909700 | 6.05834100  | 3.48820400  |
| F  | -2.66861000 | 4.00795000  | 2.75163600  |
| F  | 3.40230200  | -3.14119200 | -2.72940300 |
| F  | 1.79025000  | -3.99253400 | 1.64937000  |
| F  | 3.41603400  | -6.13609000 | 1.82554600  |
| F  | 5.09076300  | -6.76466800 | -0.24253900 |
| F  | 5.07379000  | -5.25659100 | -2.51267300 |
| C  | -5.24817900 | -3.56010500 | -1.30322800 |
| C  | -6.30332300 | -4.55229500 | -1.43769800 |
| H  | -6.22642200 | -4.99514300 | -2.43969900 |
| C  | -6.34526200 | -5.68587500 | -0.36034800 |
| H  | -5.41778000 | -6.25139200 | -0.23990500 |
| C  | -7.77235200 | -4.10400400 | -1.16622100 |
| H  | -8.11942400 | -3.23740800 | -1.73082000 |
| C  | -8.51818200 | -5.42748400 | -1.45164600 |
| H  | -9.49926400 | -5.45230300 | -0.96876400 |
| H  | -8.67986100 | -5.55641900 | -2.52617700 |
| C  | -7.53903700 | -6.51649900 | -0.89090700 |
| H  | -7.99139000 | -7.12566700 | -0.10258800 |
| H  | -7.21160500 | -7.19851100 | -1.68136000 |
| C  | -6.81550700 | -4.95743000 | 0.92314600  |
| H  | -7.31345300 | -5.66514700 | 1.59050400  |
| C  | -7.79276000 | -3.88077900 | 0.36296500  |
| H  | -8.81314900 | -3.95366400 | 0.75119200  |
| C  | -5.73274500 | -4.16693700 | 1.71733900  |

|   |             |             |             |
|---|-------------|-------------|-------------|
| H | -4.74018000 | -4.28159600 | 1.26700500  |
| H | -5.67385300 | -4.50270400 | 2.75861300  |
| C | -7.21719400 | -2.53720000 | 0.79894200  |
| O | -7.62338200 | -1.43645400 | 0.44824200  |
| N | -6.17654800 | -2.78047700 | 1.64600900  |
| H | -5.58643700 | -2.00987800 | 1.92864500  |
| C | 6.48394000  | -1.87722500 | 1.94010800  |
| C | 6.25461100  | -0.53608400 | 1.98772500  |
| C | 4.95391800  | 0.02085100  | 2.23415600  |
| C | 5.37194300  | -2.81511200 | 2.17056500  |
| H | 7.07930500  | 0.15367300  | 1.81669300  |
| C | 3.39191300  | 1.87750300  | 2.39652200  |
| H | 3.37967600  | -2.87742900 | 2.58700200  |
| C | 2.31618300  | 0.98381500  | 2.60295000  |
| C | 2.57537800  | -0.39064600 | 2.62840000  |
| H | 3.21113900  | 2.94307600  | 2.36872700  |
| C | 7.83356300  | -2.49015300 | 1.68014600  |
| H | 7.71900600  | -3.27274700 | 0.92133600  |
| H | 8.50611500  | -1.72736100 | 1.27198500  |
| C | 0.90627400  | 1.44667900  | 2.76178400  |
| H | 0.30131700  | 0.94147900  | 1.88655100  |
| C | 8.44898900  | -3.11859900 | 2.94433400  |
| H | 9.42256800  | -3.56439200 | 2.71740000  |
| H | 8.59119700  | -2.36511500 | 3.72603000  |
| H | 7.79208600  | -3.90199500 | 3.32924900  |
| C | 0.62567800  | 2.93894600  | 2.76878500  |
| H | 1.07667700  | 3.41371400  | 3.64943000  |
| H | 1.02609500  | 3.43287500  | 1.88169300  |
| H | -0.44891200 | 3.12486200  | 2.79976900  |
| H | 0.42793000  | 0.94003200  | 3.60860700  |
| C | 1.98512500  | 2.48345000  | -1.06338300 |
| C | 3.09348300  | 3.42154800  | -1.39039800 |
| C | 3.75220700  | 3.33921500  | -2.62485000 |
| C | 3.55124700  | 4.39547100  | -0.49641800 |
| C | 4.81533400  | 4.17793000  | -2.95281900 |
| C | 4.60781700  | 5.24855100  | -0.80271400 |
| C | 5.24369100  | 5.13756300  | -2.03755300 |
| C | -4.34025700 | -2.76499800 | -1.17554800 |
| F | 2.96895200  | 4.54181600  | 0.70811300  |
| F | 5.01756100  | 6.16505600  | 0.08117800  |
| F | 6.25935000  | 5.94755000  | -2.34156600 |
| F | 5.42254000  | 4.07170600  | -4.13799700 |
| F | 3.37027200  | 2.42868300  | -3.52489200 |
| C | 3.87424500  | -0.87156000 | 2.44732400  |

|   |            |             |            |
|---|------------|-------------|------------|
| H | 1.75189400 | -1.09130500 | 2.73764700 |
| C | 4.68039900 | 1.40129000  | 2.22456500 |
| H | 5.50107200 | 2.09609300  | 2.06530500 |
| N | 4.14150600 | -2.22762900 | 2.43419500 |
| O | 5.48351700 | -4.04290400 | 2.13167200 |

**<sup>5</sup>TS6-S**

|    |             |             |             |
|----|-------------|-------------|-------------|
| N  | 0.14592500  | 2.47028700  | -0.39233600 |
| N  | 2.61536000  | 1.00729300  | -0.37388200 |
| N  | 1.17415600  | -1.40097200 | -0.71199300 |
| N  | -1.28100900 | 0.04671500  | -0.77771200 |
| C  | -1.05621900 | 3.02694700  | -0.75351900 |
| C  | -0.94775500 | 4.46410300  | -0.71876400 |
| C  | 0.30986400  | 4.75822200  | -0.28883400 |
| C  | 0.99672400  | 3.50354400  | -0.11239100 |
| C  | 2.36426700  | 3.39534400  | 0.18242900  |
| C  | 3.10908800  | 2.22800500  | 0.03369400  |
| C  | 4.54456400  | 2.14304000  | 0.16571200  |
| C  | 4.90425800  | 0.88644800  | -0.20694700 |
| C  | 3.68835200  | 0.17922800  | -0.52328900 |
| C  | 3.63180700  | -1.19082400 | -0.84231100 |
| C  | 2.43296000  | -1.91936100 | -0.89127400 |
| C  | 2.36103500  | -3.35224000 | -1.01671200 |
| C  | 1.05199900  | -3.69387600 | -0.86649500 |
| C  | 0.30379600  | -2.47446300 | -0.69648500 |
| C  | -1.08725000 | -2.40444600 | -0.63119300 |
| C  | -1.81747300 | -1.21093400 | -0.70185300 |
| C  | -3.25406000 | -1.13176400 | -0.80673700 |
| C  | -3.56473500 | 0.17891300  | -0.98311100 |
| C  | -2.32440000 | 0.91811100  | -0.95304300 |
| H  | -1.73308400 | 5.15676300  | -0.97950900 |
| H  | 0.75029300  | 5.73328300  | -0.14314700 |
| H  | 5.18740500  | 2.94990200  | 0.48426800  |
| H  | 5.89101000  | 0.45035800  | -0.25067100 |
| H  | 3.19705700  | -4.01574800 | -1.18670600 |
| H  | 0.62487100  | -4.68456900 | -0.90660200 |
| H  | -3.93216000 | -1.96839200 | -0.73799500 |
| H  | -4.54655500 | 0.61636000  | -1.07642600 |
| Mn | 0.67358000  | 0.51009700  | -0.54914300 |
| Cl | 0.80836500  | 0.83819400  | -2.85561600 |
| O  | 0.59299400  | 0.26832900  | 1.18760100  |
| C  | 3.07871900  | 4.64452400  | 0.57197100  |
| C  | 2.87516100  | 5.23367000  | 1.82289600  |
| C  | 3.95738700  | 5.28929900  | -0.30507600 |

|   |             |             |             |
|---|-------------|-------------|-------------|
| C | 3.51511000  | 6.41348600  | 2.19519300  |
| C | 4.61308000  | 6.46730100  | 0.04618900  |
| C | 4.38775800  | 7.03109700  | 1.30106600  |
| C | -1.83216800 | -3.69286700 | -0.55886500 |
| C | -1.76596600 | -4.49496600 | 0.58215400  |
| C | -2.60209300 | -4.17032300 | -1.62336900 |
| C | -2.43302100 | -5.70860300 | 0.68718700  |
| C | -3.28753300 | -5.38106800 | -1.54447100 |
| C | -3.19906100 | -6.15287700 | -0.38791600 |
| F | 4.18664400  | 4.77397500  | -1.51800500 |
| F | 5.44796000  | 7.06260600  | -0.81122100 |
| F | 5.00891100  | 8.16029900  | 1.64699900  |
| F | 3.30328600  | 6.95111200  | 3.40079800  |
| F | 2.04931500  | 4.65966900  | 2.71038700  |
| F | -2.69821400 | -3.45653500 | -2.75295300 |
| F | -1.07879600 | -4.05855100 | 1.66358400  |
| F | -2.35859900 | -6.42850800 | 1.80415600  |
| F | -3.85924500 | -7.30737500 | -0.30513600 |
| F | -4.02213600 | -5.80977800 | -2.57628700 |
| C | -6.02042800 | -2.63149000 | 1.85707800  |
| C | -6.00171200 | -1.27109000 | 1.92224500  |
| C | -4.80802800 | -0.52467500 | 2.19942100  |
| C | -4.78063500 | -3.38948600 | 2.09932700  |
| H | -6.92006200 | -0.71473600 | 1.74275400  |
| C | -3.55860400 | 1.54974200  | 2.42036100  |
| H | -2.80880600 | -3.14972900 | 2.54690000  |
| C | -2.35838200 | 0.83082600  | 2.63570600  |
| C | -2.40203700 | -0.56935800 | 2.63606800  |
| H | -3.54490900 | 2.63066700  | 2.41545700  |
| C | -7.25455200 | -3.44145700 | 1.56630300  |
| H | -7.00781800 | -4.18796700 | 0.80263200  |
| H | -8.02976100 | -2.78645700 | 1.15307900  |
| C | -1.04211200 | 1.50003300  | 2.81811500  |
| H | -0.35443700 | 1.08500300  | 1.95120400  |
| C | -7.78692900 | -4.17279700 | 2.81301800  |
| H | -8.67630700 | -4.75994800 | 2.56345900  |
| H | -8.05657900 | -3.45999200 | 3.59926300  |
| H | -7.02376500 | -4.85065500 | 3.20210000  |
| C | -0.98840000 | 3.01780900  | 2.82409400  |
| H | -1.50649300 | 3.42844800  | 3.70039500  |
| H | -1.45212500 | 3.44332400  | 1.93216500  |
| H | 0.04721200  | 3.36025900  | 2.85565400  |
| H | -0.50749500 | 1.06998500  | 3.67400700  |
| C | -2.23148300 | 2.31304400  | -1.01767400 |



|   |             |             |             |
|---|-------------|-------------|-------------|
| C | -3.47002200 | 3.06642900  | -1.35681000 |
| C | -4.09877600 | 2.87643000  | -2.59544100 |
| C | -4.07708000 | 3.96699400  | -0.47470900 |
| C | -5.27536700 | 3.54000300  | -2.93672100 |
| C | -5.25036400 | 4.64460500  | -0.79428700 |
| C | -5.85304600 | 4.42838600  | -2.03176900 |
| F | -3.53204500 | 4.21321100  | 0.73037100  |
| F | -5.80184600 | 5.49411400  | 0.07940000  |
| F | -6.97881400 | 5.07044000  | -2.34844500 |
| F | -5.84958200 | 3.33421900  | -4.12515900 |
| F | -3.57449800 | 2.03175500  | -3.48768500 |
| C | -3.60584500 | -1.24245300 | 2.42414900  |
| H | -1.48016200 | -1.13352900 | 2.74890300  |
| C | -4.75270700 | 0.88297800  | 2.21469300  |
| H | -5.66948700 | 1.44362200  | 2.05071800  |
| N | -3.65968200 | -2.62317800 | 2.38875000  |
| O | -4.70284400 | -4.61932500 | 2.04864100  |
| C | 5.92636600  | -2.46912700 | -1.05794400 |
| C | 7.22454000  | -3.12340200 | -1.10533200 |
| H | 7.82589300  | -2.62335000 | -1.87626100 |
| C | 8.03159500  | -3.18769100 | 0.23378200  |
| H | 8.19798900  | -2.22617100 | 0.72604700  |
| C | 7.26536900  | -4.66800300 | -1.31887500 |
| H | 6.72172000  | -5.04486500 | -2.18640100 |
| C | 8.79365500  | -4.89884400 | -1.33840400 |
| H | 9.05007700  | -5.93579600 | -1.10341100 |
| H | 9.20585300  | -4.67676300 | -2.32742100 |
| C | 9.32078400  | -3.88563600 | -0.26389400 |
| H | 9.85642000  | -4.37756100 | 0.55356800  |
| H | 10.00507900 | -3.15718700 | -0.70918600 |
| C | 7.24576200  | -4.21154700 | 1.08973500  |
| H | 7.91483200  | -4.67907000 | 1.81634200  |
| C | 6.73015200  | -5.22155000 | 0.02115900  |
| H | 7.06600900  | -6.25125900 | 0.17621900  |
| C | 5.97219600  | -3.68633500 | 1.81784200  |
| H | 5.83142900  | -2.61150000 | 1.65616500  |
| H | 6.02567200  | -3.86285600 | 2.89784000  |
| C | 5.20943900  | -5.19945800 | 0.13533900  |
| O | 4.42662400  | -5.76121900 | -0.62052200 |
| N | 4.88017800  | -4.44645600 | 1.22341600  |
| H | 3.90964300  | -4.21047600 | 1.37998400  |
| C | 4.86246800  | -1.88806100 | -0.99374800 |

|    |             |             |             |
|----|-------------|-------------|-------------|
| N  | -0.37748200 | 2.25544600  | -0.42428200 |
| N  | -2.59516900 | 0.43559500  | -0.45251100 |
| N  | -0.80190700 | -1.72453200 | -0.76386600 |
| N  | 1.40501100  | 0.07901900  | -0.78443800 |
| C  | 0.73143000  | 2.99058500  | -0.76577600 |
| C  | 0.40597800  | 4.39483700  | -0.71821800 |
| C  | -0.88487400 | 4.49055900  | -0.29714900 |
| C  | -1.37586900 | 3.14409100  | -0.14150000 |
| C  | -2.71490200 | 2.82612500  | 0.13532900  |
| C  | -3.27429000 | 1.56431700  | -0.04292500 |
| C  | -4.68463000 | 1.26652300  | 0.04674900  |
| C  | -4.85244800 | -0.01994000 | -0.35898500 |
| C  | -3.53439600 | -0.53655800 | -0.64435400 |
| C  | -3.26262400 | -1.87989000 | -0.95839500 |
| C  | -1.96522400 | -2.42189600 | -0.96054200 |
| C  | -1.67722600 | -3.82754300 | -1.06479200 |
| C  | -0.33480600 | -3.97356400 | -0.89612300 |
| C  | 0.21881300  | -2.65410400 | -0.72614200 |
| C  | 1.58255000  | -2.37401200 | -0.64217600 |
| C  | 2.12478800  | -1.08367000 | -0.70368900 |
| C  | 3.53339600  | -0.78790500 | -0.79416600 |
| C  | 3.64372400  | 0.55536800  | -0.96805500 |
| C  | 2.30604700  | 1.09775400  | -0.95033200 |
| H  | 1.07996700  | 5.20119100  | -0.96318800 |
| H  | -1.46923800 | 5.38560400  | -0.14428100 |
| H  | -5.45040900 | 1.96154900  | 0.35694800  |
| H  | -5.77865800 | -0.57229900 | -0.43233000 |
| H  | -2.42307400 | -4.59000800 | -1.23248700 |
| H  | 0.24072900  | -4.88679500 | -0.91747700 |
| H  | 4.33012900  | -1.51185000 | -0.71889000 |
| H  | 4.54902100  | 1.13622300  | -1.05197600 |
| Mn | -0.60238900 | 0.24265500  | -0.58987700 |
| Cl | -0.73802300 | 0.54839700  | -2.90045200 |
| O  | -0.52145000 | 0.01776200  | 1.14814300  |
| C  | -3.61405900 | 3.94698500  | 0.53314700  |
| C  | -3.53836400 | 4.51525000  | 1.80728100  |
| C  | -4.54773600 | 4.48704700  | -0.35722400 |
| C  | -4.35447200 | 5.57701200  | 2.19001000  |
| C  | -5.37792900 | 5.54619000  | 0.00348600  |
| C  | -5.27757800 | 6.09281200  | 1.28203800  |
| C  | 2.51424000  | -3.53403200 | -0.55920000 |
| C  | 2.56047200  | -4.33540000 | 0.58343300  |
| C  | 3.36028300  | -3.88822600 | -1.61414500 |
| C  | 3.40566900  | -5.43166300 | 0.69857400  |

|   |             |             |             |
|---|-------------|-------------|-------------|
| C | 4.22398800  | -4.97828400 | -1.52441600 |
| C | 4.24332600  | -5.75321500 | -0.36675000 |
| F | -4.65884300 | 3.98479900  | -1.59156900 |
| F | -6.26088100 | 6.04526200  | -0.86653500 |
| F | -6.06597700 | 7.10908000  | 1.63716700  |
| F | -4.26206400 | 6.09823700  | 3.41780000  |
| F | -2.66710500 | 4.03406200  | 2.70712800  |
| F | 3.35730700  | -3.17015000 | -2.74496700 |
| F | 1.80210000  | -4.01027400 | 1.65591100  |
| F | 3.42916700  | -6.15481300 | 1.81591000  |
| F | 5.07220700  | -6.79250000 | -0.27412800 |
| F | 5.02675700  | -5.28992500 | -2.54749500 |
| C | 6.47485100  | -1.86058100 | 1.89451500  |
| C | 6.24582200  | -0.51920000 | 1.95556500  |
| C | 4.94931800  | 0.03458400  | 2.22220200  |
| C | 5.36543900  | -2.80028200 | 2.13093400  |
| H | 7.06849900  | 0.17190000  | 1.78037100  |
| C | 3.39235400  | 1.89108400  | 2.42534600  |
| H | 3.37814600  | -2.86680300 | 2.56887500  |
| C | 2.31578200  | 0.99594800  | 2.63471600  |
| C | 2.57587800  | -0.38057200 | 2.64252800  |
| H | 3.21154300  | 2.95676100  | 2.41568900  |
| C | 7.82129600  | -2.47077200 | 1.61431100  |
| H | 7.69796800  | -3.24890900 | 0.85230800  |
| H | 8.48846200  | -1.70504600 | 1.20289300  |
| C | 0.91061300  | 1.45457800  | 2.80226600  |
| H | 0.30307600  | 0.94525600  | 1.92460800  |
| C | 8.45226500  | -3.10671400 | 2.86727100  |
| H | 9.42335100  | -3.55017100 | 2.62566600  |
| H | 8.60328600  | -2.35804500 | 3.65190000  |
| H | 7.80056900  | -3.89305400 | 3.25498900  |
| C | 0.62487100  | 2.94632600  | 2.81354900  |
| H | 1.06446400  | 3.42620200  | 3.69753600  |
| H | 1.02753400  | 3.44333400  | 1.92894000  |
| H | -0.45128100 | 3.12625900  | 2.83463800  |
| H | 0.43752400  | 0.94293900  | 3.64939800  |
| C | 2.00312700  | 2.46399800  | -1.01686300 |
| C | 3.11747400  | 3.39664400  | -1.34114400 |
| C | 3.78071000  | 3.30698200  | -2.57307600 |
| C | 3.57258900  | 4.37585200  | -0.45141200 |
| C | 4.84721400  | 4.14135600  | -2.90092900 |
| C | 4.63358100  | 5.22351200  | -0.75755000 |
| C | 5.27477900  | 5.10420600  | -1.98877500 |
| F | 2.98427800  | 4.53374400  | 0.74821600  |

|   |             |             |             |
|---|-------------|-------------|-------------|
| F | 5.04148400  | 6.14391800  | 0.12305400  |
| F | 6.29404000  | 5.90960200  | -2.29253500 |
| F | 5.45839400  | 4.02773200  | -4.08332300 |
| F | 3.39939000  | 2.39501400  | -3.47163200 |
| C | 3.87091200  | -0.85972100 | 2.44172300  |
| H | 1.75195800  | -1.08059900 | 2.75244200  |
| C | 4.67686000  | 1.41672700  | 2.23163100  |
| H | 5.49697000  | 2.11212600  | 2.07183900  |
| N | 4.13819800  | -2.21568900 | 2.41251700  |
| O | 5.47805700  | -4.02772900 | 2.08185900  |
| C | -5.26387800 | -3.56476100 | -1.27412900 |
| C | -6.32198800 | -4.55529600 | -1.39442300 |
| H | -6.24249300 | -5.01635400 | -2.38799200 |
| C | -6.37161700 | -5.66941300 | -0.29701500 |
| H | -5.44642900 | -6.23562900 | -0.16304600 |
| C | -7.79055500 | -4.09743100 | -1.13652700 |
| H | -8.13262100 | -3.23988500 | -1.71774200 |
| C | -8.53944300 | -5.42344100 | -1.40145100 |
| H | -9.52246800 | -5.43652400 | -0.92212200 |
| H | -8.69731700 | -5.57093300 | -2.47415500 |
| C | -7.56604600 | -6.50540600 | -0.81756600 |
| H | -8.02341100 | -7.09890500 | -0.02026500 |
| H | -7.23777800 | -7.20248100 | -1.59440600 |
| C | -6.84439600 | -4.91670000 | 0.97140300  |
| H | -7.34716800 | -5.61093900 | 1.64919100  |
| C | -7.81598000 | -3.84707100 | 0.38838900  |
| H | -8.83806500 | -3.90974000 | 0.77387200  |
| C | -5.76219300 | -4.11569300 | 1.75575000  |
| H | -4.76801500 | -4.24222800 | 1.31214600  |
| H | -5.70896200 | -4.43250900 | 2.80322000  |
| C | -7.23765400 | -2.49773200 | 0.80254300  |
| O | -7.63927500 | -1.40224200 | 0.43073100  |
| N | -6.20047100 | -2.72922100 | 1.65696100  |
| H | -5.60994100 | -1.95564900 | 1.93053200  |
| C | -4.35325700 | -2.77054500 | -1.15820100 |

**<sup>3</sup>TS7-S**

|   |             |             |             |
|---|-------------|-------------|-------------|
| N | -0.66047800 | 2.23401500  | 0.30512000  |
| N | 1.28023000  | 0.18700100  | 0.17253600  |
| N | -0.75982200 | -1.71848300 | -0.17065100 |
| N | -2.71920600 | 0.30103900  | 0.02592900  |
| C | -1.72058100 | 3.04464800  | 0.60673600  |
| C | -1.27075500 | 4.41631400  | 0.65118800  |
| C | 0.05251700  | 4.41604900  | 0.32914100  |
| C | 0.43974900  | 3.04052800  | 0.14154000  |

|    |             |             |             |
|----|-------------|-------------|-------------|
| C  | 1.75235200  | 2.59641600  | -0.01670100 |
| C  | 2.13553600  | 1.25658200  | 0.09418400  |
| C  | 3.48999500  | 0.80145500  | 0.29634800  |
| C  | 3.42498100  | -0.53822000 | 0.54077000  |
| C  | 2.04092500  | -0.91707900 | 0.43432200  |
| C  | 1.56285800  | -2.23723000 | 0.48070100  |
| C  | 0.25538800  | -2.59647500 | 0.11398200  |
| C  | -0.19270000 | -3.93998000 | -0.12544900 |
| C  | -1.46693400 | -3.85626000 | -0.60508000 |
| C  | -1.83816400 | -2.46523500 | -0.58567200 |
| C  | -3.13164800 | -1.97750500 | -0.79836400 |
| C  | -3.54390600 | -0.69248500 | -0.43007700 |
| C  | -4.91508200 | -0.24553600 | -0.34986200 |
| C  | -4.89732300 | 0.99728200  | 0.20052200  |
| C  | -3.51086400 | 1.36038600  | 0.38834500  |
| H  | -1.89988100 | 5.26619100  | 0.87066200  |
| H  | 0.72303200  | 5.26025700  | 0.25905600  |
| H  | 4.36651100  | 1.43126200  | 0.25635900  |
| H  | 4.23368300  | -1.22839900 | 0.72730900  |
| H  | 0.39441600  | -4.82128300 | 0.07753900  |
| H  | -2.12686800 | -4.66808700 | -0.87213300 |
| H  | -5.77768100 | -0.82461300 | -0.64217600 |
| H  | -5.74233700 | 1.62831500  | 0.42991400  |
| Mn | -0.71499600 | 0.24383200  | 0.03105700  |
| Cl | -0.78908100 | -0.03413000 | 2.38913400  |
| O  | -0.69044500 | 0.56199500  | -1.66123300 |
| C  | 2.84078300  | 3.59659600  | -0.21587100 |
| C  | 3.25570000  | 3.94582000  | -1.49957600 |
| C  | 3.54303200  | 4.15332000  | 0.85534800  |
| C  | 4.34413700  | 4.77638200  | -1.73521100 |
| C  | 4.62659900  | 5.00522400  | 0.65158100  |
| C  | 5.02823400  | 5.31395700  | -0.64768100 |
| C  | -4.12669800 | -2.92269500 | -1.37483600 |
| C  | -4.01773500 | -3.32769500 | -2.70912200 |
| C  | -5.17356200 | -3.46561000 | -0.62415300 |
| C  | -4.90994600 | -4.22950100 | -3.28211100 |
| C  | -6.08400100 | -4.36419300 | -1.17689700 |
| C  | -5.94840400 | -4.74815000 | -2.50997000 |
| F  | 3.19080000  | 3.85112800  | 2.11135400  |
| F  | 5.28606300  | 5.52446200  | 1.69219600  |
| F  | 6.07028400  | 6.12175100  | -0.84712400 |
| F  | 4.72769400  | 5.05730800  | -2.97977000 |
| F  | 2.61659100  | 3.42179400  | -2.57233100 |
| F  | -5.32355700 | -3.12054400 | 0.66012800  |

|   |             |             |             |
|---|-------------|-------------|-------------|
| F | -3.02790400 | -2.84339100 | -3.47830200 |
| F | -4.78126100 | -4.59575400 | -4.56146200 |
| F | -6.81293300 | -5.61051700 | -3.04781200 |
| F | -7.07808300 | -4.86523600 | -0.43762300 |
| C | 3.06394700  | -4.05456000 | 1.61037400  |
| C | 3.67455100  | -4.96145400 | 2.56412400  |
| H | 4.53507500  | -5.46873500 | 2.10891300  |
| C | 4.08307300  | -4.33042700 | 3.93834600  |
| H | 4.78339200  | -3.49360700 | 3.87802600  |
| C | 2.70588100  | -5.99693300 | 3.21766100  |
| H | 2.15159400  | -6.63287100 | 2.52522300  |
| C | 3.68908800  | -6.73401500 | 4.15675500  |
| H | 3.16721700  | -7.22823000 | 4.98125000  |
| H | 4.24286600  | -7.50509800 | 3.61195900  |
| C | 4.64373600  | -5.58915800 | 4.64488400  |
| H | 4.64635300  | -5.47612400 | 5.73299000  |
| H | 5.67632800  | -5.77743100 | 4.33464700  |
| C | 2.73050800  | -3.98462100 | 4.61536600  |
| H | 2.85272800  | -4.01642500 | 5.70100600  |
| C | 1.79301300  | -5.11263800 | 4.09473900  |
| H | 1.33382800  | -5.71019000 | 4.88870300  |
| N | 0.77005600  | -3.06129900 | 3.62208700  |
| H | 0.15178200  | -2.38680900 | 3.18045800  |
| C | 6.17600700  | -0.23788400 | -2.09335200 |
| C | 5.50709100  | -1.41552500 | -2.23190300 |
| C | 4.11911200  | -1.47768400 | -2.60396100 |
| C | 5.47373800  | 1.03281600  | -2.35060100 |
| H | 6.01142000  | -2.35568800 | -2.02509700 |
| C | 2.00679100  | -2.64560100 | -2.87659700 |
| H | 3.69918600  | 1.78753000  | -2.98729900 |
| C | 1.34593300  | -1.42751000 | -3.15310300 |
| C | 2.08462600  | -0.24287000 | -3.17314000 |
| H | 1.42900700  | -3.56367200 | -2.83844100 |
| C | 7.60838000  | -0.09542500 | -1.64979000 |
| H | 8.14684000  | 0.46951400  | -2.42221700 |
| H | 7.62189000  | 0.56934500  | -0.77619100 |
| C | -0.13254900 | -1.37388400 | -3.32068500 |
| H | -0.60539900 | -2.33370200 | -3.10191100 |
| H | -0.49364200 | -0.63853500 | -2.47784200 |
| C | -0.67500500 | -0.75937800 | -4.60698300 |
| H | -1.76702700 | -0.72445900 | -4.57455300 |
| H | -0.30136800 | 0.25755600  | -4.75624500 |
| H | -0.37531600 | -1.36099800 | -5.47357700 |
| C | 8.33961000  | -1.40052500 | -1.33808100 |

|   |             |             |             |
|---|-------------|-------------|-------------|
| H | 9.36694000  | -1.19569600 | -1.02400600 |
| H | 7.84870200  | -1.95350500 | -0.52936000 |
| H | 8.38472000  | -2.05687400 | -2.21403000 |
| C | 2.43593100  | -3.25075000 | 0.95346700  |
| C | -3.05655700 | 2.63922000  | 0.72371900  |
| C | -4.05181100 | 3.67377600  | 1.12301600  |
| C | -4.07476700 | 4.17024700  | 2.43089700  |
| C | -4.96981100 | 4.21164600  | 0.21590600  |
| C | -4.98008300 | 5.15274000  | 2.82703100  |
| C | -5.88883100 | 5.18864800  | 0.59092200  |
| C | -5.89090900 | 5.66079900  | 1.90240500  |
| F | -4.98255000 | 3.78522800  | -1.05494100 |
| F | -6.75837100 | 5.68177900  | -0.29764300 |
| F | -6.76434000 | 6.59992800  | 2.27180700  |
| F | -4.98256700 | 5.60828000  | 4.08359200  |
| F | -3.20787800 | 3.70480700  | 3.33560300  |
| C | 3.45215200  | -0.26179000 | -2.89324700 |
| C | 3.36797400  | -2.66887400 | -2.62251700 |
| H | 3.86513900  | -3.60638300 | -2.38958500 |
| H | 1.57949300  | 0.70802900  | -3.31141800 |
| N | 4.17722700  | 0.91025500  | -2.82221600 |
| O | 5.96920800  | 2.14748000  | -2.16169000 |
| C | 0.65851800  | -4.39169600 | 3.35639500  |
| C | 2.03309700  | -2.64899900 | 4.21719000  |
| H | 1.86026200  | -2.01007700 | 5.08961300  |
| H | 2.63228900  | -2.07518400 | 3.49942000  |
| O | -0.20267900 | -4.93779800 | 2.67776700  |

**<sup>3</sup>TS7-R**

|   |             |             |             |
|---|-------------|-------------|-------------|
| N | 0.86324200  | 2.12072100  | 0.23294100  |
| N | -1.16123800 | 0.14927800  | 0.09622600  |
| N | 0.80168300  | -1.84792900 | -0.12501200 |
| N | 2.83446200  | 0.08771700  | 0.08402900  |
| C | 1.94016000  | 2.89169600  | 0.58744500  |
| C | 1.52749700  | 4.27556500  | 0.65110800  |
| C | 0.22212900  | 4.32411200  | 0.27090900  |
| C | -0.20148100 | 2.96426300  | 0.04166900  |
| C | -1.52388000 | 2.57020100  | -0.16518600 |
| C | -1.96721900 | 1.25022500  | -0.03891000 |
| C | -3.34525300 | 0.86254600  | 0.15042300  |
| C | -3.34677800 | -0.46381000 | 0.45507500  |
| C | -1.97867000 | -0.91051000 | 0.38579300  |
| C | -1.55806300 | -2.24440000 | 0.48549700  |
| C | -0.25723000 | -2.66945700 | 0.15398400  |

|    |             |             |             |
|----|-------------|-------------|-------------|
| C  | 0.13202800  | -4.03440800 | -0.05219800 |
| C  | 1.42545300  | -4.02015800 | -0.49583100 |
| C  | 1.85601700  | -2.64759900 | -0.49986200 |
| C  | 3.17196600  | -2.21527700 | -0.70436800 |
| C  | 3.62755600  | -0.93872000 | -0.36293500 |
| C  | 5.00980800  | -0.52623000 | -0.31216000 |
| C  | 5.03095100  | 0.73093700  | 0.20770700  |
| C  | 3.65751100  | 1.12827400  | 0.41581200  |
| H  | 2.16376400  | 5.10121800  | 0.93124400  |
| H  | -0.41868800 | 5.19034300  | 0.19424000  |
| H  | -4.19045800 | 1.53154900  | 0.08975300  |
| H  | -4.18276800 | -1.09387400 | 0.70934800  |
| H  | -0.51999500 | -4.88189000 | 0.10119900  |
| H  | 2.04965600  | -4.86451600 | -0.74937600 |
| H  | 5.85276200  | -1.13122200 | -0.61021300 |
| H  | 5.89128200  | 1.35662900  | 0.39341500  |
| Mn | 0.83037600  | 0.12361200  | 0.02037100  |
| Cl | 0.80349100  | -0.07796600 | 2.38906800  |
| O  | 0.88117700  | 0.38170800  | -1.68088100 |
| C  | -2.56515000 | 3.60827300  | -0.41528200 |
| C  | -2.97389800 | 3.90028400  | -1.71513100 |
| C  | -3.23430300 | 4.25598800  | 0.62576900  |
| C  | -4.03038000 | 4.75829200  | -1.99360300 |
| C  | -4.28377700 | 5.13857200  | 0.37768000  |
| C  | -4.68425500 | 5.38490400  | -0.93533600 |
| C  | 4.13799700  | -3.20907600 | -1.24683200 |
| C  | 4.02922300  | -3.64550700 | -2.57143100 |
| C  | 5.16146300  | -3.76342900 | -0.47238900 |
| C  | 4.89936100  | -4.58839900 | -3.11180100 |
| C  | 6.04926300  | -4.70325600 | -0.99224700 |
| C  | 5.91460400  | -5.11766400 | -2.31630900 |
| F  | -2.88043200 | 4.01756300  | 1.89389100  |
| F  | -4.91172600 | 5.74695700  | 1.38857300  |
| F  | -5.69367000 | 6.22238900  | -1.17630300 |
| F  | -4.40875700 | 4.98463500  | -3.25083100 |
| F  | -2.35663500 | 3.29790900  | -2.75973700 |
| F  | 5.30867900  | -3.39165400 | 0.80521800  |
| F  | 3.06359600  | -3.15103300 | -3.36356800 |
| F  | 4.77161600  | -4.98391800 | -4.38229700 |
| F  | 6.75697000  | -6.02004400 | -2.82254400 |
| F  | 7.01963900  | -5.21587700 | -0.22941200 |
| C  | -3.17029700 | -3.95301200 | 1.63380400  |
| C  | -3.91986300 | -4.73868300 | 2.59619700  |
| H  | -4.45142800 | -5.55265600 | 2.08620200  |



|   |             |             |             |
|---|-------------|-------------|-------------|
| C | -4.89456100 | -3.93576000 | 3.51409800  |
| H | -5.63752900 | -3.32358200 | 2.99991200  |
| C | -3.09506900 | -5.30389300 | 3.80202900  |
| H | -2.24827900 | -5.93938800 | 3.53094700  |
| C | -4.22535800 | -6.03156800 | 4.57104300  |
| H | -3.96811200 | -6.18161400 | 5.62371400  |
| H | -4.41255800 | -7.01901600 | 4.13766700  |
| C | -5.46186500 | -5.08577000 | 4.37854500  |
| H | -5.86365300 | -4.71827600 | 5.32714900  |
| H | -6.27523200 | -5.59983000 | 3.85673500  |
| C | -3.93707800 | -3.11089600 | 4.40156900  |
| H | -4.44005200 | -2.80903000 | 5.32569100  |
| C | -2.71255200 | -4.04504400 | 4.62396000  |
| H | -2.58944000 | -4.32366800 | 5.67362400  |
| C | -3.37106200 | -1.84081400 | 3.75644200  |
| N | -2.01284900 | -1.91324900 | 3.81643800  |
| H | -1.43192800 | -1.20186000 | 3.38241800  |
| C | -6.05385600 | -0.17894200 | -2.19750700 |
| C | -5.42201000 | -1.38177700 | -2.28078200 |
| C | -4.03560700 | -1.50387100 | -2.64368500 |
| C | -5.31261700 | 1.05597300  | -2.51421100 |
| H | -5.95484100 | -2.29487100 | -2.02951200 |
| C | -1.95939800 | -2.74806000 | -2.84517200 |
| H | -3.51145700 | 1.72599700  | -3.16787600 |
| C | -1.25558600 | -1.56361200 | -3.16044300 |
| C | -1.95663400 | -0.35857900 | -3.24028400 |
| H | -1.41206200 | -3.68196400 | -2.76479000 |
| C | -7.47869300 | 0.02841100  | -1.75648700 |
| H | -8.00489700 | 0.56914800  | -2.55437000 |
| H | -7.46586200 | 0.73612800  | -0.91749900 |
| C | 0.22607700  | -1.56541600 | -3.30416200 |
| H | 0.65933300  | -2.53739300 | -3.05795600 |
| H | 0.60419400  | -0.82876300 | -2.47245400 |
| C | 0.81175000  | -1.00051800 | -4.59458200 |
| H | 1.90372300  | -1.00667600 | -4.54485000 |
| H | 0.48137700  | 0.02692200  | -4.77095200 |
| H | 0.50231100  | -1.60810700 | -5.45346300 |
| C | -8.24524300 | -1.23674200 | -1.37339700 |
| H | -9.26404800 | -0.98539500 | -1.06546300 |
| H | -7.76507500 | -1.75898200 | -0.53841500 |
| H | -8.31521100 | -1.93672500 | -2.21335900 |
| C | -2.47655500 | -3.21113700 | 0.97002300  |
| C | 3.25235000  | 2.43126500  | 0.73525900  |
| C | 4.31105400  | 3.39531800  | 1.14484500  |

|   |             |             |             |
|---|-------------|-------------|-------------|
| C | 4.96663300  | 3.25098700  | 2.37281400  |
| C | 4.71665800  | 4.45046300  | 0.32147000  |
| C | 5.97505500  | 4.12500200  | 2.77379600  |
| C | 5.71690500  | 5.34064500  | 0.70448100  |
| C | 6.34852300  | 5.17428000  | 1.93586600  |
| F | 4.13757200  | 4.62662800  | -0.87463400 |
| F | 6.08157400  | 6.34258400  | -0.10292000 |
| F | 7.31146700  | 6.01875500  | 2.31118200  |
| F | 6.58312700  | 3.96616400  | 3.95344100  |
| F | 4.63237400  | 2.25017300  | 3.19335700  |
| C | -3.32788600 | -0.32316100 | -2.97948200 |
| C | -3.32294800 | -2.71784100 | -2.60559100 |
| H | -3.85222800 | -3.62821300 | -2.33836800 |
| H | -1.42129600 | 0.57014200  | -3.41207300 |
| N | -4.01759000 | 0.87138400  | -2.97134000 |
| O | -5.77424600 | 2.19286000  | -2.38565300 |
| C | -1.47284300 | -3.21999600 | 4.16329800  |
| H | -0.72949500 | -3.13233200 | 4.96280200  |
| H | -0.97758700 | -3.67847500 | 3.29862300  |
| O | -4.04142500 | -0.92357800 | 3.29956600  |

**<sup>5</sup>TS7-s**

|   |             |             |             |
|---|-------------|-------------|-------------|
| N | -0.67913100 | 2.21252000  | 0.32419200  |
| N | 1.28181600  | 0.18766200  | 0.20366900  |
| N | -0.75329100 | -1.74189800 | -0.17143300 |
| N | -2.73278500 | 0.28335300  | 0.09348300  |
| C | -1.74524900 | 3.03276700  | 0.59760200  |
| C | -1.29930700 | 4.40529100  | 0.61489500  |
| C | 0.02798800  | 4.40406700  | 0.31347900  |
| C | 0.42717700  | 3.02918500  | 0.16560400  |
| C | 1.74158000  | 2.59598700  | 0.03997600  |
| C | 2.13400100  | 1.25471900  | 0.15237400  |
| C | 3.49190600  | 0.80481800  | 0.33880400  |
| C | 3.43442900  | -0.54321100 | 0.53310100  |
| C | 2.05001100  | -0.92359800 | 0.41863500  |
| C | 1.58623900  | -2.24811000 | 0.41266800  |
| C | 0.27261000  | -2.61417400 | 0.05568700  |
| C | -0.16551800 | -3.95994000 | -0.19851400 |
| C | -1.45837400 | -3.87773600 | -0.62436900 |
| C | -1.83438200 | -2.48649200 | -0.56361900 |
| C | -3.13916500 | -2.00369200 | -0.72388100 |
| C | -3.55516700 | -0.72597900 | -0.33697300 |
| C | -4.93035900 | -0.29132000 | -0.24256100 |
| C | -4.91776200 | 0.96210900  | 0.28138300  |

|    |             |             |             |
|----|-------------|-------------|-------------|
| C  | -3.53130700 | 1.33912000  | 0.44087900  |
| H  | -1.93364700 | 5.25759500  | 0.80829700  |
| H  | 0.69482700  | 5.25027700  | 0.23465700  |
| H  | 4.36461900  | 1.44048800  | 0.31444500  |
| H  | 4.24718200  | -1.23587100 | 0.69005600  |
| H  | 0.43585900  | -4.83969200 | -0.03446600 |
| H  | -2.12294400 | -4.68959600 | -0.87941200 |
| H  | -5.79142400 | -0.88302700 | -0.51289900 |
| H  | -5.76494100 | 1.59077000  | 0.50909000  |
| Mn | -0.72862700 | 0.25174100  | 0.08527200  |
| Cl | -0.77518000 | -0.16386100 | 2.42586000  |
| O  | -0.73863900 | 0.51399300  | -1.64375800 |
| C  | 2.82277700  | 3.60589400  | -0.14845600 |
| C  | 3.19468300  | 4.01677700  | -1.42714700 |
| C  | 3.55543900  | 4.11725600  | 0.92501600  |
| C  | 4.26711900  | 4.86952800  | -1.65682800 |
| C  | 4.62540500  | 4.98746100  | 0.72756900  |
| C  | 4.98123100  | 5.36226000  | -0.56757000 |
| C  | -4.13941900 | -2.94723600 | -1.29485300 |
| C  | -4.04723600 | -3.33385900 | -2.63606900 |
| C  | -5.17145100 | -3.50584600 | -0.53568600 |
| C  | -4.94327900 | -4.23287500 | -3.20742000 |
| C  | -6.08465300 | -4.40267100 | -1.08666200 |
| C  | -5.96690300 | -4.76794000 | -2.42665100 |
| F  | 3.24608300  | 3.75284300  | 2.17588500  |
| F  | 5.31399600  | 5.46301600  | 1.77017800  |
| F  | 6.01022800  | 6.18791200  | -0.76180700 |
| F  | 4.61096600  | 5.20949600  | -2.89839700 |
| F  | 2.53279100  | 3.52909300  | -2.50287400 |
| F  | -5.30421000 | -3.17812000 | 0.75506000  |
| F  | -3.07154700 | -2.83386300 | -3.41237900 |
| F  | -4.83202300 | -4.58166900 | -4.49328500 |
| F  | -6.83448700 | -5.62830800 | -2.96294600 |
| F  | -7.06455000 | -4.91957200 | -0.33929100 |
| C  | 3.12289000  | -4.08325300 | 1.46029600  |
| C  | 3.76175700  | -5.00574700 | 2.37942100  |
| H  | 4.61883000  | -5.49093800 | 1.89448400  |
| C  | 4.19120500  | -4.40128500 | 3.75941400  |
| H  | 4.87954400  | -3.55423700 | 3.70403900  |
| C  | 2.81999100  | -6.06872400 | 3.02823300  |
| H  | 2.25883400  | -6.69519000 | 2.33273200  |
| C  | 3.83277600  | -6.81470800 | 3.92808700  |
| H  | 3.33512400  | -7.33561200 | 4.75108400  |
| H  | 4.38489200  | -7.56485200 | 3.35317500  |

|   |             |             |             |
|---|-------------|-------------|-------------|
| C | 4.78260700  | -5.66898300 | 4.42379400  |
| H | 4.80632100  | -5.58168800 | 5.51399400  |
| H | 5.81088100  | -5.83600200 | 4.08807000  |
| C | 2.84898000  | -4.08917500 | 4.47209400  |
| H | 2.99487400  | -4.14370100 | 5.55388600  |
| C | 1.91540900  | -5.21752100 | 3.94559700  |
| H | 1.48179900  | -5.83973800 | 4.73493300  |
| N | 0.85738700  | -3.16975900 | 3.53794000  |
| H | 0.21753800  | -2.49268600 | 3.13157200  |
| C | 6.14931700  | -0.08883600 | -2.10845000 |
| C | 5.50510600  | -1.28044100 | -2.24799300 |
| C | 4.11780800  | -1.37036600 | -2.61112600 |
| C | 5.41629900  | 1.16753700  | -2.35263800 |
| H | 6.03109200  | -2.21045900 | -2.04981100 |
| C | 2.03406300  | -2.58610500 | -2.88321600 |
| H | 3.61906300  | 1.88873600  | -2.96740100 |
| C | 1.34199000  | -1.38223800 | -3.16520000 |
| C | 2.05535000  | -0.17916800 | -3.17811100 |
| H | 1.47686300  | -3.51671100 | -2.84664100 |
| C | 7.58148500  | 0.08249500  | -1.67601400 |
| H | 8.10118800  | 0.66210600  | -2.45044800 |
| H | 7.58767800  | 0.74427600  | -0.80002900 |
| C | -0.12965800 | -1.36469300 | -3.33121000 |
| H | -0.58035400 | -2.34082300 | -3.13950000 |
| H | -0.49293400 | -0.63781100 | -2.45062600 |
| C | -0.70628700 | -0.70979500 | -4.58280500 |
| H | -1.79778000 | -0.69672300 | -4.52546200 |
| H | -0.35862400 | 0.32061000  | -4.69710000 |
| H | -0.41555100 | -1.26879700 | -5.48093200 |
| C | 8.34307200  | -1.20775700 | -1.37544600 |
| H | 9.36807300  | -0.98174000 | -1.06856300 |
| H | 7.87074000  | -1.77425200 | -0.56505300 |
| H | 8.39566400  | -1.85947000 | -2.25439900 |
| C | 2.47544300  | -3.26806900 | 0.83641900  |
| C | -3.07803200 | 2.62893000  | 0.73580500  |
| C | -4.07343100 | 3.67093200  | 1.11390400  |
| C | -4.08275900 | 4.21038200  | 2.40488500  |
| C | -5.00799900 | 4.17143100  | 0.20217300  |
| C | -4.99053900 | 5.19821900  | 2.78111500  |
| C | -5.92965500 | 5.15330400  | 0.55771300  |
| C | -5.91799500 | 5.66834400  | 1.85287800  |
| F | -5.03427000 | 3.70387400  | -1.05357000 |
| F | -6.81491200 | 5.61027500  | -0.33448400 |
| F | -6.79382000 | 6.61243600  | 2.20317400  |

|   |             |             |             |
|---|-------------|-------------|-------------|
| F | -4.97957400 | 5.69495300  | 4.02189300  |
| F | -3.19929500 | 3.78206100  | 3.31227000  |
| C | 3.41979300  | -0.16681000 | -2.89268900 |
| C | 3.39481100  | -2.57950200 | -2.63346300 |
| H | 3.91401000  | -3.50563900 | -2.40360400 |
| H | 1.52722400  | 0.75930800  | -3.31422100 |
| N | 4.11777800  | 1.02086600  | -2.81226500 |
| O | 5.89181400  | 2.29027100  | -2.16295600 |
| C | 0.75511300  | -4.49585900 | 3.24891800  |
| C | 2.12565300  | -2.75446300 | 4.11906300  |
| H | 1.96095900  | -2.13890200 | 5.00967000  |
| H | 2.70322100  | -2.15469300 | 3.40457700  |
| O | -0.11461600 | -5.04002100 | 2.57987200  |

**<sup>5</sup>TS7-R**

|   |             |             |             |
|---|-------------|-------------|-------------|
| N | 0.88440500  | 2.10280900  | 0.26439600  |
| N | -1.16632700 | 0.16195100  | 0.12355100  |
| N | 0.78311100  | -1.86452700 | -0.13764300 |
| N | 2.84139800  | 0.06919300  | 0.13358000  |
| C | 1.97183400  | 2.87664200  | 0.59189000  |
| C | 1.57022800  | 4.26397200  | 0.63893200  |
| C | 0.25984300  | 4.31904700  | 0.28060600  |
| C | -0.18282700 | 2.96250200  | 0.08191900  |
| C | -1.50793000 | 2.58512000  | -0.09838700 |
| C | -1.96572300 | 1.26434500  | 0.02188700  |
| C | -3.34701500 | 0.88765000  | 0.20252000  |
| C | -3.35969500 | -0.44949100 | 0.45695700  |
| C | -1.99311400 | -0.90312700 | 0.37129200  |
| C | -1.58995200 | -2.24338500 | 0.41633700  |
| C | -0.28620200 | -2.67858100 | 0.08769900  |
| C | 0.08812300  | -4.04618000 | -0.14087800 |
| C | 1.39497200  | -4.03567300 | -0.54159200 |
| C | 1.83453100  | -2.66387200 | -0.50159800 |
| C | 3.16030200  | -2.23849400 | -0.66308400 |
| C | 3.62556000  | -0.97209500 | -0.29968800 |
| C | 5.01379000  | -0.57727100 | -0.24024900 |
| C | 5.04816500  | 0.68496100  | 0.26392400  |
| C | 3.67716400  | 1.09989200  | 0.45592200  |
| H | 2.21663500  | 5.08829800  | 0.89876600  |
| H | -0.37349900 | 5.19048500  | 0.20164700  |
| H | -4.18583300 | 1.56619400  | 0.16450600  |
| H | -4.20069500 | -1.08205400 | 0.68710600  |
| H | -0.57733500 | -4.88920600 | -0.02586000 |
| H | 2.01936800  | -4.88042800 | -0.79333300 |

|    |             |             |             |
|----|-------------|-------------|-------------|
| H  | 5.85112900  | -1.19535300 | -0.52671800 |
| H  | 5.91470800  | 1.30251900  | 0.44763200  |
| Mn | 0.84011100  | 0.13723100  | 0.06682600  |
| Cl | 0.78253600  | -0.20654400 | 2.42319100  |
| O  | 0.91728000  | 0.34656400  | -1.66542400 |
| C  | -2.53976000 | 3.63661100  | -0.33151600 |
| C  | -2.92523400 | 3.97461400  | -1.62730300 |
| C  | -3.21981500 | 4.25528600  | 0.72002800  |
| C  | -3.96819800 | 4.85294500  | -1.89321500 |
| C  | -4.25708500 | 5.15573800  | 0.48500800  |
| C  | -4.63311600 | 5.45053300  | -0.82518300 |
| C  | 4.12415100  | -3.23072000 | -1.21322800 |
| C  | 4.02184000  | -3.64057300 | -2.54702000 |
| C  | 5.13544000  | -3.80897800 | -0.44078700 |
| C  | 4.88834900  | -4.58073900 | -3.09785900 |
| C  | 6.01873600  | -4.74720100 | -0.97108700 |
| C  | 5.89166200  | -5.13471200 | -2.30399200 |
| F  | -2.88904800 | 3.97086800  | 1.98477900  |
| F  | -4.89575200 | 5.73596000  | 1.50562800  |
| F  | -5.63090800 | 6.30515500  | -1.05407600 |
| F  | -4.32563900 | 5.12312700  | -3.14798400 |
| F  | -2.30118900 | 3.39657700  | -2.68142000 |
| F  | 5.27518100  | -3.46253800 | 0.84478900  |
| F  | 3.06725400  | -3.12236900 | -3.33660300 |
| F  | 4.76813700  | -4.95103900 | -4.37671800 |
| F  | 6.73001000  | -6.03524300 | -2.82035900 |
| F  | 6.97769100  | -5.28364000 | -0.21003800 |
| C  | -3.22554400 | -3.97869100 | 1.48713200  |
| C  | -3.98476900 | -4.79405600 | 2.41614600  |
| H  | -4.52820300 | -5.57781200 | 1.87240400  |
| C  | -4.94602400 | -4.01713900 | 3.36988000  |
| H  | -5.68078800 | -3.37268400 | 2.88410600  |
| C  | -3.16602800 | -5.42257200 | 3.59476900  |
| H  | -2.32904200 | -6.05784500 | 3.29439600  |
| C  | -4.30585300 | -6.16635300 | 4.33367600  |
| H  | -4.04904700 | -6.36605000 | 5.37815100  |
| H  | -4.50843100 | -7.13102900 | 3.85798100  |
| C  | -5.52850900 | -5.19485200 | 4.18559200  |
| H  | -5.92246200 | -4.86253800 | 5.15030000  |
| H  | -6.35070600 | -5.67387900 | 3.64462800  |
| C  | -3.97468400 | -3.24498200 | 4.28898700  |
| H  | -4.47158100 | -2.97447300 | 5.22600800  |
| C  | -2.76414000 | -4.20601500 | 4.46941500  |
| H  | -2.64462300 | -4.53158800 | 5.50588700  |

|   |             |             |             |
|---|-------------|-------------|-------------|
| C | -3.38978800 | -1.95757400 | 3.69641200  |
| N | -2.03331800 | -2.05248300 | 3.75137800  |
| H | -1.43995200 | -1.33102900 | 3.35099400  |
| C | -6.05379700 | -0.02738200 | -2.18106400 |
| C | -5.44248100 | -1.24095700 | -2.26966400 |
| C | -4.05968000 | -1.38427900 | -2.63214600 |
| C | -5.28907900 | 1.19623300  | -2.48846600 |
| H | -5.99103000 | -2.14607600 | -2.02384500 |
| C | -2.01027300 | -2.66689000 | -2.84872100 |
| H | -3.47459800 | 1.84044200  | -3.13372200 |
| C | -1.28211500 | -1.49414400 | -3.17234700 |
| C | -1.96316200 | -0.27401500 | -3.24026500 |
| H | -1.47939700 | -3.61057900 | -2.77521900 |
| C | -7.47533400 | 0.20180300  | -1.74197200 |
| H | -7.99071500 | 0.75453400  | -2.53876000 |
| H | -7.45195500 | 0.90637200  | -0.90052800 |
| C | 0.18986200  | -1.52703400 | -3.32357900 |
| H | 0.60474100  | -2.51515900 | -3.11248300 |
| H | 0.57658400  | -0.80223700 | -2.45305200 |
| C | 0.80132900  | -0.91366000 | -4.58016800 |
| H | 1.89198500  | -0.93998100 | -4.51208300 |
| H | 0.49494300  | 0.12749800  | -4.71290600 |
| H | 0.49794600  | -1.47461000 | -5.47277400 |
| C | -8.26357600 | -1.05178800 | -1.36497100 |
| H | -9.27835400 | -0.78417000 | -1.05768100 |
| H | -7.79372900 | -1.58499300 | -0.53110400 |
| H | -8.34428000 | -1.74719200 | -2.20772800 |
| C | -2.52288000 | -3.21652400 | 0.85590500  |
| C | 3.28031500  | 2.41145200  | 0.75000600  |
| C | 4.34501300  | 3.37620800  | 1.14147500  |
| C | 5.00306100  | 3.24794300  | 2.36991000  |
| C | 4.75554100  | 4.41455500  | 0.29936200  |
| C | 6.01866600  | 4.12144800  | 2.75336800  |
| C | 5.76303100  | 5.30399700  | 0.66461500  |
| C | 6.39711400  | 5.15380500  | 1.89682300  |
| F | 4.17317300  | 4.57520400  | -0.89724800 |
| F | 6.13204100  | 6.28983000  | -0.16035200 |
| F | 7.36691500  | 5.99769500  | 2.25525500  |
| F | 6.62878600  | 3.97830200  | 3.93390100  |
| F | 4.66390300  | 2.26351400  | 3.20812100  |
| C | -3.32860700 | -0.21319500 | -2.96523600 |
| C | -3.37047900 | -2.61296100 | -2.60424600 |
| H | -3.91569000 | -3.51386600 | -2.33753400 |
| H | -1.41105700 | 0.64421000  | -3.41406200 |

|   |             |             |             |
|---|-------------|-------------|-------------|
| N | -3.99618800 | 0.99325600  | -2.94427900 |
| O | -5.73279400 | 2.33899200  | -2.35358900 |
| C | -1.51266400 | -3.38025900 | 4.04323600  |
| H | -0.76807100 | -3.33689300 | 4.84514100  |
| H | -1.02357500 | -3.80925200 | 3.16003100  |
| O | -4.04783400 | -1.01285900 | 3.27853000  |

**<sup>3</sup>TS8-S**

|    |             |             |             |
|----|-------------|-------------|-------------|
| N  | -1.00031600 | -1.84074900 | 0.37010800  |
| N  | -2.71074600 | 0.39021300  | 0.24290000  |
| N  | -0.47472600 | 2.06962300  | 0.63803500  |
| N  | 1.19180700  | -0.20512500 | 0.83511600  |
| C  | -0.14956800 | -2.81051600 | 0.83404200  |
| C  | -0.70715400 | -4.10327400 | 0.53176600  |
| C  | -1.87067700 | -3.89529300 | -0.14537100 |
| C  | -2.07908100 | -2.47017800 | -0.20147000 |
| C  | -3.26908600 | -1.84730600 | -0.59626400 |
| C  | -3.58357600 | -0.51518500 | -0.29301200 |
| C  | -4.89288000 | 0.08963400  | -0.38303200 |
| C  | -4.79167800 | 1.33973100  | 0.14448700  |
| C  | -3.40187100 | 1.54765900  | 0.48476700  |
| C  | -2.82535100 | 2.78133700  | 0.81400100  |
| C  | -1.44455300 | 3.02032700  | 0.79834100  |
| C  | -0.82591300 | 4.32531100  | 0.76513300  |
| C  | 0.50086700  | 4.13523300  | 0.51672300  |
| C  | 0.72123100  | 2.70987300  | 0.46279200  |
| C  | 1.97399100  | 2.08724800  | 0.40063200  |
| C  | 2.18192100  | 0.73079100  | 0.68944100  |
| C  | 3.44570800  | 0.13591100  | 1.05864900  |
| C  | 3.18001700  | -1.12210100 | 1.50646500  |
| C  | 1.76962400  | -1.35642600 | 1.30967800  |
| C  | 1.11768500  | -2.59170800 | 1.39263700  |
| H  | -0.23524600 | -5.04649800 | 0.76165000  |
| H  | -2.55301000 | -4.63698700 | -0.53330600 |
| H  | -5.77977100 | -0.39354200 | -0.76321500 |
| H  | -5.57717400 | 2.07118600  | 0.25809200  |
| H  | -1.35117800 | 5.26210200  | 0.87948900  |
| H  | 1.27324900  | 4.88465400  | 0.42245700  |
| H  | 4.40555800  | 0.62497900  | 1.01717400  |
| H  | 3.88753400  | -1.84466700 | 1.88104400  |
| Mn | -0.74995600 | 0.10196700  | 0.49082500  |
| Cl | -1.12028700 | 0.04283200  | 2.79948300  |
| O  | -0.51352500 | 0.36611900  | -1.18926800 |
| C  | -3.71467200 | 3.94949200  | 1.06717300  |



|   |             |             |             |
|---|-------------|-------------|-------------|
| C | -4.47968600 | 4.53851300  | 0.05576300  |
| C | -3.78048700 | 4.52536700  | 2.34083600  |
| C | -5.29558900 | 5.64094000  | 0.29777700  |
| C | -4.58440000 | 5.63268000  | 2.60455200  |
| C | -5.34532000 | 6.18955500  | 1.57819800  |
| C | -4.26773500 | -2.68728300 | -1.31180400 |
| C | -3.99189900 | -3.14659200 | -2.60466400 |
| C | -5.48228500 | -3.07698800 | -0.74005700 |
| C | -4.88549000 | -3.94884100 | -3.30895800 |
| C | -6.39573800 | -3.87374600 | -1.42717500 |
| C | -6.09348200 | -4.31214800 | -2.71528600 |
| C | 3.14308900  | 2.92393000  | 0.01762200  |
| C | 3.24175000  | 3.38409100  | -1.29952200 |
| C | 4.19637900  | 3.23386900  | 0.88256200  |
| C | 4.35278000  | 4.08571800  | -1.75300000 |
| C | 5.32408100  | 3.92492300  | 0.44658900  |
| C | 5.40104900  | 4.34716000  | -0.87777500 |
| F | -4.44024600 | 4.04205400  | -1.18893500 |
| F | -6.01947200 | 6.18112300  | -0.68867000 |
| F | -6.12036100 | 7.24873000  | 1.82027400  |
| F | -4.63166100 | 6.16189200  | 3.83087800  |
| F | -3.05602200 | 4.01527600  | 3.34115900  |
| F | -5.79567900 | -2.68067800 | 0.50038400  |
| F | -7.55147300 | -4.22793800 | -0.85682300 |
| F | -6.95989400 | -5.07858400 | -3.38014700 |
| F | -4.59608000 | -4.36852100 | -4.54438400 |
| F | -2.83537100 | -2.81523100 | -3.20012300 |
| F | 4.15754300  | 2.83218700  | 2.16055600  |
| F | 2.27585200  | 3.09715200  | -2.18372000 |
| F | 4.45848900  | 4.42935400  | -3.04339500 |
| F | 6.51062600  | 4.94552000  | -1.32455800 |
| F | 6.34830700  | 4.15024400  | 1.27638100  |
| C | 6.37841400  | 0.43355400  | -2.06110700 |
| C | 5.66038600  | -0.69395000 | -1.67205700 |
| C | 4.33291200  | -0.87902400 | -2.09181400 |
| C | 3.69352300  | 0.08938700  | -2.90266200 |
| C | 4.43952000  | 1.21726000  | -3.30155400 |
| C | 5.75070600  | 1.38738000  | -2.89251700 |
| H | 6.12501700  | -1.44344800 | -1.03564600 |
| C | 2.31216300  | -0.10873200 | -3.23558100 |
| H | 3.95724100  | 1.97584400  | -3.90982200 |
| H | 6.29752000  | 2.27518000  | -3.19757700 |
| C | 1.60666800  | -1.20295900 | -2.82323100 |
| C | 2.27251100  | -2.23480000 | -2.00751700 |

|   |             |             |             |
|---|-------------|-------------|-------------|
| H | 1.81739400  | 0.66687500  | -3.81248000 |
| C | 7.79589900  | 0.65540400  | -1.58021400 |
| H | 8.18191100  | -0.27093600 | -1.14049500 |
| H | 8.43786200  | 0.88253900  | -2.44072500 |
| O | 1.72036100  | -3.24959900 | -1.58034700 |
| C | 0.14552900  | -1.38568000 | -3.01890500 |
| H | -0.12031700 | -2.44400300 | -2.95493600 |
| H | -0.31168100 | -0.92258200 | -2.07523000 |
| C | -0.51148200 | -0.67080500 | -4.19107200 |
| H | -1.57600400 | -0.91397000 | -4.22078700 |
| H | -0.42141200 | 0.41569700  | -4.09774700 |
| H | -0.06153100 | -0.97444700 | -5.14346200 |
| C | 7.91267100  | 1.79713100  | -0.55435000 |
| H | 8.94177900  | 1.89090700  | -0.19378500 |
| H | 7.62729300  | 2.75739400  | -0.99111000 |
| H | 7.26742400  | 1.61732500  | 0.31179500  |
| N | 3.61099600  | -1.99134700 | -1.71980200 |
| H | 4.03377300  | -2.67705800 | -1.10909700 |
| C | 1.77385000  | -3.75386500 | 2.05263800  |
| C | 2.96799200  | -4.34960400 | 1.63437600  |
| C | 1.14847100  | -4.32963800 | 3.17099300  |
| C | 3.52263700  | -5.44696200 | 2.28855200  |
| C | 1.67937300  | -5.43177300 | 3.83636500  |
| C | 2.87418500  | -5.99383200 | 3.39246300  |
| F | 3.65290400  | -3.87297100 | 0.57921600  |
| F | 0.00046700  | -3.82134700 | 3.62762700  |
| F | 1.05332300  | -5.94958300 | 4.89683000  |
| F | 3.39637300  | -7.04743700 | 4.02244600  |
| F | 4.67084100  | -5.97963600 | 1.85523100  |

**<sup>3</sup>TS8-R**

|   |             |             |             |
|---|-------------|-------------|-------------|
| N | 1.00031500  | -1.84075000 | 0.37010900  |
| N | 2.71074600  | 0.39021100  | 0.24290000  |
| N | 0.47472700  | 2.06962200  | 0.63803900  |
| N | -1.19180700 | -0.20512500 | 0.83512100  |
| C | 0.14956700  | -2.81051700 | 0.83404300  |
| C | 0.70715200  | -4.10327500 | 0.53176600  |
| C | 1.87067500  | -3.89529500 | -0.14537100 |
| C | 2.07907900  | -2.47017900 | -0.20147000 |
| C | 3.26908400  | -1.84730800 | -0.59626500 |
| C | 3.58357500  | -0.51518700 | -0.29301300 |
| C | 4.89287900  | 0.08963100  | -0.38303200 |
| C | 4.79167800  | 1.33972800  | 0.14448700  |
| C | 3.40187100  | 1.54765700  | 0.48476700  |

|    |             |             |             |
|----|-------------|-------------|-------------|
| C  | 2.82535300  | 2.78133500  | 0.81400200  |
| C  | 1.44455400  | 3.02032600  | 0.79834400  |
| C  | 0.82591500  | 4.32531000  | 0.76513600  |
| C  | -0.50086600 | 4.13523200  | 0.51672600  |
| C  | -0.72123000 | 2.70987300  | 0.46279600  |
| C  | -1.97399000 | 2.08724800  | 0.40063700  |
| C  | -2.18192000 | 0.73079100  | 0.68944600  |
| C  | -3.44570800 | 0.13591200  | 1.05865400  |
| C  | -3.18001700 | -1.12210100 | 1.50646900  |
| C  | -1.76962500 | -1.35642700 | 1.30968200  |
| C  | -1.11768500 | -2.59170900 | 1.39263900  |
| H  | 0.23524400  | -5.04649900 | 0.76165200  |
| H  | 2.55300700  | -4.63698800 | -0.53330700 |
| H  | 5.77976900  | -0.39354500 | -0.76321700 |
| H  | 5.57717500  | 2.07118200  | 0.25809200  |
| H  | 1.35118000  | 5.26210100  | 0.87949200  |
| H  | -1.27324700 | 4.88465400  | 0.42246100  |
| H  | -4.40555700 | 0.62498000  | 1.01718000  |
| H  | -3.88753400 | -1.84466700 | 1.88104800  |
| Mn | 0.74995600  | 0.10196600  | 0.49082800  |
| Cl | 1.12029000  | 0.04282900  | 2.79948500  |
| O  | 0.51352200  | 0.36612100  | -1.18926400 |
| C  | 3.71467400  | 3.94948900  | 1.06717500  |
| C  | 4.47968800  | 4.53851000  | 0.05576400  |
| C  | 3.78049000  | 4.52536400  | 2.34083700  |
| C  | 5.29559200  | 5.64093600  | 0.29777700  |
| C  | 4.58440400  | 5.63267700  | 2.60455300  |
| C  | 5.34532400  | 6.18955200  | 1.57819900  |
| C  | 4.26773200  | -2.68728500 | -1.31180600 |
| C  | 3.99189800  | -3.14659000 | -2.60466700 |
| C  | 5.48228100  | -3.07699300 | -0.74005800 |
| C  | 4.88548800  | -3.94883900 | -3.30896200 |
| C  | 6.39573400  | -3.87375100 | -1.42717600 |
| C  | 6.09347900  | -4.31214900 | -2.71528900 |
| C  | -3.14308700 | 2.92393000  | 0.01762500  |
| C  | -3.24174800 | 3.38408900  | -1.29952000 |
| C  | -4.19637700 | 3.23387100  | 0.88256500  |
| C  | -4.35277700 | 4.08571700  | -1.75299800 |
| C  | -5.32407900 | 3.92492500  | 0.44659100  |
| C  | -5.40104600 | 4.34716100  | -0.87777400 |
| F  | 4.44024700  | 4.04205100  | -1.18893400 |
| F  | 6.01947400  | 6.18111900  | -0.68867000 |
| F  | 6.12036600  | 7.24872600  | 1.82027400  |
| F  | 4.63166500  | 6.16188900  | 3.83087900  |

|   |             |             |             |
|---|-------------|-------------|-------------|
| F | 3.05602500  | 4.01527400  | 3.34116000  |
| F | 5.79567300  | -2.68068600 | 0.50038400  |
| F | 7.55146700  | -4.22794600 | -0.85682300 |
| F | 6.95989100  | -5.07858600 | -3.38015000 |
| F | 4.59608000  | -4.36851500 | -4.54438900 |
| F | 2.83537100  | -2.81522600 | -3.20012700 |
| F | -4.15754200 | 2.83218900  | 2.16055900  |
| F | -2.27584900 | 3.09714900  | -2.18371700 |
| F | -4.45848500 | 4.42935300  | -3.04339300 |
| F | -6.51062200 | 4.94552200  | -1.32455700 |
| F | -6.34830400 | 4.15024900  | 1.27638200  |
| C | -6.37841300 | 0.43356000  | -2.06111000 |
| C | -5.66038500 | -0.69394400 | -1.67206000 |
| C | -4.33291100 | -0.87901900 | -2.09181700 |
| C | -3.69352300 | 0.08939200  | -2.90266700 |
| C | -4.43952000 | 1.21726500  | -3.30155900 |
| C | -5.75070600 | 1.38738500  | -2.89252000 |
| H | -6.12501600 | -1.44344200 | -1.03564900 |
| C | -2.31216300 | -0.10872700 | -3.23558700 |
| H | -3.95724100 | 1.97584800  | -3.90982700 |
| H | -6.29752000 | 2.27518500  | -3.19758100 |
| C | -1.60666800 | -1.20295300 | -2.82323600 |
| C | -2.27251000 | -2.23479400 | -2.00752100 |
| H | -1.81739400 | 0.66687900  | -3.81248700 |
| C | -7.79589800 | 0.65540800  | -1.58021800 |
| H | -8.18191100 | -0.27093300 | -1.14050200 |
| H | -8.43786100 | 0.88254700  | -2.44072800 |
| O | -1.72035900 | -3.24959300 | -1.58035200 |
| C | -0.14552800 | -1.38567300 | -3.01890900 |
| H | 0.12031800  | -2.44399600 | -2.95494700 |
| H | 0.31168000  | -0.92258100 | -2.07523100 |
| C | 0.51148300  | -0.67078800 | -4.19107000 |
| H | 1.57600200  | -0.91396500 | -4.22079800 |
| H | 0.42142600  | 0.41571300  | -4.09772800 |
| H | 0.06152100  | -0.97441000 | -5.14346200 |
| C | -7.91267100 | 1.79713200  | -0.55434900 |
| H | -8.94177900 | 1.89090900  | -0.19378700 |
| H | -7.62728900 | 2.75739600  | -0.99110600 |
| H | -7.26742500 | 1.61732100  | 0.31179600  |
| N | -3.61099500 | -1.99134000 | -1.71980500 |
| H | -4.03377100 | -2.67705100 | -1.10909900 |
| C | -1.77385100 | -3.75386600 | 2.05263900  |
| C | -2.96799300 | -4.34960400 | 1.63437400  |
| C | -1.14847500 | -4.32964000 | 3.17099300  |

|   |             |             |            |
|---|-------------|-------------|------------|
| C | -3.52264000 | -5.44696300 | 2.28854800 |
| C | -1.67937800 | -5.43177500 | 3.83636500 |
| C | -2.87419000 | -5.99383300 | 3.39246000 |
| F | -3.65290400 | -3.87297000 | 0.57921400 |
| F | -0.00047100 | -3.82134900 | 3.62763000 |
| F | -1.05333000 | -5.94958600 | 4.89683000 |
| F | -3.39637900 | -7.04743900 | 4.02244200 |
| F | -4.67084400 | -5.97963500 | 1.85522600 |

**<sup>5</sup>TS8-S**

|    |             |             |             |
|----|-------------|-------------|-------------|
| C  | 2.03700000  | 0.50673000  | 0.82716500  |
| C  | 3.26506800  | -0.21110900 | 1.06741800  |
| C  | 2.92164800  | -1.47985500 | 1.41684000  |
| C  | 1.48297100  | -1.57159900 | 1.33441600  |
| N  | 0.97560200  | -0.34544900 | 0.98989100  |
| H  | 4.25777300  | 0.20233900  | 0.98340400  |
| H  | 3.57925100  | -2.30707100 | 1.63173700  |
| C  | -2.50954400 | -2.42594500 | 0.06806100  |
| C  | -2.49357000 | -3.84489200 | 0.32714300  |
| C  | -1.32538300 | -4.11784000 | 0.96842100  |
| C  | -0.58447800 | -2.88208400 | 1.04571300  |
| N  | -1.34808300 | -1.86777400 | 0.52077800  |
| H  | -3.29537100 | -4.52796000 | 0.08937900  |
| H  | -0.98509400 | -5.07191000 | 1.33962200  |
| C  | -1.42781900 | 3.06457200  | 0.70854000  |
| C  | -0.71059000 | 4.31514200  | 0.76334900  |
| C  | 0.61340600  | 4.02253000  | 0.64885400  |
| C  | 0.72754800  | 2.58667400  | 0.58249800  |
| N  | -0.53062900 | 2.03251200  | 0.62509700  |
| H  | -1.17001700 | 5.28915200  | 0.84331900  |
| H  | 1.44522100  | 4.71104700  | 0.64761200  |
| C  | -3.45177400 | 1.75246000  | 0.23464900  |
| C  | -4.82128500 | 1.63936000  | -0.20819100 |
| C  | -5.00336500 | 0.35847900  | -0.62425000 |
| C  | -3.77406000 | -0.35159900 | -0.36298900 |
| N  | -2.84217700 | 0.52683600  | 0.13957200  |
| H  | -5.53828500 | 2.44573300  | -0.22571200 |
| H  | -5.90029200 | -0.07848800 | -1.03561900 |
| C  | 1.93425800  | 1.88350000  | 0.57645900  |
| C  | -3.61243600 | -1.73410200 | -0.45348100 |
| C  | 0.75330100  | -2.76395400 | 1.43864100  |
| C  | -2.81581800 | 2.94610900  | 0.58477600  |
| Mn | -0.94001600 | 0.09684400  | 0.56722500  |
| Cl | -1.41665700 | 0.08620800  | 2.84243300  |

|   |             |             |             |
|---|-------------|-------------|-------------|
| O | -0.56601400 | 0.11979200  | -1.16585300 |
| C | -3.62806500 | 4.18720700  | 0.72117500  |
| C | -4.23657600 | 4.80280900  | -0.37678000 |
| C | -3.78018100 | 4.80228400  | 1.96868500  |
| C | -4.98394400 | 5.97059700  | -0.24475900 |
| C | -4.51661200 | 5.97508700  | 2.12354400  |
| C | -5.12159200 | 6.55844900  | 1.01159000  |
| C | -4.69573600 | -2.55355700 | -1.06336600 |
| C | -4.46728400 | -3.23504000 | -2.26408400 |
| C | -5.95014400 | -2.71055100 | -0.46601700 |
| C | -5.44470800 | -4.03014700 | -2.85703300 |
| C | -6.94582300 | -3.49558400 | -1.04338000 |
| C | -6.68941600 | -4.15836500 | -2.24250600 |
| C | 1.49254200  | -3.98637500 | 1.85208800  |
| C | 1.65847900  | -5.08321000 | 0.99603800  |
| C | 2.10649400  | -4.05819300 | 3.10865300  |
| C | 2.40482200  | -6.19731800 | 1.37013900  |
| C | 2.85882200  | -5.16195500 | 3.50090600  |
| C | 3.00735800  | -6.23587400 | 2.62557000  |
| C | 3.16538800  | 2.66978200  | 0.29518000  |
| C | 3.31030400  | 3.28888400  | -0.95175300 |
| C | 4.20093900  | 2.84985400  | 1.21791400  |
| C | 4.43259700  | 4.04020700  | -1.27915700 |
| C | 5.34347800  | 3.58485700  | 0.90624200  |
| C | 5.45167000  | 4.18897900  | -0.34405400 |
| F | 4.11651700  | 2.30413700  | 2.43777800  |
| F | 6.32828400  | 3.72356300  | 1.79919900  |
| F | 6.54950000  | 4.88535500  | -0.65927300 |
| F | -3.20430700 | 4.26729200  | 3.04976700  |
| F | -6.22092500 | -2.09620700 | 0.69272800  |
| F | -8.13747600 | -3.62516600 | -0.45172200 |
| F | -7.63501800 | -4.91534100 | -2.80203000 |
| F | 1.99029400  | -3.03740800 | 3.96741100  |
| F | 3.43365800  | -5.19969700 | 4.70836300  |
| F | 3.72383100  | -7.30177700 | 2.99103700  |
| F | 2.54743000  | -7.22967800 | 0.53215400  |
| F | 1.08766800  | -5.09872700 | -0.21230800 |
| F | 2.35905200  | 3.14159100  | -1.88677700 |
| F | 4.55677300  | 4.58028500  | -2.49805700 |
| F | -3.27869700 | -3.13392700 | -2.87584600 |
| F | -5.19986600 | -4.66609900 | -4.00681100 |
| F | -4.11158700 | 4.26574200  | -1.59868100 |
| F | -5.55884600 | 6.53459300  | -1.31243900 |
| F | -5.83147200 | 7.68013100  | 1.14896500  |

|   |             |             |             |
|---|-------------|-------------|-------------|
| F | -4.64797700 | 6.54141800  | 3.32689100  |
| C | 6.78899000  | 0.96485600  | -2.67487100 |
| C | 6.40291400  | -0.26373200 | -2.14405300 |
| C | 5.05719500  | -0.65619000 | -2.15920500 |
| C | 4.06217000  | 0.19035000  | -2.71017900 |
| C | 4.47314400  | 1.42437400  | -3.25537000 |
| C | 5.80405700  | 1.80509000  | -3.23654700 |
| H | 7.14819500  | -0.92755300 | -1.71136800 |
| C | 2.69856800  | -0.24927500 | -2.66787600 |
| H | 3.72153000  | 2.09028300  | -3.66582500 |
| H | 6.09188600  | 2.77184700  | -3.63777000 |
| C | 2.32248200  | -1.45648500 | -2.14204200 |
| C | 3.34881200  | -2.33714500 | -1.55080100 |
| H | 1.93143200  | 0.42218000  | -3.04609000 |
| C | 8.23092400  | 1.41117400  | -2.59202200 |
| H | 8.88989100  | 0.53902400  | -2.67507500 |
| H | 8.46270800  | 2.06318500  | -3.44188800 |
| O | 3.13239800  | -3.41683900 | -1.00098900 |
| C | 0.90444800  | -1.90454200 | -2.08843900 |
| H | 0.81749800  | -2.81293900 | -1.49009800 |
| C | 8.53475200  | 2.15602000  | -1.27818100 |
| H | 9.59260600  | 2.43175100  | -1.22347200 |
| H | 7.94383700  | 3.07129400  | -1.19667100 |
| H | 8.30220600  | 1.52745300  | -0.41204000 |
| N | 4.65461800  | -1.86496200 | -1.63376600 |
| H | 5.34151300  | -2.48383500 | -1.22080300 |
| C | 0.18344000  | -2.04034300 | -3.43065400 |
| H | 0.22834800  | -1.10978000 | -4.00475600 |
| H | 0.63663100  | -2.83551800 | -4.03410100 |
| H | -0.86904900 | -2.28592700 | -3.26600200 |
| H | 0.31454900  | -1.08077300 | -1.53093100 |

**<sup>5</sup>TS8-R**

|   |             |             |            |
|---|-------------|-------------|------------|
| C | -2.03700000 | 0.50673000  | 0.82716500 |
| C | -3.26506800 | -0.21110900 | 1.06741800 |
| C | -2.92164800 | -1.47985500 | 1.41684000 |
| C | -1.48297100 | -1.57159900 | 1.33441600 |
| N | -0.97560200 | -0.34544900 | 0.98989100 |
| H | -4.25777300 | 0.20233900  | 0.98340400 |
| H | -3.57925100 | -2.30707100 | 1.63173700 |
| C | 2.50954400  | -2.42594500 | 0.06806100 |
| C | 2.49357000  | -3.84489200 | 0.32714300 |
| C | 1.32538300  | -4.11784000 | 0.96842100 |
| C | 0.58447800  | -2.88208400 | 1.04571300 |

|    |             |             |             |
|----|-------------|-------------|-------------|
| N  | 1.34808300  | -1.86777400 | 0.52077800  |
| H  | 3.29537100  | -4.52796000 | 0.08937900  |
| H  | 0.98509400  | -5.07191000 | 1.33962200  |
| C  | 1.42781900  | 3.06457200  | 0.70854000  |
| C  | 0.71058900  | 4.31514200  | 0.76334900  |
| C  | -0.61340600 | 4.02253000  | 0.64885400  |
| C  | -0.72754800 | 2.58667400  | 0.58249800  |
| N  | 0.53062900  | 2.03251200  | 0.62509700  |
| H  | 1.17001700  | 5.28915200  | 0.84331900  |
| H  | -1.44522100 | 4.71104700  | 0.64761200  |
| C  | 3.45177400  | 1.75246000  | 0.23464900  |
| C  | 4.82128500  | 1.63936100  | -0.20819100 |
| C  | 5.00336500  | 0.35847900  | -0.62425000 |
| C  | 3.77406000  | -0.35159900 | -0.36298900 |
| N  | 2.84217700  | 0.52683600  | 0.13957200  |
| H  | 5.53828400  | 2.44573400  | -0.22571200 |
| H  | 5.90029200  | -0.07848800 | -1.03561900 |
| C  | -1.93425800 | 1.88350000  | 0.57645900  |
| C  | 3.61243600  | -1.73410200 | -0.45348100 |
| C  | -0.75330100 | -2.76395400 | 1.43864100  |
| C  | 2.81581800  | 2.94610900  | 0.58477600  |
| Mn | 0.94001600  | 0.09684400  | 0.56722500  |
| Cl | 1.41665700  | 0.08620800  | 2.84243300  |
| O  | 0.56601400  | 0.11979200  | -1.16585300 |
| C  | 3.62806500  | 4.18720700  | 0.72117500  |
| C  | 4.23657600  | 4.80281000  | -0.37678000 |
| C  | 3.78018100  | 4.80228400  | 1.96868500  |
| C  | 4.98394400  | 5.97059700  | -0.24475900 |
| C  | 4.51661200  | 5.97508700  | 2.12354400  |
| C  | 5.12159200  | 6.55844900  | 1.01159000  |
| C  | 4.69573600  | -2.55355700 | -1.06336600 |
| C  | 4.46728400  | -3.23504000 | -2.26408400 |
| C  | 5.95014500  | -2.71055100 | -0.46601700 |
| C  | 5.44470900  | -4.03014700 | -2.85703300 |
| C  | 6.94582300  | -3.49558400 | -1.04338000 |
| C  | 6.68941700  | -4.15836500 | -2.24250600 |
| C  | -1.49254200 | -3.98637500 | 1.85208800  |
| C  | -1.65847900 | -5.08321000 | 0.99603800  |
| C  | -2.10649400 | -4.05819300 | 3.10865300  |
| C  | -2.40482200 | -6.19731800 | 1.37013900  |
| C  | -2.85882200 | -5.16195500 | 3.50090600  |
| C  | -3.00735800 | -6.23587400 | 2.62557000  |
| C  | -3.16538800 | 2.66978200  | 0.29518000  |
| C  | -3.31030400 | 3.28888400  | -0.95175300 |



|   |             |             |             |
|---|-------------|-------------|-------------|
| C | -4.20093900 | 2.84985400  | 1.21791400  |
| C | -4.43259700 | 4.04020600  | -1.27915700 |
| C | -5.34347800 | 3.58485700  | 0.90624300  |
| C | -5.45167000 | 4.18897900  | -0.34405400 |
| F | -4.11651700 | 2.30413700  | 2.43777800  |
| F | -6.32828400 | 3.72356300  | 1.79919900  |
| F | -6.54950000 | 4.88535500  | -0.65927300 |
| F | 3.20430600  | 4.26729200  | 3.04976700  |
| F | 6.22092500  | -2.09620700 | 0.69272800  |
| F | 8.13747600  | -3.62516600 | -0.45172200 |
| F | 7.63501800  | -4.91534100 | -2.80203000 |
| F | -1.99029400 | -3.03740900 | 3.96741100  |
| F | -3.43365700 | -5.19969700 | 4.70836300  |
| F | -3.72383100 | -7.30177700 | 2.99103700  |
| F | -2.54743000 | -7.22967800 | 0.53215300  |
| F | -1.08766700 | -5.09872700 | -0.21230800 |
| F | -2.35905200 | 3.14159100  | -1.88677700 |
| F | -4.55677300 | 4.58028400  | -2.49805700 |
| F | 3.27869700  | -3.13392700 | -2.87584600 |
| F | 5.19986700  | -4.66609800 | -4.00681100 |
| F | 4.11158700  | 4.26574200  | -1.59868100 |
| F | 5.55884600  | 6.53459300  | -1.31243900 |
| F | 5.83147200  | 7.68013200  | 1.14896500  |
| F | 4.64797600  | 6.54141800  | 3.32689100  |
| C | -6.78899000 | 0.96485600  | -2.67487200 |
| C | -6.40291400 | -0.26373200 | -2.14405300 |
| C | -5.05719500 | -0.65618900 | -2.15920500 |
| C | -4.06217000 | 0.19034900  | -2.71017900 |
| C | -4.47314400 | 1.42437400  | -3.25537100 |
| C | -5.80405700 | 1.80509000  | -3.23654700 |
| H | -7.14819400 | -0.92755300 | -1.71136800 |
| C | -2.69856800 | -0.24927500 | -2.66787600 |
| H | -3.72153000 | 2.09028300  | -3.66582500 |
| H | -6.09188600 | 2.77184700  | -3.63777000 |
| C | -2.32248200 | -1.45648500 | -2.14204200 |
| C | -3.34881200 | -2.33714500 | -1.55080100 |
| H | -1.93143200 | 0.42218000  | -3.04609000 |
| C | -8.23092400 | 1.41117400  | -2.59202200 |
| H | -8.88989100 | 0.53902400  | -2.67507500 |
| H | -8.46270800 | 2.06318500  | -3.44188900 |
| O | -3.13239800 | -3.41683900 | -1.00098900 |
| C | -0.90444800 | -1.90454200 | -2.08843900 |
| H | -0.81749800 | -2.81293900 | -1.49009800 |
| C | -8.53475200 | 2.15602000  | -1.27818100 |

|   |             |             |             |
|---|-------------|-------------|-------------|
| H | -9.59260600 | 2.43175100  | -1.22347200 |
| H | -7.94383700 | 3.07129400  | -1.19667100 |
| H | -8.30220600 | 1.52745300  | -0.41204000 |
| N | -4.65461800 | -1.86496200 | -1.63376600 |
| H | -5.34151300 | -2.48383400 | -1.22080300 |
| C | -0.18344000 | -2.04034300 | -3.43065400 |
| H | -0.22834800 | -1.10978000 | -4.00475600 |
| H | -0.63663100 | -2.83551800 | -4.03410100 |
| H | 0.86904900  | -2.28592700 | -3.26600200 |
| H | -0.31454900 | -1.08077300 | -1.53093100 |

**<sup>3</sup>TS9-S**

|    |             |             |             |
|----|-------------|-------------|-------------|
| N  | 0.13203300  | 1.97918100  | -0.67924300 |
| N  | -0.95681300 | -0.62164700 | -1.03007000 |
| N  | 1.56437100  | -1.74408400 | -0.39685900 |
| N  | 2.67814900  | 0.84948200  | -0.14848100 |
| C  | 0.86346400  | 3.13697400  | -0.75425900 |
| C  | -0.03933600 | 4.25860300  | -0.86610800 |
| C  | -1.30357100 | 3.76434000  | -0.79421800 |
| C  | -1.19309700 | 2.32695100  | -0.70905000 |
| C  | -2.27660000 | 1.44982800  | -0.82289400 |
| C  | -2.13252300 | 0.08138100  | -1.08523100 |
| C  | -3.18442400 | -0.78867600 | -1.55947900 |
| C  | -2.61852600 | -2.00227200 | -1.80483000 |
| C  | -1.22862300 | -1.90634200 | -1.42900300 |
| C  | -0.34689500 | -2.98558400 | -1.34069600 |
| C  | 0.93949200  | -2.89740400 | -0.80168000 |
| C  | 1.77508500  | -4.02602300 | -0.48103900 |
| C  | 2.88700800  | -3.54006800 | 0.13788000  |
| C  | 2.76405700  | -2.10461600 | 0.16628800  |
| C  | 3.77193700  | -1.22871900 | 0.58414000  |
| C  | 3.73616400  | 0.15172400  | 0.37372300  |
| C  | 4.84377800  | 1.05454800  | 0.58387900  |
| C  | 4.44756300  | 2.27885700  | 0.14677100  |
| C  | 3.07368000  | 2.15254400  | -0.28294100 |
| H  | 0.26088500  | 5.28999800  | -0.97023200 |
| H  | -2.23395900 | 4.30958600  | -0.84796400 |
| H  | -4.20800700 | -0.49341700 | -1.73157400 |
| H  | -3.09699200 | -2.88923800 | -2.19299400 |
| H  | 1.52871100  | -5.05669900 | -0.68862900 |
| H  | 3.73513200  | -4.09579100 | 0.50915600  |
| H  | 5.80212600  | 0.77809300  | 0.99663000  |
| H  | 5.01266800  | 3.19889500  | 0.14966900  |
| Mn | 0.85012700  | 0.10935300  | -0.52946000 |

|    |             |             |             |
|----|-------------|-------------|-------------|
| C1 | 1.37734800  | 0.17579800  | -2.79900500 |
| O  | 0.47322200  | 0.18430300  | 1.14337000  |
| C  | -3.64290600 | 2.02643900  | -0.68408700 |
| C  | -4.04429600 | 2.55129800  | 0.55064200  |
| C  | -4.56710300 | 2.08467600  | -1.73153400 |
| C  | -5.30612300 | 3.10620700  | 0.73649000  |
| C  | -5.84816100 | 2.60144900  | -1.55813700 |
| C  | -6.21462000 | 3.11705000  | -0.31811500 |
| C  | 4.98805700  | -1.82598300 | 1.20419200  |
| C  | 4.93902600  | -2.37784000 | 2.48774600  |
| C  | 6.21037600  | -1.88277400 | 0.52726200  |
| C  | 6.05487200  | -2.96220800 | 3.08171700  |
| C  | 7.34268000  | -2.45479000 | 1.10345000  |
| C  | 7.26167800  | -2.99815100 | 2.38476900  |
| F  | -4.23422600 | 1.61794100  | -2.94452100 |
| F  | -6.71456000 | 2.61975300  | -2.57278100 |
| F  | -7.44246300 | 3.60609500  | -0.13127500 |
| F  | -5.66260500 | 3.59628400  | 1.92955300  |
| F  | -3.20733000 | 2.51974900  | 1.59580500  |
| F  | 6.31370200  | -1.37428900 | -0.70631100 |
| F  | 3.79171100  | -2.35354100 | 3.18188900  |
| F  | 5.97790900  | -3.48083800 | 4.31108600  |
| F  | 8.33871900  | -3.55155300 | 2.94419500  |
| F  | 8.49916900  | -2.49339400 | 0.43537200  |
| C  | -6.35701900 | 0.63557900  | 2.43436200  |
| C  | -5.37398100 | 0.66674800  | 3.37673000  |
| C  | -4.13162600 | -0.04039500 | 3.22931500  |
| C  | -6.14156600 | -0.11559500 | 1.18563000  |
| H  | -5.51748300 | 1.26194100  | 4.27622200  |
| C  | -1.88146400 | -0.64729100 | 3.92782900  |
| H  | -4.84081300 | -1.39588400 | 0.29273400  |
| C  | -1.71379700 | -1.44495700 | 2.77301000  |
| C  | -2.77078000 | -1.54985700 | 1.86878900  |
| H  | -1.06920400 | -0.55185100 | 4.63955600  |
| C  | -7.67052600 | 1.35828000  | 2.57015600  |
| H  | -7.61476300 | 2.05050600  | 3.41677100  |
| H  | -7.84290800 | 1.95904900  | 1.67202900  |
| C  | -0.40546800 | -2.07800200 | 2.41412500  |
| H  | -0.56534300 | -2.89712100 | 1.70489700  |
| H  | 0.12743800  | -1.27858200 | 1.80981800  |
| C  | 0.52975300  | -2.50102600 | 3.54300400  |
| H  | 1.43352600  | -2.95609600 | 3.13202500  |
| H  | 0.84467300  | -1.64901500 | 4.15240400  |
| H  | 0.04444900  | -3.22917100 | 4.20296800  |

|   |             |             |             |
|---|-------------|-------------|-------------|
| C | -8.85368200 | 0.38979400  | 2.74613600  |
| H | -9.79402700 | 0.94304100  | 2.83479800  |
| H | -8.92609900 | -0.27335700 | 1.88054800  |
| H | -8.73062500 | -0.22214300 | 3.64584300  |
| C | 2.25242000  | 3.23140300  | -0.62841500 |
| C | 2.89624400  | 4.56729700  | -0.77036700 |
| C | 3.75769000  | 4.83140900  | -1.84099400 |
| C | 2.69579100  | 5.59081000  | 0.16112000  |
| C | 4.38760000  | 6.06558900  | -1.98812800 |
| C | 3.30888500  | 6.83443100  | 0.03042300  |
| C | 4.15927000  | 7.06986400  | -1.04881400 |
| F | 1.89188400  | 5.38806700  | 1.21424300  |
| F | 3.09599800  | 7.79592900  | 0.93475300  |
| F | 4.75518300  | 8.25611300  | -1.18149200 |
| F | 5.20424200  | 6.29288700  | -3.02090600 |
| F | 3.99836600  | 3.88328100  | -2.75175700 |
| C | -3.95712100 | -0.84214000 | 2.07668900  |
| C | -3.06911300 | 0.02790000  | 4.15245600  |
| H | -3.18967400 | 0.64054600  | 5.04180600  |
| H | -2.66243600 | -2.16173800 | 0.98050200  |
| N | -4.98155200 | -0.87705600 | 1.14986400  |
| O | -6.89727600 | -0.08942400 | 0.21075200  |
| C | -0.84412100 | -4.33664100 | -1.72230000 |
| C | -1.77612100 | -5.01454900 | -0.93187600 |
| C | -0.37853900 | -4.98569300 | -2.86948200 |
| C | -2.24675600 | -6.28065500 | -1.26744800 |
| C | -0.83022300 | -6.25586100 | -3.22444400 |
| C | -1.76879900 | -6.90181300 | -2.42111100 |
| F | -2.23779600 | -4.44368500 | 0.19527500  |
| F | 0.52546700  | -4.38891600 | -3.65149100 |
| F | -3.13894900 | -6.90454300 | -0.49256300 |
| F | -2.20804100 | -8.11636900 | -2.75339000 |
| F | -0.37312100 | -6.85568000 | -4.32669200 |

**<sup>3</sup>TS9-R**

|   |             |             |             |
|---|-------------|-------------|-------------|
| N | -0.13203300 | 1.97918100  | -0.67924300 |
| N | 0.95681300  | -0.62164700 | -1.03007000 |
| N | -1.56437100 | -1.74408400 | -0.39685900 |
| N | -2.67814900 | 0.84948200  | -0.14848100 |
| C | -0.86346400 | 3.13697400  | -0.75425900 |
| C | 0.03933600  | 4.25860300  | -0.86610800 |
| C | 1.30357100  | 3.76434000  | -0.79421800 |
| C | 1.19309700  | 2.32695100  | -0.70905000 |
| C | 2.27660000  | 1.44982800  | -0.82289400 |

|    |             |             |             |
|----|-------------|-------------|-------------|
| C  | 2.13252300  | 0.08138100  | -1.08523100 |
| C  | 3.18442400  | -0.78867600 | -1.55947900 |
| C  | 2.61852600  | -2.00227200 | -1.80483000 |
| C  | 1.22862300  | -1.90634200 | -1.42900300 |
| C  | 0.34689500  | -2.98558400 | -1.34069600 |
| C  | -0.93949200 | -2.89740400 | -0.80168000 |
| C  | -1.77508500 | -4.02602300 | -0.48103900 |
| C  | -2.88700800 | -3.54006800 | 0.13788000  |
| C  | -2.76405700 | -2.10461600 | 0.16628800  |
| C  | -3.77193700 | -1.22871900 | 0.58414000  |
| C  | -3.73616400 | 0.15172400  | 0.37372300  |
| C  | -4.84377800 | 1.05454800  | 0.58387900  |
| C  | -4.44756300 | 2.27885700  | 0.14677100  |
| C  | -3.07368000 | 2.15254400  | -0.28294100 |
| H  | -0.26088500 | 5.28999800  | -0.97023200 |
| H  | 2.23395900  | 4.30958600  | -0.84796400 |
| H  | 4.20800700  | -0.49341700 | -1.73157400 |
| H  | 3.09699200  | -2.88923800 | -2.19299400 |
| H  | -1.52871100 | -5.05669900 | -0.68862900 |
| H  | -3.73513200 | -4.09579100 | 0.50915600  |
| H  | -5.80212600 | 0.77809300  | 0.99663000  |
| H  | -5.01266800 | 3.19889500  | 0.14966900  |
| Mn | -0.85012700 | 0.10935300  | -0.52946000 |
| Cl | -1.37734800 | 0.17579800  | -2.79900500 |
| O  | -0.47322200 | 0.18430300  | 1.14337000  |
| C  | 3.64290600  | 2.02643900  | -0.68408700 |
| C  | 4.04429600  | 2.55129800  | 0.55064200  |
| C  | 4.56710300  | 2.08467600  | -1.73153400 |
| C  | 5.30612300  | 3.10620700  | 0.73649000  |
| C  | 5.84816100  | 2.60144900  | -1.55813700 |
| C  | 6.21462000  | 3.11705000  | -0.31811500 |
| C  | -4.98805700 | -1.82598300 | 1.20419200  |
| C  | -4.93902600 | -2.37784000 | 2.48774600  |
| C  | -6.21037600 | -1.88277400 | 0.52726200  |
| C  | -6.05487200 | -2.96220800 | 3.08171700  |
| C  | -7.34268000 | -2.45479000 | 1.10345000  |
| C  | -7.26167800 | -2.99815100 | 2.38476900  |
| F  | 4.23422600  | 1.61794100  | -2.94452100 |
| F  | 6.71456000  | 2.61975300  | -2.57278100 |
| F  | 7.44246300  | 3.60609500  | -0.13127500 |
| F  | 5.66260500  | 3.59628400  | 1.92955300  |
| F  | 3.20733000  | 2.51974900  | 1.59580500  |
| F  | -6.31370200 | -1.37428900 | -0.70631100 |
| F  | -3.79171100 | -2.35354100 | 3.18188900  |

|   |             |             |             |
|---|-------------|-------------|-------------|
| F | -5.97790900 | -3.48083800 | 4.31108600  |
| F | -8.33871900 | -3.55155300 | 2.94419500  |
| F | -8.49916900 | -2.49339400 | 0.43537200  |
| C | 6.35701900  | 0.63557900  | 2.43436200  |
| C | 5.37398100  | 0.66674800  | 3.37673000  |
| C | 4.13162600  | -0.04039500 | 3.22931500  |
| C | 6.14156600  | -0.11559500 | 1.18563000  |
| H | 5.51748300  | 1.26194100  | 4.27622200  |
| C | 1.88146400  | -0.64729100 | 3.92782900  |
| H | 4.84081300  | -1.39588400 | 0.29273400  |
| C | 1.71379700  | -1.44495700 | 2.77300900  |
| C | 2.77078000  | -1.54985700 | 1.86878900  |
| H | 1.06920400  | -0.55185100 | 4.63955600  |
| C | 7.67052600  | 1.35828000  | 2.57015600  |
| H | 7.61476300  | 2.05050600  | 3.41677100  |
| H | 7.84290800  | 1.95904900  | 1.67202900  |
| C | 0.40546800  | -2.07800200 | 2.41412500  |
| H | 0.56534300  | -2.89712100 | 1.70489700  |
| H | -0.12743800 | -1.27858200 | 1.80981800  |
| C | -0.52975300 | -2.50102600 | 3.54300400  |
| H | -1.43352600 | -2.95609600 | 3.13202500  |
| H | -0.84467300 | -1.64901500 | 4.15240400  |
| H | -0.04444900 | -3.22917100 | 4.20296800  |
| C | 8.85368200  | 0.38979400  | 2.74613600  |
| H | 9.79402700  | 0.94304100  | 2.83479800  |
| H | 8.92609900  | -0.27335700 | 1.88054800  |
| H | 8.73062500  | -0.22214300 | 3.64584300  |
| C | -2.25242000 | 3.23140300  | -0.62841500 |
| C | -2.89624400 | 4.56729700  | -0.77036700 |
| C | -3.75769000 | 4.83140900  | -1.84099400 |
| C | -2.69579100 | 5.59081000  | 0.16112000  |
| C | -4.38760000 | 6.06558900  | -1.98812800 |
| C | -3.30888500 | 6.83443100  | 0.03042300  |
| C | -4.15927000 | 7.06986400  | -1.04881400 |
| F | -1.89188400 | 5.38806700  | 1.21424300  |
| F | -3.09599800 | 7.79592900  | 0.93475300  |
| F | -4.75518300 | 8.25611300  | -1.18149300 |
| F | -5.20424200 | 6.29288700  | -3.02090600 |
| F | -3.99836600 | 3.88328100  | -2.75175700 |
| C | 3.95712100  | -0.84214000 | 2.07668900  |
| C | 3.06911300  | 0.02790000  | 4.15245600  |
| H | 3.18967400  | 0.64054600  | 5.04180600  |
| H | 2.66243600  | -2.16173800 | 0.98050200  |
| N | 4.98155200  | -0.87705600 | 1.14986400  |

|   |             |             |             |
|---|-------------|-------------|-------------|
| O | 6.89727600  | -0.08942400 | 0.21075200  |
| C | 0.84412100  | -4.33664100 | -1.72230000 |
| C | 1.77612100  | -5.01454900 | -0.93187600 |
| C | 0.37853900  | -4.98569300 | -2.86948200 |
| C | 2.24675600  | -6.28065500 | -1.26744800 |
| C | 0.83022300  | -6.25586100 | -3.22444400 |
| C | 1.76879900  | -6.90181300 | -2.42111100 |
| F | 2.23779600  | -4.44368500 | 0.19527500  |
| F | -0.52546700 | -4.38891600 | -3.65149100 |
| F | 3.13894900  | -6.90454300 | -0.49256400 |
| F | 2.20804100  | -8.11636900 | -2.75339000 |
| F | 0.37312100  | -6.85568000 | -4.32669200 |

**<sup>5</sup>TS9-S**

|   |             |             |             |
|---|-------------|-------------|-------------|
| N | -0.47100200 | -1.88173600 | 0.43565300  |
| N | -2.79909800 | -0.23427400 | 0.26620400  |
| N | -1.10020300 | 2.05631800  | 0.22260200  |
| N | 1.16718800  | 0.41287100  | 0.56078300  |
| C | 0.66419700  | -2.50219500 | 0.89799500  |
| C | 0.44870500  | -3.92510500 | 0.93580200  |
| C | -0.80915900 | -4.15142700 | 0.46299400  |
| C | -1.39679500 | -2.86248900 | 0.19577900  |
| C | -2.75677000 | -2.66802900 | -0.08785300 |
| C | -3.40634900 | -1.43453200 | 0.00653800  |
| C | -4.83760300 | -1.23648300 | -0.07285600 |
| C | -5.07129100 | 0.07771500  | 0.17467700  |
| C | -3.78071000 | 0.71162300  | 0.33705200  |
| C | -3.56993500 | 2.09478600  | 0.39192400  |
| C | -2.31708100 | 2.69953300  | 0.26595300  |
| C | -2.11176800 | 4.11092900  | 0.06130900  |
| C | -0.77893300 | 4.30269200  | -0.13721000 |
| C | -0.13844900 | 3.02084500  | -0.00368200 |
| C | 1.24036500  | 2.81185700  | 0.01269900  |
| C | 1.83413800  | 1.58504000  | 0.33628200  |
| C | 3.24186500  | 1.40123500  | 0.61096200  |
| C | 3.39952400  | 0.12397200  | 1.04528900  |
| C | 2.09752700  | -0.50089500 | 0.98965300  |
| H | 1.16723700  | -4.65693500 | 1.27137800  |
| H | -1.31645000 | -5.09917200 | 0.36127700  |
| H | -5.56500300 | -2.00899400 | -0.26951700 |
| H | -6.02392100 | 0.58341200  | 0.21284200  |
| H | -2.89582100 | 4.85312500  | 0.04477600  |
| H | -0.26884900 | 5.23328900  | -0.33495800 |
| H | 4.00357700  | 2.15784700  | 0.50216600  |

|    |             |             |             |
|----|-------------|-------------|-------------|
| H  | 4.32050000  | -0.37211500 | 1.31455300  |
| Mn | -0.81422000 | 0.10780100  | 0.36727000  |
| Cl | -1.00432800 | 0.10539900  | 2.68833700  |
| O  | -0.78016800 | 0.14820000  | -1.39015600 |
| C  | -3.55656600 | -3.87734600 | -0.42846000 |
| C  | -3.32196900 | -4.56992700 | -1.62093900 |
| C  | -4.53872000 | -4.39100000 | 0.42492400  |
| C  | -4.03593300 | -5.71453000 | -1.96461400 |
| C  | -5.27108300 | -5.53118000 | 0.10087700  |
| C  | -5.01627600 | -6.19534800 | -1.09792200 |
| C  | 2.15352000  | 3.96766600  | -0.21318600 |
| C  | 2.99922200  | 4.00413000  | -1.32517100 |
| C  | 2.26308400  | 5.02061000  | 0.70152300  |
| C  | 3.93043500  | 5.01913600  | -1.51919500 |
| C  | 3.17098500  | 6.06230800  | 0.51843500  |
| C  | 4.01253200  | 6.05764500  | -0.59354400 |
| F  | -4.79797600 | -3.78299900 | 1.58878800  |
| F  | -6.20577600 | -5.99691100 | 0.93441900  |
| F  | -5.70931200 | -7.28984000 | -1.41551700 |
| F  | -3.79001800 | -6.35032700 | -3.11412900 |
| F  | -2.38063500 | -4.13449800 | -2.47435700 |
| F  | 1.48783600  | 5.04228300  | 1.79177600  |
| F  | 2.94022300  | 3.02508300  | -2.23919300 |
| F  | 4.73901700  | 4.99791800  | -2.58586600 |
| F  | 4.89307200  | 7.04388600  | -0.76973400 |
| F  | 3.25135200  | 7.05568600  | 1.40839900  |
| C  | 5.87074600  | 0.32910400  | -1.73247900 |
| C  | 4.94064300  | 0.79162300  | -2.61557200 |
| C  | 3.72578500  | 0.08297000  | -2.89975500 |
| C  | 5.65580300  | -0.96186700 | -1.05686600 |
| H  | 5.08361700  | 1.76283900  | -3.08409900 |
| C  | 1.49420500  | -0.07634100 | -3.84512900 |
| H  | 4.38029200  | -2.54238100 | -0.99301900 |
| C  | 1.25643600  | -1.28032400 | -3.13435400 |
| C  | 2.29040700  | -1.82860100 | -2.37335400 |
| H  | 0.70140700  | 0.35820800  | -4.44245000 |
| C  | 7.12318500  | 1.07891100  | -1.36951200 |
| H  | 7.04737900  | 2.10974700  | -1.73421600 |
| H  | 7.19803400  | 1.11719500  | -0.27607400 |
| C  | -0.11142600 | -1.84851500 | -3.01460600 |
| H  | -0.09473000 | -2.85845300 | -2.59356700 |
| H  | -0.55577500 | -1.17968300 | -2.18161900 |
| C  | -1.06097300 | -1.74728100 | -4.20391900 |
| H  | -2.02168900 | -2.19916400 | -3.94782000 |



|   |             |             |             |
|---|-------------|-------------|-------------|
| H | -1.24710500 | -0.70812200 | -4.48857800 |
| H | -0.65804700 | -2.27389900 | -5.07706500 |
| C | 8.39546200  | 0.41103800  | -1.92318000 |
| H | 9.28625600  | 0.97512200  | -1.62928900 |
| H | 8.48420100  | -0.60426700 | -1.52956600 |
| H | 8.36656500  | 0.36177200  | -3.01657000 |
| C | 1.86510800  | -1.85740800 | 1.22524600  |
| C | 2.97613600  | -2.63434000 | 1.84329700  |
| C | 3.41958000  | -2.31219100 | 3.13379200  |
| C | 3.65939000  | -3.66084300 | 1.19008200  |
| C | 4.49284800  | -2.97085200 | 3.73002900  |
| C | 4.73905100  | -4.32929600 | 1.75481000  |
| C | 5.15452400  | -3.98410600 | 3.03881100  |
| F | 3.30986100  | -4.00950100 | -0.07342900 |
| F | 5.37330800  | -5.28749200 | 1.07513200  |
| F | 6.18222200  | -4.61822400 | 3.60204700  |
| F | 4.88858500  | -2.63973600 | 4.96117700  |
| F | 2.81809400  | -1.33851400 | 3.82180700  |
| C | 3.51040200  | -1.15828000 | -2.25145900 |
| C | 2.70121300  | 0.58234600  | -3.73172500 |
| H | 2.85847200  | 1.52762200  | -4.24097200 |
| H | 2.12467300  | -2.74160500 | -1.81111400 |
| N | 4.51756600  | -1.64954500 | -1.44641600 |
| O | 6.39278300  | -1.42892900 | -0.18317600 |
| C | -4.75558300 | 2.99279000  | 0.49106900  |
| C | -4.99041100 | 3.73795100  | 1.65155100  |
| C | -5.65654000 | 3.14867000  | -0.56659300 |
| C | -6.08231400 | 4.59649100  | 1.76335500  |
| C | -6.75860800 | 3.99529100  | -0.47507300 |
| C | -6.96931200 | 4.72237900  | 0.69548000  |
| F | -4.15061600 | 3.64066900  | 2.68692100  |
| F | -6.28513700 | 5.29615100  | 2.88354000  |
| F | -8.01949700 | 5.53969800  | 0.79263800  |
| F | -7.60647700 | 4.12167000  | -1.50135900 |
| F | -5.47219300 | 2.46887200  | -1.70694400 |

**<sup>5</sup>TS9-R**

|   |             |             |            |
|---|-------------|-------------|------------|
| N | 0.47100200  | -1.88173600 | 0.43565300 |
| N | 2.79909800  | -0.23427400 | 0.26620400 |
| N | 1.10020300  | 2.05631800  | 0.22260200 |
| N | -1.16718800 | 0.41287100  | 0.56078300 |
| C | -0.66419700 | -2.50219500 | 0.89799500 |
| C | -0.44870500 | -3.92510500 | 0.93580200 |
| C | 0.80915900  | -4.15142700 | 0.46299400 |

|    |             |             |             |
|----|-------------|-------------|-------------|
| C  | 1.39679500  | -2.86248900 | 0.19577900  |
| C  | 2.75677000  | -2.66802900 | -0.08785300 |
| C  | 3.40634900  | -1.43453200 | 0.00653800  |
| C  | 4.83760300  | -1.23648300 | -0.07285600 |
| C  | 5.07129100  | 0.07771500  | 0.17467700  |
| C  | 3.78071000  | 0.71162300  | 0.33705200  |
| C  | 3.56993500  | 2.09478600  | 0.39192400  |
| C  | 2.31708100  | 2.69953300  | 0.26595300  |
| C  | 2.11176800  | 4.11092900  | 0.06130900  |
| C  | 0.77893300  | 4.30269200  | -0.13721000 |
| C  | 0.13844900  | 3.02084500  | -0.00368200 |
| C  | -1.24036500 | 2.81185700  | 0.01269900  |
| C  | -1.83413800 | 1.58504000  | 0.33628200  |
| C  | -3.24186500 | 1.40123500  | 0.61096200  |
| C  | -3.39952400 | 0.12397200  | 1.04528900  |
| C  | -2.09752700 | -0.50089500 | 0.98965300  |
| H  | -1.16723700 | -4.65693500 | 1.27137800  |
| H  | 1.31645000  | -5.09917200 | 0.36127700  |
| H  | 5.56500300  | -2.00899400 | -0.26951700 |
| H  | 6.02392000  | 0.58341200  | 0.21284200  |
| H  | 2.89582100  | 4.85312500  | 0.04477600  |
| H  | 0.26884900  | 5.23328900  | -0.33495800 |
| H  | -4.00357700 | 2.15784700  | 0.50216600  |
| H  | -4.32050000 | -0.37211500 | 1.31455300  |
| Mn | 0.81422000  | 0.10780100  | 0.36727000  |
| Cl | 1.00432800  | 0.10539900  | 2.68833700  |
| O  | 0.78016800  | 0.14820000  | -1.39015600 |
| C  | 3.55656600  | -3.87734600 | -0.42846000 |
| C  | 3.32196900  | -4.56992700 | -1.62093900 |
| C  | 4.53872000  | -4.39100000 | 0.42492400  |
| C  | 4.03593300  | -5.71453000 | -1.96461400 |
| C  | 5.27108300  | -5.53118000 | 0.10087700  |
| C  | 5.01627600  | -6.19534800 | -1.09792200 |
| C  | -2.15352000 | 3.96766600  | -0.21318600 |
| C  | -2.99922200 | 4.00413000  | -1.32517100 |
| C  | -2.26308400 | 5.02061000  | 0.70152300  |
| C  | -3.93043500 | 5.01913600  | -1.51919500 |
| C  | -3.17098500 | 6.06230800  | 0.51843500  |
| C  | -4.01253200 | 6.05764500  | -0.59354400 |
| F  | 4.79797600  | -3.78299900 | 1.58878800  |
| F  | 6.20577600  | -5.99691100 | 0.93441900  |
| F  | 5.70931100  | -7.28984000 | -1.41551700 |
| F  | 3.79001800  | -6.35032700 | -3.11412900 |
| F  | 2.38063500  | -4.13449800 | -2.47435700 |

|   |             |             |             |
|---|-------------|-------------|-------------|
| F | -1.48783600 | 5.04228200  | 1.79177600  |
| F | -2.94022300 | 3.02508300  | -2.23919300 |
| F | -4.73901700 | 4.99791800  | -2.58586600 |
| F | -4.89307100 | 7.04388600  | -0.76973400 |
| F | -3.25135100 | 7.05568600  | 1.40839900  |
| C | -5.87074600 | 0.32910400  | -1.73247900 |
| C | -4.94064300 | 0.79162300  | -2.61557200 |
| C | -3.72578500 | 0.08297000  | -2.89975500 |
| C | -5.65580300 | -0.96186700 | -1.05686600 |
| H | -5.08361600 | 1.76283900  | -3.08409900 |
| C | -1.49420500 | -0.07634100 | -3.84512900 |
| H | -4.38029200 | -2.54238100 | -0.99301900 |
| C | -1.25643600 | -1.28032400 | -3.13435400 |
| C | -2.29040700 | -1.82860100 | -2.37335400 |
| H | -0.70140700 | 0.35820800  | -4.44245000 |
| C | -7.12318500 | 1.07891200  | -1.36951200 |
| H | -7.04737900 | 2.10974800  | -1.73421600 |
| H | -7.19803400 | 1.11719600  | -0.27607400 |
| C | 0.11142600  | -1.84851500 | -3.01460600 |
| H | 0.09473000  | -2.85845300 | -2.59356700 |
| H | 0.55577500  | -1.17968300 | -2.18161900 |
| C | 1.06097300  | -1.74728100 | -4.20391900 |
| H | 2.02168900  | -2.19916400 | -3.94782000 |
| H | 1.24710500  | -0.70812200 | -4.48857800 |
| H | 0.65804700  | -2.27389900 | -5.07706500 |
| C | -8.39546200 | 0.41103900  | -1.92318000 |
| H | -9.28625600 | 0.97512300  | -1.62928900 |
| H | -8.48420100 | -0.60426600 | -1.52956600 |
| H | -8.36656500 | 0.36177300  | -3.01657000 |
| C | -1.86510800 | -1.85740800 | 1.22524600  |
| C | -2.97613600 | -2.63434000 | 1.84329700  |
| C | -3.41958000 | -2.31219100 | 3.13379200  |
| C | -3.65939000 | -3.66084300 | 1.19008200  |
| C | -4.49284800 | -2.97085200 | 3.73002900  |
| C | -4.73905100 | -4.32929600 | 1.75481000  |
| C | -5.15452400 | -3.98410600 | 3.03881100  |
| F | -3.30986100 | -4.00950100 | -0.07342900 |
| F | -5.37330800 | -5.28749200 | 1.07513200  |
| F | -6.18222100 | -4.61822400 | 3.60204700  |
| F | -4.88858500 | -2.63973600 | 4.96117700  |
| F | -2.81809400 | -1.33851400 | 3.82180700  |
| C | -3.51040200 | -1.15828000 | -2.25145900 |
| C | -2.70121300 | 0.58234600  | -3.73172500 |
| H | -2.85847200 | 1.52762200  | -4.24097200 |

|   |             |             |             |
|---|-------------|-------------|-------------|
| H | -2.12467300 | -2.74160500 | -1.81111400 |
| N | -4.51756600 | -1.64954500 | -1.44641600 |
| O | -6.39278300 | -1.42892900 | -0.18317600 |
| C | 4.75558300  | 2.99279000  | 0.49106900  |
| C | 4.99041100  | 3.73795100  | 1.65155100  |
| C | 5.65654000  | 3.14867000  | -0.56659300 |
| C | 6.08231400  | 4.59649100  | 1.76335500  |
| C | 6.75860800  | 3.99529100  | -0.47507300 |
| C | 6.96931200  | 4.72237800  | 0.69548000  |
| F | 4.15061600  | 3.64066900  | 2.68692100  |
| F | 6.28513700  | 5.29615200  | 2.88354000  |
| F | 8.01949700  | 5.53969700  | 0.79263800  |
| F | 7.60647700  | 4.12166900  | -1.50135900 |
| F | 5.47219300  | 2.46887200  | -1.70694400 |
